# Supplementary material for: Nucleosomes impede Cas9 access to DNA in vivo and in vitro
Source: eLife journal article supplement (doi:10.7554/elife.12677), 2016-03-17
Supplement: supp [file elife_poa_e12677_Supplementary_File_1.xlsx]

## Sheet: Table_S1.txt
gene symbol	chromosome	PAM genomic coordinate [hg19]	strand targeted	sgRNA length (including PAM)	sgRNA sequence	FANTOM 5 TSS [Where P1 and P2 are >1kb apart, TSSs were treated separately and sgRNAs assigned to the closest TSS; otherwise, P1P2 indicates all coordinates are related to the P1 TSS]	Position relative to FANTOM5 TSS	Activity score	Target site MNase signal	Doench et al. Nat. Biotech. 2014 sgRNA sequence score
AATF	chr16	35306124	+	24	GCGCGTGCGAGTGCGCGGGAA	P1P2	-201	-0.0612021	0.0708333	0.0198586
AATF	chr16	35306178	+	23	GGAAGCGCGCAGAAGGTTGA	P1P2	-147	0.0578138	0.00869565	0.056713
AATF	chr16	35306366	+	24	GTAAATGTGCGGCCCAACCCC	P1P2	41	0.0936121	0.025	0.268053
AATF	chr16	35306169	-	24	GCACGCGCACACGCGCCCATA	P1P2	-156	0.0281302	0.1	0.0913406
AATF	chr16	35306286	-	24	GAAGTGGCCGGTCCAGAGCTG	P1P2	-39	0.963578	0.0625	0.118658
AATF	chr16	35306309	-	23	GGTGGCCTCCGCGCGGTCTC	P1P2	-16	1.21762	0	0.0193602
AATF	chr16	35306319	-	23	GCGCGGTCTCTGGCGGAGTC	P1P2	-6	0.0186658	0	0.0186971
AATF	chr16	35306340	-	23	GGGAATCGGATCAAGGCGAG	P1P2	15	0.818805	0.026087	0.13239
AATF	chr16	35306413	-	22	GCGCGAAGCGGAGTGGACC	P1P2	88	0.228625	0.168182	0.0312292
AATF	chr16	35306428	-	22	GACCGGGAGCTGGTGACGA	P1P2	103	0.345528	0.313636	0.113126
ABCC1	chr16	16043415	+	24	GCCTGGTTGGCCCGCGCGTCA	P1P2	-87	0.181066	0	0.0258013
ABCC1	chr16	16043482	+	23	GCTGGCGCTAGCGCTggcgg	P1P2	-20	0.969184	0	0.5822
ABCC1	chr16	16043488	+	25	GCCCGGCTGCTGGCGCTAGCGC	P1P2	-14	1.16411	0	0.0445336
ABCC1	chr16	16043545	+	24	Gatcgggcccggttgctggcg	P1P2	43	0.054592	0	0.193313
ABCC1	chr16	16043560	-	24	Gccgccgcccgcgccagcaac	P1P2	58	-0.0333171	0	0.193313
ABCC1	chr16	16043655	-	24	GCCGATGGCTCCGACCCGCTC	P1P2	153	0.585706	0	0.0170736
ABCC1	chr16	16043667	-	24	GACCCGCTCTGGGTACGTGCC	P1P2	165	0.135333	0	0.0422686
ABCC1	chr16	16043679	-	24	GTACGTGCCGGGGGCCGCGTG	P1P2	177	0.866708	0	0.0335431
ABCC1	chr6	16043687	-	23	GGGGGCCGCGTGAGGCCGGC	P1P2	185	0.720377	0	0.150467
ABCC1	chr6	16043722	-	25	GCCGGCGGGGAGGGAAAGCACC	P1P2	220	0.317453	0	0.0880304
ABCC4	chr6	95953393	+	24	GCTGCCCAAGCCCTCTGCGGC	P1P2	271	0.0563709	0	0.0150187
ABCC4	chr6	95953430	+	24	GGCGCCGCGGACGCACTCTCC	P1P2	234	1.02377	0	0.00821747
ABCC4	chr6	95953470	+	24	GTGAGTGTCCCCGCCCGAAAC	P1P2	194	0.6621	0	0.105041
ABCC4	chr6	95953641	+	24	GAGCCCCAGCATCCCTGCTTG	P1P2	23	1.00651	0	0.0610282
ABCC4	chr6	95953458	-	23	GAGTGCGTCCGCGGCGCCAG	P1P2	206	0.969716	0	0.290962
ABCC4	chr6	95953484	-	24	GCAGGGTGACCTGTTTCGGGC	P1P2	180	0.161423	0	0.0459989
ABCC4	chr6	95953540	-	24	GTTCGCGTCCTGCAGCGGGTT	P1P2	124	0.301618	0.0166667	0.0188806
ABCC4	chr6	95953561	-	24	GGGCTTCACCTCCTGGTACAC	P1P2	103	0.909537	0.1	0.14704
ABCC4	chr17	95953614	-	24	GccggggTCGCGCTGATCAGG	P1P2	50	0.906939	0	0.380817
ABCC4	chr17	95953716	-	23	GCCTGTGAAGCAGCCGCTTC	P1P2	-52	0.238265	0	0.0112536
ACTR8	chr17	53916004	+	23	GGTGCCGGAGTCGCTGCAAG	P1P2	165	-0.0537495	0.195652	0.348946
ACTR8	chr17	53916025	+	23	GCGGCCCATCGTGCCCGCGC	P1P2	144	-0.0387245	0.869565	0.0211517
ACTR8	chr17	53916070	+	24	Gaaaggagaagggcggcgaga	P1P2	99	0.135454	0.3125	0.193313
ACTR8	chr17	53916088	+	23	GGGTGATACggagaacggaa	P1P2	81	0.612495	0.226087	0.164082
ACTR8	chr17	53916118	+	23	GTCTCCGGCCATAATGACCC	P1P2	51	1.07917	0.143478	0.260169
ACTR8	chr17	53916157	+	24	GCAGTCGTGGCTGCAGCGCTG	P1P2	12	0.978389	0	0.078767
ACTR8	chr17	53916171	+	24	GCCCTTCCATCCCGGCAGTCG	P1P2	-2	0.942439	0	0.0485278
ACTR8	chr17	53916239	+	24	GAGCCCTCTGGGGCGACTCCG	P1P2	-70	0.0527798	0	0.401948
ACTR8	chrX	53916043	-	23	GGCACCAGCGCGGGCACGAT	P1P2	126	0.058377	0.643478	0.0816998
ACTR8	chrX	53916235	-	24	GCCGGCTGCCCACAGTCAAGA	P1P2	-66	0.0678012	0	0.202924
ADSS	chrX	244615289	+	24	GGTACCCCCTTGAGCGGGCTG	P1P2	-90	0.470805	0	0.212474
ADSS	chrX	244615321	+	24	GCTGCCGAGGCCGGCCTGCGC	P1P2	-122	0.453111	0	0.00177159
ADSS	chrX	244615389	+	23	GAAGGGGCGTGGCCTCGGTC	P1P2	-190	0.0834749	0	0.0410008
ADSS	chrX	244615406	+	24	GTGGCGCGCCAGGCCGCGGAA	P1P2	-207	0.156686	0	0.123839
ADSS	chrX	244615191	-	23	GAGCGAACTGAACTGCTCTG	P1P2	8	1.40189	0.0739131	0.833802
ADSS	chrX	244615211	-	24	GCGGCCGCCAGCCACATGCAG	P1P2	-12	1.12731	0.0583333	0.269595
ADSS	chrX	244615421	-	24	GGCCACGCCCCTTCCGCGGCC	P1P2	-222	0.0116382	0	0.0261322
ADSS	chrX	244615458	-	23	GCAAACCTCGCGAGCGGAAA	P1P2	-259	-0.0119247	0	0.145934
ADSS	chrX	244615468	-	24	GCGAGCGGAAAAGGTCAGGGG	P1P2	-269	0.0330872	0	0.225761
AIFM1	chrX	129299613	+	23	GCCGAAATGTTCCGGTGTGG	P1P2	60	0.16161	0.373913	0.0962454
AIFM1	chrX	129299638	+	24	GAAGGAGGAGGTCCCGAATAG	P1P2	35	0.998718	1.25	0.23657
AIFM1	chrX	129299709	+	24	GTGTGAAGAGACTGGGGGAGC	P1P2	-36	0.80574	0.5	0.0164209
AIFM1	chrX	129299718	+	24	GTAATGTGCGTGTGAAGAGAC	P1P2	-45	1.04008	0.370833	0.029877
AIFM1	chr16	129299870	+	21	GCAAATCCTCTCGCCGTG	P1P2	-197	-0.10462	0	0.721328
AIFM1	chr16	129299612	-	23	GCTTCAAAGCACCCGCCGCC	P1P2	61	0.063004	0.404348	0.447225
AIFM1	chr16	129299803	-	24	GAGAAGCCGGCCTGCTAGAGC	P1P2	-130	0.961202	0.1	0.0178111
AIFM1	chr16	129299826	-	24	GGGAAGGGGAACGGCGACCGG	P1P2	-153	0.378577	0.1	0.376881
AIFM1	chr16	129299839	-	22	GACCGGAGGCCTACTGCGC	P1P2	-166	0.771355	0.0590909	0.0313675
AIFM1	chr16	129299884	-	24	GCGATTGGTCCGCACGGCGAG	P1P2	-211	0.0970812	0	0.315965
ALAD	chr16	116163331	+	22	GTCCCGTGGAGCGTTTGTT	P1P2	198	0.187019	0.2	0.0794202
ALAD	chr16	116163344	+	24	GCAGCCGTGCACGGAGTCCCG	P1P2	185	0.110362	0.120833	0.233422
ALAD	chr16	116163369	+	24	GCTGTGCGCCTGAAGCCCTGG	P1P2	160	0.273016	0.0541667	0.254889
ALAD	chr16	116163459	+	24	GGGCTGGATGCGGGGAGATAG	P1P2	70	0.301055	0.429167	0.0958771
ALAD	chr13	116163490	+	24	GCCGGGAGCCCTTAGGGAGGC	P1P2	39	0.837857	0.404167	0.0185482
ALAD	chr13	116163498	+	24	GAGCAGCGGCCGGGAGCCCTT	P1P2	31	1.13906	0.329167	0.110709
ALAD	chr13	116163558	+	23	GAGCCCCCCCCGCTCTTACG	P1P2	-29	0.515879	0.1	0.622017
ALAD	chr13	116163384	-	23	GGCTGCACCGCCAGGGCTTC	P1P2	145	0.230771	0.0913043	0.00265625
ALAD	chr13	116163546	-	23	GTCACCGCTGTCTCCCGCTC	P1P2	-17	1.02308	0.117391	0.116216
ALAD	chr13	116163652	-	23	GCCCCCTGAAGGCGGTCTTC	P1P2	-123	0.0163986	0	0.00636867
ANAPC13	chr13	134204764	+	24	GGTTTCCAGCGCCCCCGGCCT	P1P2	51	-0.00257041	0.0333333	0.0929948
ANAPC13	chr13	134204787	+	23	GCGGTGGCCGGGTGCCGGTA	P1P2	28	1.10106	0	0.00394257
ANAPC13	chr13	134204803	+	22	GAGCAAGCGTCTGCCGCGG	P1P2	12	0.778129	0	0.154937
ANAPC13	chr13	134204841	+	24	GCAGACACGTGATGCGGGGGA	P1P2	-26	0.0526882	0.1	0.0407851
ANAPC13	chr4	134205394	+	23	GCGCAGCTCGCTCGCCCACC	P1P2	-579	0.0173269	0.0565217	0.0824862
ANAPC13	chr4	134205417	+	25	GTCCGCCGGGGAAGGTGAGTAC	P1P2	-602	-0.0391301	0.056	0.0123563
ANAPC13	chr4	134205433	+	23	GAAAAGGAAGGTGGGTCCGC	P1P2	-618	0.0578439	0	0.04821
ANAPC13	chr4	134205445	+	22	GTCTCTCCGCTGAAAAGGA	P1P2	-630	0.000524231	0.0363636	0.284964
ANAPC13	chr4	134204614	-	25	GTACCAAACGTGGAAGCGGAGA	P1P2	201	0.217712	0.092	0.117674
ANAPC13	chr4	134204625	-	24	GAAGCGGAGACGGGGAGGTCT	P1P2	190	0.0695453	0.0416667	0.0172835
ANAPC13	chr4	134204710	-	25	GTAAAGTGACAGCCTCGGCCGA	P1P2	105	-0.039702	0.996	0.0239337
ANAPC13	chr4	134204719	-	23	GCCTCGGCCGATGGGAATAG	P1P2	96	0.182714	0.804348	0.257724
ANAPC13	chr4	134204776	-	23	GCCTCCAAAACCTAGGCCGG	P1P2	39	0.453645	0.134783	0.190622
ANAPC13	chr4	134204795	-	22	GGGCGCTGGAAACCCTTAC	P1P2	20	1.12081	0	0.221212
ANAPC13	chr17	134205401	-	24	GCGCTTCGGAGAGTGGCCAGG	P1P2	-586	0.0206249	0.0333333	0.142644
ANAPC13	chr17	134205436	-	24	GCGCCCAGTACTCACCTTCCC	P1P2	-621	0.168261	0.0791667	0.153168
ANAPC13	chr17	134205515	-	23	GCTGTCTAGCTAGCGCTGTT	P1P2	-700	0.0381786	0.0652174	0.218589
ANAPC13	chr17	134205531	-	22	GTTGGGACTACTTCATTCA	P1P2	-716	0.0966834	0.472727	0.120159
ANAPC13	chr17	134205538	-	24	GACTACTTCATTCACGGCACA	P1P2	-723	-0.0426831	0.65	0.0655805
ANAPC13	chr17	134205559	-	22	GGGACCCGCTCATTTAGTG	P1P2	-744	0.0689569	0.854545	0.14006
ANAPC4	chr17	25378925	+	24	GGCAGACTAACACGGCCCCAG	P1P2	19	0.413682	0	0.385632
ANAPC4	chr17	25379106	+	24	GACCAGGAAAATAATCTCCTG	P1P2	200	0.237859	0.00833333	0.15453
ANAPC4	chr17	25378914	-	25	GCTGTGGCGCGCGGCCGGCAGA	P1P2	8	1.03027	0	0.133515
ANAPC4	chr17	25378954	-	24	GGGCCGTGTTAGTCTGCCGGT	P1P2	48	1.00659	0	0.216676
ANAPC4	chr1	25378966	-	25	GTCTGCCGGTGGGGACTCTTGC	P1P2	60	0.625784	0.032	0.0903092
ANAPC4	chr1	25378972	-	23	GTGGGGACTCTTGCAGGTAC	P1P2	66	0.963143	0.0652174	0.0845084
ANAPC4	chr1	25378993	-	23	GGCGCGGTCGGGGCTCCTCG	P1P2	87	0.607496	0.217391	0.335418
ANAPC4	chr1	25379001	-	25	GTCGGGGCTCCTCGTGGAGAGC	P1P2	95	0.00847575	0.252	0.00781429
ANAPC4	chr1	25379027	-	24	GCTCCTGCCGGCCTCTGACTG	P1P2	121	0.023378	0.683333	0.0578139
ANAPC4	chr1	25379092	-	25	GTTTCCCATCCTTCCGGGTGGT	P1P2	186	0.00806432	0.324	0.0545864
ANAPC5	chr1	121789966	+	24	GTCAGCCTCATGGAGCGGCGG	P1P2	238	0.650337	0.0916667	0.322571
ANAPC5	chr1	121789972	+	24	GGCGCCGTCAGCCTCATGGAG	P1P2	232	1.01527	0.145833	0.291386
ANAPC5	chr1	121790000	+	24	GCTGAACGAGATGAGCCGCAC	P1P2	204	0.612327	1.04167	0.0773966
ANAPC5	chr1	121790034	+	24	GGGTGACGCCGTACAAGATCG	P1P2	170	0.456702	1.32083	0.726559
ANAPC5	chr3	121790069	+	24	GGTTGTGCACGCCAATGTGTT	P1P2	135	0.245151	1.775	0.156749
ANAPC5	chr3	121790149	+	23	GCGGGCCCGAGACTTAGTCT	P1P2	55	0.303704	0.5	0.0836784
ANAPC5	chr3	121790181	+	24	GTGCCTTGTGGTGACAACTGG	P1P2	23	1.08656	0.220833	0.510652
ANAPC5	chr3	121790131	-	23	GATTGAAGTAGAGGCTCTCG	P1P2	73	0.827528	0.221739	0.287898
ANAPC5	chr3	121790144	-	24	GGCTCTCGTGGACGCTGGCCA	P1P2	60	-0.00158182	0.370833	0.292427
ANAPC5	chr3	121790166	-	24	GGCGGCCCGAGACTAAGTCTC	P1P2	38	0.087432	0.5	0.175016
API5	chr3	43333652	+	24	GTGAGCGACAAGCCCAGGGCC	P1P2	44	-0.0408734	1.00833	0.23277
API5	chr3	43333742	+	23	GCCCGGGGACTCAACTCACC	P1P2	134	0.353189	0.00434783	0.0806863
API5	chr3	43333785	+	24	GGAAGCGCTTTCGAAAGGCCG	P1P2	177	0.400172	0	0.762278
API5	chr3	43333791	+	21	GCGGGAAGCGCTTTCGAA	P1P2	183	0.823967	0	0.066068
API5	chr3	43333825	+	24	GATGAAGCCGCAGCCCCCGCT	P1P2	217	0.366626	0	0.353445
API5	chr3	43333524	-	23	GCGTCTTTACGTAGACGTCG	P1P2	-84	-0.11335	0.147826	0.535165
API5	chr3	43333590	-	24	GCAGCTGGAGGTGTAATAGTG	P1P2	-18	0.812179	0	0.21381
API5	chr3	43333597	-	24	GAGGTGTAATAGTGCGGGTAG	P1P2	-11	0.985789	0	0.040807
API5	chr3	43333619	-	23	GGTTTGGAGAAGTTCCGAGG	P1P2	11	1.07792	0.0695652	0.263893
API5	chr14	43333824	-	24	GCGCTTCCCGCCGCACTCCCC	P1P2	216	0.936289	0	0.0553472
AQR	chr14	35261835	+	24	GAGCGGTCCTTTAGTTTCCAC	P1P2	54	0.604655	0.333333	0.156256
AQR	chr14	35261914	+	24	GCCCGGAGCGTTTGTGCGGCG	P1P2	-25	0.14948	0.1	0.44208
AQR	chr14	35261951	+	24	GGGTTCCCTACGGGACTCTGA	P1P2	-62	0.0426204	0.341667	0.444194
AQR	chr14	35261962	+	23	GCTGTTGTACGGGTTCCCTA	P1P2	-73	1.00432	0.352174	0.855458
AQR	chr14	35261972	+	24	GGAACGCTTGGGCTGTTGTAC	P1P2	-83	0.975535	0.2625	0.0205686
AQR	chr14	35261806	-	23	GATCTTCTTGGGCTGCGCAG	P1P2	83	0.966807	1.63913	0.654394
AQR	chr14	35262022	-	24	GGAAGCGGAATGGCGTGTAGC	P1P2	-133	0.0123417	0.225	0.135371
AQR	chr14	35262035	-	23	GTGTAGCCGGAAGTTCATGC	P1P2	-146	0.772438	0.204348	0.334303
AQR	chr20	35262041	-	24	GCCGGAAGTTCATGCAGGCGT	P1P2	-152	0.530581	0.2	0.0254398
ARGLU1	chr20	107220262	+	22	GAGCGTCTCCCGGAAGGAT	P1P2	193	1.24194	0	0.121575
ARGLU1	chr20	107220267	+	24	GCGGTTAGAGCGTCTCCCGGA	P1P2	188	0.796068	0	0.164255
ARGLU1	chr20	107220302	+	23	GAGGGGAACTGGCCGCGTGA	P1P2	153	0.0316725	0.0913044	0.0989103
ARGLU1	chr20	107220364	+	24	GGCCGACACCTTTCTTTCCTC	P1P2	91	0.00177854	1.09167	0.21653
ARGLU1	chr20	107220436	+	24	GCGCTACGGGTTTCTCGTTGG	P1P2	19	0.709497	0	0.0145586
ARGLU1	chr20	107220249	-	23	GCTTGGAGCGGGACGAGCTC	P1P2	206	0.961988	0.0521739	0.398354
ARGLU1	chr20	107220300	-	24	GACGCTCTAACCGCTCGCCTC	P1P2	155	0.0658188	0	0.0146029
ARGLU1	chr20	107220363	-	21	GGGCTGGCGGTTCTACCG	P1P2	92	0.0294472	0.880952	0.194426
ARGLU1	chr20	107220432	-	23	GGCGTCTACAGCTGCCACGA	P1P2	23	0.382974	0	0.0585681
ARGLU1	chr3	107220539	-	23	GCGCGAAACGTGCCGAAGCG	P1P2	-84	-0.0478682	0.221739	0.350922
ARHGAP11A	chr3	32907642	+	25	GAAACAGCGCTCCACATCTGAT	P1P2	-87	0.260023	0.136	0.411711
ARHGAP11A	chr3	32907709	+	22	GACACCCAGAGCCACCACG	P1P2	-20	0.571366	0.0227273	0.833203
ARHGAP11A	chr3	32907686	-	25	GTTTCGCGCTGCCATTTGAGCC	P1P2	-43	-0.0150923	0.72	0.0570944
ARHGAP11A	chr3	32907726	-	23	GACCCCCCCGTGGTGGCTCT	P1P2	-3	0.374408	0.0913043	0.015602
ARHGAP11A	chr3	32907738	-	24	GGTGGCTCTGGGTGTCTGCGG	P1P2	9	0.546309	0	0.0588905
ARHGAP11A	chr3	32907747	-	24	GGGTGTCTGCGGAGGAGCTGG	P1P2	18	1.80183	0	0.238828
ARHGAP11A	chr3	32907760	-	27	GGAGGAGCTGGGGGCGGAAGCATG	P1P2	31	0.108045	0	0.0133647
ARHGAP11A	chr3	32907767	-	23	GGGCGGAAGCATGAGGCTAA	P1P2	38	0.564294	0.02	0.146298
ARHGAP11A	chr3	32907887	-	24	GCTACCAGCCCGGGCGGGCAC	P1P2	158	0.626809	0	0.119177
ARHGAP11A	chr6	32907936	-	24	GGCTGGTCCGGCGGCCAGGCT	P1P2	207	0.413789	0	0.0327276
ASCC3	chr6	101328943	+	24	GTGATGGGAAACGCGTGAGCC	P1P2	248	0.0116625	0.075	0.0620866
ASCC3	chr6	101329095	+	24	GCGACCCCGGCAAGCGCGGCT	P1P2	96	0.414559	0.325	0.0120035
ASCC3	chr6	101329230	+	24	GACGTTGGCGCTGCAGCGGGG	P1P2	-39	0.644772	0	0.581802
ASCC3	chr6	101329235	+	24	GTGCCGACGTTGGCGCTGCAG	P1P2	-44	0.130796	0	0.162229
ASCC3	chr6	101329246	+	24	GACGAGTCGACGTGCCGACGT	P1P2	-55	0.80558	0	0.121566
ASCC3	chr6	101329065	-	23	GCAGGGCCAAAGATGCGAGC	P1P2	126	0.469167	0.226087	0.469529
ASCC3	chr6	101329131	-	24	GCCGGGGTCGCGCCCAGTCAC	P1P2	60	0.579923	0.3375	0.0218975
ASCC3	chr6	101329188	-	23	GACGCAAAGACGCACAGACC	P1P2	3	1.01868	0	0.145938
ASCC3	chr6	101329197	-	24	GACGCACAGACCCGGCGAGGA	P1P2	-6	1.17574	0	0.10808
ASCC3	chr10	101329277	-	23	GCACGTCGACTCGTCGACTC	P1P2	-86	0.0256021	0	0.153663
ATF5	chr10	50431995	+	24	GCTGACTCTGAGAAACCCTCG	P1P2	-473	0.423553	1.4875	0.247665
ATF5	chr10	50432215	+	23	GCCCTCTCCTTGTGGCTCCG	P1P2	-253	0.634968	1.39565	0.42749
ATF5	chr10	50432223	+	24	GGGGATCCAGCCCTCTCCTTG	P1P2	-245	0.611316	1.75833	0.215394
ATF5	chr10	50432352	+	24	GGCCCCAACCGGGAGGCAGCC	P1P2	-116	-0.0178605	0	0.120945
ATF5	chr10	50432363	+	23	GCCCTCGCGCGGCCCCAACC	P1P2	-105	1.06401	0	0.0669169
ATF5	chr10	50432417	+	23	GACAGATATATACTGGGTGG	P1P2	-51	0.28773	0.2	0.286449
ATF5	chr10	50432424	+	23	GACTGGGGACAGATATATAC	P1P2	-44	1.15117	0.2	0.105431
ATF5	chr10	50432513	+	22	GCCATGGCCGGGGCTACGC	P1P2	45	0.770116	0.1	0.0609636
ATF5	chr10	50432549	+	24	GAGACGGGCCGGGGGCACAAA	P1P2	81	0.628279	0.195833	0.186929
ATF5	chr3	50432605	+	24	GCGGCCTCGGCTGAAGAAAGA	P1P2	137	0.322187	0.895833	0.0717712
ATF5	chr3	50431963	-	25	GccaTCCTGGCAGGTCTGTATT	P1P2	-505	0.120839	0.132	0.0769214
ATF5	chr3	50432027	-	25	GTTTCTCAGAGTCAGCAGCTGG	P1P2	-441	0.180104	1.492	0.202339
ATF5	chr3	50432071	-	23	GGCAGGAAATTCTGCAAGCA	P1P2	-397	-0.00213523	1.49565	0.0461455
ATF5	chr3	50432100	-	24	GAAAGAGAAATGAACTGGTGC	P1P2	-368	0.0406812	1.04167	0.0548481
ATF5	chr3	50432107	-	25	GAAATGAACTGGTGCAGGTCTG	P1P2	-361	0.0100479	0.904	0.17817
ATF5	chr3	50432120	-	25	GCAGGTCTGCGGGAAGAGAATG	P1P2	-348	0.45751	0.636	0.220269
ATF5	chr3	50432230	-	25	GAAACCAGACCCCGGAGCCACA	P1P2	-238	0.50435	1.016	0.257763
ATF5	chr3	50432383	-	25	GCCTCCCGGTTGGGGCCGCGCG	P1P2	-85	-0.015106	0	0.0573757
ATF5	chr3	50432398	-	26	GCCGCGCGAGGGCGGGGCGCGGA	P1P2	-70	0.0277357	0.00384615	0.0122657
ATF5	chr3	50432405	-	24	GGGCGGGGCGCGGAAGGATCC	P1P2	-63	0.784816	0.0333333	0.00531972
ATP5J2	chr3	99057858	+	25	GAAAGGATGCCATATGTGTTAC	P1P2	5911	-0.0158792	1.524	0.00820239
ATP5J2	chr3	99057877	+	27	GCATAGTTGAAGCAGTGGCAGGAA	P1P2	5892	0.0112613	1.77778	0.106815
ATP5J2	chr3	99057977	+	26	GTATAGACTCAGTCTTAAAATAG	P1P2	5792	-0.00916844	2.30385	0.0277601
ATP5J2	chr3	99058037	+	24	GCTGTTACTCAGACGTCCTGT	P1P2	5732	0.0027467	3.26667	0.432802
ATP5J2	chr3	99058076	+	24	GCTTTTTTCGAGACCCTTTTC	P1P2	5693	-0.0469047	1.99167	0.0303985
ATP5J2	chr3	99063489	+	23	GGGCACGCGCTTCTGGGCCT	P1P2	280	-0.0439832	0.304348	0.10144
ATP5J2	chr3	99063510	+	24	GCGTGGAGGGTGAAGGCATCT	P1P2	259	0.509542	0	0.00644296
ATP5J2	chr3	99063524	+	24	GCCAACCGGGTTAGGCGTGGA	P1P2	245	0.784796	0	0.0880419
ATP5J2	chr3	99063533	+	22	GGCCTGCGCCAACCGGGTT	P1P2	236	0.799453	0	0.0491629
ATP5J2	chr3	99057911	-	27	GCCACTGCTTCAACTATGCAATAA	P1P2	5858	0.0182504	1.89259	0.0255907
ATP5J2	chr3	99057934	-	24	GTGCATAATGCAATTACACAG	P1P2	5835	-0.0712319	2.1	0.724791
ATP5J2	chr3	99058044	-	24	GGGACAGCTTTATTAACCAAC	P1P2	5725	-0.0748647	2.6	0.376421
ATP5J2	chr3	99058067	-	25	GGACGTCTGAGTAACAGCTTGC	P1P2	5702	-0.0257712	3.292	0.114172
ATP5J2	chr3	99058109	-	24	GTCTCGAAAAAAGCAGTAACG	P1P2	5660	-0.0265041	1.57083	0.490201
ATP5J2	chr17	99063580	-	24	GGGCAGCAGGAAGGCGCGCCT	P1P2	189	0.367187	0.00416667	0.061477
ATP5J2	chr17	99063615	-	24	GGGTCTGGCGCGCCTCAAGTG	P1P2	154	0.901426	0.1	0.32287
ATP5J2	chr17	99063640	-	23	GTGGCGAAGTGCCTGAGCAA	P1P2	129	0.0528992	0.304348	0.0428424
ATP5J2	chr17	99063645	-	23	GAAGTGCCTGAGCAAAGGGC	P1P2	124	0.377701	0.586957	0.346036
ATP5J2	chr17	99063736	-	23	GGAGTCCAAACAGCCTTACC	P1P2	33	1.29912	0.134783	0.0415857
ATP5J2	chr17	99063791	-	24	GAGTCCTGGTGTCCGCTGTGC	P1P2	-22	0.0225153	0.075	0.0962076
ATP6V1G1	chr17	117350079	+	22	GAGCAAGGCAAGCGGCCTA	P1P2	-32	1.55127	0	0.0170694
ATP6V1G1	chr17	117350093	+	24	GCGGCAGCGATTCTGAGAGCA	P1P2	-18	0.709911	0	0.0545651
ATP6V1G1	chr17	117350256	+	24	GCCTAATCTACCCACCACCTG	P1P2	145	0.409164	0.0583333	0.272341
ATP6V1G1	chr17	117350280	+	23	GCCCGCACCCCGCAGTTTTT	P1P2	169	-0.0658798	0.0608696	0.064974
ATP6V1G1	chr22	117350003	-	24	GCTGTGCGGTCACGTGACAAC	P1P2	-108	0.0510725	0.00833333	0.126427
ATP6V1G1	chr22	117350045	-	23	GAGCAAGCGCAGATTGTGGG	P1P2	-66	0.489778	0	0.678215
ATP6V1G1	chr22	117350067	-	24	GGCTGTGTCAGCTGACCCAAG	P1P2	-44	0.738818	0	0.537929
ATP6V1G1	chr22	117350190	-	23	GGCAGCCGAGAAGGTGTCCG	P1P2	79	0.247067	2.07826	0.492706
ATP6V1G1	chr22	117350255	-	24	GCGAGTCGAAGAAAGACCGCT	P1P2	144	0.502643	0.108333	0.61694
ATP6V1G1	chr22	117350322	-	24	GGGCGTGCGTATAGTCGCGGA	P1P2	211	0.301805	0.170833	0.247569
ATXN10	chr22	46067637	+	24	GCGGAAGTTCTGGGTGAGAGC	P1P2	-134	0.0299688	0	0.161742
ATXN10	chr22	46067648	+	22	GGGGGCGCGGCGGAAGTTC	P1P2	-123	0.0357027	0	0.00822599
ATXN10	chr22	46067668	+	24	GcggAAGTCCCGCCTGAGGGG	P1P2	-103	-0.0499325	0	0.243614
ATXN10	chr22	46067700	+	24	GAGGAGAcggcgccgcggggg	P1P2	-71	0.0252779	0	0.228992
ATXN10	chr22	46067720	+	23	GACTCGCCTCAGGCGGGAGG	P1P2	-51	0.926185	0	0.0851498
ATXN10	chr22	46067763	+	24	GCCCTGAAGCTGCGCCGCCGC	P1P2	-8	0.118128	0	0.0450205
ATXN10	chr22	46067881	+	24	Ggaaggcgaggaggacgaagg	P1P2	110	0.569061	0.1	0.193313
ATXN10	chr1	46067906	+	24	GCTGGGTCGAGCCTGACgagg	P1P2	135	1.50475	0.025	0.0521665
ATXN10	chr1	46067924	+	24	GCCATCTTGCCGCTCACAGCT	P1P2	153	0.0201682	0	0.422816
ATXN10	chr1	46067828	-	24	GGCGGCGGTTAGGGCTGTGTA	P1P2	57	0.305847	0.129167	0.11014
B3GALT4	chr1	33245003	+	23	GCGGTCGAGGCATGCTGCGG	P1P2	49	0.913966	0	0.0374334
B3GALT4	chr1	33245016	+	23	GCAGCTGCGGACCGCGGTCG	P1P2	62	0.950973	0	0.191489
B3GALT4	chr1	33245050	+	23	GACCAGCGCACCCTGGGGGG	P1P2	96	0.209423	0.0304348	0.0899512
B3GALT4	chr1	33245073	+	24	GCGGAGGTCTGAGCGCGCGAC	P1P2	119	0.699406	0.0791667	0.0958062
B3GALT4	chr1	33245090	+	22	GACCACGCCCGGGATGCGG	P1P2	136	0.998645	0.00909091	0.189258
B3GALT4	chr1	33245100	+	24	GGGGACTTAACCGACCACGCC	P1P2	146	0.362872	0	0.145087
B3GALT4	chr18	33245154	+	22	GATCCGTAAGAGCGAAGGG	P1P2	200	0.988336	0.177273	0.861254
B3GALT4	chr18	33245176	+	24	GCATGGTGCGGCGTACTCCGA	P1P2	222	1.01302	0.625	0.182857
B3GALT4	chr18	33244894	-	24	GGGAGCGCGCAACGCGGAAGC	P1P2	-60	0.585328	0	0.0564577
B3GALT4	chr18	33244959	-	23	GTGCCGCAGTCGGCCAGCCA	P1P2	5	0.260397	0	0.130424
BAK1	chr18	33547718	+	25	GGGCAGGGAGCCTGCCGGGAGC	P1P2	288	0.351398	0.46	0.0742983
BAK1	chr18	33547736	+	27	GCAGCCCCAGCCCCAGGGTGGGGC	P1P2	270	0.260933	0.062963	0.00939227
BAK1	chr18	33547792	+	25	GCCAGGATCCCGGCAGGTAAGC	P1P2	214	0.987993	0.148	0.0467638
BAK1	chr18	33548004	+	25	GCTGATTGGAGCCGGGTGCCGC	P1P2	2	0.89594	0.048	0.0398488
BAK1	chr18	33547752	-	26	GGCAGGCTCCCTGCCCCACCCTG	P1P2	254	0.877116	0.219231	0.231292
BAK1	chr18	33547756	-	25	GCTCCCTGCCCCACCCTGGGGC	P1P2	250	0.673577	0.128	0.00967596
BAK1	chr2	33547773	-	24	GGGCTGGGGCTGCTGAGATCT	P1P2	233	0.984548	0	0.00722563
BAK1	chr2	33547780	-	24	GGCTGCTGAGATCTGGGAGGA	P1P2	226	1.02746	0	0.04246
BAK1	chr2	33547808	-	24	GACCCTTCCAGCTTACCTGCC	P1P2	198	0.543232	0.0416667	0.0468082
BAK1	chr2	33548040	-	24	GCTCCAATCAGCTCCCTCTAG	P1P2	-34	0.9139	0.0416667	0.0930859
BARD1	chr2	215674160	+	24	GTCGCGCCGCGCTCGACCGCC	P1P2	214	0.0160963	0.00833333	0.0618377
BARD1	chr2	215674198	+	23	GCCATGGAACCGGATGGTCG	P1P2	176	0.557144	0	0.441785
BARD1	chr2	215674263	+	24	GATAATCGGCAGCCGAGGAAC	P1P2	111	0.840596	0.275	0.458022
BARD1	chr2	215674278	+	23	GCGGGACGATGCCGGATAAT	P1P2	96	0.298697	0.247826	0.347998
BARD1	chr2	215674297	+	24	GAGGAGCCTTTCATCCGAAGG	P1P2	77	0.304746	0.3875	0.182616
BARD1	chr2	215674399	+	24	GGCGGCCCGCCGTCCCAGACG	P1P2	-25	1.43493	0	0.200639
BARD1	chrX	215674188	-	22	GTCGAGCGCGGCGCGACTG	P1P2	186	0.471385	0	0.0322943
BARD1	chrX	215674246	-	24	GCGCGGAACGAGGCTCGTTCC	P1P2	128	-0.128264	0	0.0153136
BARD1	chrX	215674251	-	24	GAACGAGGCTCGTTCCCGGAG	P1P2	123	0.724472	0.0208333	0.21519
BARD1	chrX	215674429	-	23	GGGACGGCGGGCCGCCAGAg	P1P2	-55	0.398716	0	0.117477
BCAS2	chrX	115124031	+	26	GTTACAATTTGCCACTTCTACCC	P1P2	187	0.20696	0.215385	0.164973
BCAS2	chrX	115124072	+	25	GCTGACTCACTGCTAGCTGGCT	P1P2	146	0.0542428	3.012	0.0777439
BCAS2	chrX	115124077	+	23	GTAGCTGACTCACTGCTAGC	P1P2	141	0.0123023	3.96087	0.45515
BCAS2	chrX	115124109	+	24	GTGTGCGGGAAGCGGTGAGTG	P1P2	109	0.703017	7.80833	0.118846
BCAS2	chrX	115124118	+	25	GAAGCCCCTGGTGTGCGGGAAG	P1P2	100	0.346839	6.672	0.0270069
BCAS2	chrX	115124220	+	25	GCAGAAAACGCAGGCAAACCTG	P1P2	-2	1.25503	0.1	0.525602
BCAS2	chr19	115124276	+	24	GATTACATCAGTGTCAGGCGC	P1P2	-58	0.109746	0.1	0.330872
BCAS2	chr19	115124282	+	24	GAACGTGATTACATCAGTGTC	P1P2	-64	0.0782516	0.1	0.0252726
BCAS2	chr19	115124028	-	25	GCTGCAGCCTAAGAAAGAGAAT	P1P2	190	1.04195	0.068	0.218675
BCAS2	chr19	115124045	-	26	GAGAATAGGGACCAGGGTAGAAG	P1P2	173	0.38286	0.1	0.139378
BCCIP	chr19	127512076	+	24	GCTTCCCCTTGCCTGACCTTC	P1P2	-54	0.0519776	0	0.0200469
BCCIP	chr19	127512151	+	24	GCTGCGGAACCCCACTTTCCA	P1P2	21	1.25376	0.0291667	0.334209
BCCIP	chr19	127512168	+	24	GACTGGGGGATCCGGCGGCTG	P1P2	38	0.00244112	0.158333	0.16341
BCCIP	chr19	127512177	+	24	GtcGCGCTGGACTGGGGGATC	P1P2	47	0.151242	0.241667	0.00248447
BCCIP	chr19	127512324	+	24	GCTTGCCAAAAAGTTTTTCTC	P1P2	194	0.0515725	0.05	0.0673938
BCCIP	chr19	127512384	+	24	GTTTCTCCTCACAGACCCTCA	P1P2	254	0.0248141	0.645833	0.564073
BCCIP	chr19	127512137	-	24	GTGAGCGGCAACATGGCGTCC	P1P2	7	0.0285655	0.0458333	0.0154191
BCCIP	chr19	127512165	-	23	GCGGCGTGCCGTGGAAAGTG	P1P2	35	1.595	0.0478261	0.129077
BCCIP	chr19	127512317	-	23	GAAGGACACGCTCCCCTAGT	P1P2	187	0.0411489	0	0.0412577
BCCIP	chr19	127512373	-	23	GGCTGTGTAAAAATAGTGTA	P1P2	243	-0.0193995	0.130435	0.597668
BCL2L1	chr19	30310182	+	25	GGAATGGAATTTTTAGGGTAAA	P1	474	-0.0591054	1.568	0.023521
BCL2L1	chr19	30310189	+	24	GGAGGGGGAATGGAATTTTTA	P1	467	-0.0096057	1.45833	0.190663
BCL2L1	chr19	30310208	+	24	GAAACCAGTTCTGGTACCTGG	P1	448	0.252225	1.29167	0.151797
BCL2L1	chr19	30310298	+	24	GGTGGGAGATTCAGAGTCCAC	P1	358	0.772614	0.0291667	0.158404
BCL2L1	chr19	30310335	+	24	GGAAGGCATTTCGGAGAAGAC	P1	321	0.805525	0.245833	0.0523738
BCL2L1	chr19	30310345	+	24	GACTTTCCGAGGAAGGCATTT	P1	311	0.616741	0.295833	0.124488
BCL2L1	chr9	30310405	+	24	GATTTGAATGTAGGTGGTGCG	P1	251	0.152236	0.158333	0.490598
BCL2L1	chr9	30310415	+	24	GCCTAAGGCGGATTTGAATGT	P1	241	0.555061	0.0875	0.344431
BCL2L1	chr9	30310527	+	24	GTTTTTTTGCCAGCCACCGCG	P1	129	-0.0156642	1.1375	0.935792
BCL2L1	chr9	30310556	+	24	GGGTCGCATGATCCCTCCGGC	P1	100	0.0847306	0.554167	0.733903
BCL2L1	chr9	30310593	+	24	GCAATTCCTGTGTCGCCTTCT	P1	63	0.227626	0.0541667	0.0144921
BCL2L1	chr9	30310654	+	24	GGCCGCCCTCGATCCGGGCGA	P1	2	0.000110432	0.1	0.215973
BCL2L1	chr9	30310660	+	22	GAGCGGCCGCCCTCGATCC	P1	-4	1.12251	0.113636	0.0135447
BCL2L1	chr9	30310696	+	23	GGGCTGGGCTCCCGGGTGGC	P1	-40	0.00287416	0.0739131	0.0172279
BCL2L1	chr9	30310250	-	24	GTTTCTTTGTGGGTCTTACGA	P1	406	0.201778	2.11667	0.440171
BCL2L1	chr9	30310262	-	24	GTCTTACGAAGGTCTGGGTCT	P1	394	0.277267	2.35417	0.0328912
BCL2L1	chrX	30310534	-	22	GGTAACTCAGCCGGCCTCG	P1	122	0.444227	0.995455	0.439765
BCL2L1	chrX	30310589	-	24	GGATCATGCGACCCGGCAGGC	P1	67	0.104392	0.245833	0.0980187
BCLAF1	chrX	136600732	+	27	Gtaagcgagaaaatgagaatgtcc	P1P2	10179	0.138811	2.28148	0.193313
BCLAF1	chrX	136600999	+	21	GATTAGGAGAAAAGAAAT	P1P2	9912	0.0294787	0.933333	0.0821708
BCLAF1	chrX	136610747	+	23	GGTGTCGGGTTGGCGGCGAA	P1P2	164	0.0563365	0.460869	0.0259425
BCLAF1	chrX	136610761	+	24	GACTCTTTTGTGGGTGGTGTC	P1P2	150	0.0219284	0.3125	0.143616
BCLAF1	chrX	136610795	+	24	GGGGCAGTGAAGACCGAGGAC	P1P2	116	0.0745992	0.6625	0.115058
BCLAF1	chrX	136610817	+	24	GCAATGTATTCAAGTTACTCC	P1P2	94	0.103217	0.9375	0.0107414
BCLAF1	chrX	136610871	+	24	GTTGCAACGGAGATAAATTCC	P1P2	40	0.390932	0.116667	0.0402557
BCLAF1	chr1	136610894	+	23	GTCGGGAAATGGCCGCTGTG	P1P2	17	1.23621	0.0608696	0.151971
BCLAF1	chr1	136610905	+	22	GCGTTCTTGAGTCGGGAAA	P1P2	6	0.578727	0.1	0.101436
BCLAF1	chr1	136610912	+	24	GTTTTCCTCGCGTTCTTGAGT	P1P2	-1	0.17049	0.1	0.163679
BCLAF1	chr1	136610946	+	23	GAGACGTGCTAGCGCGTCGA	P1P2	-35	1.18507	0.2	0.181883
BCLAF1	chr1	136600736	-	26	Gccatttactagagcttgttacc	P1P2	10175	0.0462964	2.43846	0.193313
BCLAF1	chr1	136600789	-	25	Gataacaatagatccatttcac	P1P2	10122	-0.000920986	1.804	0.193313
BCLAF1	chr1	136600816	-	27	Gttctttgagaataaaatacattt	P1P2	10095	-0.0538225	1.51852	0.193313
BCLAF1	chr1	136600818	-	22	Gagaataaaatacattttg	P1P2	10093	0.0469753	1.26364	0.193313
BCLAF1	chr1	136600993	-	28	GACCTTGAAGAATGTGATCTAGAAT	P1P2	9918	-0.0879097	1.66071	0.195156
BCLAF1	chr1	136610875	-	24	GACACGCCGAATCGCGGTTCC	P1P2	36	-0.0648774	0.375	0.0170316
BIRC5	chr11	76210254	+	24	GGAGTAGAGGCGGGGCGGCGC	P1P2	-112	0.283731	0	0.0104602
BIRC5	chr11	76210302	+	24	GTCGGGAGCGCACGCCCTCTT	P1P2	-64	0.706334	0	0.0242167
BIRC5	chr11	76210320	+	22	GCGCGCCGCGGGGCATGTC	P1P2	-46	0.739035	0	0.0100212
BIRC5	chr11	76210341	+	23	GATTCAAATCTGGCGGTTAA	P1P2	-25	0.0254817	0	0.059409
BIRC5	chr11	76210371	+	23	GCCGCCGCCACCTCTGCCAA	P1P2	5	1.21045	0	0.18432
BIRC5	chr11	76210404	+	24	GCCAGGCAGGGGGCAACGTCG	P1P2	38	1.05052	0.383333	0.11812
BIRC5	chr11	76210422	+	24	GGTCCTTGAGAAAGGGCTGCC	P1P2	56	0.113775	0.595833	0.0557838
BIRC5	chr11	76210499	+	24	GCCGGGCAGTCTCACCCGCTC	P1P2	133	0.514534	0.0583333	0.0285639
BIRC5	chr11	76210310	-	24	GCGGGGGGTGGACCGCCTAAG	P1P2	-56	0.31997	0	0.085581
BNIP1	chr11	172571521	+	24	GGGGACGCCGGCTACGGGCAG	P1P2	-30	1.00505	0.1	0.20194
BNIP1	chr17	172571534	+	24	GAGCCGCCATGTTGGGGACGC	P1P2	-17	0.00754336	0.0166667	0.0307846
BNIP1	chr17	172571667	+	23	GACCAGCAGAGCTTGGGTTA	P1P2	116	0.995066	3.42609	0.179879
BNIP1	chr17	172571753	+	21	GGGGGGGTAGCCGACCAT	P1P2	202	0.0385745	0.1	0.0165625
BNIP1	chr17	172571772	+	23	GGACACAACCAAATGGGGAC	P1P2	221	0.573967	0.1	0.124686
BNIP1	chr17	172571779	+	23	GTCACCGGGACACAACCAAA	P1P2	228	0.462604	0.130435	0.170137
BNIP1	chr17	172571537	-	24	GGTCCTGCCGCTGCCCGTAGC	P1P2	-14	0.657327	0.183333	0.0837412
BNIP1	chr17	172571551	-	22	GTAGCCGGCGTCCCCAACA	P1P2	0	0.999888	0.0409091	0.0201234
BNIP1	chr17	172571577	-	24	GCTCCCCAAGACGTCCACGTC	P1P2	26	0.845185	0.0541667	0.0462247
BNIP1	chr17	172571644	-	23	GCTTATTCAGGTACTGATCC	P1P2	93	0.280973	1.98261	0.0553072
BORA	chr17	73302018	+	23	GTCTTGGGCCAACCAGGGCA	P1P2	-55	0.0264648	0	0.232163
BORA	chr3	73302072	+	23	GCCAGGCCAGCTTCCACGAC	P1P2	-1	1.19893	0.0956522	0.0555649
BORA	chr3	73302096	+	24	GTACCGACTCCAGGGAGCTCC	P1P2	23	1.02458	0.0333333	0.0107662
BORA	chr3	73302106	+	24	GAAGCCCCCAGTACCGACTCC	P1P2	33	0.776487	0.120833	0.045055
BORA	chr3	73302206	+	24	GCGGGCAGGCAAGTCAGGAGC	P1P2	133	0.146494	0.254167	0.00927007
BORA	chr3	73302295	+	23	GCGTCGCCCCCAACCCTACG	P1P2	222	0.283779	0.221739	0.345224
BORA	chr3	73302055	-	24	GCCCAAGACAGCGCGGAAGCG	P1P2	-18	0.0647532	0	0.267539
BORA	chr3	73302170	-	22	GTACGCTCTTTGTGGTCCC	P1P2	97	0.060662	0.672727	0.0495969
BORA	chr3	73302247	-	24	GCCCGCTCGCCCCTGGTGAAT	P1P2	174	0.588843	0.129167	0.0218036
BORA	chr3	73302308	-	24	GAAAGAGTGGCCACGTAGGGT	P1P2	235	0.0750124	0.125	0.00756573
BPGM	chr3	134331611	+	24	GCCAAAGAGCCAGCGCCTCCT	P1P2	-4	0.770855	0.158333	0.104501
BPGM	chr3	134331789	+	24	GACTCCCACCAACGACTAAAC	P1P2	174	0.475251	2.05	0.154472
BPGM	chr3	134331819	+	24	GTCCCAGCTTGAGGGCTGGAG	P1P2	204	0.531199	0.420833	0.0228186
BPGM	chr3	134331565	-	24	GCCCTAGGACCTGCCCACGTC	P1P2	-50	0.994141	0.5125	0.0113855
BPGM	chr3	134331571	-	24	GGACCTGCCCACGTCTGGTTC	P1P2	-44	0.586266	0.45	0.0146391
BPGM	chr3	134331596	-	24	GCTAGAAAAGAGCGTCGATGC	P1P2	-19	1.04066	0.158333	0.124872
BPGM	chr3	134331619	-	24	GCGGCAGTGATGAGTCCTAGG	P1P2	4	0.821521	0.1875	0.330102
BPGM	chr3	134331625	-	24	GTGATGAGTCCTAGGAGGCGC	P1P2	10	0.820275	0.191667	0.228249
BPGM	chr3	134331644	-	24	GCTGGCTCTTTGGCGGCTCGG	P1P2	29	0.965198	0.208333	0.08081
BPGM	chr3	134331766	-	24	GATGTTTTATTTTTGGGTGCG	P1P2	151	-0.0792192	0.929167	0.0396813
BRCA1	chr3	41277087	+	23	GAAGCGCTGAGGATCAGGAA	P1P2	285	0.366404	1.93043	0.274088
BRCA1	chr4	41277098	+	25	GTAGGTCGCGAGGGAAGCGCTG	P1P2	274	0.192323	1.48	0.336374
BRCA1	chr4	41277137	+	24	GCGTAAGGCGTTGTGAACCCT	P1P2	235	0.48386	0.120833	0.105924
BRCA1	chr4	41277175	+	24	GGTATTCTTTGACGGGGGGTA	P1P2	197	-0.0259456	0.341667	0.216932
BRCA1	chr4	41277184	+	23	GACAGATGGGTATTCTTTGA	P1P2	188	0.085102	0.443478	0.0277488
BRCA1	chr4	41277197	+	24	GGATTTCCGAAGCTGACAGAT	P1P2	175	0.330075	0.6125	0.146631
BRCA1	chr4	41277227	+	23	GATGCTCTGGGGTACTGGCG	P1P2	145	0.0739681	1.53043	0.289708
BRCA1	chr4	41277239	+	23	GGGGGCCCAAGTGATGCTCT	P1P2	133	0.193272	1.72609	0.0125851
BRCA1	chr4	41277271	+	24	GGGTAAAGGTAGTAGAGTCCC	P1P2	101	0.725629	1.87917	0.245195
BRCA1	chr4	41277361	+	24	GCTCGCTGAGACTTCCTGGAC	P1P2	11	1.79051	0.241667	0.00503462
BRCA2	chr4	32889713	+	24	GTCCCCTCACGCTTCTCCCGG	P1P2	60	0.754098	0.25	0.414272
BRCA2	chr12	32889772	+	24	GAGGTGCAGTTCTTTTTTGGC	P1P2	119	0.10321	0.05	0.25592
BRCA2	chr12	32889592	-	23	GTGTGCTGCGTGTCGCGTCA	P1P2	-61	0.043535	0.0521739	0.249668
BRCA2	chr12	32889602	-	24	GTGTCGCGTCACGGCGTCACG	P1P2	-51	0.0828735	0.0916667	0.566176
BRCA2	chr12	32889639	-	22	GGCGCGAGCTTCTGAAACT	P1P2	-14	1.28029	0	0.1144
BRCA2	chr12	32889750	-	24	GTGAGGGGACAGATTTGTGAC	P1P2	97	0.965616	0.3	0.37577
BRCA2	chr12	32889755	-	24	GGGACAGATTTGTGACCGGCG	P1P2	102	-0.0406187	0.3	0.622152
BRCA2	chr12	32889775	-	24	GCGGTTTTTGTCAGCTTACTC	P1P2	122	0.0252504	0.170833	0.20884
BRCA2	chr12	32889869	-	22	GTCCCAGTCCAGCGTGGCG	P1P2	216	0.547918	0.122727	0.395713
BRCA2	chr12	32889887	-	24	GCGGGGGAGCGCCTCACGCCC	P1P2	234	0.416423	0.25	0.0475802
BRE	chr12	28113671	+	24	GATCGGTAACCGGCGACTACG	P1P2	-13	0.557649	0.1375	0.212221
BRE	chr12	28113682	+	24	GAACTTAGTCCGATCGGTAAC	P1P2	-2	0.825646	0.229167	0.203937
BRE	chr12	28113689	+	24	GTACCTGGAACTTAGTCCGAT	P1P2	5	0.389569	0.345833	0.548952
BRE	chr12	28113866	+	23	GCCTTGGGGGCTCGTTCTTG	P1P2	182	0.187473	0.913043	0.00453283
BRE	chr12	28113635	-	24	GCCCGCGGCGCGCGCGCAGGT	P1P2	-49	0.486788	0	0.140455
BRE	chr12	28113647	-	23	GCGCAGGTCGGTGCGTCTGT	P1P2	-37	0.326636	0	0.162224
BRE	chr4	28113660	-	24	GCGTCTGTCGGGGGCGCGCTC	P1P2	-24	1.02831	0	0.0310528
BRE	chr4	28113685	-	26	GTACCTGTACCCCACGTAGTCGC	P1P2	1	0.53486	0.0923077	0.196916
BRE	chr4	28113758	-	22	GTTGGATCCCGAGTCGCAC	P1P2	74	0.194799	0.618182	0.414528
BRE	chr4	28113815	-	24	GGGACTCGCCTCCTCTTCCTA	P1P2	131	1.14604	0.0791667	0.216704
BRIP1	chr4	59940616	+	24	GTCGGAGGGAAGTCCACGGAA	P1P2	214	1.07499	0.491667	0.0377734
BRIP1	chr4	59940621	+	24	GGCAAGTCGGAGGGAAGTCCA	P1P2	209	0.539566	0.533333	0.31934
BRIP1	chr4	59940838	+	24	GTTGAGGGGTCTGGTGGGTCG	P1P2	-8	1.0125	0.6	0.147422
BRIP1	chr4	59940861	+	23	GGAATTCGTCTCGGGTTGTG	P1P2	-31	0.732299	0.143478	0.276239
BRIP1	chr4	59940870	+	24	GCGGGAGGCGGGAATTCGTCT	P1P2	-40	0.614394	0.1	0.045891
BRIP1	chr4	59940896	+	24	GCTATTGGGCGCTGGGAGTCG	P1P2	-66	0.199323	0.1	0.0752041
BRIP1	chr11	59940905	+	24	GCTCGCTGGGCTATTGGGCGC	P1P2	-75	0.510429	0.1	0.00591757
BRIP1	chr11	59940626	-	24	GAAGAACTCAAGCCCTTTCCG	P1P2	204	0.649757	0.483333	0.474099
BRIP1	chr11	59940732	-	24	GACTTCTGAGAGCAAATAAAG	P1P2	98	0.912509	0.358333	0.689582
BRIP1	chr11	59940740	-	23	GAGCAAATAAAGCGGAGCCC	P1P2	90	0.572646	0.456522	0.485324
BUB3	chr11	124913901	+	24	GAACACTCGCAGGCTAGGCGA	P1P2	-26	0.596614	0.0916667	0.173042
BUB3	chr11	124913995	+	24	GTCGCCTCGCCTCCCTACCTT	P1P2	68	0.883122	0.1	0.152906
BUB3	chr11	124914049	+	23	GCCCTGCCAGTTGCGGACCC	P1P2	122	0.0216224	0.204348	0.128386
BUB3	chr11	124914071	+	22	GGATCCCCTGCGAATCGAA	P1P2	144	0.0141811	0.1	0.577693
BUB3	chr11	124913938	-	24	GCGAGTGTTCTGAGGGAAGCA	P1P2	11	0.674309	0.0375	0.288851
BUB3	chr11	124913973	-	24	GCCGCAGCGAGTGGCGAGTAG	P1P2	46	1.44257	0	0.197535
BUB3	chrX	124913990	-	24	GTAGTGGAAACGTTGCTTCTG	P1P2	63	0.0833004	0.0208333	0.00795424
BUB3	chrX	124914034	-	24	GAGGCGACGGTGTGCGGGAGC	P1P2	107	0.0664379	0.154167	0.00418113
BUB3	chrX	124914065	-	24	GGGACTTCCCGGGTCCGCAAC	P1P2	138	0.160449	0.3	0.0870041
BUB3	chrX	124914086	-	22	GCAGGGCCGTTCGATTCGC	P1P2	159	-0.0269291	0.1	0.0503157
C11orf30	chrX	76156024	+	23	GCCGCGCGCGGCCAGTCGGG	P1P2	-75	0.789112	0.234783	0.396683
C11orf30	chrX	76156057	+	24	GCAAGATGGCGACAGGTAACA	P1P2	-42	0.201837	0.220833	0.516592
C11orf30	chrX	76156277	+	24	GATCCCGTTAGGAAACAACGG	P1P2	178	0.513236	0.0708333	0.850282
C11orf30	chrX	76156289	+	22	GGAGCCCCACGATCCCGTT	P1P2	190	0.537578	0.0227273	0.304573
C11orf30	chrX	76156311	+	23	GAGTCCCCCTGAGTCCACCC	P1P2	212	0.43865	0.317391	0.313992
C11orf30	chrX	76158002	+	28	GCATTCATCCCTGCTGAGATCCAGA	P1P2	1903	-0.100116	1.09643	0.510225
C11orf30	chr15	76158100	+	28	GcaaacagctatgacctagGCAGAA	P1P2	2001	0.0890271	1.18214	0.0958808
C11orf30	chr15	76158177	+	25	Gggaaacaacaatgagtaagat	P1P2	2078	-0.0312014	1.064	0.193313
C11orf30	chr15	76156138	-	24	GGTGTCCCCTAGTCTTGGCGG	P1P2	39	0.486938	0.0125	0.452465
C11orf30	chr15	76156176	-	24	GCCCCGAAAGGCCGGGCAGGT	P1P2	77	1.59321	0.945833	0.0152068
C11orf30	chr15	76156306	-	22	GTTTCCTAACGGGATCGTG	P1P2	207	0.39543	0.0454545	0.584483
C11orf30	chr15	76156319	-	23	GATCGTGGGGCTCCCCGGGG	P1P2	220	0.306872	0.0434783	0.0122676
C11orf30	chr15	76156327	-	24	GGGCTCCCCGGGGTGGACTCA	P1P2	228	0.239978	0.145833	0.0156496
C11orf30	chr15	76157960	-	28	GTTCTGGTAGGGAGGACAAGCTCTT	P1P2	1861	0.617674	0.842857	0.172336
C11orf30	chr15	76157961	-	24	GGTAGGGAGGACAAGCTCTTT	P1P2	1862	0.103163	0.883333	0.0305678
C11orf30	chr15	76158009	-	26	GCCTGTTGTGTGGCCAACCCTTC	P1P2	1910	0.182691	2.11538	0.0404404
C11orf30	chr15	76158021	-	26	GCCAACCCTTCTGGATCTCAGCA	P1P2	1922	-0.134639	1.52308	0.731924
C11orf30	chr15	76158051	-	24	GCAAAAGAATTCTTCGAAAAT	P1P2	1952	-0.0651702	0.579167	0.0169109
C11orf30	chr15	76158113	-	27	GATACCTTTTTTCCCTTTCTGCct	P1P2	2014	-0.0175291	0.948148	0.448645
C11orf30	chr15	76158131	-	25	GCctaggtcatagctgtttgca	P1P2	2032	-0.161434	1.304	0.178098
C14orf178	chr11	78227267	+	24	GTCGAAGCTGGGGTCTTTCAG	P1P2	328	0.726537	0	0.533764
C14orf178	chr11	78227279	+	23	GACTAGGCCTAGTCGAAGCT	P1P2	340	0.582208	0	0.0938051
C14orf178	chr11	78227416	+	24	GGTCCTCGATACGGAAGGGTC	P1P2	477	0.64911	0.108333	0.0139892
C14orf178	chr11	78227426	+	23	GTTGATTGGGGTCCTCGATA	P1P2	487	1.03215	0.1	0.0718281
C14orf178	chr11	78227311	-	24	GACTAGGCCTAGTCGTAGCGG	P1P2	372	0.994945	0	0.66885
C14orf178	chr11	78227340	-	22	GAGGGCGTAGCCGTAGTCT	P1P2	401	0.0984695	0.195455	0.0389058
C14orf178	chr11	78227363	-	24	GCCCACGTCATTCTGTGCCCC	P1P2	424	-0.0048447	0.708333	0.0292419
C14orf178	chr11	78227368	-	23	GTCATTCTGTGCCCCGGGTC	P1P2	429	0.165111	0.930435	0.0115811
C14orf178	chr11	78227379	-	24	GCCCCGGGTCAGGTCACCGCC	P1P2	440	0.249383	1.32083	0.213043
C14orf178	chr11	78227459	-	24	GACCCCAATCAACAACCCACC	P1P2	520	0.972905	0.133333	0.378687
C15orf41	chr11	36871782	+	24	GCAGCCGCAGTGGTGCGCCGA	P1P2	-90	0.0586055	0.2	0.00712515
C15orf41	chr11	36871814	+	24	GTACACCAGAGTGCCCTAGCT	P1P2	-58	0.04705	0.320833	0.0764793
C15orf41	chr11	36872010	+	25	GGAACAAGGAAAAAACACCCTG	P1P2	138	0.707006	0.416	0.329315
C15orf41	chr11	36872026	+	26	GGGACCAGGAGGTGGCGGGAACA	P1P2	154	0.0500755	0.288462	0.00789508
C15orf41	chr11	36872033	+	25	GGGCCAGGGACCAGGAGGTGGC	P1P2	161	0.450246	0.38	0.0502348
C15orf41	chr13	36872043	+	25	GTATCATGTTGGGCCAGGGACC	P1P2	171	0.52327	0.528	0.0215988
C15orf41	chr13	36872049	+	24	GGTCAGTATCATGTTGGGCCA	P1P2	177	0.213009	0.579167	0.608469
C15orf41	chr13	36872055	+	23	GCTTTGGTCAGTATCATGTT	P1P2	183	1.15071	0.595652	0.290184
C15orf41	chr13	36872071	+	25	GCTATCTCGTCGTACTGAGCTT	P1P2	199	0.7304	0.536	0.404674
C15orf41	chr13	36872218	+	23	GTTCCTAAGCGCTGCCTGGG	P1P2	346	0.579355	1.02609	0.0742714
C15orf41	chr13	36871823	-	24	GGCTGCTCAGTAAGCCAAGCT	P1P2	-49	1.11889	0.2	0.115533
C15orf41	chr13	36872260	-	24	GAACCACGTGTCACACATGAG	P1P2	388	-0.0592277	0.975	0.214135
C15orf41	chr13	36872296	-	24	GTGTCAGGCGTTAGGAGGTCG	P1P2	424	0.248717	0.2625	0.398796
C15orf57	chr13	40856988	+	23	GTTCTGGACGCCCTGCCCTG	P1P2	197	-0.0688859	0.4	0.19524
C15orf57	chr13	40857038	+	24	GAGACCTGAGCGACTGAGGCC	P1P2	147	0.155256	0.370833	0.0557071
C15orf57	chr15	40857091	+	23	GAATACCACATAGAGGCCTT	P1P2	94	0.416167	1.08696	0.0561872
C15orf57	chr15	40857098	+	23	GGCCCCGGAATACCACATAG	P1P2	87	0.899825	1.03043	0.360295
C15orf57	chr15	40857164	+	23	GGCAGCTGTTACGGTAAGTG	P1P2	21	1.03153	0.3	0.117579
C15orf57	chr15	40857173	+	24	GCGTTTACTGGGCAGCTGTTA	P1P2	12	0.972931	0.283333	0.108351
C15orf57	chr15	40856980	-	23	GCTCACACCAGAGCCCCGCA	P1P2	205	0.995538	1.03913	0.572625
C15orf57	chr15	40857018	-	24	GCAGGGCGTCCAGAACCACGC	P1P2	167	0.972296	0.333333	0.164241
C15orf57	chr15	40857089	-	24	GCTGTCTGGACGGGATGAATC	P1P2	96	0.700882	1.2875	0.0539187
C15orf57	chr15	40857097	-	24	GACGGGATGAATCAGGTCCCA	P1P2	88	0.27482	1.3125	0.125062
C7orf26	chr15	6629646	+	23	GCCGAACAGCGGCCGAATGC	P1P2	-22	0.989242	0	0.0594653
C7orf26	chr15	6629704	+	23	GGCGCCCGAAGGTCCGACTG	P1P2	36	1.02175	0	0.182287
C7orf26	chr12	6629753	+	24	GCCTGCTCCCTGCCTGCTCAG	P1P2	85	0.720272	0	0.326849
C7orf26	chr12	6629816	+	23	GAAACAAAGAGGCGCGACCC	P1P2	148	0.700642	0	0.0248642
C7orf26	chr12	6629629	-	24	GCGGCCTGCGCTTGGCCCCTG	P1P2	-39	0.989013	0	0.0732371
C7orf26	chr12	6629649	-	24	GCGGGCCGCCGTCTCCGTGCC	P1P2	-19	0.572667	0	0.0312065
C7orf26	chr12	6629713	-	24	GGCTCCTGGCGGCGCCGCAGT	P1P2	45	0.632433	0	0.195609
C7orf26	chr12	6629721	-	24	GCGGCGCCGCAGTCGGACCTT	P1P2	53	0.830138	0	0.0519589
C7orf26	chr12	6629736	-	24	GACCTTCGGGCGCCTGCTGGC	P1P2	68	0.017268	0	0.0385491
C7orf26	chr12	6629894	-	24	GGAAGTGAGACGCGCTcggcg	P1P2	226	0.449773	0	0.288836
CAD	chr12	27440253	+	23	GTAGGAGCCTCGGGCGCGCT	P1P2	-27	1.15754	0	0.0821175
CAD	chr12	27440310	+	24	GGAGTCGGTCCACGTGGCTAA	P1P2	30	0.648953	0.120833	0.39507
CAD	chr15	27440356	+	24	GGGAAGGACTGCAAACTCCAC	P1P2	76	0.64984	0.0916667	0.192975
CAD	chr15	27440373	+	24	GGCGAGTACGGAGAAGCGGGA	P1P2	93	1.19262	0.0125	0.351803
CAD	chr15	27440464	+	23	GTCGACACGGCGGCCCCAAA	P1P2	184	0.415712	0.343478	0.310403
CAD	chr15	27440510	+	24	GATAAGGTCTGCAGCCTAACC	P1P2	230	0.549594	0.1875	0.239575
CAD	chr15	27440527	+	24	GGCGCATCACAGAGTGGGATA	P1P2	247	0.341285	0.1	0.033483
CAD	chr15	27440324	-	23	GCCCCGCGCCGTTAGCCACG	P1P2	44	0.252908	0.026087	0.597284
CAD	chr15	27440471	-	24	GGTCCTGCGGGGCCAGCCCTT	P1P2	191	0.056904	0.495833	0.0157445
CAD	chr15	27440493	-	24	GGGGCCGCCGTGTCGACTGCC	P1P2	213	-0.0125709	0.295833	0.0500154
CARS2	chr15	111358215	+	24	GCGCACGCCGAAGCCGCCTCC	P1P2	211	0.0783237	0	0.0216125
CARS2	chr15	111358238	+	23	GAGGAAGGAACCCCTAATCG	P1P2	188	0.379079	0	0.179802
CARS2	chr12	111358261	+	24	GCAGGTGTACAACAGCCTCAC	P1P2	165	0.21374	0	0.0231201
CARS2	chr12	111358409	+	24	GGACTACGCGCGGCCCAGGCC	P1P2	17	0.125995	0	0.00750383
CARS2	chr12	111358420	+	23	GACATGTTGAGGACTACGCG	P1P2	6	0.750867	0	0.817617
CARS2	chr12	111358250	-	21	GGCGTGCGCCACGATTAG	P1P2	176	0.765558	0	0.139928
CARS2	chr12	111358465	-	22	GCGGCCAGCGCCTACGACT	P1P2	-39	1.21814	0	0.0217529
CARS2	chr12	111358474	-	24	GCGCCTACGACTGGGCGGAGA	P1P2	-48	0.768942	0	0.0356482
CARS2	chr12	111358486	-	24	GGGCGGAGACGGGAGCCACGC	P1P2	-60	1.01291	0	0.056519
CARS2	chr12	111358517	-	24	GCCGGTCGCTCAAGAGCAGCA	P1P2	-91	-0.0199872	0	0.330222
CARS	chr12	3078453	+	24	GGCCCGGGTGCATGGGTTCTG	P1P2	163	0.264614	0.0916667	0.0463528
CARS	chr12	3078469	+	24	GTCCTTATGTCTGAGGGGCCC	P1P2	147	0.0498872	0.15	0.0549305
CARS	chr11	3078475	+	22	GCGAGTCCTTATGTCTGAG	P1P2	141	0.113751	0.145455	0.207137
CARS	chr11	3078500	+	24	GGCGCTGGGTGCTCGGCTCGA	P1P2	116	0.0243955	0.1	0.0424718
CARS	chr11	3078638	+	24	GCGGCGGTTGCATCAGATTCT	P1P2	-22	0.702551	0	0.0509071
CARS	chr11	3078661	+	23	GGCGTGGGGCGCGACTTCCG	P1P2	-45	0.190955	0.0434783	0.0825342
CARS	chr11	3078688	+	24	GACCGGGCGTGTCCCGGAAGA	P1P2	-72	0.0512393	0.266667	0.0667724
CARS	chr11	3078441	-	24	GCACTGCCGCCCCTCAGACCA	P1P2	175	0.385464	0	0.293158
CARS	chr11	3078586	-	24	GCCGCTCACCCTGCTGCCCGG	P1P2	30	1.08502	0	0.482103
CARS	chr11	3078625	-	24	GGAATCCCGGACCCGCAGCTG	P1P2	-9	1.21243	0	0.0455952
CASP8AP2	chr11	90539719	+	24	GGGGCAGCCGACCTCCACTCG	P1P2	81	0.0291107	0.775	0.0569424
CASP8AP2	chr11	90539782	+	24	GCGGCCCTTCCCCGACCTACT	P1P2	144	0.639433	0.0291667	0.0943785
CASP8AP2	chr17	90539845	+	23	GCAAGCCCTGAAGCTGCACC	P1P2	207	0.0981103	0.0782609	0.285927
CASP8AP2	chr17	90539869	+	24	GAAGGACCACAGAGGGACGCA	P1P2	231	1.09222	0.516667	0.439234
CASP8AP2	chr17	90539878	+	24	GACCCTCTCGAAGGACCACAG	P1P2	240	0.653397	0.583333	0.224634
CASP8AP2	chr17	90539639	-	23	GAAAGGAACCGGGTTGTCTT	P1P2	1	1.07117	0.0173913	0.0993765
CASP8AP2	chr17	90539735	-	24	GGTAGTCCCCCGAGTGGAGGT	P1P2	97	0.32589	1.1125	0.639504
CASP8AP2	chr17	90539800	-	23	GCGGCCAAGTAGGTCGGGGA	P1P2	162	0.836607	0.0608696	0.0171056
CASP8AP2	chr17	90539818	-	24	GGAAGGGCCGCGCCTGACGTC	P1P2	180	0.6562	0	0.0560573
CASP8AP2	chr17	90539908	-	24	GGTCCTTCGAGAGGGTCTGGG	P1P2	270	0.0921866	0.55	0.294281
CBFA2T3	chr17	89007521	+	23	GCGCAGCCGCCCCTGAGTCG	P1	194	0.0211268	0	0.234298
CBFA2T3	chr6	89007558	+	24	GccgcgcgccTGAGCCCGGTG	P1	157	0.00565474	0	0.271177
CBFA2T3	chr6	89007604	+	24	GAGTCCCCGGCATGGCCCAgg	P1	111	0.034586	0	0.112962
CBFA2T3	chr6	89007613	+	24	GCCGGAGCCGAGTCCCCGGCA	P1	102	0.116333	0	0.0283337
CBFA2T3	chr6	89043351	+	23	GGGAGGGCCTCGGCTTTCCA	P2	26	0.890228	0.117391	0.365016
CBFA2T3	chr6	89043368	+	24	GACACCCAGTTGGTGGCCGGG	P2	9	1.13895	0.025	0.250756
CBFA2T3	chr6	89043391	+	27	GCTCCCACCCCCTCCCCAGGGCAG	P2	-14	0.148112	0	0.194441
CBFA2T3	chr6	89007434	-	23	GgACACGGCACTTACGGTCG	P1	281	-0.0344534	0	0.178266
CBFA2T3	chr6	89007441	-	23	GCACTTACGGTCGGGGGGTC	P1	274	-0.0100652	0	0.0144328
CBFA2T3	chr6	89007487	-	22	GCACACTCGCGACTCGGTC	P1	228	0.0023054	0	0.0550052
CBFA2T3	chr6	89007511	-	24	GAGTCGCTGCTCCTTCCAGCT	P1	204	0.0544177	0	0.131722
CBFA2T3	chr19	89007532	-	23	GGTCCCCGCCTCCACGACTC	P1	183	-0.0577893	0	0.0472291
CBFA2T3	chr19	89007555	-	23	GGCGGCTGCGCGCTGTCTTC	P1	160	0.0822123	0	0.0169106
CBFA2T3	chr19	89043336	-	26	GGGCTGGGCCAGCTGGGGCGTCC	P2	41	0.420074	0.276923	0.00374805
CBFA2T3	chr19	89043343	-	26	GCCAGCTGGGGCGTCCTGGAGTT	P2	34	0.970817	0.296154	0.0295699
CBFA2T3	chr19	89043356	-	27	GTCCTGGAGTTGGGCCTCTGTCCC	P2	21	0.168167	0.244444	0.00768454
CBFA2T3	chr19	89043366	-	25	GGCCTCTGTCCCTGGAAAGCCG	P2	11	0.701916	0.16	0.736218
CBFA2T3	chr19	89043386	-	24	GAGGCCCTCCCGGCCACCAAC	P2	-9	0.475818	0.05	0.189808
CBFA2T3	chr19	89043439	-	24	GCCCTGGGGCTCATGTGACGC	P2	-62	0.00262555	0	0.0206188
CBFA2T3	chr19	89043444	-	24	GGGGCTCATGTGACGCGGGGC	P2	-67	0.201912	0	0.041003
CCAR1	chr19	70480999	-	23	GCGCATGCGCCTAAAGCTGA	P1P2	-11	0.0491681	0	0.372215
CCAR1	chr19	70481039	-	22	GTTAGCCGGGACCCGACTC	P1P2	29	1.59201	0.1	0.0927012
CCAR1	chr19	70481084	-	23	GGAGCAGTGGGCGGCCAAGC	P1P2	74	0.0503988	0.943478	0.0242472
CCAR1	chr19	70481144	-	23	GAGCGATCTTTTGGGTAgcc	P1P2	134	0.0607939	1.88696	0.247428
CCAR1	chr19	70481157	-	24	GGGTAgcccggcggccccggg	P1P2	147	0.101447	0.791667	0.314877
CCAR1	chr19	70481167	-	24	GcggccccgggcggcgACGGT	P1P2	157	0.310233	0.229167	0.148776
CCAR1	chr19	70481177	-	24	GcggcgACGGTGGGGCTCTTG	P1P2	167	0.0308253	0.0208333	0.00999164
CCAR1	chr19	70481189	-	24	GGGCTCTTGTGGGACTGGGAC	P1P2	179	0.819099	0	0.0658039
CCAR1	chr19	70481199	-	24	GGGACTGGGACGGGAGGGACG	P1P2	189	0.588892	0	0.305659
CCAR1	chr19	70481214	-	23	GGACGCGGTCCCTTTTGTGC	P1P2	204	0.215829	0	0.201798
CCDC6	chr19	61666146	+	24	GCCAGCGAGAGCGACACGGAC	P1P2	121	1.16289	0	0.0697106
CCDC6	chr19	61666261	+	23	GGCGCTCCCCTGTGCTCGCC	P1P2	6	-0.0177364	0	0.0470919
CCDC6	chr19	61666348	+	24	GCAGAGGAGGTCCCTTGGCAG	P1P2	-81	0.697329	0	0.127374
CCDC6	chr19	61666387	+	24	GCAATACTGCCCAAGCCCGGG	P1P2	-120	0.403333	0	0.199376
CCDC6	chr19	61666257	-	24	GAAGGCCGGGCTGCGAATGAG	P1P2	10	0.673761	0	0.0367652
CCDC6	chr19	61666264	-	24	GGGCTGCGAATGAGTGGGCGC	P1P2	3	0.608265	0	0.102405
CCDC6	chr19	61666275	-	24	GAGTGGGCGCCGGGCGAGCAC	P1P2	-8	0.596283	0	0.0992699
CCDC6	chr19	61666417	-	23	GCTTGGGCAGTATTGCACTG	P1P2	-150	1.13978	0	0.798346
CCDC6	chr19	61666437	-	24	GGGGCTCGCTCCAGCCGGGCT	P1P2	-170	0.482596	0	0.0471772
CCDC6	chr1	61666450	-	24	GCCGGGCTGGGCGCGCTCCCT	P1P2	-183	0.0939023	0	0.00190842
CCNB1	chr1	68462824	+	23	GAAGGCGTTCGAGAGGGGCG	P1P2	-184	-0.158352	0.1	0.151428
CCNB1	chr1	68462830	+	21	GCGCGAAGGCGTTCGAGA	P1P2	-178	0.0184607	0.1	0.294194
CCNB1	chr1	68462842	+	24	GTTTCCAGGGCGATCGCGCGA	P1P2	-166	0.152669	0.0875	0.131036
CCNB1	chr1	68463097	+	22	GCGGCTCACCCTGGTGACT	P1P2	89	0.755921	0.318182	0.0316469
CCNB1	chr1	68462882	-	22	GAAACGCATTCTCTGCGAC	P1P2	-126	0.623197	0.0136364	0.594354
CCNB1	chr1	68462896	-	22	GCGACCGGCAGCCGCCAAT	P1P2	-112	0.305718	0	0.123838
CCNB1	chr1	68462963	-	24	GCGGGGTTTAAATCTGAGGCT	P1P2	-45	0.711866	0	0.128131
CCNB1	chr17	68463002	-	22	GCTGCGGCGGAACGGCTGT	P1P2	-6	1.24489	0.327273	0.0425238
CCNB1	chr17	68463035	-	23	GTGTAGGTCCTTGGCTGGTC	P1P2	27	0.237325	0.826087	0.0224996
CCNB1	chr17	68463109	-	24	GCCATGGCGCTCCGAGTCACC	P1P2	101	0.999187	0.4875	0.10045
CCNC	chr17	100016295	+	24	GGACGGGGCCTGTGACTCCCC	P1P2	232	0.1974	0.2	0.0117964
CCNC	chr17	100016343	+	24	GCGATCTTCCGTCTTCTCACC	P1P2	184	0.132002	0.258333	0.0581789
CCNC	chr17	100016449	+	21	GGGTCTATGGTCGCTCCG	P1P2	78	0.810037	0.0142857	0.482185
CCNC	chr17	100016467	+	23	GCGCGGTTACCGGACGGGCT	P1P2	60	0.00987627	0	0.13492
CCNC	chr17	100016473	+	22	GAGGAGCGCGGTTACCGGA	P1P2	54	1.04457	0	0.539632
CCNC	chr17	100016557	+	23	GGCCGGCGTGAAGGAGACTA	P1P2	-30	0.86909	0.1	0.166011
CCNC	chr22	100016566	+	22	GTGTTGTCGGCCGGCGTGA	P1P2	-39	0.301385	0.1	0.25205
CCNC	chr22	100016602	+	22	GAACTTTTGTCGATAGGAA	P1P2	-75	0.0281157	0.190909	0.238219
CCNC	chr22	100016607	+	21	GCCGGAACTTTTGTCGAT	P1P2	-80	0.0873764	0.171429	0.299033
CCNC	chr22	100016755	+	23	GACCGAGCGGCTTGGGCCCC	P1P2	-228	0.170782	0.43913	0.00511316
CCNC	chr22	100016248	-	24	GCATCTTGATTCTGACCGCTG	P1P2	279	-0.0192815	0.2	0.347656
CCNC	chr22	100016260	-	23	GACCGCTGCGGTCTCCCGTG	P1P2	267	0.707478	0.2	0.24018
CCNC	chr22	100016376	-	23	GACGGAAGATCGCTTACTAG	P1P2	151	0.326908	0.452174	0.186665
CCNC	chr22	100016480	-	23	GACCATAGACCCAGCCCGTC	P1P2	47	1.08634	0	0.175473
CCNC	chr22	100016550	-	24	GGCGGCGACGGCGAAAGGAAG	P1P2	-23	0.793751	0.195833	0.207872
CCNC	chr22	100016649	-	24	GCCCGCGGTAGCGGAGGGAGC	P1P2	-122	0.11876	0.1	0.0317953
CCNC	chr22	100016754	-	24	GCGAGAGCGTCTTGAGAATTC	P1P2	-227	-0.106568	1.25417	0.0835765
CCNC	chr22	100016761	-	23	GTCTTGAGAATTCTGGCCGG	P1P2	-234	-0.00218302	1.15217	0.204456
CCNC	chr22	100016828	-	24	GTGGGTCTAACCTAGGCGAAG	P1P2	-301	-0.00642595	0.654167	0.0465433
CCNC	chr22	100016840	-	22	GGCGAAGTGGCTCAGATAC	P1P2	-313	0.0939839	0.659091	0.0728975
CCND3	chr22	41909317	+	24	GgccggacccgcggcTGCTGG	P1P2	149	0.708949	0	0.190373
CCND3	chr22	41909345	+	24	GAAGGCACCCGGCAcgcgccc	P1P2	121	0.817315	0	0.35952
CCND3	chr22	41909552	+	23	GCTACATCGTCGCGAGGGGC	P1P2	-86	0.235859	0	0.0496726
CCND3	chr22	41909558	+	21	GGTTGCTACATCGTCGCG	P1P2	-92	-0.00494765	0	0.507372
CCND3	chr22	41909577	+	22	GCGACGTCCGAGCATTCCA	P1P2	-111	0.992712	0	0.751517
CCND3	chr22	41909361	-	24	GcccggcccggggcgcgTGCC	P1P2	105	0.0163282	0	0.174806
CCND3	chr19	41909392	-	24	GCAACACAGCAGCTCCATACT	P1P2	74	0.588157	0	0.0806417
CCND3	chr19	41909448	-	24	GCGAGTCCCAAGGCAGGCGAC	P1P2	18	1.16362	0	0.181854
CCND3	chr19	41909591	-	22	GTAGCAACCGTGGAATGCT	P1P2	-125	0.843672	0	0.281261
CCND3	chr19	41909612	-	22	GACGTCGCAACGCTCCGAG	P1P2	-146	0.412592	0	0.714927
CCNJ	chr19	97803334	+	24	GCTCGCGCCGCCCATTGTTAA	P1P2	-14	0.0832623	0	0.0776317
CCNJ	chr19	97803539	+	24	GGCTCTGCGCCTCACCCCGGG	P1P2	191	1.77784	0	0.390761
CCNJ	chr19	97803585	+	23	GTTCCGCGCGGCCTCAGAAA	P1P2	237	0.474424	0	0.230757
CCNJ	chr19	97803443	-	23	GGCCGGCGTCCGCCGCACGA	P1P2	95	0.421748	0	0.369863
CCNJ	chr19	97803446	-	21	GCGTCCGCCGCACGACGG	P1P2	98	0.406217	0	0.156201
CCNJ	chr19	97803476	-	23	GCTGTGAGGGCCGCGGTTCC	P1P2	128	0.385906	0	0.00186131
CCNJ	chr19	97803499	-	24	GTAAGGGAGCCAGCGTGGGGC	P1P2	151	0.410073	0	0.0349462
CCNJ	chr19	97803518	-	24	GCCGGGCGGCCCGGCAGGCCT	P1P2	170	0.165657	0	0.0209798
CCNJ	chr19	97803546	-	24	GCGTGGGGCAGCGGACCCTCC	P1P2	198	0.747739	0	0.0255947
CCNJ	chr19	97803620	-	22	GCGCGGAACGTGCGTTTCT	P1P2	272	0.0536614	0.0454546	0.00560055
CCNK	chr19	99947743	+	24	GCCATCTTGTATATGGAATGT	P1	-48	0.0821439	0	0.0859512
CCNK	chr19	99947825	+	23	GCGGCGCTGCCCTCAGTCGG	P1	34	0.796831	0.213043	0.0998605
CCNK	chr19	99947935	+	22	GTGTACCGGAGGTTAGCGG	P1	144	0.626681	0	0.631592
CCNK	chr19	99947796	-	23	GGCAAGGAGAGACGTCGCTG	P1	5	1.12662	0	0.0510984
CCNK	chr19	99947838	-	23	GTGAGTGACCCACCGACTGA	P1	47	1.02325	0.121739	0.448567
CCNK	chr19	99947866	-	24	GCCGCCCACCTCCCGCGTATC	P1	75	0.237453	0.991667	0.00565261
CCNK	chr1	99947906	-	23	GGCCAACCGCCGCTATCCAC	P1	115	0.85013	1.57826	0.0907969
CCNK	chr1	99947981	-	22	GAACTTTGCGGGCGACGCG	P1	190	-0.00295213	0	0.792314
CCNK	chr1	99947993	-	24	GGCGACGCGGGGTTGTGGGGC	P1	202	0.641601	0	0.00423405
CCNK	chr1	99948019	-	23	GTAGAGAGGGTCTGAGGCGC	P1	228	0.500791	0	0.0436792
CCNT1	chr1	49110454	+	23	GCCTTCTGGTTGAAGCACTA	P1P2	4	0.88006	0.173913	0.116344
CCNT1	chr1	49110500	+	24	GGTCGCCTCTTAGGTGACGCT	P1P2	-42	0.310865	0.258333	0.384184
CCNT1	chr1	49110510	+	23	GCGGATGTGGGTCGCCTCTT	P1P2	-52	1.14763	0.308696	0.0470682
CCNT1	chr1	49110529	+	24	GTCGCAGTTGCCCCCGCACAG	P1P2	-71	0.972312	0.383333	0.668418
CCNT1	chr1	49110596	+	23	GACTTTTGCTTCCTCTACGG	P1P2	-138	0.791258	0.0173913	0.551832
CCNT1	chr1	49110632	+	24	GGGGTGTAGCGAGGTGCATTC	P1P2	-174	0.0613301	0.158333	0.41129
CCNT1	chr1	49110653	+	21	GGCTGTTAACTCGGCTAC	P1P2	-195	0.43367	0.2	0.0171844
CCNT1	chr1	49110672	+	23	GGTTTTTTCTGGTCGCATAT	P1P2	-214	-0.095161	0.2	0.326151
CCNT1	chr1	49110541	-	24	GCGACCCACATCCGCTGTGCG	P1P2	-83	0.467095	0.358333	0.241014
CCNT1	chr1	49110607	-	24	GGTTGTTACTTGCCTCCGTAG	P1P2	-149	0.327596	0.0708333	0.640323
CDC16	chr1	115000543	+	23	GGTTCATGGCGGCGCGGGCC	P1P2	85	-0.0385504	0	0.0156853
CDC16	chr1	115000554	+	24	GCAGCCGCTCTAGGTTCATGG	P1P2	96	1.4219	0	0.723421
CDC16	chr1	115000615	+	23	GGGCCCCGCACCCCGAGTCG	P1P2	157	0.271538	0.0478261	0.30119
CDC16	chr1	115000511	-	24	GCGGGGTGCTTAGGGTGCAGG	P1P2	53	0.407323	0	0.0764703
CDC16	chr1	115000535	-	23	GCGCGCCTAGCGGCGGAGTG	P1P2	77	0.049238	0	0.0467399
CDC16	chr1	115000547	-	24	GGCGGAGTGTGGCGTGAGGCC	P1P2	89	0.0169677	0	0.0901493
CDC16	chr1	115000607	-	24	GCGTCCGGCAGTACCTCGACC	P1P2	149	1.17078	0	0.160193
CDC16	chr1	115000614	-	24	GCAGTACCTCGACCAGGTGGG	P1P2	156	0.217132	0	0.57082
CDC16	chr1	115000633	-	23	GCGGCCCCGACTCGGGGTGC	P1P2	175	0.00445216	0.026087	0.00860657
CDC16	chr1	115000649	-	24	GGTGCGGGGCCCAGGCCTCGC	P1P2	191	-0.00654519	0.0916667	0.0424495
CDC20	chr1	43824780	+	23	GAAAGGGACCCCTTCGCTCC	P1P2	121	0.572075	0.134783	0.0114255
CDC20	chr1	43824808	+	24	GGAAAGGAGGCGACGGTGCTC	P1P2	149	0.491176	0.0875	0.00384577
CDC20	chr1	43824816	+	24	GCCCTGGAGGAAAGGAGGCGA	P1P2	157	1.09894	0.0875	0.0909999
CDC20	chr1	43824671	-	23	GCCGGTCGGAACTGCTCCGG	P1P2	12	1.32898	0.186957	0.00730246
CDC20	chr3	43824745	-	24	GAGGGGGTGCTAGGCCGGAAG	P1P2	86	0.449784	0.2	0.0846637
CDC20	chr3	43824761	-	24	GGAAGGGGCTGCAGCCGAGGG	P1P2	102	0.42065	0.179167	0.0650617
CDC20	chr3	43824779	-	24	GGGTGGCCCTGATTTTGTGGC	P1P2	120	-0.00707073	0.0708333	0.378843
CDC20	chr3	43824784	-	24	GCCCTGATTTTGTGGCCGGCC	P1P2	125	0.0376842	0.0666667	0.0119602
CDC20	chr3	43824794	-	23	GTGGCCGGCCAGGAGCGAAG	P1P2	135	0.45333	0.0695652	0.256178
CDC23	chr3	137548738	+	23	GTGTTCCAGGTCGGCGGAGT	P1P2	259	1.00366	0.530435	0.0171095
CDC23	chr3	137548761	+	24	GTCGAGCTGATCTAGTTTGTG	P1P2	236	0.324119	0.25	0.0936945
CDC23	chr3	137548791	+	24	GGGGCTTGGATCCTTGGCCTT	P1P2	206	0.012929	0.1	0.041074
CDC23	chr3	137548861	+	23	GCGGGCCTTACCCGGGAGCG	P1P2	136	0.0243667	0.921739	0.104433
CDC23	chr18	137548868	+	23	GCTTATTGCGGGCCTTACCC	P1P2	129	0.74877	0.813044	0.538743
CDC23	chr18	137549020	+	24	GTATTATCGCCGATGATTGGC	P1P2	-23	0.0547011	0.295833	0.0882252
CDC23	chr18	137549050	+	24	GCAGATATTTTTGGTGCAGAT	P1P2	-53	0.00870442	0.120833	0.20619
CDC23	chr18	137548873	-	23	GTGTAGTAGGCCCCGCTCCC	P1P2	124	0.430311	0.865217	0.0735371
CDC23	chr18	137548944	-	24	GAGAAATCGCTGTTTATGGAC	P1P2	53	0.330363	0.233333	0.131972
CDC23	chr18	137549034	-	23	GGGCCACTCCAGCCAATCAT	P1P2	-37	1.24757	0.426087	0.649612
CDC26	chr18	116037571	+	22	GTGCCCCCCGGGCGTACGG	P1P2	269	0.263724	0.663636	0.456794
CDC26	chr18	116037599	+	24	GGAGCGAGTCAAGGGCTTCCG	P1P2	241	-0.0537128	1.09167	0.581874
CDC26	chr18	116037609	+	24	GCTGAACTCTGGAGCGAGTCA	P1P2	231	0.018403	1.0625	0.0307083
CDC26	chr18	116037634	+	23	GTGAGTCGACTCGCGCGGCT	P1P2	206	0.813746	0.552174	0.0716219
CDC26	chr18	116037639	+	23	GGTAGGTGAGTCGACTCGCG	P1P2	201	0.919018	0.46087	0.821599
CDC26	chr18	116037681	+	24	GGGAGCCGAGGTTCCGGGAAG	P1P2	159	0.891928	0.2	0.0577384
CDC26	chr18	116037744	+	24	GAGAGAGGCTCCAAGCAGTCT	P1P2	96	0.0502883	1.3375	0.065487
CDC26	chr18	116037821	+	24	GAAATGGCGTCGTGGCATTGA	P1P2	19	0.042689	0.1875	0.0647786
CDC26	chr18	116037838	+	24	GATGGAAGTCGTAGTAGGAAA	P1P2	2	0.00654742	0.116667	0.23318
CDC26	chr18	116037872	+	24	GAGGGGTCACCGCCCCCGGAG	P1P2	-32	1.18905	0.1	0.0693904
CDC27	chr18	45266358	+	24	GCCTATCTTTAGTCAGTTCGG	P1P2	253	0.0731229	0.379167	0.330802
CDC27	chr18	45266426	+	23	GGCCACTCCGCGGCCTGGTG	P1P2	185	1.03284	0.0652174	0.0217208
CDC27	chr18	45266436	+	22	GCAGCGTAGGGCCACTCCG	P1P2	175	0.953942	0.0454546	0.767749
CDC27	chr18	45266447	+	23	GGTCGGGAAGCAGCAGCGTA	P1P2	164	0.917554	0.391304	0.218559
CDC27	chr12	45266275	-	23	GACGTTGGCTCGGACGGGAA	P1P2	336	1.01322	1.2087	0.060024
CDC27	chr12	45266331	-	23	GTGAAGTAATGTAGGGCCAG	P1P2	280	0.254702	0.873913	0.175282
CDC27	chr12	45266345	-	24	GGGCCAGAGGTAACACGGCTT	P1P2	266	0.163365	1.03333	0.0373494
CDC27	chr12	45266514	-	24	GAGAAGAAGGTTATCATTACC	P1P2	97	0.216658	3.8	0.0503184
CDC27	chr12	45266518	-	23	GAAGGTTATCATTACCTGGA	P1P2	93	-0.0461648	2.88696	0.0880534
CDC27	chr12	45266551	-	24	GCACCGTCATCCTCGAGGCTC	P1P2	60	0.0445464	0.725	0.0121361
CDC5L	chr12	44355225	+	23	GAGATAGCGGCGGTAGCGCT	P1P2	-245	0.619561	0.195652	0.123352
CDC5L	chr12	44355235	+	22	GGCTCTCGCGAGATAGCGG	P1P2	-235	0.975376	0.2	0.793786
CDC5L	chr12	44355383	+	22	GCAAGTCTCGCGAGATATT	P1P2	-87	0.504153	0.309091	0.0823308
CDC5L	chr12	44355421	+	22	GATCTGCGCAAGCGCAAGG	P1P2	-49	0.0155617	0.295455	0.409528
CDC5L	chr20	44355487	+	22	GTAACAGCGATTGGGCCAC	P1P2	17	0.985757	0.481818	0.122488
CDC5L	chr20	44355494	+	23	GAGAAGTAGTAACAGCGATT	P1P2	24	0.932233	0.882609	0.147849
CDC5L	chr20	44355524	+	24	GTGTCTCGGCAAGCAGCCGAG	P1P2	54	0.0215645	2.525	0.752005
CDC5L	chr20	44355307	-	23	GCGCGGGGCGTAAGGCGCTT	P1P2	-163	0.56485	0.9	0.112825
CDC5L	chr20	44355324	-	24	GCTTTGGCCAGAGTGGTTTGA	P1P2	-146	0.181741	0.4	0.22837
CDC5L	chr20	44355456	-	23	GCGCAGATCTTCAAAGCAGA	P1P2	-14	-0.0205275	0.2	0.7024
CDC73	chr20	193091110	+	23	GTAAGGCAAGGCCCCGCCGC	P1P2	-112	0.79901	0	0.260331
CDC73	chr20	193091127	+	23	GCCGAGGACCCCGCGCTGTA	P1P2	-95	0.899991	0	0.0336305
CDC73	chr20	193091169	+	24	GTCCTCGCCTACGACAGCAGC	P1P2	-53	-0.0139711	0.145833	0.0726218
CDC73	chr1	193091139	-	24	GCGGGGCCTTGCCTTACAGCG	P1P2	-83	0.427657	0	0.237891
CDC73	chr1	193091226	-	24	GCTGCTGCTGTTGGTTCGTCG	P1P2	4	0.4134	0.195833	0.307584
CDC73	chr1	193091235	-	24	GTTGGTTCGTCGCggcggcga	P1P2	13	0.0182513	0.158333	0.266326
CDC73	chr1	193091315	-	24	Ggcggcgccccgagccggcgg	P1P2	93	1.20488	0	0.170339
CDC73	chr1	193091321	-	24	GccccgagccggcggAGGCGA	P1P2	99	0.532893	0	0.326508
CDC73	chr1	193091394	-	24	GAAGAAGGAGATTGTGGTGAA	P1P2	172	0.263256	0.2	0.125457
CDC73	chr1	193091425	-	24	GTGATCTTCGGGGAGTTCTCC	P1P2	203	0.00433591	1.20417	0.0197904
CDCA3	chr1	6960984	+	24	GCGTGCCTTCTATTGAAGAGC	P1P2	-577	0.0249068	1.19583	0.132981
CDCA3	chr1	6961073	+	23	GCGCACGTAGAGCAGCTAGG	P1P2	-666	0.882343	0.0347826	0.628915
CDCA3	chr1	6961101	+	23	GAACCAATCCCACTCCTCCA	P1P2	-694	0.659068	0	0.52668
CDCA3	chr17	6961218	+	23	GCGGAGACGACGCGCGAGAA	P1P2	-811	1.09324	0.073913	0.100984
CDCA3	chr17	6961029	-	22	GAATGGACTCTAAGGGTCC	P1P2	-622	0.863962	0.722727	0.0556226
CDCA3	chr17	6961106	-	24	GCTCTACGTGCGCTCCCGCCC	P1P2	-699	0.520001	0	0.0340894
CDCA3	chr17	6961115	-	24	GCGCTCCCGCCCTGGAGGAGT	P1P2	-708	0.763147	0	0.0135893
CDCA3	chr17	6961161	-	23	GCCTTAGGAGCGCTTCTCAT	P1P2	-754	0.978572	0	0.322419
CDCA3	chr17	6961184	-	24	GCGTCAGTCAAGCGCGGGGCA	P1P2	-777	0.0390866	0	0.09873
CDCA3	chr17	6961262	-	24	GCGGCGCATGCCCCTAACGAG	P1P2	-855	0.928187	0	0.441596
CDCA8	chr17	38158230	+	24	GTACCTGCGGTCCCGAGACAA	P1P2	-7	0.91999	1.0125	0.244747
CDCA8	chr17	38158244	+	22	GTCGCCAGGCACGTACCTG	P1P2	7	0.178695	1.82727	0.175348
CDCA8	chr17	38158257	+	24	GGACCACCCGAAGAAGTCGCC	P1P2	20	0.0462162	2.85417	0.229784
CDCA8	chr7	38158281	+	24	GGTAGGGACGAGGAGGGCGGA	P1P2	44	0.445871	3.22917	0.374953
CDCA8	chr7	38158292	+	24	GCAAGAAACTGGGTAGGGACG	P1P2	55	0.0247218	2.2875	0.146207
CDCA8	chr7	38158347	+	23	GGAGCCATGGCGCTCGGCGG	P1P2	110	1.33119	0.073913	0.265393
CDCA8	chr7	38158133	-	25	GTGATTGGATGTTGTGGGACGG	P1P2	-104	-0.00749246	0.188	0.409469
CDCA8	chr7	38158209	-	23	GTAGAGCCGCTCTCTCTCAC	P1P2	-28	0.748824	0.1	0.494785
CDCA8	chr7	38158273	-	24	GTACGTGCCTGGCGACTTCTT	P1P2	36	-0.0218339	2.28333	0.102462
CDCA8	chr7	38158377	-	23	GAGCGCCATGGCTCCTAGGA	P1P2	140	0.214552	0.0130435	0.0357954
CENPE	chr7	104119334	+	23	GCGAGGCCTACGATGTTTCC	P1P2	154	0.52066	0.0869565	0.082241
CENPE	chr7	104119357	+	24	GCGGCGCCGCCCTGAGCCGGA	P1P2	131	0.766722	0.1	0.407152
CENPE	chr7	104119412	+	23	GCCGCTGAACAGCAGGTAGG	P1P2	76	0.609703	0	0.097234
CENPE	chr7	104119434	+	22	GGCCGTCTGCGTGCGAGTG	P1P2	54	0.661888	0	0.04572
CENPE	chr7	104119462	+	24	GCCTGATAGGATGGCGGAGGA	P1P2	26	1.01097	0.283333	0.0176471
CENPE	chr7	104119573	+	23	GCTCAATCAGATGCGGCGTT	P1P2	-85	0.00472631	0.156522	0.132617
CENPE	chr7	104119331	-	24	GACAGCAGAGCCGGGAAGCAG	P1P2	157	1.22231	0	0.514098
CENPE	chr7	104119399	-	24	GCCGCAGGCCCAGCGGGCACC	P1P2	89	0.394616	0.0916667	0.029436
CENPE	chr7	104119545	-	24	GGCCGGCACTTCAGGGCTCAC	P1P2	-57	0.487589	0.00833333	0.154278
CENPE	chr7	104119600	-	22	GCCGCATCTGATTGAGCCG	P1P2	-112	0.00893316	0.118182	0.638541
CENPF	chr7	214776535	+	23	GTGCCCAATTCGCCCGCTTC	P1P2	-30	0.37171	0.0130435	0.0136542
CENPF	chr7	214776605	+	23	GTACAGTTCTGGCGCGGCTT	P1P2	40	0.831809	0.63913	0.397993
CENPF	chr7	214776792	+	24	GGGCGGTCCCCGGCACCTACA	P1P2	227	0.905886	0.108333	0.325318
CENPF	chr7	214776554	-	24	GAGACCAGAAGCGGGCGAATT	P1P2	-11	0.846773	0	0.0254612
CENPF	chr7	214776566	-	23	GGCGAATTGGGCACCGGTGG	P1P2	1	0.901174	0.0652174	0.230796
CENPF	chr7	214776680	-	24	GAGCAAGGTGAGCGTCCTGAC	P1P2	115	0.942597	0.0916667	0.0183864
CENPF	chr7	214776686	-	23	GTGAGCGTCCTGACTGGGTC	P1P2	121	1.09294	0.1	0.106937
CENPF	chr7	214776693	-	24	GTCCTGACTGGGTCCGGATCC	P1P2	128	0.218778	0.1	0.00320804
CENPF	chr7	214776716	-	24	GCCCTGGCGGCGGGCGGTAGG	P1P2	151	0.865274	0.00833333	0.01658
CENPF	chr7	214776800	-	23	GATCACTCTCCCGGCCCTGT	P1P2	235	0.964462	0.00869565	0.22821
CENPI	chr7	100353412	+	24	GTTCCTAGGAAAGAAGGGCAG	P1P2	205	0.475727	0.358333	0.418665
CENPI	chr7	100353187	-	24	GTCAGCTTCTTTGAATTCCGG	P1P2	-20	0.201903	0.258333	0.45215
CENPI	chr7	100353197	-	22	GAATTCCGGAGGCGGCATT	P1P2	-10	1.30353	0.163636	0.191593
CENPI	chr19	100353207	-	24	GAGGCGGCATTCGGTGGTCAG	P1P2	0	0.733643	0.1125	0.108704
CENPI	chr19	100353237	-	23	GGCTGCAGGTAGAGTGTCTT	P1P2	30	0.96283	0.0391304	0.0213268
CENPI	chr19	100353318	-	23	GAGGGTGGGACTATCCTGCA	P1P2	111	0.364823	1.78696	0.0409622
CENPI	chr19	100353369	-	22	GTTTCGCACCAGGGATCCT	P1P2	162	0.190103	0.309091	0.0832343
CENPI	chr19	100353393	-	24	GAAGCGCTGGGATGGTTCAAC	P1P2	186	0.202034	0.129167	0.0176454
CENPI	chr19	100353398	-	24	GCTGGGATGGTTCAACTGGGT	P1P2	191	0.363551	0.120833	0.0088333
CENPI	chr19	100353471	-	22	GGAACCTGTAACGTCCCAC	P1P2	264	0.494028	1.10455	0.400531
CENPJ	chr19	25496786	+	24	GGACCTCGGGGTTGGCTCGGC	P1P2	140	0.264775	0	0.00614837
CENPJ	chr19	25496808	+	24	GTGGGCGGGCAGGACTCTGCT	P1P2	118	0.107228	0	0.19948
CENPJ	chr19	25496819	+	24	GATGGACGGCGGTGGGCGGGC	P1P2	107	-0.0379486	0	0.009772
CENPJ	chrX	25496827	+	24	GCGCCGGAGATGGACGGCGGT	P1P2	99	0.0142485	0	0.0523399
CENPJ	chrX	25496887	+	24	GCTTCACGGAGCGGTAATTTG	P1P2	39	0.0793267	0.191667	0.096981
CENPJ	chrX	25496948	+	24	GCGGCCCATTTGTAAATGCTG	P1P2	-22	0.909947	0.0458333	0.364989
CENPJ	chrX	25496968	+	23	GACAGAGGCGGCGATTGTGG	P1P2	-42	1.74181	0	0.386531
CENPJ	chrX	25496854	-	22	GCCGTCCATCTCCGGCGCA	P1P2	72	-0.00827138	0	0.0650202
CENPJ	chrX	25497022	-	24	GCCCCCGTCCCGAGGTCCTGT	P1P2	-96	0.0991775	0	0.281937
CENPJ	chrX	25497062	-	23	GCGCGTCTGCGCTAAAGCGC	P1P2	-136	0.348243	0.1	0.441966
CENPM	chrX	42342910	+	23	GCCAGCGCGCGCTACCGTGG	P1P2	207	0.0363518	0.2	0.148591
CENPM	chrX	42343022	+	24	GCCTGAACACGGCCACCATCT	P1P2	95	0.722381	1.34167	0.0399396
CENPM	chrX	42343065	+	24	GCGGCTGTGATGTCGGTGTTG	P1P2	52	0.153821	0.254167	0.0584131
CENPM	chrX	42343105	+	23	GAAAGATCGGCGCGCACCGC	P1P2	12	0.0391658	0.256522	0.0249537
CENPM	chrX	42343134	+	24	GCGCTCTAGGGGCTGGACTCA	P1P2	-17	1.39109	0.270833	0.00476206
CENPM	chrX	42343148	+	23	GTGCCCCCAGGCCGCGCTCT	P1P2	-31	0.228833	0.13913	0.00255734
CENPM	chrX	42343174	+	23	GCGAAGCCCCGCCTATAAGG	P1P2	-57	0.020055	0	0.64486
CENPM	chrX	42342918	-	24	GCCTATTCCCCGCCCCCGCCA	P1P2	199	0.0276118	0.154167	0.621632
CENPM	chrX	42343030	-	24	GGCCGCCTGCACCTACCAAGA	P1P2	87	0.886527	1.01667	0.238944
CENPM	chrX	42343188	-	24	GGGCACGTGCCTCCTTATAGG	P1P2	-71	0.0908436	0.0125	0.36584
CEP135	chrX	56815175	+	24	GCCTCCAGCCGCATTGCCCTC	P1P2	157	0.0719244	0.254167	0.176444
CEP135	chrX	56815273	+	22	GGTACCGCCCAGAAGGCGA	P1P2	255	1.12085	0	0.326934
CEP135	chrX	56815279	+	23	GCCCGCGGGTACCGCCCAGA	P1P2	261	1.14963	0	0.0452593
CEP135	chr3	56815154	-	23	GGAGCCCGTGCCTGGACGGA	P1P2	136	0.260373	0.0434783	0.0604045
CEP135	chr3	56815194	-	24	GAGGCCTGAGGGCAATGCGGC	P1P2	176	0.142278	0.179167	0.0556565
CEP135	chr3	56815241	-	24	GCTGCCGGTGAGTCCGGATGT	P1P2	223	0.534814	0.116667	0.0230662
CEP135	chr3	56815290	-	24	GTGGCGCCTTCGCCTTCTGGG	P1P2	272	0.729518	0	0.546153
CEP135	chr3	56815310	-	24	GCGGTACCCGCGGGCCGGGCT	P1P2	292	-0.113765	0	0.0118017
CEP135	chr3	56815321	-	24	GGGCCGGGCTCGGGCACTGCC	P1P2	303	0.241664	0	0.0605657
CEP135	chr3	56815370	-	24	GAGGCCAGGCCGGGTCAGACC	P1P2	352	0.685121	0	0.0206889
CEP152	chr3	49103072	+	25	GATGCTGGCTGAGGGTTCCTGG	P1P2	163	0.0263876	0.276	0.282186
CEP152	chr3	49103105	+	25	GACCTGGGGTTAGAGGAGTTGC	P1P2	130	0.0853212	0.836	0.0250612
CEP152	chr3	49103114	+	25	GTGAGCTTGGACCTGGGGTTAG	P1P2	121	0.0303456	0.948	0.0543549
CEP152	chr8	49103129	+	24	GTTCTGATTCACGGGTGAGCT	P1P2	106	0.00469048	0.9375	0.0614568
CEP152	chr8	49103178	+	24	GCCAGGACTAGAGTTTCCTCG	P1P2	57	1.14415	0.333333	0.971968
CEP152	chr8	49103196	+	24	GCTAGAAGTTGGTCTTCCGCC	P1P2	39	0.120725	0.3	0.588096
CEP152	chr8	49103208	+	24	GTAAGGGGATCTGCTAGAAGT	P1P2	27	0.861803	0.258333	0.108301
CEP152	chr8	49103102	-	24	GAACCCTCAGCCAGCATCCCG	P1P2	133	0.657305	0.241667	0.42878
CEP152	chr8	49103162	-	22	GTGAATCAGAACTTACCGG	P1P2	73	0.120194	0.95	0.833527
CEP152	chr8	49103185	-	24	GCCACGGAGGCTGTTACCGCG	P1P2	50	0.994047	0.55	0.644213
CEP192	chr8	12991374	+	24	GGGAAAGTCCACGGACTGAAG	P1P2	-19	1.03035	0.00833333	0.344917
CEP192	chr8	12991410	+	23	GCCCGCGTCCCCGACTTCGG	P1P2	17	0.793717	0.169565	0.163705
CEP192	chr8	12991461	+	24	GTCTGCCTCCCGCCTAGGCGC	P1P2	68	0.131972	0.366667	0.285223
CEP192	chr8	12991467	+	24	GCATGCGTCTGCCTCCCGCCT	P1P2	74	-0.0051062	0.4375	0.03762
CEP192	chr8	12991337	-	24	GTTCCGGGCTCCAGCCGGTGC	P1P2	-56	-0.00663702	0.266667	0.0239399
CEP192	chr8	12991423	-	23	GCACACTGCCCTCCGAAGTC	P1P2	30	0.130519	0.126087	0.0795255
CEP192	chr8	12991445	-	24	GGGACGCGGGCTCGGTGAGGG	P1P2	52	0.507522	0.2	0.0718864
CEP192	chr8	12991526	-	23	GTTTCGGCTGCCGGACCGAC	P1P2	133	0.0226055	0.0434783	0.181642
CEP192	chr8	12991540	-	24	GACCGACGGGACAGTGACGGT	P1P2	147	0.225164	0	0.0340479
CEP192	chr8	12991589	-	24	GCGGCCTCAGGGCGCGAGCAA	P1P2	196	0.911217	0	0.104425
CEP350	chr8	179924021	+	24	GCGGCTCCCTGCAGTTCTCTC	P1P2	67	0.852693	0.266667	0.0558728
CEP350	chr8	179924041	+	24	GGCAAGCCACCCCCCGAGCTG	P1P2	87	0.608269	0.154167	0.469998
CEP350	chr8	179924122	+	24	GCCCTCCTCGCACCGGCTCCG	P1P2	168	0.875413	0	0.147145
CEP350	chr7	179923847	-	24	GCATGCCTGTGGCACTGTCTC	P1P2	-107	0.146973	0	0.0670935
CEP350	chr7	179923962	-	22	GTCAGTTGTTGGGCTGTAA	P1P2	8	1.20407	0	0.140661
CEP350	chr7	179923996	-	24	GCCCCTGACGAAGTGACTCCC	P1P2	42	0.920517	0.0625	0.0813899
CEP350	chr7	179924001	-	23	GACGAAGTGACTCCCGGGCC	P1P2	47	-0.041995	0.0869565	0.029105
CEP350	chr7	179924051	-	24	GAACTGCAGGGAGCCGCAGCT	P1P2	97	0.13129	0.2625	0.0209381
CEP350	chr7	179924074	-	24	GGGGGTGGCTTGCCCTGAGGG	P1P2	120	0.427626	0.1125	0.0894539
CEP350	chr7	179924133	-	24	GGACCGGCGGATCCCCGGAGC	P1P2	179	0.503571	0	0.0122249
CEP63	chr7	134205089	+	25	GCCCCTCCAACTTGCGCACCGG	P1P2	481	0.373992	0.02	0.179813
CEP63	chr7	134205123	+	25	GGGCCGCCTCCAGACCAGGACA	P1P2	515	0.743851	0.1	0.518661
CEP63	chr7	134205077	-	24	GAAGGCTCAGGGGCGTGCTTG	P1P2	469	0.0982254	0.0416667	0.0300592
CEP63	chr7	134205095	-	22	GCGGCAACCCTGTAACCGC	P1P2	487	1.67859	0.0954545	0.186995
CEP63	chr7	134205107	-	23	GTAACCGCCGGTGCGCAAGT	P1P2	499	0.563909	0.0434783	0.334373
CEP63	chr7	134205118	-	24	GTGCGCAAGTTGGAGGGGCAA	P1P2	510	0.57756	0	0.129633
CEP63	chr7	134205168	-	25	GCCCAGGCTGCCTTGGTGATTC	P1P2	560	0.0685071	0.1	0.0109972
CEP63	chr7	134205176	-	24	GCCTTGGTGATTCTGGCTTCG	P1P2	568	0.128182	0.1	0.202931
CEP63	chr9	134205184	-	24	GATTCTGGCTTCGCGGCCTCA	P1P2	576	-0.0166113	0.1	0.0701708
CEP63	chr9	134205191	-	24	GCTTCGCGGCCTCATGGCTTG	P1P2	583	-0.0599798	0.1	0.177034
CHAF1A	chr9	4402623	+	24	GCTCGTATTTGGCGGGAACCG	P1P2	-35	0.515339	0	0.524719
CHAF1A	chr9	4402632	+	23	GccgccgcGCTCGTATTTGG	P1P2	-26	0.179185	0	0.311704
CHAF1A	chr9	4402722	+	24	GCTCGACCTCCTCTCAGGCGG	P1P2	64	0.545468	0	0.373957
CHAF1A	chr9	4402728	+	24	GCGGCAGCTCGACCTCCTCTC	P1P2	70	0.999643	0	0.100002
CHAF1A	chr9	4402710	-	24	GaagagcagcggccgcCTGAG	P1P2	52	0.554935	0	0.346934
CHAF1A	chr9	4402739	-	24	GCGCCTCCGCCGCCTGAGAGG	P1P2	81	0.31999	0	0.238239
CHAF1A	chr9	4402783	-	23	GCTGGAGGAGCTGGAGTGCG	P1P2	125	0.652506	0	0.29694
CHAF1A	chr9	4402811	-	23	GGCGCCAGGGGAGCCGCCAC	P1P2	153	0.825372	0	0.0106767
CHAF1A	chr17	4402833	-	24	GGTCGGTTCGGGCCCGCGCCG	P1P2	175	0.0209547	0	0.188811
CHAF1A	chr17	4402941	-	24	GCGGGCCGGGCGTTCACCCCC	P1P2	283	0.278086	0	0.00832154
CHAF1B	chr17	37757741	+	24	GCCAGGGAAGCCGTACCTGGA	P1P2	10	1.10584	0	0.295105
CHAF1B	chr17	37757839	+	23	GCGCCGCTCCGGAGCTATCC	P1P2	108	0.023845	0	0.0362308
CHAF1B	chr17	37757908	+	24	GCTGGGACTGAGGCCGCCGGG	P1P2	177	0.250511	0	0.27768
CHAF1B	chr17	37757654	-	23	GGAGGGGCGGGGCGTCTATG	P1P2	-77	0.00347193	0	0.179437
CHAF1B	chr17	37757739	-	23	GACGGTGCCTCTGACTGTCC	P1P2	8	0.628553	0	0.0175974
CHAF1B	chr17	37757754	-	22	GTCCGGGTCCCTCCAGGTA	P1P2	23	1.2656	0	0.0917937
CHAF1B	chr17	37757803	-	24	GCTCTTTTGGTCGCGTCGGTC	P1P2	72	0.0131228	0	0.0069413
CHAF1B	chr17	37757811	-	24	GGTCGCGTCGGTCCGGGCCAG	P1P2	80	0.0230361	0	0.0434681
CHAF1B	chr3	37757824	-	22	GGCCAGAGGCCCTCGCCGA	P1P2	93	0.140265	0	0.0774202
CHAF1B	chr3	37757858	-	24	GGCCCCGGGATAGCTCCGGAG	P1P2	127	0.408429	0	0.425058
CHIC2	chr3	54930576	+	23	GACAGCGAACTCCGCGGCCT	P1P2	177	0.028408	0.00869565	0.0588276
CHIC2	chr3	54930582	+	24	GACAGCCGACAGCGAACTCCG	P1P2	171	0.914721	0.0375	0.64085
CHIC2	chr3	54930612	+	23	GACCCCATCCCCTCTGTAGC	P1P2	141	0.0925872	0.1	0.272978
CHIC2	chr3	54930703	+	24	GCTTGTGGAGGTGTCGGCCTC	P1P2	50	0.0697286	0.0666667	0.00290753
CHIC2	chr3	54930719	+	22	GCAGCGGCGTCTGTGCTTG	P1P2	34	0.40993	0.0318182	0.00787659
CHIC2	chr3	54930791	+	24	GTAGCCGGCTGCTCCCGCTGC	P1P2	-38	0.730411	0	0.0178071
CHIC2	chr3	54930626	-	24	GTCTCGGCTCCGGCTACAGAG	P1P2	127	0.872346	0.1	0.829614
CHIC2	chr3	54930631	-	24	GGCTCCGGCTACAGAGGGGAT	P1P2	122	1.21293	0.1	0.170658
CHIC2	chr3	54930846	-	24	GAGACTTCCCGGGCCAAcggg	P1P2	-93	0.559052	0	0.592348
CHIC2	chr3	54930890	-	24	Gtgggcgagcggactggctgg	P1P2	-137	-0.038984	0	0.193313
CKAP5	chr3	46867485	+	24	GGTGGCAGCGTCCGCGGGGCG	P1	306	-0.0824623	0	0.109155
CKAP5	chr3	46867491	+	24	GGCGCGGGTGGCAGCGTCCGC	P1	300	-0.0559229	0	0.0243996
CKAP5	chr3	46867545	+	24	GTGTGCGGCGGAGGCCGGGGT	P1	246	-0.254716	0	0.036978
CKAP5	chr3	46867551	+	24	GCGCTCGTGTGCGGCGGAGGC	P1	240	0.0798085	0	0.00844252
CKAP5	chr3	46867558	+	24	GGCGTGGGCGCTCGTGTGCGG	P1	233	0.642715	0	0.459791
CKAP5	chr3	46867607	+	24	GCGGCGAAGCGAGCCGGAGGC	P1	184	0.168502	0	0.0532273
CKAP5	chr3	46867805	+	23	GCGGCCCAAGCGGTTTCAAA	P1	-14	1.50641	0	0.320949
CKAP5	chr3	46867523	-	24	GCTGCCACCCGCGCCACGCTG	P1	268	0.524272	0	0.253341
CKAP5	chr22	46867652	-	24	GCCTCAGACCTGCCGGGTTCG	P1	139	0.601628	0	0.0284854
CKAP5	chr22	46867735	-	24	GCGCGCGATGCCTGCACTCGA	P1	56	0.0769657	0.408333	0.221798
CLSPN	chr22	36235282	+	24	GGCCTCGAGACTCGGCCGGGA	P1P2	277	0.282278	0	0.0307565
CLSPN	chr22	36235385	+	24	GCCGGGCACCGAGAGGTTAGG	P1P2	174	0.238131	0.1	0.14356
CLSPN	chr22	36235420	+	23	GTTTATGCACACGCCCCCCA	P1P2	139	-0.0119198	0.356522	0.457351
CLSPN	chr22	36235463	+	23	GGGGAGGCAGAAGTCATGAC	P1P2	96	0.247595	0.704348	0.238675
CLSPN	chr22	36235519	+	24	GAGCCGCTGCTCTCCGGCTGA	P1P2	40	1.0658	0.3	0.0631801
CLSPN	chr22	36235353	-	24	GGGAGCCGCAGTCCTCCCGCC	P1P2	206	0.0454017	0	0.4263
CLSPN	chr22	36235371	-	24	GCCCGGGCGCCTCGGGTCAGC	P1P2	188	-0.0237077	0	0.0211823
CLSPN	chr22	36235382	-	22	GGGTCAGCGGGGTCTACCC	P1P2	177	0.867955	0	0.15168
CLSPN	chr20	36235500	-	23	GCCTCCCCTGCGCTCCACTA	P1P2	59	1.06625	0.73913	0.394598
CLSPN	chr20	36235529	-	24	GCTGTCTCTGATTCCCTCAGC	P1P2	30	0.721481	0.316667	0.0947054
CLTC	chr20	57697281	+	24	Ggagagccgcaatggcggaac	P1P2	-21	0.923752	0	0.131046
CLTC	chr20	57697287	+	24	Gggccaggagagccgcaatgg	P1P2	-15	0.788372	0	0.193313
CLTC	chr20	57697323	+	23	Gacgaaagagctcgggtcgg	P1P2	21	0.822597	0	0.193313
CLTC	chr20	57697455	+	24	GTTATGGTCTCCTCCtgtcac	P1P2	153	0.15061	0	0.457467
CLTC	chr20	57697481	+	24	GAATCTGGGCCATGGCGCTGT	P1P2	179	-0.0188392	0	0.0335505
CLTC	chr20	57697203	-	24	GTGGAGGGGTACATAAGGCGG	P1P2	-99	0.0365356	0.104167	0.418598
CLTC	chr20	57697211	-	24	GTACATAAGGCGGAGGGGGTG	P1P2	-91	0.0103484	0.0583333	0.00635341
CLTC	chr20	57697251	-	23	GTCGCCGGGATCCTTCCGCT	P1P2	-51	0.581179	0.1	0.187899
CLTC	chr17	57697298	-	22	GCGCCCggttccgccattg	P1P2	-4	0.909366	0	0.258321
CLTC	chr17	57697376	-	22	Gtttcctgcgtccccggag	P1P2	74	0.460277	0.368182	0.193313
CNBP	chr17	128902474	+	23	GCTGCGTCAGGCGGGAAGCT	P1P2	255	0.237905	0	0.467802
CNBP	chr17	128902519	+	23	GAGCGGCGAGGTGGCGATGG	P1P2	210	0.753176	0	0.134609
CNBP	chr17	128902617	+	24	GCGGGCCCGCTCCGACGCGGA	P1P2	112	0.314338	0	0.0449085
CNBP	chr17	128902710	+	24	GACCCGCGTGTGGCGCAGGCA	P1P2	19	1.0223	0	0.0244891
CNBP	chr17	128902744	+	24	GCCGTGCGCAGCGGCGTATGT	P1P2	-15	0.927284	0	0.01672
CNBP	chr17	128902518	-	24	GCAGAGGCGCAGGCCAAAGTG	P1P2	211	1.05042	0	0.331442
CNBP	chr17	128902692	-	24	GGAAGACGGCTCGCAAGGTAG	P1P2	37	0.877576	0	0.39904
CNBP	chr17	128902708	-	24	GGTAGAGGCTGTTTATTTTGA	P1P2	21	0.049598	0	0.607141
CNBP	chr6	128902742	-	23	GCCACACGCGGGTCTGCACA	P1P2	-13	0.726707	0	0.351164
CNBP	chr6	128902812	-	23	GCCAATCAGCGCGCGGGGTT	P1P2	-83	-0.0938492	0	0.03994
COPS2	chr6	49447692	+	24	GCGCAGGGAATGGAACTCTGA	P1P2	79	0.0409189	0.729167	0.197845
COPS2	chr6	49447709	+	24	GACTACGACCTGGTGAGGCGC	P1P2	62	0.0970721	0.229167	0.0598381
COPS2	chr6	49447715	+	24	GAGGAGGACTACGACCTGGTG	P1P2	56	0.7248	0.2	0.077606
COPS2	chr6	49447826	+	24	GAGAGTGACGCCTCTGAGCCG	P1P2	-55	0.0758985	0.191667	0.836911
COPS2	chr6	49447872	+	24	GCAGGAAACAGCTCCTCTAAG	P1P2	-101	0.035631	0.120833	0.12602
COPS2	chr6	49447577	-	24	GCCCGGGCCCGGTGCGGGAAC	P1P2	194	1.34416	0	0.00540292
COPS2	chr6	49447625	-	23	GCACTGAGAGAGGCTGTAAA	P1P2	146	0.361187	0.0608696	0.846725
COPS2	chr6	49447641	-	24	GTAAACGGCACATGCTCTACG	P1P2	130	0.0798469	0.125	0.616547
COPS2	chr12	49447653	-	23	GCTCTACGGGGAGAggccgc	P1P2	118	0.931037	0.369565	0.261363
COPS2	chr12	49447789	-	24	GTCAGACATCTTGGCCGGGAG	P1P2	-18	0.700089	0.2	0.266307
COPS5	chr12	67974265	+	22	GCGAGGTAAAGTTGCGTCT	P1P2	90	0.328529	1.91818	0.260258
COPS5	chr12	67974311	+	23	GTTTGTTCCCGTGGTGCGGA	P1P2	44	0.11362	0.165217	0.501729
COPS5	chr12	67974372	+	24	GGTCTCTACCAACTTCACCTC	P1P2	-17	0.51725	0.179167	0.210349
COPS5	chr12	67974419	+	24	GCTGTTTATATCGTCATGTCC	P1P2	-64	0.0482367	0.354167	0.150557
COPS5	chr12	67974325	-	23	GGCCTTGACCCTCCGCACCA	P1P2	30	1.21184	0.126087	0.112659
COPS5	chr12	67974378	-	23	GCCATGACACCTAGAACCGG	P1P2	-23	0.615278	0.104348	0.456855
COPS5	chr12	67974403	-	24	GAAGTTGGTAGAGACCATTCA	P1P2	-48	1.17289	0.2	0.293427
COPS5	chr12	67974411	-	25	GTAGAGACCATTCAGGGAAGAC	P1P2	-56	0.20943	0.2	0.078817
COPS5	chr6	67974572	-	24	GAGTGGTATAGTCTTCCGCAC	P1P2	-217	0.0297012	0.283333	0.716751
COPS5	chr6	67974580	-	22	GTCTTCCGCACCGGAAGAA	P1P2	-225	0.228555	0.363636	0.511122
COX6C	chr6	100905105	+	24	GATCTGACAGGGTTGTCGCGA	P1P2	791	-0.0257705	1.1625	0.0704096
COX6C	chr6	100905163	+	24	GCGTTCCCGTCCAGGTTTTAA	P1P2	733	0.0466407	0.641667	0.287004
COX6C	chr6	100905172	+	24	GTATTTGCCGCGTTCCCGTCC	P1P2	724	0.0389369	0.370833	0.0565683
COX6C	chr6	100905195	+	24	GTTAGGGAATTTGGGCCCTCA	P1P2	701	0.105533	0.266667	0.140292
COX6C	chr6	100905212	+	24	GGCTGGGCAAAGGAGCAGTTA	P1P2	684	0.0847512	0.225	0.188931
COX6C	chr6	100905234	+	23	GCCCCTTAGGTCTTTAGGTG	P1P2	662	0.0918922	0.421739	0.157362
COX6C	chr6	100905355	+	24	GGTCACCGTACCTGCCGCAGG	P1P2	541	0.229648	0.358333	0.102878
COX6C	chr6	100905636	+	22	GGCCCCACcgaagccgggt	P1P2	260	0.671511	0.0772727	0.295508
COX6C	chr2	100905641	+	22	GCGACGGCCCCACcgaagc	P1P2	255	0.244277	0.0454545	0.275541
COX6C	chr2	100905665	+	22	GCGGACCACGGACCGGGGT	P1P2	231	0.976103	0	0.0864964
COX6C	chr2	100905671	+	24	GGCGGCGGGCGGACCACGGAC	P1P2	225	0.9038	0	0.114259
COX6C	chr2	100906042	+	24	Gcccgttttgcaaggtcacac	P1P2	-146	0.0462307	1.06667	0.193313
COX6C	chr2	100906051	+	24	Ggaggtcaagcccgttttgca	P1P2	-155	0.0202775	1.56667	0.193313
COX6C	chr2	100906180	+	23	GCCAAACGGTTATTCGCGTA	P1P2	-284	0.000397557	0.595652	0.0658387
COX6C	chr2	100906275	+	24	GTAGTGCCCACTGCATGGGAT	P1P2	-379	0.0103619	2.00417	0.416555
COX6C	chr2	100905202	-	24	GGGAACGCGGCAAATACCATG	P1P2	694	0.14026	0.283333	0.301258
COX6C	chr2	100905304	-	24	GCCTTCAGCTAACGCGGCCGG	P1P2	592	0.15262	0.416667	0.298914
COX6C	chr2	100905323	-	24	GGGGGTAGGATGGGAAGCCGT	P1P2	573	0.0954086	0.470833	0.126674
COX6C	chr1	100905654	-	23	GcagcccacccggcttcgGT	P1P2	242	0.129391	0.117391	0.0773749
COX6C	chr1	100905674	-	23	GGGGCCGTCGCAACCCACCC	P1P2	222	0.865492	0	0.235575
COX6C	chr1	100905704	-	24	GTCCGCCCGCCGCCCTCCCTC	P1P2	192	0.827532	0	0.0998431
COX6C	chr1	100905736	-	24	GAAGCGTGAGAGAGTAGATGC	P1P2	160	0.542934	0	0.150933
COX6C	chr1	100905741	-	24	GTGAGAGAGTAGATGCGGGAG	P1P2	155	0.659703	0	0.0962653
COX6C	chr1	100905836	-	23	GTTGTGACAACCCGCAGTGT	P1P2	60	1.1201	1.71304	0.180561
COX6C	chr1	100906207	-	22	GCGAATAACCGTTTGGCTT	P1P2	-311	0.00995935	0.536364	0.135959
CREB1	chr1	208394585	+	25	GCTAGGCCCGGAGCAGCTCGAG	P1P2	-107	0.296062	0	0.0588406
CREB1	chr1	208394599	+	23	GGAAACAGCCGAGCTAGGCC	P1P2	-93	0.624511	0	0.262674
CREB1	chr1	208394620	+	23	GAGTGCGCAGCGGCCGCGCA	P1P2	-72	0.410363	0	0.14075
CREB1	chr1	208394668	+	24	GCCGACTGAGGAGCCGCAGCC	P1P2	-24	0.20179	0	0.100597
CREB1	chr10	208394629	-	22	GCTCGGCTGTTTCCGTGCG	P1P2	-63	0.5634	0	0.454646
CREB1	chr10	208394651	-	24	GGCCGCTGCGCACTCGGCACT	P1P2	-41	0.739792	0	0.0440792
CREB1	chr10	208394660	-	24	GCACTCGGCACTGGGCGGCGC	P1P2	-32	1.03445	0	0.0244603
CREB1	chr10	208394726	-	25	GCTGCCTGTGGCCCGGGCGGCT	P1P2	34	0.00119118	0	0.006589
CREB1	chr10	208394742	-	25	GCGGCTGGGAGAAGCGGAGTGT	P1P2	50	0.424897	0	0.0695577
CREB1	chr10	208394754	-	24	GCGGAGTGTTGGTGAGTGACG	P1P2	62	1.22576	0.0333333	0.2348
CREBBP	chr10	3930470	+	24	Gcggcggcggaacggggggtg	P1P2	211	0.0353286	0	0.193313
CREBBP	chr10	3930535	+	24	GgccccgctcGCCTCTCGGCT	P1P2	146	0.815351	0	0.210273
CREBBP	chr10	3930647	+	23	GGCTTCGAGCGCGATCTACT	P1P2	34	0.909687	0.0869565	0.265144
CREBBP	chr10	3930447	-	22	GAAAAACAATGCGCCGAGC	P1P2	234	-0.0275833	0	0.0737341
CREBBP	chr20	3930554	-	24	GAGGCCGAGCCGAGAGGCgag	P1P2	127	1.27496	0	0.173952
CREBBP	chr20	3930628	-	23	Gcggggtgcgcgggcggttg	P1P2	53	0.33139	0	0.193313
CREBBP	chr20	3930635	-	23	Gcgcgggcggttgtggggcc	P1P2	46	0.195999	0	0.193313
CREBBP	chr20	3930645	-	24	Gttgtggggcccgggaccggc	P1P2	36	0.196567	0	0.193313
CREBBP	chr20	3930677	-	24	GATCGCGCTCGAAGCCCCGGT	P1P2	4	0.780991	0.1	0.504031
CREBBP	chr20	3930693	-	21	GTCGGGTCCGCGACAAGA	P1P2	-12	0.435139	0.0238095	0.140178
CTCF	chr20	67596259	+	22	GCGGGCGCGATGGCGTCAC	P1P2	-238	0.230865	0	0.0391986
CTCF	chr20	67596319	+	24	GgtgaggggaggggTTGGCGC	P1P2	-178	-0.121614	0	0.0931772
CTCF	chr20	67596356	+	24	Gaccggccgggcggcgagtag	P1P2	-141	1.34532	0	0.193313
CTCF	chr20	67596386	+	24	GGTGCTGATaagggaagggac	P1P2	-111	0.958127	0	0.317469
CTCF	chr20	67596392	+	24	GCCGCGGGTGCTGATaaggga	P1P2	-105	0.191955	0	0.480765
CTCF	chr20	67596426	+	23	GCGGTGCAGTGCGCCTGCGT	P1P2	-71	0.203692	0	0.0930973
CTCF	chr20	67596302	-	24	GCTTTTGAAAGTTGGCGCCCG	P1P2	-195	0.106141	0	0.329456
CTCF	chr20	67596435	-	23	GGCCCCGGCAGCGCCGACGC	P1P2	-62	0.696557	0	0.0355268
CTCF	chr20	67596498	-	24	GTGGAGCGATTAAACCGTGCG	P1P2	1	0.467232	0	0.593016
CTCF	chr20	67596515	-	23	GCGCGGAGCTGCTTCTTTgg	P1P2	18	0.213879	0	0.349726
CUL2	chr20	35378997	+	23	GAGAGGAGTTGGGGGCGACG	P1P2	244	0.23783	0	0.294676
CUL2	chr20	35379234	+	24	GTAATGGCAGCGCTGTGAGCA	P1P2	7	0.374445	0	0.0387943
CUL2	chr20	35379251	+	24	GgcggccTCGGCGCACAGTAA	P1P2	-10	1.44119	0	0.196485
CUL2	chr20	35379339	+	23	GACAGGTGAGTGTCGGCGCG	P1P2	-98	0.00959377	0	0.260714
CUL2	chr20	35379363	+	24	GGACTTTGCTGTCTTTCCTCG	P1P2	-122	0.525235	0	0.781052
CUL2	chr20	35379490	+	24	GTGTGTGTTGGGCAAAGCCGG	P1P2	-249	0.0140054	0.0166667	0.502287
CUL2	chr20	35379558	+	24	GCGGCCTGTACCATTGCTTTC	P1P2	-317	-0.0303372	0.00416667	0.245058
CUL2	chr20	35379269	-	23	GCTGCCATTACTGTGCGCCG	P1P2	-28	0.695595	0	0.745535
CUL2	chr6	35379281	-	23	GTGCGCCGAggccgcctccc	P1P2	-40	0.576687	0	0.503645
CUL2	chr6	35379298	-	27	Gcctccccggccggccgccgccac	P1P2	-57	0.863216	0	0.193313
CUL2	chr6	35379312	-	25	GccgccaccggccccggAGACG	P1P2	-71	0.158707	0	0.361991
CUL2	chr6	35379320	-	24	GgccccggAGACGCGGGGGGT	P1P2	-79	0.0321655	0	0.0599377
CUL2	chr6	35379333	-	28	GACGCGGGGGGTGGGGAGCGAAGCC	P1P2	-92	0.184119	0	0.0143401
CUL2	chr6	35379335	-	25	GGGGGGTGGGGAGCGAAGCCCG	P1P2	-94	-0.0736374	0	0.135775
CUL2	chr6	35379416	-	24	GCCGCCGCTCCCCGGCGGGAC	P1P2	-175	0.143213	0.104167	0.00998004
CUL3	chr6	225449978	+	23	GAGCCGAGCCGGACGTGAGG	P1P2	35	1.02063	0	0.205189
CUL3	chr6	225450000	+	21	GCGGAGGAGCGCGATAAA	P1P2	13	0.891394	0	0.188895
CUL3	chr6	225449791	-	24	GCGACGCCGGTGTCACATTTA	P1P2	222	0.300825	0	0.011509
CUL3	chr6	225449799	-	24	GGTGTCACATTTAAGGCGGGC	P1P2	214	-0.0717581	0	0.20342
CUL3	chr6	225449819	-	22	GGCAGGCTAGGGGCGACGC	P1P2	194	-0.0722317	0	0.0371383
CUL3	chr6	225449941	-	23	GGACTCTGGCGACTCCGATG	P1P2	72	1.08798	0	0.167793
CUL3	chr6	225449949	-	24	GGCGACTCCGATGCGGCTGGG	P1P2	64	0.644153	0	0.478079
CUL3	chr6	225449997	-	24	GGGTCCCCCTCACGTCCGGCT	P1P2	16	0.750285	0	0.197962
CUL3	chr6	225450031	-	23	GCGCTCCTCCGCGATGGCGG	P1P2	-18	0.405898	0	0.625749
CUL3	chr6	225450064	-	23	GGACAAACATCTCACTGCGC	P1P2	-51	0.106143	0	0.165306
CYCS	chr5	25164679	+	26	GGGAGGGCGGGGAGTGAAGACCC	P1P2	192	0.787978	0.126923	0.0140252
CYCS	chr5	25164695	+	26	GGAGCCCGCGCTGGGTGGGAGGG	P1P2	176	0.746388	0.226923	0.0343794
CYCS	chr5	25164707	+	24	GCATTCGAGTGGAGCCCGCGC	P1P2	164	0.156759	0.241667	0.0587278
CYCS	chr5	25164734	+	23	GCGAGCGACCGAAACCCAAG	P1P2	137	0.802199	0.330435	0.659038
CYCS	chr5	25164781	+	24	GCGGAGGCCGCACCTGGTTAG	P1P2	90	0.965704	0.375	0.151858
CYCS	chr5	25164807	+	23	GACTAAAAAGAGGTGAGAGC	P1P2	64	1.12645	0.573913	0.304068
CYCS	chr5	25164817	+	24	GTTGTGCCAGCGACTAAAAAG	P1P2	54	0.907845	0.383333	0.637737
CYCS	chr5	25164748	-	24	GAATGCTCCCCGCTTGGGTTT	P1P2	123	0.871356	0.25	0.277511
CYCS	chr5	25164915	-	23	GCCGGTCCGCGCTTAAGTAC	P1P2	-44	0.137402	0.191304	0.369888
CYP51A1	chr5	91763671	+	23	GTTTCCGACGGAGTGAATGG	P1P2	60	0.963272	1.2913	0.57952
CYP51A1	chr17	91763777	+	24	GGCTGGGTTTAGTAGGAGACC	P1P2	-46	1.02657	0.304167	0.0423507
CYP51A1	chr17	91763800	+	23	GCGCGTGGGACCCGAGGGGT	P1P2	-69	0.0983291	0.208696	0.00899707
CYP51A1	chr17	91763805	+	24	GGTGGCGCGCGTGGGACCCGA	P1P2	-74	0.964079	0.1625	0.311815
CYP51A1	chr17	91763814	+	24	GACGCACGGGGTGGCGCGCGT	P1P2	-83	-0.0320673	0.108333	0.0163576
CYP51A1	chr17	91763858	+	25	GTTATTTAAGGGGCGTGGCCAG	P1P2	-127	0.114241	0.008	0.135858
CYP51A1	chr17	91763689	-	23	GCCGCCGCCATTCACTCCGT	P1P2	42	0.271712	1.2087	0.271527
CYP51A1	chr17	91763767	-	24	GCTGGCAGATGGTCGTCCACA	P1P2	-36	1.00935	0.258333	0.180327
CYP51A1	chr17	91763847	-	25	GCCACCCCGTGCGTCACAGAAT	P1P2	-116	0.0492496	0.1	0.0542043
CYP51A1	chr17	91763864	-	24	GAATGGGGCGGGATGTTCCGC	P1P2	-133	0.111614	0.0833333	0.039008
DAP3	chr10	155658859	+	24	GCAAAAAAGGGTCGGGTCATC	P1P2	-30	0.490049	0.1	0.0167571
DAP3	chr10	155658907	+	26	GACCGACACACGCTGCCTGGGGC	P1P2	18	0.759631	0.246154	0.0689534
DAP3	chr10	155658912	+	24	GGCGACCGACACACGCTGCCT	P1P2	23	0.0101164	0.2375	0.0378953
DAP3	chr10	155659055	+	25	GGAATCCCCCCCGGAGGCGCGC	P1P2	166	0.105448	0.236	0.324444
DAP3	chr10	155658895	-	26	GACCCTTTTTTGCAGTCTCAGGA	P1P2	6	0.0234813	0.157692	0.449466
DAP3	chr10	155658904	-	24	GCAGTCTCAGGACGGGCGCTT	P1P2	15	1.45126	0.15	0.0647357
DAP3	chr10	155658917	-	24	GGGCGCTTTGGAGCCGGCCCC	P1P2	28	0.101407	0.170833	0.0973544
DAP3	chr5	155659058	-	25	GTAGGGAGTGAGGCCGGTAGAC	P1P2	169	0.249829	0.352381	0.0985557
DAP3	chr5	155659074	-	25	GTAGACCGGCGCGCCTCCGGGG	P1P2	185	0.74488	0.24	0.168813
DAP3	chr5	155659085	-	24	GCCTCCGGGGGGGATTCCTCC	P1P2	196	0.75069	0.2125	0.0317228
DCTN2	chr5	57940836	-	24	GCCGGGAAGGTCGGCGTATTT	P1P2	82	0.0639217	0.0166667	0.0041367
DCTN2	chr5	57940847	-	22	GCGTATTTAGGGTCCGCCA	P1P2	71	0.0709105	0.0681818	0.0562662
DCTN2	chr5	57940891	-	23	GACCCGGGCCTCGGTGGAGC	P1P2	27	0.605777	0.0826087	0.018487
DCTN2	chr5	57940910	-	24	GCCGGGGCCGGTGTTCGGGTA	P1P2	8	0.754141	0.00416667	0.0177281
DCTN2	chr5	57940920	-	24	GTGTTCGGGTAGGGGAGAGGC	P1P2	-2	0.076773	0	0.0494264
DCTN2	chr5	57940934	-	24	GAGAGGCTGGGTTCGGGTCCC	P1P2	-16	0.179753	0	0.0057493
DCTN2	chr5	57940943	-	24	GGTTCGGGTCCCGGGCTAAGG	P1P2	-25	1.64008	0	0.447043
DCTN2	chr4	57941078	-	24	GGATTGGGGAGAACGAGGCCA	P1P2	-160	-0.000732229	0.329167	0.868198
DCTN2	chr4	57941117	-	22	GGGACGCCGCCTAGGATTG	P1P2	-199	0.0173737	0.268182	0.0104598
DCTN2	chr4	57941132	-	24	GGATTGTGGGATGTGTAGTTT	P1P2	-214	-0.0238019	0.2375	0.0112003
DCTN3	chr4	34620304	+	23	GCAAGAGCGGTCCACTGTCC	P1P2	158	0.393164	0	0.0355362
DCTN3	chr4	34620382	+	24	GCTGGGTGTAcgggccgggcg	P1P2	80	0.0359874	0.4625	0.290004
DCTN3	chr4	34620387	+	23	GAGCGCTGGGTGTAcgggcc	P1P2	75	-0.0194606	0.443478	0.172598
DCTN3	chr4	34620453	+	23	GGGTCGGTAGTAGCGATGGC	P1P2	9	1.44002	0.0695652	0.319535
DCTN3	chr4	34620206	-	22	GCAGAGCCCCCTATGACAG	P1P2	256	-0.0605892	0.75	0.264515
DCTN3	chr4	34620264	-	24	GACCTTTGTTATTTCAAAGGC	P1P2	198	-0.00202859	0.275	0.0575192
DCTN3	chr2	34620271	-	24	GTTATTTCAAAGGCCGGGCTG	P1P2	191	0.0418764	0.166667	0.469461
DCTN3	chr2	34620302	-	24	GACTGGAGCGGTTGCATCCCG	P1P2	160	0.401161	0	0.357566
DCTN3	chr2	34620426	-	23	GCGCTCCAGCTCTTCCACTC	P1P2	36	1.15882	0.4	0.134766
DCTN3	chr2	34620526	-	23	GGACGTCAGTCCAAATAAGA	P1P2	-64	0.214649	0	0.3712
DCTN4	chr2	150138389	+	23	GTCGCCCTATAGCGAGTATG	P1P2	162	0.0171654	0.252174	0.123357
DCTN4	chr2	150138528	+	24	GCGTCCTTGCTGCAGTCGGAC	P1P2	23	1.36367	0.1	0.136803
DCTN4	chr2	150138599	+	24	GCGAGGAAGACGCTGGCTCTC	P1P2	-48	0.0940727	0.0708333	0.0233415
DCTN4	chr2	150138607	+	23	GAAGGCAGCGAGGAAGACGC	P1P2	-56	0.187053	0.0391304	0.339248
DCTN4	chr2	150138617	+	24	GAAGTCGTAGGGAAGGCAGCG	P1P2	-66	0.127785	0	0.541357
DCTN4	chr2	150138465	-	24	GACCGCAGTTCGCTACAATAG	P1P2	86	0.914859	2.34583	0.342642
DCTN4	chr13	150138490	-	23	GAAGTAGAGTTGCGAGAGCG	P1P2	61	0.548271	4.45217	0.35745
DCTN4	chr13	150138513	-	24	GCCCGAACCTTCTTTTCTCCC	P1P2	38	-0.025057	1.02083	0.104485
DCTN4	chr13	150138547	-	24	GAACCCGGTCCGACTGCAGCA	P1P2	4	0.721475	0.1	0.279809
DCTN4	chr13	150138565	-	24	GCAAGGACGCCATCTTGGGGA	P1P2	-14	0.242457	0.075	0.149034
DDX11	chr13	31226729	+	22	GCAGCAGCGAGAATCTACA	P1P2	-105	1.14777	0.0818182	0.741792
DDX11	chr13	31226799	+	24	GTCCCCTCAGTGAAAGGCAGC	P1P2	-35	0.871484	0.00555556	0.105808
DDX11	chr13	31226823	+	23	GCCACTGAGTTAGAAACTGG	P1P2	-11	0.206332	0	0.39354
DDX11	chr13	31227012	+	24	GGGCCACCCACCTTTGCAAAT	P1P2	178	0.245908	0.15	0.191774
DDX11	chr13	31226818	-	26	GTTGTTCCGGCTGCCTTTCACTG	P1P2	-16	0.980748	0.032	0.179006
DDX11	chr13	31226844	-	26	GGACCCGCCAGTTTCTAACTCAG	P1P2	10	-0.0359512	0	0.314295
DDX11	chr7	31226939	-	23	GTGTGGCAGCAGAGCTCCTT	P1P2	105	0.740253	0	0.0653417
DDX11	chr7	31226945	-	21	GCAGAGCTCCTTAGGACG	P1P2	111	0.53642	0	0.476185
DDX11	chr7	31227025	-	24	GCGCCGGACCCCTATTTGCAA	P1P2	191	0.276066	0.184615	0.157837
DDX11	chr7	31227029	-	23	GGACCCCTATTTGCAAAGGT	P1P2	195	0.587732	0.1875	0.571506
DDX18	chr7	118572218	+	23	GTCACAGGAACGCTGGCACC	P1P2	-127	0.696421	0.143478	0.0990543
DDX18	chr7	118572225	+	24	GGAAACGCGTCACAGGAACGC	P1P2	-120	0.0763569	0.175	0.127903
DDX18	chr7	118572233	+	24	GGCCAACAGGAAACGCGTCAC	P1P2	-112	0.021518	0.2	0.0297099
DDX18	chr7	118572202	-	23	GTCTGGAAGCATTTCCGCTC	P1P2	-143	0.139169	0.1	0.0431858
DDX18	chr7	118572273	-	24	GTTGGCCGAGCTGCGCACGTG	P1P2	-72	0.167576	0.179167	0.111845
DDX18	chr7	118572282	-	24	GCTGCGCACGTGCGGCCGGAA	P1P2	-63	0.058151	0.141667	0.0930472
DDX18	chr17	118572348	-	24	GCCTTATTCTAGGCACTTGTT	P1P2	3	1.87523	0.0916667	0.173522
DDX18	chr17	118572461	-	22	GAGATGCGTTGACTCGCGG	P1P2	116	0.428354	0.145455	0.590804
DDX18	chr17	118572488	-	23	GAAGACCCACGCGCGAGCCC	P1P2	143	0.144508	0.1	0.10548
DDX18	chr17	118572505	-	24	GCCCTGGCGCGTTCGGGCGGC	P1P2	160	0.0136033	0.1	0.00648164
DDX23	chr17	49245687	+	23	GCGGGCCCCAGGGGTAGTGT	P1P2	229	0.535832	0.317391	0.0628709
DDX23	chr17	49245729	+	23	GGCATGAACCCGGGAAGCTC	P1P2	187	1.07377	0.108696	0.0417769
DDX23	chr17	49245796	+	24	GCTAGAGTCAGGGCACGGCGG	P1P2	120	0.205206	1.18333	0.354912
DDX23	chr17	49245820	+	23	GTTCCCACGAGCTTACAGAA	P1P2	96	0.310446	0.713044	0.323629
DDX23	chr17	49245868	+	24	GCGTTGGGCGGTTCAGACTCA	P1P2	48	0.790529	0.0625	0.202208
DDX23	chr17	49245881	+	23	GACGTTGAGGCCGCGTTGGG	P1P2	35	1.1357	0.1	0.157824
DDX23	chr13	49245931	+	22	GGTGTTCATCTCCGCGACC	P1P2	-15	0.371584	0.177273	0.0788729
DDX23	chr13	49245786	-	24	GCGTTCTTTCCCGCCTCATCC	P1P2	130	0.0266411	0.466667	0.0870686
DDX23	chr13	49245858	-	24	GTGGGAACCGCCTCCACCGCC	P1P2	58	0.0422805	0.404167	0.217558
DDX23	chr13	49245935	-	24	GTCGCCATCTTTCCCGTTTCC	P1P2	-19	0.024718	0.0208333	0.0618228
DDX54	chr13	113623051	+	23	GTGGGGCTGGGACGCATGTT	P1	201	0.246831	0	0.0283832
DDX54	chr13	113623070	+	23	GGGCCCGGAAGGTAGGCGCG	P1	182	0.05156	0	0.226177
DDX54	chr13	113623077	+	23	GACGCCCGGGCCCGGAAGGT	P1	175	0.166092	0	0.00539393
DDX54	chr13	113623204	+	24	GACCTCGGTCGCGAGCTGCCA	P1	48	0.227547	0	0.0800206
DDX54	chr13	113623252	+	24	GTTCCCAGCGCGCGGCCCGAA	P1	0	1.10844	0	0.0964141
DDX54	chr13	113623048	-	24	GCGCTGCCCGGAGCCGGGTCT	P1	204	-0.0096773	0	0.0101463
DDX54	chr2	113623149	-	23	GTCCTCCGAGTCGCTGCCGC	P1	103	0.016138	0.1	0.0487516
DDX54	chr2	113623178	-	24	GAGGCCGCGCCTCGGCGCTTC	P1	74	0.007043	0	0.00922743
DDX54	chr2	113623259	-	23	GGCCCTTGTCGGCCGCCATT	P1	-7	0.469099	0	0.176066
DDX54	chr2	113623271	-	24	GCCGCCATTCGGGCCGCGCGC	P1	-19	-0.0213159	0	0.0768831
DDX6	chr2	118661327	+	23	GAGTAGCTTTATCGAAGATG	P1P2	501	0.109967	0.573913	0.0528966
DDX6	chr2	118661370	+	24	GTGGTGCGCAGCAGGGTCGGC	P1P2	458	-0.0477243	2.31667	0.0558351
DDX6	chr2	118661554	+	26	GAGTCGCGAGGCTTGGGGTGAGG	P1P2	274	0.0928111	0.207692	0.0504675
DDX6	chr2	118661562	+	23	GGCCCGAGTCGCGAGGCTTG	P1P2	266	0.133287	0.130435	0.0557216
DDX6	chr2	118661569	+	23	GGACACGGGCCCGAGTCGCG	P1P2	259	0.430705	0.121739	0.164228
DDX6	chr2	118661584	+	23	GTGGCCTCGTTGGTAGGACA	P1P2	244	0.0891329	0.186957	0.148423
DDX6	chr17	118661594	+	24	GCCGAGCGGGAGTGGCCTCGT	P1P2	234	0.712532	0.154167	0.00633944
DDX6	chr17	118661603	+	25	GACCGAGGGTGCCGAGCGGGAG	P1P2	225	0.444205	0.08	0.031655
DDX6	chr17	118661671	+	24	GgcgggCGGAGGTTTCCGAGG	P1P2	157	1.34956	0	0.464559
DDX6	chr17	118661700	+	23	Ggaggccgtagcgagagggc	P1P2	128	0.814798	0	0.193313
DDX6	chr17	118661779	+	24	GGGCTGGACAGCCGGGGGAGC	P1P2	49	0.0977032	0	0.00741352
DDX6	chr17	118661510	-	24	GAGAGTCCCCCAGAGCCGGCC	P1P2	318	0.0682569	0.0708333	0.0590048
DDX6	chr17	118661602	-	28	GACTCGGGCCCGTGTCCTACCAACG	P1P2	226	-0.0294906	0.153571	0.465741
DET1	chr17	89089610	+	24	GCCCCAGGCTTTTCTTTCCGG	P1P2	250	0.0857863	0	0.398545
DET1	chr17	89089809	+	24	GAGGCGCGCACAGAACAGGCT	P1P2	51	0.607505	0	0.0468058
DET1	chr17	89089865	+	24	GGAACGTGCAGCCGCGGGTGC	P1P2	-5	0.948479	0	0.0141382
DET1	chr10	89089872	+	24	GGAAACGGGAACGTGCAGCCG	P1P2	-12	0.423383	0.025	0.32968
DET1	chr10	89089888	+	23	GTTCCGGTGGCTGGCGGAAA	P1P2	-28	0.217844	0.0913044	0.0362889
DET1	chr10	89089894	+	23	GCCGCAGTTCCGGTGGCTGG	P1P2	-34	0.299774	0.1	0.133738
DET1	chr10	89089735	-	24	GCCTGCCGGGGAGGGTCTGAC	P1P2	125	1.01268	0.4125	0.0320574
DET1	chr10	89089748	-	24	GGTCTGACGGGCTTGGAGGCT	P1P2	112	0.12049	0.620833	0.00249514
DET1	chr10	89089798	-	23	GGTCCGGGCTCAAAGAGCCA	P1P2	62	1.03884	0.1	0.876427
DET1	chr10	89089907	-	24	GTTCCCGTTTCCGCCAGCCAC	P1P2	-47	0.0814497	0.0708333	0.135581
DHCR24	chr10	55352855	+	24	GCTACAGGCGCAGAGCGGGCC	P1P2	-21	0.47204	0	0.0570313
DHCR24	chr10	55352860	+	23	GTGGGCTACAGGCGCAGAGC	P1P2	-26	1.10199	0	0.0187927
DHCR24	chr10	55352871	+	24	GCTCCCCGGGCTGTGGGCTAC	P1P2	-37	1.18021	0	0.000830708
DHCR24	chr5	55352879	+	24	GATCCCGGGCTCCCCGGGCTG	P1P2	-45	0.241369	0	0.0138949
DHCR24	chr5	55352886	+	24	GGCGGGCGATCCCGGGCTCCC	P1P2	-52	0.717799	0	0.0280116
DHCR24	chr5	55352908	+	23	GACCCGAGCCAATCGCGAGG	P1P2	-74	0.470277	0	0.309062
DHCR24	chr5	55352671	-	24	GATATCGAAGATAAGCGAGAG	P1P2	163	0.331209	0.141667	0.542638
DHCR24	chr5	55352705	-	23	GGCACACGAACACCCAGCGC	P1P2	129	0.395364	0.295652	0.107537
DHCR24	chr5	55352820	-	23	GCGCCGCGCGGTAAGCGCTG	P1P2	14	0.700016	0	0.328268
DHCR24	chr5	55352922	-	24	GATCGCCCGCCGCCTCGCGAT	P1P2	-88	-0.102405	0	0.0566067
DHX16	chr5	30640559	+	23	GACGAGCTGCACTCGGTGTT	P1P2	202	0.297253	0.0173913	0.0147432
DHX16	chr5	30640566	+	24	GGGTTCAGGACGAGCTGCACT	P1P2	195	0.110288	0	0.447603
DHX16	chr5	30640588	+	22	GCCGGCGGGTCTGGAGCGC	P1P2	173	0.547349	0	0.00145833
DHX16	chr2	30640631	+	24	GACGCTTCAGGGCCGGGAGCA	P1P2	130	0.102113	0.05	0.097584
DHX16	chr2	30640638	+	24	GCTGCCCGACGCTTCAGGGCC	P1P2	123	0.0542305	0.1375	0.0188933
DHX16	chr2	30640643	+	24	GCGCGGCTGCCCGACGCTTCA	P1P2	118	0.245003	0.225	0.0564813
DHX16	chr2	30640731	+	23	GGAAGATCCTAGAGGTCCCA	P1P2	30	1.82018	0.986956	0.283217
DHX16	chr2	30640739	+	23	GGGATGTCGGAAGATCCTAG	P1P2	22	0.632469	0.847826	0.841014
DHX16	chr2	30640759	+	24	GCGGTACGGGAAGACAGCTTT	P1P2	2	0.132927	0.291667	0.035972
DHX16	chr2	30640538	-	24	GTGCGGTACCGATCAGAAACT	P1P2	223	0.424219	1.60833	0.390176
DICER1	chr2	95602887	+	24	GAAAATAAGAAACTAGagcct	P1P2	20795	-0.0323236	0.575	0.121674
DICER1	chr2	95602928	+	24	GTATGCCCATCAGCTTAGGTT	P1P2	20754	0.011691	1.27083	0.0848939
DICER1	chr15	95607893	+	23	GAGAATGTCTTTTAAAGGAC	P1P2	15789	0.00475599	1.06957	0.206684
DICER1	chr15	95607987	+	24	GTATATGCCAAAGTAGTGATA	P1P2	15695	0.0420186	0.633333	0.123664
DICER1	chr15	95608018	+	24	GAACTTAGAATCAGCATTTTG	P1P2	15664	-0.0136067	0.416667	0.0503275
DICER1	chr15	95623523	+	23	GCAGCTTTGTGTCCGGGGCG	P1P2	159	0.190122	0	0.33563
DICER1	chr15	95623588	+	21	GGGTCCGATGGTTCTCGA	P1P2	94	0.230465	0	0.0880993
DICER1	chr15	95623606	+	23	GTGACGCGCGCGCCGGAGCG	P1P2	76	0.0224126	0	0.169465
DICER1	chr15	95623665	+	23	GAGCGCGAGGAAATggcggc	P1P2	17	0.189833	0	0.530988
DICER1	chr15	95623672	+	24	GCGACGGCGAGCGCGAGGAAA	P1P2	10	0.514182	0	0.0854944
DICER1	chr15	95623695	+	23	GTAACCTGACAGCGGGGACG	P1P2	-13	0.760537	0	0.419734
DICER1	chr15	95623701	+	24	GAATGGAGTAACCTGACAGCG	P1P2	-19	1.11902	0	0.603292
DICER1	chr10	95623719	+	24	GCTGCTGCAGGCCCAGGTGAA	P1P2	-37	1.06049	0	0.0269648
DICER1	chr10	95624055	+	24	GGCAACTGCGGCCCAACGCCA	P1P2	-373	0.82049	0	0.395384
DICER1	chr10	95624095	+	24	GGCCTCGGCGCGCGGGTTCCC	P1P2	-413	0.592283	0.258333	0.04236
DICER1	chr10	95624204	+	22	GCTCTCCGGGAAACAATTA	P1P2	-522	0.123506	0.1	0.140565
DICER1	chr10	95624270	+	23	GCGAGGAAACGCAGGCGAGT	P1P2	-588	0.588889	0.0478261	0.152562
DICER1	chr10	95624287	+	23	GCCCCTGCACCACTAACGCG	P1P2	-605	0.0600356	0.404348	0.736663
DICER1	chr10	95624309	+	22	GTTATTTCCCCAAATGCGG	P1P2	-627	0.0293314	0.854545	0.539885
DICER1	chr10	95602964	-	24	GATGGGCATACAACTTACCCC	P1P2	20718	0.016649	1.62083	0.344949
DICER1	chr10	95607857	-	23	GCCTCCACTACCATAAGCTC	P1P2	15825	-0.040883	1.18261	0.219247
DICER1	chr10	95608003	-	23	GGGCAACCTTATCACTACTT	P1P2	15679	-0.0144554	0.647826	0.166267
DICER1	chr11	95608080	-	24	GTCTGTATTAATTCATACCCT	P1P2	15602	-0.0129318	0.316667	0.322481
DICER1	chr11	95623494	-	24	GCCGGCACGCGGGCCTCCGCG	P1P2	188	0.254386	0	0.681689
DICER1	chr11	95623604	-	22	GCGGGCCTTCGAGAACCAT	P1P2	78	0.110956	0	0.223567
DICER1	chr11	95624090	-	24	GCCGCAGTTGCCCGGAGTTTT	P1P2	-408	-0.00074036	0	0.00883595
DICER1	chr11	95624099	-	24	GCCCGGAGTTTTTGGGGCCCC	P1P2	-417	-0.0387075	0	0.00941937
DICER1	chr11	95624300	-	24	GCCTGCGTTTCCTCGCGTTAG	P1P2	-618	-0.0168836	0.141667	0.0625841
DLGAP5	chr11	55658103	+	24	GTCTAGAAGGGTCTGAGGACC	P1P2	149	1.29374	0.4625	0.00587355
DLGAP5	chr11	55658117	+	23	GCTTCCGTTGAAGGTCTAGA	P1P2	135	0.761386	0.730435	0.458636
DLGAP5	chr11	55658250	+	23	GAGGGTTCCTGCTTCGGAGT	P1P2	2	0.944871	0.1	0.121682
DLGAP5	chr11	55658256	+	24	GGGTTGTGAGGGTTCCTGCTT	P1P2	-4	0.453002	0.1	0.144408
DLGAP5	chr10	55658286	+	24	GTGCGGCAAGTTTGAATTTCG	P1P2	-34	0.144522	0.1	0.0852152
DLGAP5	chr10	55658314	+	24	GGTTAAAGCCCCTCCAATCAG	P1P2	-62	0.385652	0.0125	0.776438
DLGAP5	chr10	55658360	+	24	GCAAGCCTCGTTGAGTGGAAG	P1P2	-108	0.166407	0.0458333	0.161336
DLGAP5	chr10	55658327	-	22	GCACCGAGCCGCTGATTGG	P1P2	-75	0.704364	0.0545455	0.0585103
DLGAP5	chr10	55658349	-	23	GGGCTTTAACCAACACTTCC	P1P2	-97	0.0446682	0	0.0267084
DLGAP5	chr10	55658423	-	24	GCGATATTTGAATTGATTGAA	P1P2	-171	0.112419	0.166667	0.0262489
DLST	chr10	75348587	+	24	GACAACAACCGGAAGTGGGGC	P1P2	-69	0.0778479	0	0.195415
DLST	chr10	75348610	+	23	GCGGACACCGGATATAGGGC	P1P2	-46	0.704139	0	0.324684
DLST	chr10	75348636	+	24	GCATCACGGCGGAGGAGCCGA	P1P2	-20	0.963907	0	0.281755
DLST	chr11	75348578	-	24	GAACACCCCTCGTCGGGCGGC	P1P2	-78	0.0312031	0.1125	0.0419852
DLST	chr11	75348625	-	24	GTTGTTGTCCGGCCCTATATC	P1P2	-31	0.527185	0	0.215383
DLST	chr11	75348740	-	22	GTACGGTCTGGCCGAGCCG	P1P2	84	-0.0409888	0.0181818	0.725973
DLST	chr11	75348755	-	24	GAGCCGGGGCCCCGACGGGTG	P1P2	99	0.00104371	0.0791667	0.0285792
DLST	chr11	75348768	-	24	GACGGGTGAGGAGTCTGTTGG	P1P2	112	-0.0378943	0.0791667	0.157139
DLST	chr11	75348777	-	24	GGAGTCTGTTGGCGGGCAGAG	P1P2	121	0.0918841	0.0416667	0.0863624
DLST	chr11	75348827	-	24	GccggccgggccgggcACCAA	P1P2	171	1.33195	0	0.421536
DMTF1	chr11	86781834	+	25	GTCCGGGCACTTTGGAAGAACC	P1P2	57	0.883449	0.068	0.118079
DMTF1	chr11	86781896	+	25	GCGGAGCGGCCCTGGCGGCGGT	P1P2	119	0.122704	0.188	0.056179
DMTF1	chr11	86781906	+	25	GCTCCACTGGGCGGAGCGGCCC	P1P2	129	0.587056	0.12	0.00355216
DMTF1	chr11	86781912	+	24	GACAGGCTCCACTGGGCGGAG	P1P2	135	0.717153	0.1	0.303285
DMTF1	chr11	86781917	+	26	GGGGCCGGACAGGCTCCACTGGG	P1P2	140	0.308346	0.0730769	0.167763
DMTF1	chr11	86781930	+	25	GCGGGCAGCAAGGGGGCCGGAC	P1P2	153	0.0237791	0.024	0.0196363
DMTF1	chr11	86781935	+	24	GCTAGCGGGCAGCAAGGGGGC	P1P2	158	0.610773	0.00416667	0.0958153
DMTF1	chr11	86781941	+	24	GCGGGAGCTAGCGGGCAGCAA	P1P2	164	1.21735	0	0.123485
DMTF1	chr11	86781951	+	24	GCGCCAGCCGGCGGGAGCTAG	P1P2	174	0.899203	0	0.0218503
DMTF1	chr11	86781893	-	23	GTAAGTGCGATGGAACCTTC	P1P2	116	0.573589	0.308696	0.401292
DNA2	chr11	70231453	+	22	GCACCGCCTCAGACTGACC	P1P2	186	0.218518	0.0454545	0.0127063
DNA2	chr11	70231509	+	24	GGGAGGGTGTGGGAACAAAGC	P1P2	130	0.247627	0.225	0.25893
DNA2	chr11	70231531	+	24	GCGGAGCTGTGAGCGGAGAGG	P1P2	108	0.798743	0.7375	0.27429
DNA2	chr11	70231572	+	23	GCTGATGGAGAAGAGTTTTT	P1P2	67	0.0223512	2.14783	0.357259
DNA2	chr11	70231617	+	22	GCGATCCCCGCGTCCAGGA	P1P2	22	0.514391	0.668182	0.0494213
DNA2	chr11	70231407	-	23	GAGGCAGGCCCCGACTCCGG	P1P2	232	0.636685	0.378261	0.155523
DNA2	chr11	70231415	-	24	GCCCCGACTCCGGAGGCTCGT	P1P2	224	0.770013	0.2625	0.209648
DNA2	chr11	70231437	-	24	GGGTGCCCAGGGAGCTGCACC	P1P2	202	0.611401	0.254167	0.110573
DNA2	chr11	70231468	-	24	GCCCCGGGCCCGGTCAGTCTG	P1P2	171	1.43124	0.116667	0.0408189
DNA2	chr11	70231625	-	24	GTTCGTTCAGCTGCTCCATCC	P1P2	14	0.588725	1.42083	0.0139011
DNM2	chr11	10828948	+	24	GTCCTGCAGTTTGTTGACCAG	P1P2	169	-0.0666502	0	0.518786
DNM2	chr11	10828973	+	23	GCTCTGGCCGATGGAGCTGA	P1P2	194	0.499497	0.0739131	0.248187
DNM2	chr11	10828982	+	26	GTCCAGGTGGCAGCTCTGGCCGA	P1P2	203	0.0616358	0.0923077	0.0118162
DNM2	chr11	10828998	+	24	GCGATCTGCGGCAGGTCCAGG	P1P2	219	1.33841	0.0333333	0.323531
DNM2	chr11	10828873	-	23	GCCAGGTCGTTGAGGGTCGG	P1P2	94	1.01151	0	0.168651
DNM2	chr11	10828876	-	21	GTCGTTGAGGGTCGGCGG	P1P2	97	0.378624	0	0.281463
DNM2	chr11	10828890	-	25	GTCGGCGGCGGGCGAGGAGCGC	P1P2	111	0.424938	0	0.00352376
DNM2	chr11	10828898	-	24	GGGCGAGGAGCGCAGGGCGCT	P1P2	119	0.080113	0	0.0221494
DNM2	chr11	10828922	-	24	GccgggggccgccggcgccAT	P1P2	143	0.650079	0	0.138033
DNM2	chr11	10828932	-	24	GccggcgccATGGGCAACCGC	P1P2	153	0.461787	0	0.369133
DPH1	chr11	1933372	+	22	GATCGCCGATCGGCCAGCG	P1	-85	-0.0142484	0	0.13648
DPH1	chr11	1933553	+	24	GGGGCCCCGCCCCGAGATGCG	P1	96	0.0321431	0.075	0.48524
DPH1	chr12	1933576	+	24	GGGTTGGTCCTGTCCCTAACT	P1	119	-0.0102728	0.25	0.0430161
DPH1	chr12	1933593	+	24	GCCGCCGCCGTTAAAGGGGGT	P1	136	0.256634	0.2	0.0720154
DPH1	chr12	1936771	+	24	GAATGGATATAAGGCCTGAGT	P2	-72	-0.00110074	0.579167	0.0477125
DPH1	chr12	1936804	+	24	GATTGGCCACGCGGCCCCGAG	P2	-39	-0.0176327	0.95	0.252417
DPH1	chr12	1936814	+	24	GGGGGGATCTGATTGGCCACG	P2	-29	0.0253486	0.85	0.627502
DPH1	chr12	1936822	+	23	GATCTCAGGGGGGATCTGAT	P2	-21	0.0197864	0.765217	0.0845703
DPH1	chr12	1936832	+	23	GGTTCTTCAGGATCTCAGGG	P2	-11	0.0192318	0.895652	0.653999
DPH1	chr12	1933380	-	24	GCGGGTATCCCCCGCCCCCGC	P1	-77	0.0481846	0	0.0314336
DPH1	chr12	1933485	-	21	GGCGGCGCTGGTCGTATC	P1	28	1.23204	0	0.00861858
DPH1	chr12	1933500	-	23	GTATCCGGGGCAGCGGAGCA	P1	43	1.14841	0	0.0304281
DPH1	chr12	1933566	-	24	GCCCTCCAGACCTCGCATCTC	P1	109	0.0262487	0.075	0.0101019
DPH1	chr12	1933609	-	24	GACAGGACCAACCCCCTTTAA	P1	152	0.619542	0.2625	0.273507
DPH1	chr12	1933697	-	24	GTCGCTGTCAGCCGGAGCCCA	P1	240	0.468634	0.2	0.0881138
DPH1	chr12	1936716	-	23	Gcttgagcgggggcaccggc	P2	-127	0.0498421	0.813044	0.193313
DPH1	chr12	1936727	-	23	Ggcaccggcaggccctgaaa	P2	-116	-0.015332	0.952174	0.193313
DPH1	chr12	1936751	-	24	GatccctattccatctcaATC	P2	-92	-0.0373725	0.8125	0.0315992
DPH1	chr12	1936821	-	24	GTCGGGCCCCTCGGGGCCGCG	P2	-22	0.0145379	0.895833	0.314387
DPH1	chr12	1936974	-	24	GTGAGCCTGTGATCATTGAGC	P2	131	-0.0264396	0.958333	0.119086
DSN1	chr12	35402032	+	24	GTTCCGGACTGGACGGGCGTC	P1P2	103	0.0167945	0.529167	0.0295412
DSN1	chr12	35402040	+	24	GTACGGAGGTTCCGGACTGGA	P1P2	95	0.0164524	0.595833	0.235118
DSN1	chr12	35402049	+	24	GTGTTTCAGGTACGGAGGTTC	P1P2	86	0.028845	0.558333	0.0296749
DSN1	chr12	35402141	+	24	GAGACCGCTTCACCCTGATCA	P1P2	-6	1.26678	0.141667	0.134258
DSN1	chr12	35402167	+	22	GCGGTGACCGTGACGTAGA	P1P2	-32	0.511495	0.0636364	0.0314947
DSN1	chr12	35401959	-	24	GGGGCTGCGGCGGGTCGAGCT	P1P2	176	0.265158	0.0583333	0.0257031
DSN1	chr12	35401967	-	24	GGCGGGTCGAGCTGGGCCGAC	P1P2	168	0.486286	0.025	0.119349
DSN1	chr12	35402002	-	23	GAGATTAGTGCGGCGGCGGG	P1P2	133	-0.0157383	0	0.0801458
DSN1	chr12	35402083	-	24	GTACCTGAAACACAAGGCCAC	P1P2	52	0.409586	0.470833	0.144524
DSN1	chr12	35402152	-	24	GCAGCCGATACTCCCTGATCA	P1P2	-17	1.22172	0.25	0.309211
DTL	chr14	212208875	+	24	GTAACAGGGCTTGACAGCGCG	P1P2	-272	1.66382	0.183333	0.793899
DTL	chr14	212208907	+	23	GGACAAACCGCGGGGTGACC	P1P2	-240	0.764665	0.1	0.0241272
DTL	chr14	212208928	+	24	GCGCAGGGGGTAGCAGAGGCG	P1P2	-219	0.571514	0.1125	0.188225
DTL	chr14	212208945	+	24	GAGCTCCTTGAGCGCCTGCGC	P1P2	-202	-0.00150157	0.208333	0.013426
DTL	chr14	212209040	+	24	GATTGGCTTCCGAGCGACGTC	P1P2	-107	0.181067	0.279167	0.310158
DTL	chr14	212208911	-	23	GCCCTGTTACGCATGCGCCC	P1P2	-236	0.182813	0.130435	0.352472
DTL	chr14	212208994	-	24	GGACTCCAGGTTCCCGCGGCT	P1P2	-153	0.177161	0.3	0.0223605
DTL	chr14	212209043	-	23	GGAAATGACTCTGAGGCGCC	P1P2	-104	0.0778781	0.33913	0.177126
DTL	chr14	212209090	-	22	GCGTGACGTCAGTTTGGCG	P1P2	-57	-0.110767	0.2	0.473619
DTL	chr14	212209182	-	23	GCTGCGATTTCTGCTGAACT	P1P2	35	0.0941237	0.586957	0.0739045
DYNC1H1	chr14	102430877	+	23	GGGAGCCGGCTCCGCCCTAA	P1P2	-39	1.0773	0	0.031209
DYNC1H1	chr14	102430941	+	24	GCAAGAGACAGAAACGGCCGC	P1P2	25	0.657655	0	0.244808
DYNC1H1	chr14	102431003	+	24	GTGTCGCGCTCGGGACCTTCC	P1P2	87	0.285738	0.1	0.0312537
DYNC1H1	chr14	102430947	-	23	GCGGACGGTCCGGCTTCCGG	P1P2	31	1.11291	0	0.476879
DYNC1H1	chr14	102430986	-	24	GCTGGCTGTCTCGCTGAGTCG	P1P2	70	0.484234	0.00833333	0.562421
DYNC1H1	chr14	102431011	-	23	GCCTTCTCATCGCTCCTGGA	P1P2	95	0.245758	0.1	0.212928
DYNC1H1	chr14	102431034	-	24	GTCCCGAGCGCGACACCATGT	P1P2	118	0.118645	0.1	0.242706
DYNC1H1	chr14	102431043	-	24	GCGACACCATGTCGGAGCCCG	P1P2	127	-0.0283743	0.1	0.218403
DYNC1H1	chr14	102431076	-	24	GCGAGGACGGCTCGGCCGGAT	P1P2	160	0.120762	0.0333333	0.0134291
DYNC1H1	chr14	102431139	-	23	GCAGAAGCACCTGCGCAAGC	P1P2	223	0.0182052	0	0.219968
E4F1	chr14	2273589	+	22	GCAACGCGCCGCAGGAAGA	P1P2	-48	-0.0334456	0	0.0539434
E4F1	chr14	2273664	+	24	GCTTCCCGCCCGGCTTCGGCC	P1P2	27	0.0430227	0	0.0660099
E4F1	chr14	2273551	-	24	GCCGTTCCCTCACGCTGGCCT	P1P2	-86	-0.0402519	0.0916667	0.199331
E4F1	chr14	2273577	-	22	GCCCGTTGTTATGACGACA	P1P2	-60	-0.077726	0	0.170575
E4F1	chr14	2273621	-	23	GCGGCGCGTTGCGACATGGA	P1P2	-16	1.23961	0	0.406057
E4F1	chr14	2273644	-	24	GCGCGATGGCAGTGCGGGTGA	P1P2	7	1.40098	0	0.0739565
E4F1	chr14	2273668	-	22	GCTCATACGGCAGAAGCCC	P1P2	31	0.177802	0	0.0738468
E4F1	chr14	2273788	-	23	GGAAGGTAACCGGGCCGACC	P1P2	151	0.221188	0	0.0610868
E4F1	chr14	2273802	-	24	GCCGACCCGGAGGGTGCGGCC	P1P2	165	0.166146	0.0458333	0.00981269
E4F1	chr14	2273822	-	23	GGGGTGCGGGCAGTTCATCC	P1P2	185	0.359415	0.0782609	0.00378509
ECT2	chr14	172468714	+	22	GGGCGGGGACGTCGACCGC	P1P2	132	0.477548	0.0772727	0.0170211
ECT2	chr14	172468730	+	24	GGAATTCGCGGTCACTAGGGG	P1P2	148	0.699669	0	0.258397
ECT2	chr14	172468735	+	24	GCTCCGGAATTCGCGGTCACT	P1P2	153	0.0269306	0	0.0240326
ECT2	chr14	172472232	+	28	GTCATTGGGCAAAAGTAAGTATTAG	P1P2	3650	-0.0214905	0	0.076612
ECT2	chr14	172472345	+	25	GCCAAGCTAGTCCTCCCAGTAG	P1P2	3763	0.00827156	0.804	0.147814
ECT2	chr14	172472408	+	25	GATCCAATAAGTAAGTTTTCCT	P1P2	3826	-0.00326345	1.164	0.0733659
ECT2	chr14	172472455	+	24	GATTGTTTTAAAGCAGGTAAC	P1P2	3873	0.0119532	0.295833	0.199694
ECT2	chr14	172472462	+	23	GAAATTGATTGTTTTAAAGC	P1P2	3880	0.0309809	0.226087	0.0748093
ECT2	chr14	172468520	-	22	GTTGACATCACGCGCCAAT	P1P2	-62	0.00861011	0.0454545	0.640321
ECT2	chr14	172468558	-	23	GAGCAGCTTAGTTTTTGAAT	P1P2	-24	0.0468551	0.134783	0.254038
ECT2	chr14	172468587	-	24	GCGGCCGCCGGCGAGGAATGG	P1P2	5	0.883827	0.3	0.129766
ECT2	chr14	172468606	-	24	GGCGGTATTTGTGAGAGGAGT	P1P2	24	0.472382	0.5875	0.216589
ECT2	chr14	172468618	-	24	GAGAGGAGTCGGCGTTTGAAG	P1P2	36	0.498873	1.1125	0.250146
ECT2	chr14	172468690	-	23	GAGAGGTGCAAGTGGGCGAG	P1P2	108	0.834792	1.12174	0.213462
ECT2	chr14	172468705	-	24	GGCGAGCGGCTCCAGAGCCAA	P1P2	123	1.28138	0.945833	0.495883
ECT2	chr14	172472323	-	27	GCTGATTTAGAAGAATACAAATCA	P1P2	3741	0.0527685	0.274074	0.0509204
ECT2	chr14	172472358	-	24	GTATTAACATCCACTACTGGG	P1P2	3776	-0.0607969	0.591667	0.314023
ECT2	chr14	172472413	-	28	GATTCTAAAGTTACTGAGATTTCCA	P1P2	3831	0.0250772	1.31429	0.0909372
ECT2	chr15	172472429	-	27	GATTTCCAAGGAAAACTTACTTAT	P1P2	3847	-0.0124839	1.25185	0.0692683
ECT2	chr15	172472450	-	23	GGATCTACTTCATATGTAGA	P1P2	3868	0.000151464	0.734783	0.374747
EIF4E	chr15	99850038	+	24	GTAGCGCACACTTTCTGGTGG	P1P2	230	0.360656	0	0.129178
EIF4E	chr15	99850044	+	23	GGCGTGTAGCGCACACTTTC	P1P2	224	0.376395	0	0.0161648
EIF4E	chr15	99850078	+	24	GGACAAGTGGGGACGTCCCGG	P1P2	190	0.340867	0.0708333	0.228296
EIF4E	chr15	99850259	+	23	GCGATCAGATCGATCTAAGA	P1P2	9	0.241955	0	0.43153
EIF4E	chr15	99851489	+	24	GAACATTAAAGCCTCTATTGA	P1P2	-1221	-0.031128	2.225	0.120763
EIF4E	chr15	99851563	+	24	GGAAATGTAGGATGCCAGTGT	P1P2	-1295	0.00237978	1.025	0.0478515
EIF4E	chr15	99851576	+	27	GTATCTTAGAGGGAAAGGAAATGT	P1P2	-1308	0.0255711	1.36296	0.0561099
EIF4E	chr15	99851585	+	27	GACAGCACAGTATCTTAGAGGGAA	P1P2	-1317	-0.0301699	1.5	0.190024
EIF4E	chr15	99851591	+	26	GAAATGACAGCACAGTATCTTAG	P1P2	-1323	-0.0138478	1.55	0.175438
EIF4E	chr15	99851687	+	23	GTCTTCTTCATTAGAACCTT	P1P2	-1419	0.0559527	1.05217	0.11634
EIF4E	chr15	99851728	+	24	GTCAACATTATTTAAAAGCAT	P1P2	-1460	-0.0574355	0.983333	0.345152
EIF4E	chr15	99850106	-	23	GGACGTCCCCACTTGTCCGC	P1P2	162	-0.0278916	0.108696	0.295589
EIF4E	chr15	99850128	-	24	GGAGGTCAGGTCCAACATGAA	P1P2	140	0.176218	0.258333	0.10022
EIF4E	chr15	99850160	-	23	GCAAGGGGTACAGTGCGCGC	P1P2	108	0.12749	0.591304	0.501004
EIF4E	chr15	99850208	-	23	GTCAGAAGGAAGACGGAGCG	P1P2	60	0.617072	0.0217391	0.141763
EIF4E	chr15	99850220	-	24	GACGGAGCGCGGGGACCCGTG	P1P2	48	0.279837	0	0.11728
EIF4E	chr15	99850247	-	24	GGGGCCAAAGGCAATACTCAC	P1P2	21	2.00653	0.0916667	0.361215
EIF4E	chr15	99851572	-	27	GCAATCAGAAATTTGTCCCCACAC	P1P2	-1304	0.014419	0.637037	0.0953162
EIF4E	chr15	99851644	-	24	GACCGTGTTTTTTGCACAGTT	P1P2	-1376	-0.0384681	1.19583	0.0249221
EIF4E	chr15	99851693	-	25	GAAGAAATCTAGTAGACTCCTA	P1P2	-1425	-0.0196342	1.604	0.252839
EIF4G2	chr15	10821977	+	25	GCCACAAGTGACAACTTCATGC	P2	6915	-0.0354365	0.42	0.301466
EIF4G2	chr16	10822006	+	24	GATCAGTTTACTCAAACAGGA	P2	6886	0.0280859	0.6375	0.220673
EIF4G2	chr16	10829346	+	25	GGAGGAGGCGAAAGGGTGGACA	P2	-454	-0.0467544	0.924	0.110434
EIF4G2	chr16	10829371	+	25	GCGTCTTTCCACGAGCTCTCCA	P2	-479	-0.0117546	0.42	0.448579
EIF4G2	chr16	10829448	+	24	GAGGTTCCTGCTGCCATGTTG	P2	-556	-0.00957505	0.208333	0.135056
EIF4G2	chr16	10829568	+	24	GCTCCTCCCCGTCGAGCGACC	P2	-676	-0.00589475	0.120833	0.0439718
EIF4G2	chr16	10829614	+	24	GGAGAACAAAGAGCTGGGCGC	P2	-722	-0.015241	0	0.221049
EIF4G2	chr16	10829636	+	24	GCAGGAGGCCGCCTTCCTGCT	P2	-744	0.00784704	0.0166667	0.0184968
EIF4G2	chr16	10830256	+	22	GTGGCAGCTGCTGAGTTCT	P1	207	0.755364	0.309091	0.0437949
EIF4G2	chr16	10830387	+	24	GACTCCTCTGAGCTGAGTTTG	P1	76	0.143522	0.1	0.087635
EIF4G2	chr16	10830424	+	24	GAGGTGGCAGCGGGTACCGAG	P1	39	1.0454	0	0.431153
EIF4G2	chr17	10830435	+	24	GGAGCTCTATGGAGGTGGCAG	P1	28	0.486042	0	0.369286
EIF4G2	chr17	10830441	+	23	GAGTCGGAGCTCTATGGAGG	P1	22	1.10756	0	0.252849
EIF4G2	chr17	10830457	+	24	GCCTTAGCGCCAGCAGTGAGT	P1	6	0.847033	0	0.428782
EIF4G2	chr17	10821846	-	23	GCTAAATAGGATTTCACCAA	P2	7046	-0.0236067	1.86522	0.185983
EIF4G2	chr17	10829403	-	24	GCTCGTGGAAAGACGCGCGAG	P2	-511	-0.00582541	0.375	0.0221364
EIF4G2	chr17	10829411	-	25	GAAAGACGCGCGAGAGGGGGCC	P2	-519	-0.0162165	0.376	0.0614628
EIF4G2	chr17	10829419	-	24	GCGAGAGGGGGCCGGGTGTAC	P2	-527	0.0898289	0.425	0.00340583
EIF4G2	chr17	10829434	-	24	GTGTACAGGACTAGCACTTGC	P2	-542	0.0754286	0.425	0.159107
EIF4G2	chr17	10829447	-	24	GCACTTGCAGGCGGAAGACCA	P2	-555	0.115864	0.375	0.172125
EIF4G2	chr17	10829458	-	25	GCGGAAGACCAGGGCCACAACA	P2	-566	0.10131	0.324	0.489186
EIF4G2	chr17	10829584	-	24	GCGAGGCCCGGGTCGCTCGAC	P2	-692	0.0193626	0.275	0.0414034
EIF4G2	chr17	10829617	-	25	GCTGAGGCCACCCCCGCCAGCC	P2	-725	-0.0206942	0	0.0699312
EIF4G2	chr17	10830228	-	24	GCCATTTTAGAGCGCTCCACT	P1	235	0.0298274	0	0.471821
EIF4G2	chr17	10830315	-	21	GATCCGGTCGTCGgggat	P1	148	0.224344	0.152381	0.145193
EIF4G2	chr17	10830382	-	24	GgaagggggaggaaggAGTCG	P1	81	0.373478	0.1	0.345225
EIF4G2	chr17	10830510	-	24	GAAGCCGAACTTATCACTCTT	P1	-47	0.355503	0.1	0.0665406
EIF5A	chr17	7211552	+	24	GCCTCCCGTGGGGGGCACTTC	P1P2	569	0.0056975	0	0.0212317
EIF5A	chr17	7211647	+	24	GGGCTTCCGGTGGCCGGGACC	P1P2	664	-0.185998	0	0.00158062
EIF5A	chr17	7211668	+	23	GCCGACCATGTGGCCGTTCC	P1P2	685	-0.0274704	0	0.0117369
EIF5A	chr17	7210839	-	25	GGAGGGAGGGTGGAGATGGGTA	P1P2	-144	0.347936	0.072	0.166619
EIF5A	chr18	7210864	-	24	GTGTGCGCTTGCGCAGTGCGG	P1P2	-119	-0.0878961	0.129167	0.131454
EIF5A	chr18	7210871	-	25	GCTTGCGCAGTGCGGGGGTGGA	P1P2	-112	0.271452	0.156	0.0570899
EIF5A	chr18	7210900	-	22	GATAGATAGCACGCTTGCG	P1P2	-83	0.721951	0.0590909	0.857551
EIF5A	chr18	7210910	-	24	GCACGCTTGCGCGGCTGTCAT	P1P2	-73	0.586324	0.0125	0.0169204
EIF5A	chr18	7210919	-	23	GCGGCTGTCATAGGGCTGCT	P1P2	-64	0.900597	0	0.248726
EIF5A	chr18	7210930	-	28	GTCATAGGGCTGCTTGGTTGGTCAG	P1P2	-53	0.267932	0	0.051468
EIF5A	chr18	7210932	-	24	GGGCTGCTTGGTTGGTCAGTG	P1P2	-51	1.37745	0	0.0933238
EIF5A	chr18	7210938	-	25	GCTTGGTTGGTCAGTGGGGAGT	P1P2	-45	0.570336	0	0.0351437
EIF5A	chr18	7210971	-	26	GTACTAAGACCCGTGTgcagcag	P1P2	-12	0.0507099	0	0.412759
EIF5A	chr18	7211086	-	23	GCGCGAGGTGAGAGCGGGCA	P1P2	103	-0.0621831	0	0.378794
EIF5A	chr18	7211107	-	24	GGGCGCGTGTGCGCGGTACCT	P1P2	124	-0.0292355	0	0.0464769
EIF5A	chr18	7211140	-	22	GAGAAGATGGAACTGCGCG	P1P2	157	0.0750977	0	0.645318
EIF5A	chr18	7211296	-	23	GTTGGAGCGACGCAGGGCGG	P1P2	313	0.62373	0	0.300538
EIF5A	chr18	7211323	-	24	GCGAGCCGCGAGGCAGCCACG	P1P2	340	0.152416	0	0.825302
EIF5A	chr18	7211351	-	24	GGCCGCCAGGCGGCCACGCCG	P1P2	368	-0.364562	0	0.183036
EIF5A	chr18	7211383	-	23	GGGGCCAGATCGGCCCACCG	P1P2	400	0.0897967	0	0.462647
EIF5A	chr18	7211396	-	24	GCCCACCGGGGCAAGGGTACC	P1P2	413	-0.0164278	0	0.000796801
EIF5A	chr18	7211460	-	24	GGAGGGGGCTATTCGGTGAGA	P1P2	477	0.0315847	0	0.141159
EIF5A	chr18	7211492	-	24	GGGGGGTTGGCGGACGGCCGG	P1P2	509	-0.0218017	0	0.013422
EIF5A	chr18	7211537	-	24	GGCCTGGCGCAGTCTCTGAGG	P1P2	554	0.0999593	0	0.0730091
EIF5A	chr17	7211570	-	23	GGCACCGGAAGTGCCCCCCA	P1P2	587	0.160022	0	0.25594
EIF5A	chr17	7211731	-	23	GCGCGGGGAGCTAGTCCTCG	P1P2	748	0.01928	0	0.24048
EIF5B	chr17	99953770	+	24	GGCTCATCGAGAGCTGCGCTT	P1P2	-124	0.0632606	0	0.668029
EIF5B	chr17	99954069	+	24	GCCACGGCGGCCGCCGCCGTA	P1P2	175	-0.0194512	0.1	0.0736367
EIF5B	chr17	99954083	+	24	GCACACTCCACTGAGCCACGG	P1P2	189	0.355335	0.0541667	0.495435
EIF5B	chr17	99953825	-	23	GTCCTCACGCCGAGGCGGCT	P1P2	-69	0.770975	0.0173913	0.0633125
EIF5B	chr17	99953920	-	24	GTGCGAGCGGCGGCAGCACGA	P1P2	26	0.701825	0.0541667	0.101317
EIF5B	chr17	99953953	-	23	GAGCGGAGACCAAAGTCAGC	P1P2	59	0.130678	0.765217	0.437641
EIF5B	chr17	99953986	-	24	GGTCTGTGAGAGACCGAATAG	P1P2	92	0.326456	1.59583	0.177682
EIF5B	chr17	99954022	-	24	GAGCGCCATTGACAAGCAATG	P1P2	128	-0.0121876	0.629167	0.514401
EIF5B	chr1	99954079	-	21	GGGGTTGGGTCCGTACGG	P1P2	185	1.16724	0.1	0.354125
EIF5B	chr1	99954099	-	24	GCGGCGGCCGCCGTGGCTCAG	P1P2	205	1.06179	0.0875	0.0546374
ENO1	chr1	8938494	+	24	GCACGTGCAAGCCGCCTCCCT	P1P2	242	0.147931	0	0.01269
ENO1	chr1	8938520	+	24	GCAGGCCCAGCGTGGCGGGGT	P1P2	216	0.183482	0	0.00643203
ENO1	chr1	8938576	+	24	GCAGGGCTTTTCTGGGCTTGT	P1P2	160	-0.0239819	0.0291667	0.0129227
ENO1	chr1	8938585	+	24	GCAGGCGGCGCAGGGCTTTTC	P1P2	151	0.0877485	0.0666667	0.0016735
ENO1	chr1	8938637	+	23	GGCGACGAGACCCAGTGGCT	P1P2	99	0.0937075	1.07826	0.0588609
ENO1	chr1	8938733	+	23	GCGGCGCGGACAGTATCTGT	P1P2	3	1.49015	0	0.108843
ENO1	chr1	8938567	-	23	GGCGCGCCGCCTCCCTCGGA	P1P2	169	0.4369	0	0.198379
ENO1	chr1	8938668	-	21	GGTCTCGTCGCCTAGGAG	P1P2	68	0.624923	1.14286	0.188158
ENO1	chr2	8938729	-	24	GCCGGCGAGATCTCCGTGCTC	P1P2	7	0.884927	0.0958333	0.0203144
ENO1	chr2	8938782	-	23	GCCGACTTCCTGCCTAGCTA	P1P2	-46	0.000116554	0.117391	0.277703
EPC2	chr2	149402626	+	23	GCGGTAGATAGGCAGCGGCT	P1P2	285	0.666601	2.07826	0.0554548
EPC2	chr2	149402661	+	24	GGAGACGCAGTCGTTGAGATC	P1P2	320	0.514295	4.65833	0.0741835
EPC2	chr2	149402683	+	21	GGGGCACGGCCCGGTTGA	P1P2	342	0.530265	1.6381	0.00879509
EPC2	chr2	149402778	+	24	GCCCGACTGACAAAGGGGAGG	P1P2	437	0.812952	0	0.0735172
EPC2	chr2	149402784	+	23	GCGAGGCCCGACTGACAAAG	P1P2	443	0.362311	0	0.449066
EPC2	chr2	149402806	+	24	GAGCGTAAAGCGCTCTGTGAA	P1P2	465	0.518441	0	0.106303
EPC2	chr2	149402575	-	24	GccgcccgggcTGTTCCTGTA	P1P2	234	1.21988	0	0.0415219
EPC2	chr2	149402613	-	24	GTAAACTCTCCTTCCGAGCGC	P1P2	272	-0.0429465	0	0.176453
EPC2	chr3	149402744	-	24	GAGAAGGAGGAGGAATCGGTA	P1P2	403	0.967166	0.0583333	0.221091
EPC2	chr3	149402837	-	23	GAGCGCTTTACGCTCGCTGG	P1P2	496	0.274781	0	0.0965558
EPG5	chr3	43546984	+	24	GATCCCACCACCCGTTGACAC	P1P2	239	0.423891	0.370833	0.26168
EPG5	chr3	43547136	+	23	GCCGGACTAAAACAAAGGTG	P1P2	87	0.77269	1.46522	0.692175
EPG5	chr3	43547175	+	24	GAGGCGGTGAAGCCCCAGCGC	P1P2	48	0.47496	0.383333	0.105161
EPG5	chr3	43547192	+	23	GGAAGGGTCTATGGCCGAGG	P1P2	31	1.07506	0.13913	0.453
EPG5	chr3	43547246	+	23	GGCAGGTTGCTTGAAGCGCA	P1P2	-23	0.971716	0	0.395732
EPG5	chr3	43547263	+	24	GTCCGGAGGCCAGAACCGGGC	P1P2	-40	0.953224	0.0666667	0.088024
EPG5	chr3	43546996	-	24	GAGGAGAAGGGCCGGTGTCAA	P1P2	227	0.78575	0.6875	0.0245822
EPG5	chr3	43547023	-	24	GTGGGATCAAATATTGGAAGG	P1P2	200	0.905798	0.3	0.0797966
EPG5	chr4	43547070	-	24	GGGAACGGGAGTAGAATTGGC	P1P2	153	0.709747	0.129167	0.18569
EPG5	chr4	43547184	-	24	GCCTTGGCCTTGGCCCGGCGC	P1P2	39	0.520231	0.791667	0.0339908
ESPL1	chr4	53662280	+	24	GCCCAGCCCTTCAGCGGCCCG	P1P2	175	0.767024	0.1625	0.26621
ESPL1	chr4	53662104	-	23	GGTTACATTTTGGATCCTCG	P1P2	-1	-0.00684088	0.265217	0.629778
ESPL1	chr4	53662161	-	24	GAAAGAGGGCGAGCTCTGGGG	P1P2	56	0.167859	1.02083	0.476909
ESPL1	chr4	53662166	-	23	GGGCGAGCTCTGGGGCGGTA	P1P2	61	0.486536	0.934782	0.0463637
ESPL1	chr4	53662241	-	24	GCGCTGACGCGAGGAGAGGCG	P1P2	136	0.642515	0.00833333	0.30119
ESPL1	chr4	53662268	-	24	GCTCCTGGAGGGAGTGTCGGG	P1P2	163	1.14933	0	0.185934
ESPL1	chr4	53662275	-	24	GAGGGAGTGTCGGGAGGCCTT	P1P2	170	-0.0472768	0.0166667	0.0314114
ESPL1	chr4	53662296	-	24	GGGACTGCCCCGGGCCGCTGA	P1P2	191	1.08364	0.1125	0.02374
ESPL1	chr6	53662345	-	24	GCGGCGAGTGGTGTGGTAGTG	P1P2	240	0.63083	0.225	0.116487
ESPL1	chr6	53662350	-	24	GAGTGGTGTGGTAGTGCGGTC	P1P2	245	0.303563	0.279167	0.0511327
ESRRA	chr6	64073150	+	24	GGGCCGAGCGGCCCGGAGTGC	P1P2	94	-0.128363	0	0.030101
ESRRA	chr6	64073173	+	24	GCAGCGCGGTCGGGCAGGCAT	P1P2	117	1.05983	0	0.10322
ESRRA	chr6	64073183	+	23	GGGGCTCCGGCAGCGCGGTC	P1P2	127	0.63319	0	0.0191183
ESRRA	chr6	64073708	+	27	GCTACGCCTCCCCCTCCCCGCCCG	P1P2	652	-0.0112571	0.0333333	0.167716
ESRRA	chr6	64073884	+	26	GCTGCCCTCCTGCCCCAGCATGC	P1P2	828	0.159389	0.219231	0.210184
ESRRA	chr6	64073909	+	24	GAGCTTTTCACACCTGACACG	P1P2	853	-0.118637	0.225	0.831494
ESRRA	chr6	64073957	+	25	GTCTCCCCACATCCACACGCAC	P1P2	901	0.261373	0.8	0.133577
ESRRA	chr6	64073077	-	24	GCCGGCGGCGCCGCCGAGTGA	P1P2	21	0.872067	0	0.0809067
ESRRA	chr6	64073084	-	24	GCGCCGCCGAGTGAGGGGAcg	P1P2	28	0.781468	0	0.0417631
ESRRA	chr6	64073094	-	24	GTGAGGGGAcgcggcgcggtg	P1P2	38	0.955077	0	0.185298
ESRRA	chr6	64073239	-	24	Gcggaggggagcgctgccgcg	P1P2	183	-0.0853764	0	0.193313
ESRRA	chr6	64073281	-	24	Ggggccatgtgcgagcgcggc	P1P2	225	-0.00179394	0	0.193313
ESRRA	chr6	64073289	-	24	Gtgcgagcgcggcagggaggc	P1P2	233	0.985095	0	0.193313
ESRRA	chr6	64073321	-	24	GctgcaggcgggGTCCGACTC	P1P2	265	0.721549	0	0.0231275
ESRRA	chr6	64073717	-	22	GGTAGAGGTCTCCCGCGGG	P1P2	661	-0.320791	0.177273	0.0481859
ESRRA	chr6	64073743	-	26	GGAGGGGGAGGCGTAGCAACTTT	P1P2	687	0.324881	0.0115385	0.0667355
ESRRA	chr6	64073784	-	26	GTGCGCAGGTTGGGGGCGGGACG	P1P2	728	0.157867	0.188462	0.0506091
ESRRA	chr7	64073792	-	26	GTTGGGGGCGGGACGCGGCGCCC	P1P2	736	0.0155274	0.2	0.00804148
ESRRA	chr7	64073938	-	24	GTCAGGTGTGAAAAGCTCTGG	P1P2	882	0.0287329	0.229167	0.238597
ESRRA	chr7	64073975	-	26	GTCCGTGCCTGTGCGTGTGGATG	P1P2	919	0.138426	0.784615	0.00321359
ETS2	chr7	40177315	+	21	GGTGCTGGTGGCACCGAA	P1P2	-548	0.190411	0.490476	0.698096
ETS2	chr7	40177342	+	24	GCCTTTGGAATTCCGCAGCGA	P1P2	-521	0.157641	0.4	0.394175
ETS2	chr7	40177767	+	23	Ggagggacggccgagtggag	P1P2	-96	0.931653	0.134783	0.193313
ETS2	chr7	40177812	+	24	GGCGCGCTCTTCAGGAGCggg	P1P2	-51	0.187684	0.195833	0.407383
ETS2	chr7	40177834	+	24	GTAACCGGGCCGTCCCCCACG	P1P2	-29	0.995904	0.125	0.490486
ETS2	chr7	40177863	+	24	GACACCGCACTCGTCAGTCTC	P1P2	0	0.559727	0.0291667	0.0355984
ETS2	chr7	40177910	+	23	GAGGCCGGACGCTGGCCGGG	P1P2	47	0.622441	0	0.302906
ETS2	chr9	40177932	+	24	GGCGCCGGCCAGAGACGATCA	P1P2	69	0.616963	0	0.133741
ETS2	chr9	40178009	+	23	GGCAGGGCCGGCGCTTGGTC	P1P2	146	0.548641	0	0.0181289
ETS2	chr9	40177273	-	24	GCCCATTCAGAGGTTCAAGAA	P1P2	-590	-0.0267417	0.05	0.0531678
ETS2	chr9	40177291	-	24	GAATGGGGTCGGCTCAATTTC	P1P2	-572	0.171395	0.154167	0.0566883
ETS2	chr9	40177373	-	24	GCGGAATTCCAAAGGCAGGTT	P1P2	-490	0.101205	0.266667	0.0420248
ETS2	chr9	40177398	-	24	GTTAGGGCCTTGGCCCCAGAG	P1P2	-465	0.992828	0.0333333	0.562638
ETS2	chr9	40177416	-	24	GAGAGGACGCCGAGCGCTCCA	P1P2	-447	0.416361	0	0.475434
ETS2	chr9	40177439	-	24	GAAAGTCTCCGCCCGGCTCCC	P1P2	-424	1.01127	0	0.0231596
ETS2	chr9	40177461	-	24	GGGCGCACACTCGCGCGCACG	P1P2	-402	0.139367	0	0.0355247
ETS2	chr9	40177490	-	23	GGCCCTGCTCCCGGGGCCTC	P1P2	-373	0.0814266	0	0.00291825
ETS2	chr9	40177841	-	24	GCTCCTGAAGAGCGCGCCGCG	P1P2	-22	0.840308	0.195833	0.180025
ETS2	chr9	40177951	-	24	GCCTCCCTGATCGTCTCTGGC	P1P2	88	0.244262	0	0.400578
ETS2	chr9	40178024	-	24	GCCACCGTCCCGACCAAGCGC	P1P2	161	0.227571	0	0.369634
FANCB	chr9	14890955	+	24	GTCATTCCTTGCAATGATAAT	P1P2	195	0.00991858	0.1	0.139528
FANCB	chr9	14890983	+	23	GAAGCGGGCATCCCGAGACC	P1P2	167	0.536429	0.252174	0.0203335
FANCB	chr9	14891010	+	23	GTCCCCGCATTGCGGGAGAG	P1P2	140	0.0799176	1.1913	0.0526042
FANCB	chr22	14891052	+	23	GGACTTCGCAGAGGGGGCGA	P1P2	98	0.684287	1.36087	0.118115
FANCB	chr22	14891097	+	24	GCCGCTGCGTTGAGGTAGGAT	P1P2	53	0.650486	0.0458333	0.0781232
FANCB	chr22	14891134	+	21	GGATACCGTATCGACGTG	P1P2	16	0.618209	0	0.247317
FANCB	chr22	14891197	+	24	GCGTTCGACGCAGCCTCCGCC	P1P2	-47	0.230927	0.0291667	0.567582
FANCB	chr22	14890994	-	24	GGAATGACAGACCCAGGTCTC	P1P2	156	0.38946	0.154167	0.0285208
FANCB	chr22	14891225	-	22	GAGGCTGCGTCGAACGCAG	P1P2	-75	0.411038	0.05	0.49559
FANCB	chr22	14891231	-	22	GCGTCGAACGCAGAGGAGG	P1P2	-81	1.66523	0.0772727	0.121407
FANCG	chr22	35080019	+	24	GCAGTCGGCCCTCGGTGGAAG	P1P2	-108	0.110161	0.0583333	0.105643
FANCG	chr22	35079741	-	24	GCTCTCAACCTCGCCTCTGGT	P1P2	170	1.05406	0.1	0.158222
FANCG	chr22	35079768	-	24	GGTCTGCGAAGCTCTGGGCTG	P1P2	143	0.426869	0.154167	0.148449
FANCG	chr19	35079860	-	24	GCTTAGGCGGGCTAGAAGCCG	P1P2	51	0.246687	0.05	0.247266
FANCG	chr19	35079874	-	24	GAAGCCGGGGTCGTGTCTGAC	P1P2	37	0.409706	0.120833	0.00479269
FANCG	chr19	35079899	-	24	GCAGTCGCACGGCCGGCGGTG	P1P2	12	0.836202	0.366667	0.0437685
FANCG	chr19	35079920	-	23	GGCCCGCTCGGCTCTCGCGG	P1P2	-9	1.01946	0.23913	0.406582
FANCG	chr19	35079939	-	23	GAGGCCACAGCCTCGAGAAA	P1P2	-28	0.797787	0.0782609	0.207633
FANCG	chr19	35079959	-	23	GGGTGGGCGGGAGCGAGTTT	P1P2	-48	0.926475	0	0.105406
FANCG	chr19	35080056	-	24	GGCCGACTGCGAGGTGCATGC	P1P2	-145	0.0922262	0.1	0.161841
FASN	chr19	80056097	+	24	GCCTAGAGGGAGCCAGAGAGA	P1P2	2	0.761007	0	0.275032
FASN	chr19	80056120	+	22	GTTTAAATAGCGTCGGCGC	P1P2	-21	0.270453	0	0.243685
FASN	chr19	80056126	+	23	GGCCGCGGTTTAAATAGCGT	P1P2	-27	0.863848	0	0.578624
FASN	chr2	80056153	+	23	GCCCATGTGGCGTGGCCGCC	P1P2	-54	0.286467	0	0.0691096
FASN	chr2	80056161	+	22	GCTGTCAGCCCATGTGGCG	P1P2	-62	0.420883	0	0.293425
FASN	chr2	80055934	-	23	GATGAGGAGCCGGGCCACCC	P1P2	165	-0.118113	0	0.0596999
FASN	chr2	80056004	-	24	GccggcTGCTCGTACCTggtg	P1P2	95	0.499995	0	0.212612
FASN	chr2	80056010	-	23	GCTCGTACCTggtgagggcg	P1P2	89	0.829249	0	0.606234
FASN	chr2	80056049	-	24	Gcggagagcgaggctggagcg	P1P2	50	1.13195	0	0.193313
FASN	chr2	80056072	-	24	Gcggagcgggaggctgaagcg	P1P2	27	1.0042	0	0.193313
FBXO5	chr2	153303865	+	23	GCGCGGCCATGCCACACGCC	P1P2	301	-0.0518853	0	0.166691
FBXO5	chr2	153303882	+	24	GTCCCTCGGAGCCTGGACGCG	P1P2	284	-0.0372314	0	0.274388
FBXO5	chr2	153303931	+	24	GCCAGGAGGGGTGCACGGGGA	P1P2	235	0.227037	0	0.096667
FBXO5	chr5	153303964	+	23	GTGAGGGGAGCGGTCGCGAG	P1P2	202	0.121454	0	0.107629
FBXO5	chr5	153304061	+	23	GCCCCTGCAGCTGCGCCCTA	P1P2	105	0.780807	0.0130435	0.151619
FBXO5	chr5	153303924	-	24	GGGACGTCGGGTCAGGGTCTC	P1P2	242	0.0458139	0	0.00364142
FBXO5	chr5	153303999	-	24	GCTCCCCTCACTCACTATCCG	P1P2	167	0.488928	0	0.350885
FBXO5	chr5	153304080	-	24	GTGGCCGTAGGGCGCAGCTGC	P1P2	86	0.0395097	0	0.00826294
FBXO5	chr5	153304107	-	24	GCCGGCTCATGCCAGCCGACG	P1P2	59	-0.0324579	0.154167	0.0350543
FBXO5	chr5	153304123	-	23	GACGTGGAGTCTGCCTCAGG	P1P2	43	1.29929	0.147826	0.052656
FDPS	chr5	155278669	+	22	GCTCCGCGATCGGCTCTGT	P1P2	-76	1.62187	0.127273	0.0423243
FDPS	chr5	155278678	+	22	GCAGAATCCGCTCCGCGAT	P1P2	-67	0.220234	0.177273	0.23282
FDPS	chr5	155278711	+	23	GCTCGGTCCCGCTTGTTGGC	P1P2	-34	0.480996	1.29565	0.460897
FDPS	chr5	155278794	+	26	GTTACAGAAGTAAGGCCCGGTCT	P1P2	49	0.109016	0.730769	0.0714466
FDPS	chr5	155278800	+	25	GTATCGTTACAGAAGTAAGGCC	P1P2	55	0.126761	0.688	0.549303
FDPS	chr5	155278726	-	22	GGAGTACCCGCCAACAAGC	P1P2	-19	0.776265	0.954545	0.257421
FDPS	chr5	155278749	-	24	GACCGAGCAGGAATCCGTATC	P1P2	4	0.516197	1.59167	0.0119718
FDPS	chr5	155278756	-	25	GCAGGAATCCGTATCTGGGAAC	P1P2	11	0.556187	1.472	0.0807141
FDPS	chr5	155278793	-	26	GTGTGCTGGGCCTTGGAGGAAGG	P1P2	48	0.260841	1.32308	0.0911744
FDPS	chr5	155278837	-	23	GTAACGATACTGTGAGGCAT	P1P2	92	0.601865	0.556522	0.833591
FH	chr5	241682766	+	23	GTCCGGGCCGCGCCAGACTC	P1P2	235	0.811271	0	0.00830939
FH	chr5	241682783	+	22	GAGAGATTCCCCGGGCGTC	P1P2	218	0.187008	0	0.0162104
FH	chr5	241682933	+	23	GCTTCGGCTCCCGGCTTGGG	P1P2	68	0.735641	0	0.198678
FH	chr5	241682973	+	21	GCTCGCGTCCCCTCGTGC	P1P2	28	0.979572	0	0.197214
FH	chr5	241683063	+	22	GACAACCGGCGTGGAGGCG	P1P2	-62	-0.0373714	0.122727	0.0830249
FH	chr5	241683076	+	24	GGCGGAACGGTTTCTGACAAC	P1P2	-75	-0.00766345	0.308333	0.128771
FH	chr5	241682861	-	24	GGAGGGCTGAAGGTCACTGCG	P1P2	140	0.812604	0	0.446357
FH	chr5	241682907	-	24	GCTCACCATTCGAGCCGCGTT	P1P2	94	0.0170236	0	0.0380853
FH	chr5	241683056	-	23	GCTTGGGTAGAATTTCTGGG	P1P2	-55	1.20782	0	0.986631
FH	chr5	241683105	-	24	GTCAGAAACCGTTCCGCCCAC	P1P2	-104	0.0607086	0.345833	0.519037
FIP1L1	chr5	54243977	+	24	GCCCCGAGCGCAACTTAAACG	P1P2	123	-0.00481075	0.0333333	0.840367
FIP1L1	chr5	54244003	+	24	GCTCGACCTCGCCGGCCGACA	P1P2	149	0.525444	0	0.0295846
FIP1L1	chr1	54244154	+	24	GGCGCGAGAGGCCAGGGACGC	P1P2	300	0.0759972	0.183333	0.0553149
FIP1L1	chr1	54244162	+	24	GAAGCGGCGGCGCGAGAGGCC	P1P2	308	0.00602742	0.0666667	0.0107693
FIP1L1	chr1	54244247	+	24	GCGGGAGACCGCCGCGGGGAC	P1P2	393	0.0411305	0	0.0012898
FIP1L1	chr1	54244254	+	24	GGGCCAGGCGGGAGACCGCCG	P1P2	400	0.004974	0	0.222622
FIP1L1	chr1	54244276	+	24	GGTGGATGCGCATGGTGGGCG	P1P2	422	0.0935684	0	0.0468094
FIP1L1	chr1	54244090	-	24	GGAGGAAGAGTGGCTCTATGG	P1P2	236	1.20757	0.15	0.224762
FIP1L1	chr1	54244223	-	24	GAGTCCTGTCCGGCCTGACTT	P1P2	369	1.08296	0	0.297221
FIP1L1	chr1	54244262	-	24	GCGTGCCCCCAGTCCCCGCGG	P1P2	408	0.709467	0	0.344062
FLAD1	chr1	154955808	-	23	GCAAGGCGGGACTTTAAGTA	P1P2	-43	0.162509	0.0521739	0.482651
FLAD1	chr1	154955842	-	24	GGGACATGAGGAAAGGAACAA	P1P2	-9	1.47779	0.154167	0.861612
FLAD1	chr2	154955852	-	25	GGAAAGGAACAAGGGAAAGAGC	P1P2	1	0.958251	0.116	0.294213
FLAD1	chr2	154955858	-	25	GAACAAGGGAAAGAGCCGGTGA	P1P2	7	0.530293	0.08	0.0492792
FLAD1	chr2	154955912	-	24	GCTCAGTAATCTGAAGCTTGG	P1P2	61	0.0468594	0.975	0.0649702
FLAD1	chr2	154955982	-	22	GAGACGGGATTTTGGTCCG	P1P2	131	-0.0714248	3.3	0.116226
FLAD1	chr2	154956007	-	24	GGAGAGCGAATGCATTGAAAA	P1P2	156	0.114671	0.816667	0.225124
FLAD1	chr2	154956041	-	24	GGATAAGGTAGACATTTAAAG	P1P2	190	0.280852	0.158333	0.851058
FLAD1	chr2	154956046	-	23	GGTAGACATTTAAAGGGGTA	P1P2	195	0.56396	0.134783	0.200551
FLAD1	chr2	154956109	-	24	GCAAACGGAAGACACTTAAAG	P1P2	258	0.193967	1.04167	0.329046
FLII	chr2	18161988	+	24	GCGGCGCCATGGAGGCCACCG	P1P2	16	0.142604	0	0.239716
FLII	chr2	18162069	+	24	Ggccggcgctggcccagcccg	P1P2	-65	0.108952	0	0.193313
FLII	chr2	18162092	+	24	GCGCGGGCGGGTTAAAggggc	P1P2	-88	-0.10177	0	0.0804982
FLII	chr2	18162238	+	24	GGGACTTAAGCCTGGAGATCG	P1P2	-234	0.155319	0.645833	0.165639
FLII	chr2	18161982	-	24	GAGGTCCACGCCACGCACGAA	P1P2	22	0.729788	0	0.517196
FLII	chr2	18161996	-	24	GCACGAACGGCAGCACCCCGG	P1P2	8	1.09033	0	0.081066
FLII	chr2	18162005	-	24	GCAGCACCCCGGTGGCCTCCA	P1P2	-1	1.17988	0	0.0512965
FLII	chr2	18162159	-	24	GTGTAGGCTTTAGGCCTCTTA	P1P2	-155	0.294612	0.00833333	0.0807084
FLII	chr2	18162273	-	24	GGCTTAAGTCCCAGCGCCCCA	P1P2	-269	0.480373	0.333333	0.923681
GADD45A	chr2	68150856	+	23	GACAAAGGGCCCCGCTCTCC	P1P2	-34	0.194841	0.2	0.00079037
GADD45A	chr2	68150916	+	22	GGGCCGCACGACACTAATT	P1P2	26	0.30005	0.0590909	0.119941
GADD45A	chr2	68150828	-	24	GCTGCATGCAAATGAGGCGGA	P1P2	-62	0.14679	0.25	0.0809978
GADD45A	chr2	68150860	-	23	GAGGGTTGGCAGGATAACCC	P1P2	-30	1.07616	0.2	0.151629
GADD45A	chr2	68150867	-	23	GGCAGGATAACCCCGGAGAG	P1P2	-23	0.711127	0.2	0.12065
GADD45A	chr2	68150887	-	24	GCGGGGCCCTTTGTCCTCCAG	P1P2	-3	1.0248	0.183333	0.0845593
GADD45A	chr2	68150934	-	23	GCGGCCCAATTAGTGTCGTG	P1P2	44	-0.0420552	0.0391304	0.412069
GADD45A	chr11	68150946	-	23	GTGTCGTGCGGCCCGTGGCG	P1P2	56	0.899037	0.0913044	0.297886
GADD45A	chr11	68150956	-	24	GGCCCGTGGCGAGGCGAGGTC	P1P2	66	0.710915	0.0791667	0.0729147
GADD45A	chr11	68150984	-	23	GAGCGAGCAAGCAAGGCGGG	P1P2	94	0.594171	0	0.16498
GALT	chr11	34646678	+	23	GAGGCCACCGGGGGATCCGC	P1P2	-11	0.97618	0.147826	0.036544
GALT	chr11	34646688	+	22	GCGCGACATGAGGCCACCG	P1P2	-1	0.928797	0.245455	0.222504
GALT	chr11	34646772	+	22	GGTGCAGTTACCGTTTGCC	P1P2	83	0.619619	0.222727	0.283075
GALT	chr11	34646854	+	22	GAGCGTTCCAACCTTCGGA	P1P2	165	1.09502	0.127273	0.710743
GALT	chr11	34646879	+	24	GTACGCCTTGTCGGTCTGGCT	P1P2	190	0.520915	0.2	0.0501745
GALT	chr11	34646614	-	22	GCGGCTGGCCAATCATCGG	P1P2	-75	0.855949	0	0.0830966
GALT	chr11	34646622	-	24	GGCCAATCATCGGGGGCGGCG	P1P2	-67	0.0731979	0	0.26266
GALT	chr13	34646749	-	23	GCAACGCCAGCAGGCGTCAG	P1P2	60	0.635934	0.43913	0.178109
GALT	chr13	34646812	-	24	GCACCGCGGCAGGGACTCGCT	P1P2	123	0.756163	0.1	0.0531586
GALT	chr13	34646864	-	24	GGAAGCTTTCGTCCCCTCCGA	P1P2	175	0.926536	0.1	0.23207
GATA1	chr13	48644988	+	23	GGCAAGCTCAGTGTGATCCC	P1P2	-17	1.25599	0.121739	0.0944821
GATA1	chr13	48645015	+	24	GCGGAGGGTTCGGCCGCCTTG	P1P2	10	0.486622	0.495833	0.147131
GATA1	chr13	48645032	+	24	GACCTGGGCTGGTGGTTGCGG	P1P2	27	0.481371	0.704167	0.0831987
GATA1	chr13	48645078	+	24	GCAGGCCCAGGGTTGCCTTGG	P1P2	73	0.321646	1.5	0.00183524
GATA1	chr13	48645106	+	24	GCCTGGAGCAAGCATAAGGGT	P1P2	101	0.497994	0.529167	0.152239
GATA1	chr13	48645111	+	24	GGGGAGCCTGGAGCAAGCATA	P1P2	106	0.273425	0.379167	0.134635
GATA1	chr13	48645235	+	24	GCAGAAAGAGGTGGGGTTTAG	P1P2	230	0.112363	1.3375	0.0485053
GATA1	chr6	48645025	-	24	GAGCTTGCCACATCCCCAAGG	P1P2	20	1.24601	0.220833	0.389315
GCLC	chr6	53409805	+	24	GAAGAAGCCAGTGCACCAGAC	P1P2	85	0.743033	0	0.324332
GCLC	chr6	53409828	+	24	GCGCAGGTTTTGGTCACAAGT	P1P2	62	1.37016	0	0.227182
GCLC	chr6	53409839	+	24	GCTCCGCGGCGGCGCAGGTTT	P1P2	51	0.869382	0.0458333	0.0216751
GCLC	chr6	53409694	-	24	GGCAGAAGACCGAGAGCAGGC	P1P2	196	0.760454	0	0.354115
GCLC	chr6	53409705	-	24	GAGAGCAGGCGGGACGGCTCT	P1P2	185	-0.0699513	0	0.0376787
GCLC	chr6	53409713	-	24	GCGGGACGGCTCTCGGCCCGG	P1P2	177	0.669236	0	0.243796
GCLC	chr6	53409808	-	24	GCGGCTCCCGCTTCTCTTTGC	P1P2	82	0.0213189	0	0.10051
GCLC	chr6	53409901	-	24	GTCCGCTAGCTCGCCGCTCCT	P1P2	-11	0.677375	0.1	0.111692
GCLC	chr6	53409936	-	24	GCTCCAGGTTTTATAGACTAC	P1P2	-46	0.172522	0.0375	0.0707711
GCLC	chr16	53409942	-	24	GGTTTTATAGACTACGGGCGA	P1P2	-52	-0.0130981	0.0125	0.08401
GCLM	chr16	94374677	+	24	GCGGCCAAGGCGCTCCTGGCG	P1P2	269	-0.00638562	0	0.0278661
GCLM	chr16	94374682	+	24	GCCGCGCGGCCAAGGCGCTCC	P1P2	264	-0.0379191	0	0.00336942
GCLM	chr16	94374780	+	23	GGGCACCGCGTCCTGTGGGG	P1P2	166	0.540029	0	0.374705
GCLM	chr16	94374785	+	24	GGCCTCGGGCACCGCGTCCTG	P1P2	161	0.475342	0	0.0531643
GCLM	chr16	94374807	+	24	GCTCCCTCTCGGGTCTCTCTC	P1P2	139	0.612217	0	0.0838423
GCLM	chr16	94374736	-	24	GCCCATGGCAGCGGCCGCCCA	P1P2	210	0.363034	0	0.0135522
GCLM	chr16	94374752	-	24	GCCCAGGGGCCGCGCAGCGAA	P1P2	194	-0.0202218	0	0.144509
GCLM	chr16	94374826	-	24	GAGGCCCGAGAGAGACCCGAG	P1P2	120	1.1309	0	0.433427
GCLM	chr16	94374836	-	23	GAGACCCGAGAGGGAGCGCG	P1P2	110	0.894747	0	0.760069
GCLM	chr16	94374989	-	24	GGGAGAGCTGATTCCAAACTG	P1P2	-43	0.97435	0	0.476108
GFI1B	chr16	135820893	+	24	GAGtgagcatttactaggcgc	P1P2	-33266	0.0288272	1.075	0.106486
GFI1B	chr16	135821154	+	24	Gccgcctcgcctggttctatt	P1P2	-33005	0.0198129	0.633333	0.193313
GFI1B	chr16	135854157	+	25	GTGGGAACTGCAAAGCCTCTCT	P1P2	-2	0.729051	0.56	0.0370834
GFI1B	chr16	135854181	+	24	GGGTTCTGCCGGAGCTTCCCG	P1P2	22	0.737857	0.7	0.697813
GFI1B	chr16	135854202	+	24	GTCCGGAGCTGTCCCTCGCCT	P1P2	43	0.0752354	0.983333	0.26581
GFI1B	chr16	135854273	+	24	GTGAAGCCACCTGCGGCGCAC	P1P2	114	0.215242	0.929167	0.141119
GFI1B	chr16	135862117	+	24	GCGGTTCATCTTCCTGCACAC	P1P2	7958	0.00642045	0.4	0.184572
GFI1B	chr16	135862154	+	24	GGCTCTGACTCACCCGGGGTA	P1P2	7995	0.0927868	0.6125	0.0270079
GFI1B	chr16	135862159	+	24	GCCCGGGCTCTGACTCACCCG	P1P2	8000	-0.026564	0.5875	0.571022
GFI1B	chr7	135862188	+	25	GAGAGCCCCCCGTGGGTGCAGC	P1P2	8029	-0.0441013	0.396	0.0565397
GFI1B	chr7	135862242	+	24	GAAGAAGAGGCTGCTGCAGGA	P1P2	8083	0.066286	0.283333	0.361765
GFI1B	chr7	135820926	-	24	GtaaatgctcaCTCACTAGAT	P1P2	-33233	0.0663734	0.845833	0.107808
GFI1B	chr7	135820943	-	23	GATAGGTGGCCTTTATTGCG	P1P2	-33216	-0.00385512	0.443478	0.624875
GFI1B	chr7	135821021	-	24	GAGTGAGATGAAGTCGAACTG	P1P2	-33138	0.0365343	2.65833	0.405406
GFI1B	chr7	135821032	-	23	GTCGAACTGTgggatatgaa	P1P2	-33127	0.0290742	2.56087	0.180941
GFI1B	chr7	135854187	-	23	GGCTTTGCAGTTCCCACCTC	P1P2	28	0.964216	0.569565	0.0642014
GFI1B	chr7	135854196	-	23	GTTCCCACCTCGGGAAGCTC	P1P2	37	1.27462	0.586957	0.319713
GFI1B	chr7	135854213	-	24	GCTCCGGCAGAACCCAGGCGA	P1P2	54	0.761165	0.833333	0.190455
GFI1B	chr7	135854287	-	23	GAAATGTGCCTGTGCGCCGC	P1P2	128	0.0418576	1.03478	0.0197504
GFI1B	chr7	135854343	-	25	GCGGTCCTAGGAAAGGTGAGGT	P1P2	184	0.227898	1.352	0.133502
GFI1B	chr7	135854375	-	24	GCTCTGGAAGGCAAGGAGCCA	P1P2	216	0.0223056	0.645833	0.0369344
GFI1B	chr7	135862145	-	22	GCAGGAAGATGAACCGCTC	P1P2	7986	0.0330734	0.4	0.0178636
GFI1B	chr7	135862204	-	24	GCTGGCGCCTGCTGCACCCAC	P1P2	8045	-0.0518504	0.35	0.0218737
GFI1B	chr7	135862229	-	24	GGCTCTCTGCTCTGCGTGATG	P1P2	8070	-0.0388348	0.491667	0.107059
GFI1B	chr7	135862297	-	24	GAAACAGGAGTGCAGTAACTG	P1P2	8138	0.0498605	0.479167	0.0645553
GINS1	chr7	25388451	+	23	GGCTTTTTCGCAGAACATGG	P1P2	79	0.0136316	1.06087	0.644801
GINS1	chr7	25388472	+	24	GCAGCTCGCGGATCAGTTCCA	P1P2	100	0.39292	0.858333	0.355278
GINS1	chr7	25388334	-	23	GGCGCCAAAGCGCGGAGCGG	P1P2	-38	1.11239	0.108696	0.129557
GINS1	chr10	25388512	-	24	GAGCTGCATCGCGCGCCCGAA	P1P2	140	0.826133	0.533333	0.394758
GINS1	chr10	25388541	-	24	GCCTGCCTTCAACGTGAGGGG	P1P2	169	0.775399	0.1	0.511252
GINS1	chr10	25388556	-	22	GGGGCGGGTAGACTTGGAC	P1P2	184	0.802924	0.0590909	0.00268653
GINS1	chr10	25388565	-	24	GTAGACTTGGACGGGGCATGC	P1P2	193	1.06148	0.025	0.0270397
GINS1	chr10	25388571	-	22	GGACGGGGCATGCCGGCGT	P1P2	199	0.696667	0	0.00755068
GINS1	chr10	25388579	-	24	GGCATGCCGGCGTTGGGCCCT	P1P2	207	0.146318	0.0208333	0.00644448
GINS1	chr10	25388608	-	23	GGCGGGGCGGCTCCCCGTCA	P1P2	236	-0.00702716	0.286957	0.0327939
GINS4	chr10	41386707	+	22	GGCACGACGTCATCGCGCA	P1P2	-80	0.0213055	0.1	0.0755151
GINS4	chr10	41386837	+	24	GCGTTCGTGGGGACGCAGTCG	P1P2	50	0.77973	0.6875	0.033703
GINS4	chr10	41386850	+	22	GTAAGGACGGGGCGTTCGT	P1P2	63	0.847926	1.23636	0.0998431
GINS4	chr22	41386758	-	24	GAAACTTTGCGAGAGTAGCGC	P1P2	-29	0.484087	0.0833333	0.408375
GINS4	chr22	41386775	-	24	GCGCGGGAGCTGAGAAGTTGC	P1P2	-12	0.248512	0.0125	0.026459
GINS4	chr22	41386791	-	24	GTTGCAGGGTTGAGTTGGTCC	P1P2	4	1.17896	0	0.110354
GINS4	chr22	41386886	-	23	GTCCTTACCGCCGGCTGCTG	P1P2	99	0.256161	1.82609	0.0279499
GINS4	chr22	41386930	-	24	GTCCCCGAGTGAGCGTCGAAT	P1P2	143	0.282001	0.7	0.294395
GINS4	chr22	41386940	-	24	GAGCGTCGAATGGGACCTCTG	P1P2	153	0.97311	0.433333	0.0265564
GINS4	chr22	41387017	-	23	GCAGTTTCCTTGCGACCCCA	P1P2	230	0.0821878	0.26087	0.838849
GPI	chr22	34856063	+	24	GCGCGGCGGCCTTTATGGCGC	P1P2	-50	0.101571	0	0.0705699
GPI	chr22	34856089	+	24	GCGCGCAGCAAGCGAGGCGCG	P1P2	-24	0.885129	0.129167	0.0765819
GPI	chr3	34856115	+	24	GAGCCGAGGAGGAAGGAGCGC	P1P2	2	1.28423	0.0583333	0.332374
GPI	chr3	34855958	-	23	GAGCTGAGGCCCCAGATCAG	P1P2	-155	0.0573465	0	0.228957
GPI	chr3	34855964	-	24	GAGGCCCCAGATCAGCGGCCG	P1P2	-149	0.092126	0	0.194622
GPI	chr3	34855981	-	24	GCCGCGGGCAAGGTCGCTCAG	P1P2	-132	-0.00157461	0	0.248738
GPI	chr3	34856001	-	21	GGCACCCGGCCTGGGTAT	P1P2	-112	0.207118	0	0.0322315
GPI	chr3	34856016	-	24	GGGTATcggggcgcgggtcgg	P1P2	-97	0.0770325	0	0.314877
GPI	chr3	34856118	-	24	GCCTCGCTTGCTGCGCGCTGC	P1P2	5	0.0260365	0.129167	0.0533441
GPI	chr3	34856174	-	24	GTGTACCTTCTAGTCCCGCCA	P1P2	61	0.830637	0.0791667	0.513895
GTF2B	chr3	89357030	+	24	GAAGCGGCGGGACTGGCCGAC	P1P2	210	0.00434395	0.1875	0.0335013
GTF2B	chr3	89357078	+	22	GCCTCCGGGCAGCCTCGTA	P1P2	162	0.757149	0.0954546	0.0212022
GTF2B	chrX	89357092	+	23	GCCGGCTTTTAGGCGGCCTC	P1P2	148	0.0697266	0.00434783	0.0115956
GTF2B	chrX	89357102	+	24	GCGCGAGCGCCGCCGGCTTTT	P1P2	138	-0.0693135	0	0.00977435
GTF2B	chrX	89357178	+	24	GCACCGCAGTCGCCGTGAAGA	P1P2	62	0.510152	0.191667	0.0605505
GTF2B	chrX	89357037	-	23	GTGCCTTTGTCCCGGCCCGT	P1P2	203	0.773946	0.334783	0.308317
GTF2B	chrX	89357167	-	24	GGCTCGGCGGGACATACTAAC	P1P2	73	1.41397	0.1	0.526321
GTF2B	chrX	89357171	-	23	GGCGGGACATACTAACCGGC	P1P2	69	0.812086	0.1	0.518281
GTF2B	chrX	89357324	-	23	GCAGAGCAGGGCTACGGGTC	P1P2	-84	0.250123	0.373913	0.0130491
GTF2B	chrX	89357330	-	24	GCAGGGCTACGGGTCGGGAGA	P1P2	-90	0.238381	0.2875	0.00349259
GTF2H1	chrX	18343836	+	24	GTAATCGCGACCGCGGCCTGA	P1P2	-292	-0.0565842	0	0.211132
GTF2H1	chrX	18343984	+	24	GCCTGTTTCGTTTCCTCTCTC	P1P2	-144	0.0059418	0.120833	0.321438
GTF2H1	chr3	18344075	+	24	GGAAGTAGCAAGGCGGGCCCT	P1P2	-53	0.00970747	0.0625	0.054516
GTF2H1	chr3	18344082	+	23	GTGACCGGAAGTAGCAAGGC	P1P2	-46	-0.09601	0.0347826	0.0618927
GTF2H1	chr3	18344199	+	24	GCGCTTCTTAGAGCCGCTGCT	P1P2	71	0.194463	1.64583	0.490873
GTF2H1	chr3	18344260	+	24	GTGGAAGCTACAACTCTAGAC	P1P2	132	0.293941	0.00833333	0.465656
GTF2H1	chr3	18344378	+	24	GCGACAGCGACGCTGGGAACA	P1P2	250	0.408894	1.03333	0.056077
GTF2H1	chr3	18344386	+	23	GAGGACGGCGACAGCGACGC	P1P2	258	0.186025	1.2087	0.0476483
GTF2H1	chr3	18343870	-	22	GTCGCGATTACGCTCTCTA	P1P2	-258	-0.00570187	0	0.357545
GTF2H1	chr3	18343907	-	24	GGCCGTTGCGGGCTGGAGACA	P1P2	-221	0.00545147	0.179167	0.121742
GTF2H1	chr3	18343947	-	23	GGAGCTCTAGGCCAAATGGT	P1P2	-181	-0.0785936	1.21304	0.36133
GTF2H1	chr3	18343987	-	24	GGACCCTTCGCCGCTCGAGAC	P1P2	-141	0.00416996	0.633333	0.110001
GTF2H1	chr3	18344051	-	24	GGGAACTAGCGGAAGGTGTCA	P1P2	-77	0.217686	0	0.0699871
GTF2H1	chr3	18344081	-	23	GCTCTTGAGTCACGTGCCCA	P1P2	-47	-0.0902757	0.0739131	0.512963
GTF2H1	chr3	18344160	-	23	GCGAGACCCCCTAGTAACAG	P1P2	32	1.83513	0.0782609	0.371651
GTF2H1	chr3	18344186	-	24	GTGGCTACTGCTGCGGCCACT	P1P2	58	0.0199378	0.8625	0.298182
GTF2H1	chr3	18344238	-	23	GAAGCGCAGCGGAACTCGAC	P1P2	110	0.214804	1.7	0.15703
GTF2H1	chr3	18344314	-	24	GTTTAGACCGAAGAATgcagg	P1P2	186	0.27452	0	0.364346
GTF2H1	chr3	18344318	-	23	GACCGAAGAATgcaggcggg	P1P2	190	0.755974	0	0.294365
GTF2H1	chr3	18344352	-	24	Gggtgaggagctgacaggcct	P1P2	224	0.0781599	0.1375	0.193313
GTF2H3	chr10	124118449	+	23	GGACCGAGACAGCCGAGCCC	P1P2	57	0.871973	2.46087	0.421573
GTF2H3	chr10	124118484	+	24	GCCCAAAAGACACATTCCATC	P1P2	92	0.0983027	4.33333	0.122886
GTF2H3	chr10	124118518	+	24	GCTACTCCTCTAAAGACCAAA	P1P2	126	0.11052	0.983333	0.929163
GTF2H3	chr10	124118583	+	25	Gaaaataatgcctgtacacagg	P1P2	191	0.0905344	0.172	0.193313
GTF2H3	chr10	124118452	-	23	GCAGGGCGGGACTTCGACTC	P1P2	60	0.110902	1.14783	0.073169
GTF2H3	chr10	124118468	-	24	GACTCCGGGGCTCGGCTGTCT	P1P2	76	0.0846332	2.10833	0.00982804
GTF2H3	chr10	124118483	-	22	GTCTCGGTCCGGCTACGAC	P1P2	91	0.296615	3.69545	0.123012
GTF2H3	chr10	124118491	-	24	GTCCGGCTACGACTGGCCAGA	P1P2	99	0.242029	4.40833	0.189652
GTF2H3	chr10	124118525	-	22	GGGCTGGATAGAATCCGTT	P1P2	133	0.0665415	2.41364	0.420344
GTF2H3	chr10	124118651	-	24	Gacagacaggggccttagtgg	P1P2	259	0.30335	0.945833	0.193313
GTF2H4	chr11	30876000	+	24	GAATGGAGAATTCagaagaga	P1P2	-12	0.766871	0.1	0.183818
GTF2H4	chr11	30876034	+	25	GGAAAGCAAAGAAAGATTTCAC	P1P2	22	0.467825	0.232	0.063666
GTF2H4	chr11	30876068	+	24	GAAAGATGGTGAAAAAATGCG	P1P2	56	0.0411434	2.20833	0.77733
GTF2H4	chr11	30876101	+	25	GCCAAAGTCTCGCATTGGCTCC	P1P2	89	-0.0228773	5.636	0.0119419
GTF2H4	chr11	30876127	+	23	GTCTCGGGCCGTCGCTTAAT	P1P2	115	0.10513	1.54783	0.157779
GTF2H4	chr11	30876164	-	25	GGCCCGAGACTCGGGGTGCGCG	P1P2	152	0.145914	0.372	0.179561
GTF2H4	chr11	30876167	-	23	GAGACTCGGGGTGCGCGAGG	P1P2	155	0.960219	0.247826	0.0367666
GTF2H4	chr11	30876185	-	23	GGAGGATCGACAGAGTGGTG	P1P2	173	1.03485	0.2	0.158169
GTF2H4	chr11	30876198	-	24	GAGTGGTGAGGGGACCTAGGA	P1P2	186	0.873718	0.175	0.264744
GTF2H4	chr11	30876207	-	24	GGGGACCTAGGAGGGCgggag	P1P2	195	1.00493	0.1375	0.16405
GTF2H5	chr5	158589557	+	24	GGAAGGGCCCGGAGAGAGTGG	P1P2	157	0.247439	0.783333	0.293144
GTF2H5	chr5	158589574	+	24	GCCGTGCGGCCCCGCCAGGAA	P1P2	174	1.41525	0.195833	0.121935
GTF2H5	chr5	158589373	-	24	GTCCCTAGCGCGATGGCGTAT	P1P2	-27	0.712086	0	0.159345
GTF2H5	chr5	158589403	-	23	GCACTCTGCCGGCAACGCCG	P1P2	3	0.358919	0.026087	0.842421
GTF2H5	chr5	158589449	-	24	GGTGTGTGGCGAGCGTCCGAG	P1P2	49	0.872664	0.0791667	0.883634
GTF2H5	chr5	158589453	-	23	GTGGCGAGCGTCCGAGCGGC	P1P2	53	0.156988	0.0608696	0.023919
GTF2H5	chr5	158589482	-	24	GTGGGGTGTGGGAACACTGAG	P1P2	82	0.318163	0.1875	0.317521
GTF2H5	chr5	158589573	-	24	GCGGTGTCCCCCACTCTCTCC	P1P2	173	0.120646	1.07917	0.0210538
GTF2H5	chr5	158589633	-	24	GTTTAATCGTGGGTTTCCTGT	P1P2	233	0.258456	0	0.421319
GTPBP4	chr5	1034336	+	24	GGTGGGACTTCCACTGTCGGG	P1P2	-75	-0.0566568	0.0875	0.636324
GTPBP4	chr6	1034455	+	24	GGGGCCGCCTACCTTGGCGGA	P1P2	44	0.010913	0.379167	0.372254
GTPBP4	chr6	1034532	+	24	GCTCTCCCACGGCTACAGGCC	P1P2	121	0.256564	0.05	0.0575622
GTPBP4	chr6	1034604	+	22	GGAAATGATCCCGAGTACG	P1P2	193	0.996222	0.1	0.535213
GTPBP4	chr6	1034349	-	23	GTACCTCAACCGCCCGACAG	P1P2	-62	0.0362615	0.026087	0.377933
GTPBP4	chr6	1034374	-	23	GTCCCACCTGCGCCCGACGG	P1P2	-37	0.0834381	0.178261	0.189845
GTPBP4	chr6	1034422	-	24	GCGTGCATACGGCTGCCGGCA	P1P2	11	1.20215	0.1125	0.0289409
GTPBP4	chr6	1034474	-	24	GGTGCCGTCCGCCAAGGTAGG	P1P2	63	0.0433196	0.266667	0.102464
GTPBP4	chr6	1034549	-	24	GAGGGTCCGGGCCTGTAGCCG	P1P2	138	-0.0223999	0.133333	0.0102981
GTPBP4	chr6	1034615	-	22	GACCGTCTGGCCGCGTACT	P1P2	204	0.777236	0.1	0.0522279
HADHB	chr6	26467723	+	24	GGCGGTCAGGGCCGTTCTTGA	P1P2	-94	0.181237	0	0.111909
HADHB	chr6	26467742	+	22	GGGCCCCTCACCCCGCGGG	P1P2	-75	0.781478	0	0.109363
HADHB	chr6	26467778	+	23	GGCTCTGCGGGACCAAGGGG	P1P2	-39	1.28548	0.0347826	0.186396
HADHB	chr6	26467853	+	23	GAGGGCTCGCCGTCTCACCT	P1P2	36	0.877426	0.443478	0.254021
HADHB	chr6	26467922	+	22	GGGGCACCGGCGACAGTTG	P1P2	105	0.419379	1.10909	0.0605623
HADHB	chr6	26467758	-	24	GCCCTGACCGCCCGCGGGGTG	P1P2	-59	0.0476411	0	0.00672308
HADHB	chr6	26467771	-	24	GCGGGGTGAGGGGCCCTTTCT	P1P2	-46	0.829898	0	0.00798662
HADHB	chr6	26467833	-	23	GACCTGAACCTTGCTCCGAG	P1P2	16	0.837092	0.226087	0.446273
HADHB	chr6	26468011	-	23	GGAAACTCCTCGGACAAGGT	P1P2	194	0.791431	0.273913	0.484929
HADHB	chr6	26468043	-	24	GCTGCAGTTAGGACAGTGACT	P1P2	226	0.462583	0.125	0.156092
HAUS1	chr6	43684251	+	24	GCCCGGGATTTCTGGGAGTTG	P1P2	-122	0.104752	0.2375	0.0278663
HAUS1	chr6	43684274	+	23	GTTGGCACCCGCCCCTCGCC	P1P2	-99	-0.00795433	0.195652	0.109645
HAUS1	chr6	43684350	+	23	GCGGCTCCCGCCACTTTACT	P1P2	-23	1.46504	0.0217391	0.0887323
HAUS1	chr6	43684461	+	22	GAGACCCGCTGTCGGCGCG	P1P2	88	0.0686198	0.590909	0.437265
HAUS1	chr6	43684539	+	22	GGCTTGCAGATAGTGACGG	P1P2	166	0.77537	0	0.708449
HAUS1	chr6	43684329	-	24	GCGGGGCCTAGGGAGTGAGCG	P1P2	-44	0.759587	0	0.320777
HAUS1	chr6	43684345	-	24	GAGCGGGGCGCATCTCCCGCT	P1P2	-28	0.0788243	0	0.0737975
HAUS1	chr6	43684415	-	24	GAGAGAGAAACGCAGGTGATG	P1P2	42	0.59485	0.3375	0.08661
HAUS1	chr6	43684434	-	23	GGGGCGGGAATGGGGATCGT	P1P2	61	0.0306616	0.752174	0.0391861
HAUS1	chr6	43684442	-	24	GAATGGGGATCGTTGGCCTCC	P1P2	69	0.0302246	0.979167	0.0129393
HAUS5	chr6	36103843	+	24	GAGGGGTGGAGTTCTCACTCC	P1P2	144	0.0369608	0.166667	0.0364746
HAUS5	chr10	36103863	+	24	GGGGGAGTCGAGTCCTCAATG	P1P2	164	0.461143	0.00833333	0.109688
HAUS5	chr10	36103886	+	24	GGGTCACTCTCGATGGGGAAT	P1P2	187	0.0717358	0.0666667	0.0231572
HAUS5	chr10	36103892	+	21	GTCGGGTCACTCTCGATG	P1P2	193	0.342952	0.114286	0.26763
HAUS5	chr10	36103907	+	24	GTAGGGAGCCCTCAGTAAGTC	P1P2	208	0.179261	0.570833	0.0443802
HAUS5	chr10	36103644	-	23	GCGCCCGTGACGTCAGAGGC	P1P2	-55	0.0492691	0.0739131	0.143273
HAUS5	chr10	36103699	-	24	GTCGCCGCCGCGGCGCTGTCA	P1P2	0	1.00248	0	0.00793084
HAUS5	chr10	36103720	-	23	GGAGCTAGCGCAGGAAGCGC	P1P2	21	0.694733	0	0.183632
HAUS5	chr10	36103753	-	24	GCTGGGCGGTCGAAGAGATGG	P1P2	54	1.30279	0.125	0.181798
HAUS5	chr10	36103794	-	24	GCCCCGGAATCGACGCTGCGC	P1P2	95	0.0166559	1.2	0.028928
HMG20B	chr10	3573046	+	24	GGAAAGACCCCGGCCCGGCCC	P1	32	0.0830303	0	0.0159851
HMG20B	chr14	3573094	+	22	GGCGATTGCCCCCCCCGGG	P1	80	-0.0881019	0	0.173309
HMG20B	chr14	3573115	+	23	GCGCCCCAAGAATCCTTTGT	P1	101	0.0335775	0	0.182312
HMG20B	chr14	3573138	+	24	GGGCAGGGAAGTCCTCGAGGG	P1	124	0.887861	0	0.156757
HMG20B	chr14	3573209	+	24	GCGAACTGGGGTACCCCGCGA	P1	195	0.38255	0	0.0733468
HMG20B	chr14	3572928	-	24	Gaggggcggggcggccgacgg	P1	-86	0.0273894	0	0.193313
HMG20B	chr14	3572950	-	24	GgcgggctgcgggcggTTGGT	P1	-64	0.751546	0	0.117661
HMG20B	chr14	3572967	-	23	GGTTGGAGCGTCGCGCAGTC	P1	-47	0.890305	0	0.0739347
HMG20B	chr14	3573188	-	24	GATCCGGCCCCCCCAGCGCTC	P1	174	0.131124	0	0.0539101
HMG20B	chr14	3573204	-	23	GCTCCGGGCCCGGCATCCCG	P1	190	1.22183	0	0.690786
HSP90AB1	chr14	44214803	+	23	GCCCCAAGTCGCCCTATATA	P1P2	-38	0.781041	0.221739	0.137954
HSP90AB1	chr12	44215643	+	22	GGCCAGGACCACGCGAGGA	P1P2	802	0.658074	0.3	0.0984321
HSP90AB1	chr12	44215813	+	23	GGGATCCATACGATACCCAC	P1P2	972	0.835349	1.31739	0.620727
HSP90AB1	chr12	44215852	+	24	GCGGGACACTCCTGCCCCATA	P1P2	1011	0.207105	0.4	0.156329
HSP90AB1	chr12	44214813	-	24	GTACTGTGCTTCGCCTTATAT	P1P2	-28	0.582561	0.1125	0.077439
HSP90AB1	chr12	44214865	-	22	GTCACTCCGGCGCAGTGTT	P1P2	24	1.08116	0.218182	0.127047
HSP90AB1	chr12	44214875	-	24	GGCGCAGTGTTGGGACTGTCT	P1P2	34	0.733656	0.225	0.0972529
HSP90AB1	chr12	44214881	-	24	GTGTTGGGACTGTCTGGGTAT	P1P2	40	0.973334	0.266667	0.176481
HSP90AB1	chr12	44214954	-	23	GTAAGGCTGAGATCTCCGCT	P1P2	113	0.338307	0.647826	0.809996
HSP90AB1	chr12	44215032	-	24	GGGAGCCTTAGTCTAGATGTC	P1P2	191	0.116042	0.283333	0.26179
HSP90AB1	chr12	44215055	-	21	GGCTTGTGGATAACGCTC	P1P2	214	0.198951	0.266667	0.148864
HSP90AB1	chr12	44215066	-	24	GATAACGCTCTGGATTTTTAT	P1P2	225	-0.0443667	0.254167	0.402646
HSP90AB1	chr12	44215107	-	23	GAGGTTTTTTGAGTCCTCCT	P1P2	266	-0.0768882	0.704348	0.172613
HSP90AB1	chr12	44215618	-	23	GCCCCAGTGCCCGGATGCTG	P1P2	777	0.244032	0.247826	0.167427
HSP90AB1	chr12	44215677	-	22	GTCCTGGCCGACGCATGTC	P1P2	836	0.452644	0.3	0.165513
HSP90AB1	chr12	44215707	-	23	GAGTGTCGGCCTGGTGGCTA	P1P2	866	0.118637	0.265217	0.0213637
HSP90AB1	chr12	44215724	-	24	GCTACGGCCACCATCTTTCTT	P1P2	883	-0.117019	0.158333	0.484485
HSP90AB1	chr12	44215729	-	24	GGCCACCATCTTTCTTGGGTT	P1P2	888	0.00404854	0.116667	0.170167
HSP90AB1	chr12	44215769	-	23	GTGCTGTGAAAGGGTCGTGG	P1P2	928	0.115074	0.404348	0.351385
HSP90AB1	chr12	44215816	-	24	GTCCGGATTTAATTGCTCCTC	P1P2	975	0.0479481	1.84167	0.0138057
HSPA8	chr12	122932867	+	24	GGTTCTAAGATAGGGTATAAG	P1P2	-32	0.418446	0.1	0.392577
HSPA8	chr1	122932909	+	24	GAAGCCGTAATGGCAGGCAGC	P1P2	-74	0.0185996	0	0.0256338
HSPA8	chr1	122932934	+	23	GCAGCCGGGCGTCTATTGGC	P1P2	-99	0.0331523	0	0.105599
HSPA8	chr1	122932957	+	24	GGCTTGTGATTGGGTCTTGTA	P1P2	-122	-0.0559114	0.0291667	0.062057
HSPA8	chr1	122932980	+	24	GCGAGGCCCGAGGAGTGGAGC	P1P2	-145	0.0155374	0.1	0.0349966
HSPA8	chr1	122933016	+	24	GTGAGGCGGAGCGCGGTGGGG	P1P2	-181	0.135124	0.025	0.0601086
HSPA8	chr1	122933024	+	24	GCGTTATCGTGAGGCGGAGCG	P1P2	-189	0.750317	0	0.468532
HSPA8	chr1	122933034	+	23	GCGGTGAGTGCGTTATCGTG	P1P2	-199	0.454626	0.00434783	0.232622
HSPA8	chr1	122932787	-	24	GTTTTACCTGGGGTGTAGGCC	P1P2	48	-0.0907467	0.208333	0.0430423
HSPA8	chr1	122932848	-	23	GCAGGCGAGTTCAATGAGAC	P1P2	-13	1.03268	0.1	0.500632
HUS1	chr1	48018843	+	24	GGGGATGAAGGCGGCTTTCAA	P1P2	274	0.866161	0.1125	0.154141
HUS1	chr2	48018864	+	23	GcgggtcggagGGCACTTGT	P1P2	253	0.853152	0.0826087	0.0812753
HUS1	chr2	48018911	+	24	Gggggtgctggtgtaggccgc	P1P2	206	0.114439	0	0.193313
HUS1	chr2	48018964	+	24	Gatcagaacggggatgggcgc	P1P2	153	0.574881	0.1	0.193313
HUS1	chr2	48018987	+	24	Gcgcggtggggaccgcgcagg	P1P2	130	0.0563075	0.2625	0.193313
HUS1	chr2	48019001	+	23	Ggaagcagtgagcgcgcggt	P1P2	116	0.657494	0.352174	0.193313
HUS1	chr2	48019133	+	24	GTTACCCACAGAGGCCCGCCG	P1P2	-16	1.28069	0.0875	0.954655
HUS1	chr2	48019102	-	24	GACAGGCCCCGTCCACGATCT	P1P2	15	0.765911	0	0.0147432
HUS1	chr2	48019117	-	23	GATCTTGGCCCGAAACTTCA	P1P2	0	0.297152	0	0.248965
HUS1	chr2	48019123	-	23	GGCCCGAAACTTCATGGCCG	P1P2	-6	-0.0399605	0	0.724777
HUWE1	chr2	53710826	+	23	GTCCTCGTGGGATTCGTTGG	P1P2	91	1.18291	0.256522	0.184739
HUWE1	chr2	53710839	+	24	GGGAGCAGGGTTACGTCCTCG	P1P2	78	0.237031	0.3	0.105459
HUWE1	chr2	53710901	+	24	GTAGCCGCGGAGGCGGCGGCA	P1P2	16	-0.039555	0.1	0.0128853
HUWE1	chr2	53710915	+	23	GTTACTGACTGCAGTAGCCG	P1P2	2	-0.056852	0.104348	0.820639
HUWE1	chr2	53710963	+	22	GTCCGGTAGAGGTTCTCGC	P1P2	-46	0.937383	0.368182	0.688804
HUWE1	chr7	53710973	+	22	GGCTTTTCCCGTCCGGTAG	P1P2	-56	0.879705	0.304546	0.3082
HUWE1	chr7	53711129	+	24	GTTCTCAACGCATGCGGGAGC	P1P2	-212	0.00494537	0	0.0415777
HUWE1	chr7	53711136	+	23	GCGATAGTTCTCAACGCATG	P1P2	-219	0.115576	0	0.247792
HUWE1	chr7	53713379	+	24	GCCTTGGGGAGCCTGCGGGAA	P1P2	-2462	0.65189	0	0.0181019
HUWE1	chr7	53713408	+	24	GGACCCTGCGCGGAGGCGCGG	P1P2	-2491	0.644626	0	0.245731
HUWE1	chr7	53713463	+	22	GTTCTCGGTTTCTCGCGGG	P1P2	-2546	0.659127	0	0.0655628
HUWE1	chr7	53713505	+	23	GCGTCTATCCCTGGGCTGGA	P1P2	-2588	0.697553	0.1	0.562237
HUWE1	chr7	53713514	+	24	GCCGAGGTGAGCGTCTATCCC	P1P2	-2597	0.559977	0.0958333	0.0293888
HUWE1	chr7	53713537	+	24	GCGGGCCCCGCGGAGCCATTG	P1P2	-2620	0.578932	0	0.0520005
HUWE1	chr7	53713556	+	24	GCGGACCCCGCACGCTCCTGC	P1P2	-2639	0.429709	0.0375	0.136366
HUWE1	chr21	53713646	+	24	GCTTTCGACTGAGGGCTAGCG	P1P2	-2729	0.223655	0.1	0.616957
HUWE1	chr21	53713655	+	23	GCGAGGAGGCTTTCGACTGA	P1P2	-2738	0.351552	0.1	0.10776
HUWE1	chr21	53711107	-	24	GCACAACCTAACGAAGCAGTG	P1P2	-190	-0.140367	0.0875	0.313117
HUWE1	chr21	53711132	-	24	GCGGAGCCAACCTACCACGGC	P1P2	-215	-0.068	0	0.0807319
HUWE1	chr21	53713573	-	24	GCGGGGCCCGCAGGAGCGTGC	P1P2	-2656	0.342489	0.0333333	0.035974
IDH1	chr21	209118894	+	23	GCTAACGGGCGGCGAAGCGG	P1P2	885	0.657388	0.152174	0.338033
IDH1	chr21	209118909	+	24	GCAAACCCCAAGACCTGCTAA	P1P2	870	0.732638	0.220833	0.212332
IDH1	chr21	209118955	+	22	GCACAACGGCCATAAGGAC	P1P2	824	0.743061	0.0227273	0.134392
IDH1	chr21	209119007	+	25	GcgggCGTGGAGACCTGGAAGG	P1P2	772	0.553238	0.072	0.607577
IDH1	chr21	209119014	+	24	GgaggggcgggCGTGGAGACC	P1P2	765	0.713889	0.0583333	0.052649
IDH1	chr19	209119043	+	24	GGTCCCAGCACCAGCgagggg	P1P2	736	0.542558	0.1	0.381305
IDH1	chr19	209119589	+	24	GGCTCTAATTCCGCAGAAGGC	P1P2	190	1.04275	0.25	0.188887
IDH1	chr19	209119697	+	24	GTCTGAGCTTGTGAGCGGCTG	P1P2	82	0.877582	1.1625	0.050558
IDH1	chr19	209119733	+	24	GGAGTCCGGTTTGGGATTGCC	P1P2	46	0.766742	0.670833	0.220205
IDH1	chr19	209119743	+	24	GGAGGCACTGGGAGTCCGGTT	P1P2	36	0.918252	0.4625	0.0152614
IDH1	chr19	209119762	+	22	GAGTCTACTTCAGAAGCGG	P1P2	17	0.856658	0.163636	0.529549
IDH1	chr19	209119799	+	24	GAAAAGCTCGGACCTACCCTG	P1P2	-20	1.039	0	0.523288
IDH1	chr19	209119880	+	23	GATTGGAGGCGTGTCGGGGG	P1P2	-101	0.23138	0	0.0354867
IDH1	chr19	209118927	-	24	GCCGCCCGTTAGCAGGTCTTG	P1P2	852	0.741571	0.204167	0.0786786
IDH1	chr19	209118948	-	24	GGGTTTGCATGTCCTTGCTCT	P1P2	831	0.203952	0.145833	0.0395745
IDH1	chr19	209119080	-	23	GCTGGGACCTTTTAAACTCC	P1P2	699	0.515934	0.0695652	0.156393
IDH1	chr19	209119087	-	25	GACCTTTTAAACTCCAGGCACC	P1P2	692	0.239674	0.044	0.147942
IDH1	chr19	209119669	-	23	GGAGCCTGAGGTTACCTGCC	P1P2	110	0.395645	0.4	0.262984
IDH1	chr19	209119692	-	24	GATGATATGCTGGCGAAGAGT	P1P2	87	0.459148	0.9375	0.0618853
IDH1	chr19	209119796	-	24	GAAGTAGACTCTGCAGAAACC	P1P2	-17	0.754231	0.05	0.278644
IGF2BP1	chr19	47074820	+	22	GTCCGAAACCCCTCCGAGA	P1P2	-50	1.10023	0.0681818	0.429301
IGF2BP1	chr19	47074860	+	23	GCGCAGGGAGACGGACGACA	P1P2	-10	0.936079	0.2	0.506829
IGF2BP1	chr19	47074898	+	24	GGGAGAGTTCGGGGAGAGCCC	P1P2	28	0.479795	0.195833	0.45057
IGF2BP1	chr19	47074909	+	24	GCAGAGGTCGCGGGAGAGTTC	P1P2	39	0.371876	0.15	0.0499195
IGF2BP1	chr19	47074947	+	24	GTCCCGAGCCCAGGGCGGGGA	P1P2	77	0.0214768	0.145833	0.0149803
IGF2BP1	chr13	47074953	+	24	GAAGTTGTCCCGAGCCCAGGG	P1P2	83	0.759895	0.166667	0.236208
IGF2BP1	chr13	47075034	+	24	GGCGCGGGCGGCGAGCCTCCT	P1P2	164	0.839014	0	0.0291575
IGF2BP1	chr13	47074833	-	24	GACACACCAGCCCTCTCGGAG	P1P2	-37	0.793077	0.4	0.234317
IGF2BP1	chr13	47074848	-	22	GGAGGGGTTTCGGACCGAA	P1P2	-22	0.963691	0.0409091	0.738835
IGF2BP1	chr13	47075068	-	23	GCCGCCCGCGCCCGCTCGTT	P1P2	198	0.175251	0	0.0387308
IKZF3	chr13	38020342	+	26	GCCTCCAGCCCGCTTCTTTTCTC	P1P2	50	-0.0494011	1.2	0.0656692
IKZF3	chr13	38020375	+	22	GCCCGGCCCGGCAGCGACA	P1P2	17	0.280747	0.272727	0.170075
IKZF3	chr13	38020405	+	24	GGAGAGGCCGAGTAGCCACAG	P1P2	-13	0.918604	0	0.396189
IKZF3	chr13	38020422	+	25	GCGACGGCAGGAGCACGTGGAG	P1P2	-30	0.902718	0	0.0369164
IKZF3	chr13	38020183	-	24	GAAGAAGTTATCACTTTCCAA	P1P2	209	1.14944	1.43333	0.289345
IKZF3	chr1	38020189	-	24	GTTATCACTTTCCAAAGGGCG	P1P2	203	0.524758	1.41667	0.515245
IKZF3	chr1	38020390	-	25	GCTCACCTTCCATGTCGCTGCC	P1P2	2	0.782535	0.448	0.24973
IKZF3	chr1	38020413	-	24	GCCGGGCTGGAGCTGCCGCTG	P1P2	-21	0.679751	0.0708333	0.00276379
IKZF3	chr1	38020421	-	24	GGAGCTGCCGCTGTGGCTACT	P1P2	-29	0.93196	0.0166667	0.116003
IKZF3	chr1	38020486	-	24	GCTGGCGGGAGATTCCCGGCG	P1P2	-94	0.465939	0.1	0.211531
IMPDH2	chr1	49066549	+	24	GGAATTGGCCACCCACCTCCG	P1P2	272	0.172023	0.925	0.501757
IMPDH2	chr1	49066597	+	24	GGGGCTTCCGAGAGCCGCCTT	P1P2	224	0.0804033	0.166667	0.0683575
IMPDH2	chr1	49066634	+	24	GAAGAGAGGGGCGGCACCCTG	P1P2	187	0.393858	0.104167	0.0465506
IMPDH2	chr1	49066703	+	23	GCACAGCAGCTCTTCAACTG	P1P2	118	0.197654	0.6	0.681017
IMPDH2	chr5	49066798	+	24	GCGGTCCTCGGAGACACGCGG	P1P2	23	1.93227	0.0166667	0.747639
IMPDH2	chr5	49066811	+	23	GGTCTCTGCGGCGCGGTCCT	P1P2	10	0.484163	0.0130435	0.11535
IMPDH2	chr5	49066664	-	24	GTGCCGCCCCTCTCTTCGCCC	P1P2	157	0.13505	0.129167	0.174251
IMPDH2	chr5	49066691	-	24	GCCCCATAGGCCCGCACTTGT	P1P2	130	0.2508	0.545833	0.01427
IMPDH2	chr5	49066743	-	22	GTGCTGTGAGTCCGTCGTC	P1P2	78	0.316334	0.254545	0.0839617
IMPDH2	chr5	49066771	-	22	GGACGTGCCCCCACTAATC	P1P2	50	0.583571	0.363636	0.108178
INCENP	chr5	61891542	+	22	GCCCAGACCCACTTGGCTC	P1P2	7	0.753134	0.15	0.0492504
INCENP	chr5	61891572	+	24	GTCCGGTGGTATCCCTAGGTA	P1P2	37	0.826911	0.2	0.0401438
INCENP	chr5	61891610	+	23	GACTGCGCCACGTCCCCTGA	P1P2	75	0.604837	0.352174	0.164404
INCENP	chr5	61891689	+	24	GAGTCGACAGGGACGGAGCAG	P1P2	154	0.66222	0.05	0.330334
INCENP	chr9	61891712	+	23	GGGGAGTCACGACCCTGGTC	P1P2	177	0.61785	0.108696	0.0275333
INCENP	chr9	61891583	-	24	GGGCAAGCGGGGCCTTACCTA	P1P2	48	0.825832	0.158333	0.0732399
INCENP	chr9	61891604	-	24	GGGATACCACCGGACTTGGAT	P1P2	69	0.412356	0.2	0.266504
INCENP	chr9	61891625	-	23	GGAGCAGCCTTCAGGGGACG	P1P2	90	0.325661	0.282609	0.18664
INCENP	chr9	61891664	-	24	GCGCGTGGGCGTGGGGATTGG	P1P2	129	0.168478	0.229167	0.0271693
INCENP	chr9	61891722	-	24	GTCCCTGTCGACTCCGGACCA	P1P2	187	0.0571022	0.0333333	0.409562
ING5	chr9	242641447	+	23	GGCCGCGCTCGGGGTCTgcg	P1P2	-31	1.1415	0	0.221702
ING5	chr9	242641468	+	23	GCGGTCGCCATCTTCGTCCG	P1P2	-10	1.0084	0	0.634457
ING5	chr9	242641549	+	22	GGCACGGAGGACTCCGCGT	P1P2	71	0.850104	0	0.262905
ING5	chr9	242641578	+	23	GCATGCGGTGCCCGGCGCGC	P1P2	100	-0.0425689	0	0.0731786
ING5	chr17	242641717	+	24	Gaattggcgcgacccagccgg	P1P2	239	0.542282	0	0.193313
ING5	chr17	242641612	-	23	GCACCGCATGCAGACCCCGT	P1P2	134	0.721245	0	0.38955
ING5	chr17	242641648	-	24	Gcgggcgcggccgggcgcgac	P1P2	170	0.342476	0	0.193313
ING5	chr17	242641664	-	24	Gcgacggggggcgcgcggacg	P1P2	186	0.374345	0	0.193313
ING5	chr17	242641744	-	22	Gctgggtcgcgccaattcc	P1P2	266	0.297134	0	0.193313
ING5	chr17	242641754	-	24	Gcgccaattccaggtgcgtca	P1P2	276	0.196292	0	0.193313
KAT7	chr17	47865885	+	24	GGCAGAAAGTGACTCCAGTGG	P1P2	-175	0.207855	0.258333	0.654078
KAT7	chr17	47865938	+	23	GCTGGGAAGTTCGATCCTTT	P1P2	-122	-0.00567146	0.1	0.329384
KAT7	chr17	47865973	+	24	GTCTCGCGTCACCTGACGTTA	P1P2	-87	0.0938693	0.104167	0.126208
KAT7	chr17	47866162	+	23	GCGGCCCGACGGTTCCGATT	P1P2	102	0.163543	0.386957	0.0507038
KAT7	chr17	47865894	-	24	GTTGGCTCCGGGTTCCACCAC	P1P2	-166	0.104563	0.316667	0.0286929
KAT7	chr17	47866013	-	24	GCGAGACCCAGCCGGAAGTGA	P1P2	-47	0.255941	0.345833	0.10765
KAT7	chr17	47866099	-	21	GGGATCGTCCGCAGGATT	P1P2	39	1.58007	0	0.0269954
KAT7	chr17	47866121	-	24	GGACTGATACAGAGGCCGCCA	P1P2	61	0.816608	0	0.323957
KAT7	chr17	47866180	-	24	GCTGCCCGAATCGGAACCGTC	P1P2	120	0.0202266	0.4	0.230474
KAT7	chr17	47866211	-	23	GCCGGCAATGCCGCGAAGGA	P1P2	151	0.603325	0.147826	0.0741189
KDM1A	chr6	23346032	+	22	GCTCGCTCTGTCGCTCCGT	P1P2	-19	-0.00385761	0	0.0637117
KDM1A	chr6	23346057	+	24	GCCGGGCCGCCGACGGCCGTA	P1P2	6	0.136587	0	0.143124
KDM1A	chr6	23346210	+	23	GGCTGGGCCCGACAGGCCCG	P1P2	159	-0.0766345	0	0.257963
KDM1A	chr6	23345979	-	24	GCTTGGCGCGTGCGTACGCGA	P1P2	-72	0.050351	0	0.564378
KDM1A	chr6	23345982	-	22	GCGCGTGCGTACGCGACGG	P1P2	-69	0.796279	0	0.46883
KDM1A	chr6	23346012	-	24	GCGCGCGGGCAGCGTGAAGCG	P1P2	-39	1.48099	0	0.34098
KDM1A	chr6	23346030	-	24	GCGAGGCGAGGCAAGGCTTTT	P1P2	-21	0.105317	0	0.0320862
KDM1A	chr6	23346071	-	24	GCGAGCGGCCCCTACGGCCGT	P1P2	20	0.17461	0	0.0513661
KDM1A	chr6	23346100	-	23	GGCGGCCCGAGATGTTATCT	P1P2	49	0.480445	0.0695652	0.0305472
KDM1A	chr6	23346189	-	24	GACAGCAGGCGGCTCCGAGAA	P1P2	138	0.722728	0	0.170476
KEAP1	chr6	10613303	+	24	GAGCGCCCCTGCGGCCGTGCC	P1P2	683	0.0989924	0	0.0218528
KEAP1	chr6	10613348	+	24	GTGAGTGAGGCGGGATGTGCC	P1P2	638	0.102103	0	0.0285295
KEAP1	chr6	10613372	+	24	GAGCCGGAGCGCGGCCATGGC	P1P2	614	1.39863	0	0.0181162
KEAP1	chr6	10613382	+	24	GGTGGAGGCGGAGCCGGAGCG	P1P2	604	0.0542108	0	0.375654
KEAP1	chr6	10613466	+	24	GCGCCCGGCTCTGCTTAGTCA	P1P2	520	0.547363	0	0.0752736
KEAP1	chr6	10613490	+	24	GGGACTTTTATTGTGACACGG	P1P2	496	0.109808	0	0.75339
KEAP1	chr6	10613561	+	24	GGCGACAGCAGGCGTGGGCGG	P1P2	425	0.374878	0	0.291413
KEAP1	chr6	10614156	+	25	GAGATGGAAGGGACAGTGAGAA	P1P2	-170	0.0362912	0.372	0.134009
KEAP1	chr6	10614170	+	24	GCAACGAAATCGGGAGATGGA	P1P2	-184	-0.423432	0.166667	0.0530547
KEAP1	chr6	10614180	+	24	GAGACATCCAGCAACGAAATC	P1P2	-194	-0.0819446	0.1	0.131839
KEAP1	chr6	10614203	+	25	GATGGTGGCGCGCAGCCCCGCG	P1P2	-217	-0.0475885	0.248	0.447336
KEAP1	chr6	10614237	+	25	GCCGGCGCTGTGCGTTGTTAAA	P1P2	-251	0.0972064	0.272	0.122387
KEAP1	chr6	10613306	-	24	GGCGCCCGTTTTCCTGGTCTC	P1P2	680	-0.0501659	0	0.0121048
KEAP1	chr6	10613441	-	22	GCCTCCATCGCTGCGCGTG	P1P2	545	-0.0139505	0	0.00869295
KEAP1	chr6	10613538	-	24	GGGCCCTGGCCTCAGGCGGTA	P1P2	448	1.05401	0	0.114179
KEAP1	chr6	10614139	-	23	GAGGAGTGGGGCATCGGGCG	P1P2	-153	0.0119101	0.0652174	0.0231678
KEAP1	chr6	10614273	-	25	GCACAGCGCCGGCCTCGTGGTC	P1P2	-287	0.0600799	0.22	0.0198313
KEAP1	chr6	10614283	-	25	GGCCTCGTGGTCCGGCGGCCGC	P1P2	-297	0.00776508	0.2	0.036818
KEAP1	chr6	10614290	-	23	GTCCGGCGGCCGCAGGATCT	P1P2	-304	0.104454	0.2	0.000543588
KEAP1	chr6	10614395	-	26	Gtctcgctctgatctgcacgccc	P1P2	-409	0.10308	0.719231	0.193313
KIF11	chr6	94353014	+	24	GGTCCCTCTCGGGCGCTGGCG	P1P2	84	-0.0109761	0	0.132481
KIF11	chr6	94353047	+	24	GGCTTGGCGGCCGACAGGGGC	P1P2	117	0.789347	0	0.0625668
KIF11	chr6	94353079	+	24	GCCGCGGACCTGGGCGCTGTG	P1P2	149	1.06181	0	0.0496258
KIF11	chr6	94353310	+	25	GAACGCGGAGAACCAAGAAACT	P1P2	380	0.435202	0.204	0.318779
KIF11	chr6	94353123	-	23	GCCGGGCCTTGATTTTTTGG	P1P2	193	0.0916222	0.0347826	0.49845
KIF11	chr6	94353214	-	24	GGTGGTGGTGAGATGCAGGTA	P1P2	284	1.05518	0.166667	0.0535238
KIF11	chr6	94353244	-	25	GCTGACAGGATTCCGAGCGCTG	P1P2	314	0.59058	1	0.384483
KIF11	chr1	94353257	-	24	GAGCGCTGCGGCTTCGCTGCT	P1P2	327	-0.0484203	1.14583	0.0365311
KIF11	chr1	94353272	-	24	GCTGCTGGGCCCCCTACTGCG	P1P2	342	0.883016	0.866667	0.755764
KIF11	chr1	94353279	-	23	GCCCCCTACTGCGCGGTCCA	P1P2	349	0.555117	0.665217	0.129367
KIF14	chr1	200589593	+	23	GACCGGGAAGCCGGACTTCA	P1P2	266	0.49509	1.6087	0.0359932
KIF14	chr1	200589709	+	24	GACCACTGCTCTGCGGGCGGG	P1P2	150	0.882947	0.283333	0.0756055
KIF14	chr1	200589734	+	24	GCGTGCGGACGCTTTCCCTAC	P1P2	125	1.31869	0.5875	0.0472763
KIF14	chr1	200589761	+	23	GGGGCGAAGTTTCGGCACTG	P1P2	98	0.0194712	2.08696	0.0738347
KIF14	chr1	200589812	+	23	GTGGCGTGGGGACTGTGTCG	P1P2	47	0.192066	0.586957	0.0196945
KIF14	chr1	200589844	+	24	GGCCTTCTGGGGAGCCGGCGC	P1P2	15	0.798365	0	0.00799836
KIF14	chr1	200589866	+	24	GCGGGGCGCCCATTCAAATTG	P1P2	-7	-0.00618492	0	0.135178
KIF14	chr1	200589605	-	24	GGGCCGAGAGGCCCTGAAGTC	P1P2	254	0.0337414	0.833333	0.0456639
KIF14	chr1	200589650	-	24	GCTGCCTTGCGCCCTTCGTTC	P1P2	209	0.203577	1.6625	0.0378816
KIF14	chr1	200589694	-	24	GGAATGCTGAGGAACTGAATG	P1P2	165	0.449504	0.266667	0.137332
KIF18A	chr1	28129554	+	24	GACTTGTATTATTGGGAACGG	P1P2	102	0.113389	1.60833	0.0931704
KIF18A	chr1	28129600	+	23	GAGGCACATGAAGGTAAAAC	P1P2	56	0.334782	0.417391	0.13187
KIF18A	chr1	28129643	+	23	GTGAAGTGGTTGCGGTAACC	P1P2	13	0.993844	0.147826	0.0225456
KIF18A	chr1	28129651	+	24	GACATTAAAGTGAAGTGGTTG	P1P2	5	0.755011	0.075	0.261055
KIF18A	chr1	28129657	+	24	GAGGCGGACATTAAAGTGAAG	P1P2	-1	0.961344	0.0333333	0.419714
KIF18A	chr1	28129699	+	24	GTGGCTTGGGTTTGAATATTG	P1P2	-43	1.04481	0	0.0361863
KIF18A	chr1	28129719	+	24	GAAACGAAGCGCTGAGGAAAG	P1P2	-63	0.177612	0.0458333	0.0785922
KIF18A	chr1	28129751	+	24	GACGTGATGACATCACGCGAG	P1P2	-95	-0.0149249	0.283333	0.679779
KIF18A	chr1	28129788	-	25	GTCATCACGTCGGACGCTGTCA	P1P2	-132	0.00927449	0.272	0.206863
KIF18A	chr1	28129795	-	24	GTCGGACGCTGTCACGGCTCG	P1P2	-139	0.274952	0.233333	0.168434
KIF23	chr1	69706606	+	24	GGCCAATCAGCGCCCGTCCGC	P1P2	-104	-0.033148	0.108333	0.069589
KIF23	chr12	69706658	+	22	GCGGCGACGCTAAGAGCCC	P1P2	-52	0.990442	0	0.0760527
KIF23	chr12	69706695	+	22	GAACTTCGCGGCTAAGGCG	P1P2	-15	0.757519	0.140909	0.900797
KIF23	chr12	69706734	+	22	GCGAAGACTGCGGGACGTT	P1P2	24	1.25064	0.377273	0.0389612
KIF23	chr12	69706755	+	23	GCGCATGCGGGACGGCTGGC	P1P2	45	-0.00503261	0.226087	0.0614799
KIF23	chr12	69706616	-	24	GGTCCTGCCTCTCCCTGCGGA	P1P2	-94	0.0337632	0.225	0.167483
KIF23	chr12	69706650	-	24	GCCCGTTTGAAATGCGCCAGG	P1P2	-60	0.0379508	0.1	0.499532
KIF23	chr12	69706792	-	23	GCATGCGCGTTTGGGCGGCG	P1P2	82	0.0367518	0.16087	0.408657
KIF23	chr12	69706839	-	23	GAGTACGAGGCCGCCGAGCA	P1P2	129	0.758914	0	0.0796186
KIF23	chr12	69706857	-	24	GCAGGGAGAGAGGGCGGACGG	P1P2	147	0.390898	0	0.0559993
KIF2C	chr12	45205600	+	23	GCGACGAGTCCATGGCCATT	P1P2	46	0.868946	2.43913	0.22144
KIF2C	chr1	45205608	+	24	GGGCCTGAAGCGACGAGTCCA	P1P2	54	1.02394	2.95417	0.0996546
KIF2C	chr1	45205641	+	24	GTTGGATCTTGATAGCGAGAC	P1P2	87	0.068816	2.3875	0.0426517
KIF2C	chr1	45205689	+	24	GCTCACGAGTCCCCTTGACCT	P1P2	135	0.968707	0.620833	0.105222
KIF2C	chr1	45205742	+	24	GTGAAAGCCCATCTGTGTGTC	P1P2	188	0.130695	2.37083	0.018499
KIF2C	chr1	45205464	-	24	GCTGACTGGCGGAAGCGAGGG	P1P2	-90	0.464328	0.1	0.17378
KIF2C	chr1	45205488	-	23	GACAGCGGAATGACGTTTTA	P1P2	-66	0.131635	0.134783	0.0660949
KIF2C	chr1	45205502	-	23	GTTTTAAGGACGCTTGCGCG	P1P2	-52	-0.0664035	0.243478	0.349786
KIF2C	chr1	45205519	-	23	GCGCGGGATTTAAACTGCGG	P1P2	-35	0.178172	0.286957	0.71459
KIF2C	chr1	45205702	-	24	GAGCGGGGTCCCTAGGTCAAG	P1P2	148	1.00736	0.866667	0.276229
LAMTOR4	chr1	99746670	+	24	GGTGGAGCGCAGGCCCACCAG	P1P2	95	0.538768	1.2625	0.111126
LAMTOR4	chr10	99746508	-	24	GCCAGTGGCGCAAGCAGAAGG	P1P2	-67	0.00988305	0.104167	0.441059
LAMTOR4	chr10	99746568	-	24	GCCGGAAGCTACCTATCTGGT	P1P2	-7	1.26671	0.0333333	0.166437
LAMTOR4	chr10	99746633	-	24	GCATGCGCGAGAGGACCCGCC	P1P2	58	0.0459036	0.0958333	0.365688
LAMTOR4	chr10	99746665	-	24	GTCTCTGCTCCCCAGTCTGTG	P1P2	90	0.994237	0.433333	0.377369
LAMTOR4	chr10	99746679	-	24	GTCTGTGTGGTTTCCCCCTGG	P1P2	104	0.427865	0.725	0.0318668
LAMTOR4	chr10	99746760	-	24	GAGGGATGGCGACGAGAATGC	P1P2	185	-0.0157459	0.404167	0.0531796
LAMTOR4	chr10	99746787	-	24	GGGGTCTGTGGGAGGGTGTTC	P1P2	212	0.116534	0.229167	0.00654777
LAMTOR4	chr10	99746812	-	24	GCTGCGGGTAGTCTGCAGGTC	P1P2	237	0.739058	0.2375	0.00962883
LAMTOR4	chr10	99746825	-	23	GCAGGTCGGGCGGAGACGAA	P1P2	250	0.525278	0.130435	0.238065
LAMTOR5	chr10	110950072	+	24	GACCCCCGGGACACGGGATGA	P1P2	183	0.280793	0.1	0.0120609
LAMTOR5	chr17	110950140	+	24	GAGGAACTTGAGCGGAACGAA	P1P2	115	0.479487	0.283333	0.279242
LAMTOR5	chr17	110950149	+	24	GTCGCGGCGGAGGAACTTGAG	P1P2	106	0.480536	0.225	0.195526
LAMTOR5	chr17	110950172	+	24	GCGCCTCTTCGGCCTGTCCTG	P1P2	83	0.524119	0.4	0.264017
LAMTOR5	chr17	110950184	+	23	GTGAGTAGTGCGCGCCTCTT	P1P2	71	0.620121	0.4	0.0501301
LAMTOR5	chr17	110950247	+	24	GTTCTGAGCCGGAGTGGTCGG	P1P2	8	0.889474	0.3	0.0827379
LAMTOR5	chr17	110950335	+	24	GTCCCTTTGGAGGCGCCGTTA	P1P2	-80	0.357859	0.254167	0.030542
LAMTOR5	chr17	110950231	-	23	GTCTTCCAAGTGCTGCTCCA	P1P2	24	1.4904	0.3	0.302461
LAMTOR5	chr17	110950326	-	24	GCCTCAGTCACTTGACGCGAG	P1P2	-71	0.125634	0.65	0.325023
LAMTOR5	chr17	110950343	-	21	GCGGGGCGTGGACCGTAA	P1P2	-88	0.510719	0.342857	0.368563
LOXL2	chr17	23261489	+	24	GTGGAGAGCGCGGTCCCAGCC	P1P2	136	0.0615699	0.254167	0.145438
LOXL2	chr17	23261509	+	23	GAAGCGGAGGGGGACCACCG	P1P2	116	1.10641	0.295652	0.25786
LOXL2	chr17	23261547	+	24	GCCGCCCCCTCTGCTCGAGAA	P1P2	78	-0.008247	0.308333	0.0289461
LOXL2	chr17	23261696	+	24	GGCGGCCGCCTTCGGGGAAGG	P1P2	-71	1.63512	0.1625	0.0692404
LOXL2	chr17	23261715	+	23	GGAGGCCGGGCCTGCTGCGG	P1P2	-90	0.258467	0.1	0.0191715
LOXL2	chr17	23261476	-	24	GAAGCGCTCTTACTTGGTTTC	P1P2	149	-0.0351348	0.391667	0.0102198
LOXL2	chr17	23261565	-	24	GAGCCCCTTTCTCGAGCAGAG	P1P2	60	0.0272132	0.4	0.176192
LOXL2	chr7	23261585	-	24	GGGGGCGGCTCTGGTCTCCGA	P1P2	40	-0.0361347	0.1	0.0989053
LOXL2	chr7	23261612	-	24	GAGAAAGCAAGCACCAAGCGT	P1P2	13	0.0499305	0	0.558414
LOXL2	chr7	23261798	-	24	GGGCCAGAGGGAGCTCCGCGG	P1P2	-173	0.0933395	0	0.0890087
MAD2L1BP	chr7	43603530	+	23	GAAGCCCGCGCCTCCACTTC	P1P2	-61	0.684186	0.1	0.0207845
MAD2L1BP	chr7	43603561	+	23	GTTAGAATAAAGGTCTCGCG	P1P2	-30	0.761531	0.121739	0.886843
MAD2L1BP	chr7	43603706	+	23	GAATGGATGGCGCGGCGGTA	P1P2	115	0.976022	2.13478	0.0637737
MAD2L1BP	chr7	43603723	+	24	GAGGACCAGCGGATAAACGAA	P1P2	132	0.972532	1.58333	0.592656
MAD2L1BP	chr7	43603748	+	24	GAAGACAGGGAAGACGGGCTA	P1P2	157	0.0262556	0.683333	0.0772694
MAD2L1BP	chr7	43603763	+	23	GTGTAGGACACCCGGAAGAC	P1P2	172	1.05145	0.16087	0.0437868
MAD2L1BP	chr7	43603590	-	24	GAGACCTTTATTCTAACCGCA	P1P2	-1	-0.114654	0.154167	0.776869
MAD2L1BP	chr7	43603627	-	23	GGTCGTGATGGCGGCGCCGG	P1P2	36	0.71389	0.134783	0.0509555
MAD2L1BP	chr7	43603668	-	24	GCCGCAGTCCCTGGTAAGGCG	P1P2	77	0.968835	0.3875	0.224569
MAD2L1BP	chr7	43603741	-	24	GCCATCCATTCGTTTATCCGC	P1P2	150	-0.062666	1.74583	0.182806
MARS2	chr7	198570104	+	22	GCAGACCGGCCGCAAGCGG	P1P2	-38	1.25871	0	0.116446
MARS2	chr7	198570127	+	24	GGAGGACGGACGTTCGCAGCA	P1P2	-15	0.839756	0.0375	0.190569
MARS2	chr7	198570149	+	24	GCCCCCGTGCGTCCTAGCAGG	P1P2	7	0.798531	0.295833	0.236545
MARS2	chr7	198570204	+	23	GAGCCCGAACTGTAGTAGCG	P1P2	62	0.11074	0.421739	0.371816
MARS2	chr7	198570235	+	24	GCACATCACAAGCATCATCGC	P1P2	93	0.0754262	1.58333	0.218441
MARS2	chr7	198570340	+	24	GGAGGCGACGGTGGCGGCATA	P1P2	198	0.52963	0.1	0.0649921
MARS2	chr7	198570347	+	24	GGACCTCGGAGGCGACGGTGG	P1P2	205	0.901535	0.1	0.229753
MARS2	chr11	198570116	-	24	GAACGCCGCCTCCTCCGCTTG	P1P2	-26	0.608542	0	0.055828
MARS2	chr11	198570310	-	23	GTGAACGCGGCGCCGCACAT	P1P2	168	0.0760818	0.0695652	0.12759
MARS2	chr11	198570324	-	23	GCACATCGGGCACCTGTACT	P1P2	182	0.223296	0	0.0711546
MARS	chr11	57881761	+	25	GTTCCGTATTAGGCCACTGCCC	P1P2	-110	-0.0238168	0.04	0.168085
[truncated: 16,381 more rows]
