# Supplementary material for: Nucleosomes impede Cas9 access to DNA in vivo and in vitro
Source: eLife. 2016 Mar 17;5:e12677. doi: 10.7554/eLife.12677 (PMC4861601; doi:10.7554/eLife.12677)
Supplement: Supplementary file 2. — Ricin tiling library sgRNA annotations, phenotype scores, and target site MNase signal, related to Figure 2. DOI: http://dx.doi.org/10.7554/eLife.12677.014 [file elife-12677-supp2.xlsx]

## Sheet: Table_S2.txt
gene symbol	chromosome	PAM genomic coordinate [hg19]	strand targeted	sgRNA length (including PAM)	sgRNA sequence	FANTOM 5 TSS [Where P1 and P2 are >1kb apart, TSSs were treated separately and sgRNAs assigned to the closest TSS; otherwise, P1P2 indicates all coordinates are related to the P1 TSS]	Position relative to FANTOM5 TSS	Cas9 nuclease phenotype-signed z-score	Target site MNase signal	Doench et al. Nat. Biotech 2014 sgRNA sequence score	is targeting CDS?
ARCN1	chr11	118438372	-	25	GAAAACCTACCAGAGGTAAACA	P1P2	-4774	-0.817426	0.164	0.127736	FALSE
ARCN1	chr11	118438477	-	24	GATCTGTTTTGCTCGtaatag	P1P2	-4669	0.356962	1.1125	0.0187624	FALSE
ARCN1	chr11	118438477	-	26	GTGATCTGTTTTGCTCGtaatag	P1P2	-4669	-1.00496	1.09615	0.0187624	FALSE
ARCN1	chr11	118438507	-	26	gtaatgtgcagtacttactatgt	P1P2	-4639	1.38345	0.392308	0.193313	FALSE
ARCN1	chr11	118438681	-	27	gcgctgaaaatagcagccaaacac	P1P2	-4465	1.23336	1.61111	0.193313	FALSE
ARCN1	chr11	118438762	-	26	GACTCCTCAAGAAGCATGCTTAC	P1P2	-4384	0.150797	1.18077	0.0352152	FALSE
ARCN1	chr11	118438762	-	27	GGACTCCTCAAGAAGCATGCTTAC	P1P2	-4384	0.509685	1.17037	0.0352152	FALSE
ARCN1	chr11	118438762	-	28	GGGACTCCTCAAGAAGCATGCTTAC	P1P2	-4384	-0.0180343	1.15714	0.0352152	FALSE
ARCN1	chr11	118438763	-	27	GACTCCTCAAGAAGCATGCTTACA	P1P2	-4383	-0.0124466	1.19259	0.242598	FALSE
ARCN1	chr11	118438763	-	28	GGACTCCTCAAGAAGCATGCTTACA	P1P2	-4383	-1.06049	1.18214	0.242598	FALSE
ARCN1	chr11	118438781	-	28	GCTTACAGGGTTGCTTTTTCTTCTG	P1P2	-4365	-0.944688	1.56071	0.0877855	FALSE
ARCN1	chr11	118438857	-	25	GCTGAGCTTCTGAGATCCAAGT	P1P2	-4289	0.00830459	1.872	0.567878	FALSE
ARCN1	chr11	118438870	-	25	GATCCAAGTTGGAAGCCCTGGA	P1P2	-4276	1.33211	1.296	0.260637	FALSE
ARCN1	chr11	118438870	-	27	GAGATCCAAGTTGGAAGCCCTGGA	P1P2	-4276	-0.295956	1.34074	0.260637	FALSE
ARCN1	chr11	118438883	-	24	GCCCTGGAAGGTGCTACAATA	P1P2	-4263	0.667144	0.929167	0.0596626	FALSE
ARCN1	chr11	118438883	-	27	GAAGCCCTGGAAGGTGCTACAATA	P1P2	-4263	0.260998	0.959259	0.0596626	FALSE
ARCN1	chr11	118438883	-	28	GGAAGCCCTGGAAGGTGCTACAATA	P1P2	-4263	-0.225735	0.971429	0.0596626	FALSE
ARCN1	chr11	118438982	-	27	GCTTTTTGTAACAAAAATTAAAAT	P1P2	-4164	-1.87035	0.803704	0.195557	FALSE
ARCN1	chr11	118438983	-	28	GCTTTTTGTAACAAAAATTAAAATT	P1P2	-4163	-1.59219	0.814286	0.0704526	FALSE
ARCN1	chr11	118439714	-	27	GTGTCAATTAGaaaatttaaaaat	P1P2	-3432	-1.22341	0.3	0.11675	FALSE
ARCN1	chr11	118440254	-	26	GCTTTCTAAAGATTTCTATTAGA	P1P2	-2892	-1.61115	0.557692	0.0715605	FALSE
ARCN1	chr11	118440254	-	28	GAGCTTTCTAAAGATTTCTATTAGA	P1P2	-2892	-3.1242	0.539286	0.0715605	FALSE
ARCN1	chr11	118440278	-	25	GCCATTGGAGATGGAATTGATA	P1P2	-2868	1.7329	1.12	0.0892784	FALSE
ARCN1	chr11	118440278	-	26	GGCCATTGGAGATGGAATTGATA	P1P2	-2868	0.168829	1.11154	0.0892784	FALSE
ARCN1	chr11	118440279	-	26	GCCATTGGAGATGGAATTGATAC	P1P2	-2867	0.210929	1.11538	0.130267	FALSE
ARCN1	chr11	118440279	-	27	GGCCATTGGAGATGGAATTGATAC	P1P2	-2867	1.63058	1.10741	0.130267	FALSE
ARCN1	chr11	118440313	-	25	GAAGTCtataatgcagtgctta	P1P2	-2833	1.54072	1.048	0.264371	FALSE
ARCN1	chr11	118440314	-	26	GAAGTCtataatgcagtgcttaa	P1P2	-2832	0.240206	1.06154	0.107373	FALSE
ARCN1	chr11	118440458	-	28	gagacaataaaggtacctatctcag	P1P2	-2688	0.0813967	2.35714	0.193313	FALSE
ARCN1	chr11	118440507	-	28	gataatctgtgtgaagttagagtaa	P1P2	-2639	-0.387812	0.803571	0.193313	FALSE
ARCN1	chr11	118440511	-	24	gtgtgaagttagagtaatggc	P1P2	-2635	-1.00374	0.8125	0.193313	FALSE
ARCN1	chr11	118440551	-	28	gttcaataaatgttagGGAACACAC	P1P2	-2595	0.845112	0.85	0.316316	FALSE
ARCN1	chr11	118440562	-	28	gttagGGAACACACAGGAGATACAG	P1P2	-2584	-1.61036	0.7	0.751069	FALSE
ARCN1	chr11	118440578	-	26	GATACAGAGGCAGTGTGTTTTAA	P1P2	-2568	-0.361255	0.780769	0.0519755	FALSE
ARCN1	chr11	118440578	-	28	GAGATACAGAGGCAGTGTGTTTTAA	P1P2	-2568	-0.735297	0.771428	0.0519755	FALSE
ARCN1	chr11	118441098	-	28	gccaggagaaaactgactttgaact	P1P2	-2048	-0.267538	1.56429	0.193313	FALSE
ARCN1	chr11	118441292	-	26	GTTTAATATGGATGAGTGCTGTT	P1P2	-1854	-0.657245	0.838462	0.143616	FALSE
ARCN1	chr11	118441292	-	27	GGTTTAATATGGATGAGTGCTGTT	P1P2	-1854	-0.884417	0.855556	0.143616	FALSE
ARCN1	chr11	118441303	-	24	GAGTGCTGTTCGGTTGAGCTA	P1P2	-1843	1.51227	0.633333	0.315124	FALSE
ARCN1	chr11	118441303	-	27	GATGAGTGCTGTTCGGTTGAGCTA	P1P2	-1843	-2.74856	0.655556	0.315124	FALSE
ARCN1	chr11	118441303	-	28	GGATGAGTGCTGTTCGGTTGAGCTA	P1P2	-1843	0.603591	0.664286	0.315124	FALSE
ARCN1	chr11	118441310	-	24	GTTCGGTTGAGCTAAGGATGT	P1P2	-1836	-0.660291	0.6125	0.0370422	FALSE
ARCN1	chr11	118441310	-	27	GCTGTTCGGTTGAGCTAAGGATGT	P1P2	-1836	0.0956384	0.622222	0.0370422	FALSE
ARCN1	chr11	118441326	-	24	GATGTAGGATAAAATGATTTA	P1P2	-1820	0.528013	0.8375	0.0537548	FALSE
ARCN1	chr11	118441326	-	25	GGATGTAGGATAAAATGATTTA	P1P2	-1820	0.466405	0.828	0.0537548	FALSE
ARCN1	chr11	118441370	-	28	GCTATACTCTGAAAAATCTGAAATT	P1P2	-1776	-1.23422	1.23929	0.0460425	FALSE
ARCN1	chr11	118441434	-	23	gtcttggttccatcatatac	P1P2	-1712	1.35994	0.621739	0.193313	FALSE
ARCN1	chr11	118441434	-	25	gagtcttggttccatcatatac	P1P2	-1712	-0.308652	0.632	0.193313	FALSE
ARCN1	chr11	118441666	-	25	gtctaagtctcacaatttgcac	P1P2	-1480	0.0781122	2.332	0.193313	FALSE
ARCN1	chr11	118441666	-	27	gagtctaagtctcacaatttgcac	P1P2	-1480	0.442146	2.25926	0.193313	FALSE
ARCN1	chr11	118441888	-	27	gtctctgtggattttcttctattc	P1P2	-1258	-0.936488	0.640741	0.193313	FALSE
ARCN1	chr11	118442151	-	25	gttgacatatattcagttctcc	P1P2	-995	2.09946	1.064	0.193313	FALSE
ARCN1	chr11	118442151	-	27	gtgttgacatatattcagttctcc	P1P2	-995	0.096779	1.08148	0.193313	FALSE
ARCN1	chr11	118442152	-	28	gtgttgacatatattcagttctcct	P1P2	-994	0.170762	1.08571	0.193313	FALSE
ARCN1	chr11	118442317	-	23	gtgaaatgacgtctcaccac	P1P2	-829	-0.198578	0.626087	0.193313	FALSE
ARCN1	chr11	118442317	-	25	gtgtgaaatgacgtctcaccac	P1P2	-829	-0.213374	0.692	0.193313	FALSE
ARCN1	chr11	118442317	-	27	gagtgtgaaatgacgtctcaccac	P1P2	-829	0.909137	0.759259	0.193313	FALSE
ARCN1	chr11	118442477	-	26	GCAGATGAAgcccatttttagac	P1P2	-669	-1.11878	0.684615	0.300646	FALSE
ARCN1	chr11	118442528	-	28	gctgagttataagagttcttaggcc	P1P2	-618	-0.992194	0.446429	0.193313	FALSE
ARCN1	chr11	118442533	-	28	gttataagagttcttaggccaggcg	P1P2	-613	-0.360279	0.492857	0.193313	FALSE
ARCN1	chr11	118442862	-	25	gatactggtcttttaGGCAcac	P1P2	-284	1.27843	0.044	0.182598	FALSE
ARCN1	chr11	118442862	-	26	ggatactggtcttttaGGCAcac	P1P2	-284	-0.176521	0.0423077	0.182598	FALSE
ARCN1	chr11	118442888	-	27	gttatcctgtatattaaataatag	P1P2	-258	-0.814261	0.281482	0.193313	FALSE
ARCN1	chr11	118442888	-	28	ggttatcctgtatattaaataatag	P1P2	-258	-1.50355	0.278571	0.193313	FALSE
ARCN1	chr11	118442939	-	24	gatgtgacgcaaaATAAATGA	P1P2	-207	0.706958	2.06667	0.102651	FALSE
ARCN1	chr11	118442939	-	28	gtaagatgtgacgcaaaATAAATGA	P1P2	-207	-0.847869	1.97143	0.102651	FALSE
ARCN1	chr11	118442957	-	23	GAAGGCGATGACAGTGAAAG	P1P2	-189	0.212141	3.81739	0.324387	FALSE
ARCN1	chr11	118442969	-	26	GACAGTGAAAGGGGAGAGATACG	P1P2	-177	0.821038	5.15769	0.324945	FALSE
ARCN1	chr11	118442981	-	25	GAGAGATACGAGGTTCCACAGC	P1P2	-165	0.134958	4.94	0.0614774	FALSE
ARCN1	chr11	118442981	-	26	GGAGAGATACGAGGTTCCACAGC	P1P2	-165	0.977232	4.96538	0.0614774	FALSE
ARCN1	chr11	118442981	-	27	GGGAGAGATACGAGGTTCCACAGC	P1P2	-165	1.03493	4.98148	0.0614774	FALSE
ARCN1	chr11	118442981	-	28	GGGGAGAGATACGAGGTTCCACAGC	P1P2	-165	-0.0600129	4.99286	0.0614774	FALSE
ARCN1	chr11	118442984	-	28	GAGAGATACGAGGTTCCACAGCTGG	P1P2	-162	0.512278	4.65	0.334038	FALSE
ARCN1	chr11	118442985	-	25	GATACGAGGTTCCACAGCTGGA	P1P2	-161	2.39613	4.348	0.547942	FALSE
ARCN1	chr11	118442985	-	27	GAGATACGAGGTTCCACAGCTGGA	P1P2	-161	5.0296	4.46667	0.547942	FALSE
ARCN1	chr11	118443008	-	26	GGGTGAACGCCCCCTACACCTCC	P1P2	-138	1.53713	0.876923	0.0298382	FALSE
ARCN1	chr11	118443008	-	28	GAGGGTGAACGCCCCCTACACCTCC	P1P2	-138	-0.0157452	1	0.0298382	FALSE
ARCN1	chr11	118443009	-	23	GAACGCCCCCTACACCTCCT	P1P2	-137	1.01407	0.656522	0.134201	FALSE
ARCN1	chr11	118443009	-	25	GTGAACGCCCCCTACACCTCCT	P1P2	-137	1.21004	0.748	0.134201	FALSE
ARCN1	chr11	118443009	-	26	GGTGAACGCCCCCTACACCTCCT	P1P2	-137	0.245564	0.796154	0.134201	FALSE
ARCN1	chr11	118443009	-	27	GGGTGAACGCCCCCTACACCTCCT	P1P2	-137	0.060278	0.848148	0.134201	FALSE
ARCN1	chr11	118443029	-	22	GGCTTAATCGTAACCGGAG	P1P2	-117	-3.09183	0.0409091	0.280285	FALSE
ARCN1	chr11	118443029	-	23	GGGCTTAATCGTAACCGGAG	P1P2	-117	0.321384	0.0478261	0.280285	FALSE
ARCN1	chr11	118443030	-	23	GGCTTAATCGTAACCGGAGC	P1P2	-116	0.764376	0.0391304	0.0765215	FALSE
ARCN1	chr11	118443030	-	24	GGGCTTAATCGTAACCGGAGC	P1P2	-116	0.170327	0.0458333	0.0765215	FALSE
ARCN1	chr11	118443031	-	24	GGCTTAATCGTAACCGGAGCG	P1P2	-115	0.0402914	0.0375	0.798076	FALSE
ARCN1	chr11	118443031	-	25	GGGCTTAATCGTAACCGGAGCG	P1P2	-115	-1.10968	0.044	0.798076	FALSE
ARCN1	chr11	118443057	-	27	GTACCCTCAATTTCCCCAGCCCAC	P1P2	-89	-0.0280705	0	0.244	FALSE
ARCN1	chr11	118443057	-	28	GGTACCCTCAATTTCCCCAGCCCAC	P1P2	-89	0.642452	0	0.244	FALSE
ARCN1	chr11	118443098	-	25	gcccTTTGACCTGCGCCGCTTC	P1P2	-48	0.0722874	0	0.0979401	FALSE
ARCN1	chr11	118443110	-	23	GCCGCTTCCGGTTGAAGACG	P1P2	-36	-1.65922	0	0.197592	FALSE
ARCN1	chr11	118443110	-	25	GCGCCGCTTCCGGTTGAAGACG	P1P2	-36	1.63839	0	0.197592	FALSE
ARCN1	chr11	118443115	-	25	GCTTCCGGTTGAAGACGTGGCT	P1P2	-31	0.771148	0	0.032413	FALSE
ARCN1	chr11	118443115	-	28	GCCGCTTCCGGTTGAAGACGTGGCT	P1P2	-31	1.20928	0	0.032413	FALSE
ARCN1	chr11	118443117	-	27	GCTTCCGGTTGAAGACGTGGCTTG	P1P2	-29	0.982385	0	0.0677718	FALSE
ARCN1	chr11	118443129	-	26	GACGTGGCTTGGGGCCGCCATCT	P1P2	-17	2.4631	0	0.000591062	FALSE
ARCN1	chr11	118443136	-	27	GCTTGGGGCCGCCATCTTGGCAAG	P1P2	-10	0.607498	0	0.143597	FALSE
ARCN1	chr11	118443136	-	28	GGCTTGGGGCCGCCATCTTGGCAAG	P1P2	-10	1.04884	0	0.143597	FALSE
ARCN1	chr11	118443144	-	25	GCCATCTTGGCAAGAGGCGAAG	P1P2	-2	3.02095	0	0.611668	FALSE
ARCN1	chr11	118443144	-	28	GCCGCCATCTTGGCAAGAGGCGAAG	P1P2	-2	3.92462	0	0.611668	FALSE
ARCN1	chr11	118443162	-	25	GAAGCGGCAGCGGTTCCTGTCA	P1P2	16	0.308287	0	0.00594475	FALSE
ARCN1	chr11	118443162	-	27	GCGAAGCGGCAGCGGTTCCTGTCA	P1P2	16	1.44042	0	0.00594475	FALSE
ARCN1	chr11	118443162	-	28	GGCGAAGCGGCAGCGGTTCCTGTCA	P1P2	16	1.05103	0	0.00594475	FALSE
ARCN1	chr11	118443163	-	23	GCGGCAGCGGTTCCTGTCAA	P1P2	17	0.709368	0	0.0999659	FALSE
ARCN1	chr11	118443163	-	26	GAAGCGGCAGCGGTTCCTGTCAA	P1P2	17	2.29701	0	0.0999659	FALSE
ARCN1	chr11	118443163	-	28	GCGAAGCGGCAGCGGTTCCTGTCAA	P1P2	17	0.795995	0	0.0999659	FALSE
ARCN1	chr11	118443164	-	24	GCGGCAGCGGTTCCTGTCAAG	P1P2	18	-1.07041	0	0.0438615	FALSE
ARCN1	chr11	118443164	-	27	GAAGCGGCAGCGGTTCCTGTCAAG	P1P2	18	1.26409	0	0.0438615	FALSE
ARCN1	chr11	118443165	-	25	GCGGCAGCGGTTCCTGTCAAGG	P1P2	19	1.71037	0	0.251872	FALSE
ARCN1	chr11	118443165	-	28	GAAGCGGCAGCGGTTCCTGTCAAGG	P1P2	19	0.599716	0	0.251872	FALSE
ARCN1	chr11	118443172	-	26	GCGGTTCCTGTCAAGGGGGCAGC	P1P2	26	-0.963437	0	0.111938	FALSE
ARCN1	chr11	118443265	-	26	GCGCCCCACCACCGCCCTCACCA	P1P2	119	2.52078	1.18846	0.207119	TRUE
ARCN1	chr11	118443265	-	28	GCGCGCCCCACCACCGCCCTCACCA	P1P2	119	1.62346	1.20357	0.207119	TRUE
ARCN1	chr11	118443295	-	27	GATCCGAGCCAGGACCCGAACTCC	P1P2	149	-0.966509	0.155556	0.00236946	FALSE
ARCN1	chr11	118443296	-	28	GATCCGAGCCAGGACCCGAACTCCT	P1P2	150	-1.00342	0.15	0.166167	FALSE
ARCN1	chr11	118443297	-	24	GAGCCAGGACCCGAACTCCTG	P1P2	151	0.263798	0.1	0.132309	FALSE
ARCN1	chr11	118443325	-	23	GCCTCACCGTCTCTCCTTGT	P1P2	179	-1.01654	0.0478261	0.197847	FALSE
ARCN1	chr11	118443325	-	25	GAGCCTCACCGTCTCTCCTTGT	P1P2	179	0.869033	0.044	0.197847	FALSE
ARCN1	chr11	118443328	-	26	GCCTCACCGTCTCTCCTTGTCGG	P1P2	182	0.859406	0.0653846	0.400103	FALSE
ARCN1	chr11	118443328	-	28	GAGCCTCACCGTCTCTCCTTGTCGG	P1P2	182	-1.26207	0.0607143	0.400103	FALSE
ARCN1	chr11	118443329	-	27	GCCTCACCGTCTCTCCTTGTCGGC	P1P2	183	2.3815	0.0703704	0.262117	FALSE
ARCN1	chr11	118443334	-	24	GTCTCTCCTTGTCGGCGGGCC	P1P2	188	1.0835	0.133333	0.00906929	FALSE
ARCN1	chr11	118443335	-	25	GTCTCTCCTTGTCGGCGGGCCT	P1P2	189	0.204374	0.14	0.0196644	FALSE
ARCN1	chr11	118443336	-	26	GTCTCTCCTTGTCGGCGGGCCTG	P1P2	190	1.27192	0.146154	0.0527318	FALSE
ARCN1	chr11	118443364	-	26	GGGGCCGGAGGAGCCCCGCCCTG	P1P2	218	0.445511	0.138462	0.0696466	FALSE
ARCN1	chr11	118443365	-	25	GGCCGGAGGAGCCCCGCCCTGA	P1P2	219	-0.406595	0.12	0.0753194	FALSE
ARCN1	chr11	118443365	-	27	GGGGCCGGAGGAGCCCCGCCCTGA	P1P2	219	-1.42568	0.133333	0.0753194	FALSE
ARCN1	chr11	118443371	-	24	GGAGCCCCGCCCTGAGGGTCT	P1P2	225	1.09683	0.0583333	0.00385065	FALSE
ARCN1	chr11	118443371	-	26	GAGGAGCCCCGCCCTGAGGGTCT	P1P2	225	-1.81091	0.0692308	0.00385065	FALSE
ARCN1	chr11	118443371	-	27	GGAGGAGCCCCGCCCTGAGGGTCT	P1P2	225	-1.25613	0.0740741	0.00385065	FALSE
ARCN1	chr11	118443372	-	24	GAGCCCCGCCCTGAGGGTCTA	P1P2	226	-0.323255	0.05	0.0871295	FALSE
ARCN1	chr11	118443372	-	25	GGAGCCCCGCCCTGAGGGTCTA	P1P2	226	1.18976	0.056	0.0871295	FALSE
ARCN1	chr11	118443372	-	27	GAGGAGCCCCGCCCTGAGGGTCTA	P1P2	226	0.268463	0.0666667	0.0871295	FALSE
ARCN1	chr11	118443372	-	28	GGAGGAGCCCCGCCCTGAGGGTCTA	P1P2	226	-0.0514248	0.0714286	0.0871295	FALSE
ARCN1	chr11	118443391	-	27	GTCTAGGGCAGAGTGCTTTTGCTC	P1P2	245	1.09013	0.0407407	0.0533169	FALSE
ARCN1	chr11	118443391	-	28	GGTCTAGGGCAGAGTGCTTTTGCTC	P1P2	245	-0.115871	0.0392857	0.0533169	FALSE
ARCN1	chr11	118443392	-	28	GTCTAGGGCAGAGTGCTTTTGCTCC	P1P2	246	0.660472	0.0464286	0.0272917	FALSE
ARCN1	chr11	118443397	-	26	GCAGAGTGCTTTTGCTCCGGGCT	P1P2	251	-0.744643	0.0884615	0.0352883	FALSE
ARCN1	chr11	118443397	-	27	GGCAGAGTGCTTTTGCTCCGGGCT	P1P2	251	-0.816118	0.0851852	0.0352883	FALSE
ARCN1	chr11	118443397	-	28	GGGCAGAGTGCTTTTGCTCCGGGCT	P1P2	251	-0.920214	0.0821429	0.0352883	FALSE
ARCN1	chr11	118443398	-	22	GTGCTTTTGCTCCGGGCTC	P1P2	252	-1.66554	0.113636	0.0106524	FALSE
ARCN1	chr11	118443398	-	24	GAGTGCTTTTGCTCCGGGCTC	P1P2	252	-0.636241	0.104167	0.0106524	FALSE
ARCN1	chr11	118443398	-	27	GCAGAGTGCTTTTGCTCCGGGCTC	P1P2	252	-0.305731	0.0925926	0.0106524	FALSE
ARCN1	chr11	118443398	-	28	GGCAGAGTGCTTTTGCTCCGGGCTC	P1P2	252	-1.76303	0.0892857	0.0106524	FALSE
ARCN1	chr11	118443399	-	23	GTGCTTTTGCTCCGGGCTCG	P1P2	253	0.379376	0.117391	0.0865993	FALSE
ARCN1	chr11	118443399	-	25	GAGTGCTTTTGCTCCGGGCTCG	P1P2	253	1.05818	0.108	0.0865993	FALSE
ARCN1	chr11	118443399	-	28	GCAGAGTGCTTTTGCTCCGGGCTCG	P1P2	253	-0.105643	0.0964286	0.0865993	FALSE
ARCN1	chr11	118443423	-	25	GAGCAGTGTGGCCTCCTGTGCC	P1P2	277	0.156517	0.18	0.0694404	FALSE
ARCN1	chr11	118443423	-	26	GGAGCAGTGTGGCCTCCTGTGCC	P1P2	277	-0.631837	0.180769	0.0694404	FALSE
ARCN1	chr11	118443423	-	27	GGGAGCAGTGTGGCCTCCTGTGCC	P1P2	277	0.314585	0.181481	0.0694404	FALSE
ARCN1	chr11	118443423	-	28	GGGGAGCAGTGTGGCCTCCTGTGCC	P1P2	277	0.512772	0.182143	0.0694404	FALSE
ARCN1	chr11	118443431	-	26	GTGGCCTCCTGTGCCCGGTCTCC	P1P2	285	-0.639292	0.215385	0.00400859	FALSE
ARCN1	chr11	118443431	-	28	GTGTGGCCTCCTGTGCCCGGTCTCC	P1P2	285	-0.823537	0.214286	0.00400859	FALSE
ARCN1	chr11	118443442	-	25	GCCCGGTCTCCTGGAGATCCGA	P1P2	296	0.31694	0.38	0.143612	FALSE
ARCN1	chr11	118443442	-	27	GTGCCCGGTCTCCTGGAGATCCGA	P1P2	296	0.846231	0.359259	0.143612	FALSE
ARCN1	chr11	118443536	-	27	GTTTGCTGGGACCTGCCCCTGAGA	P1P2	390	0.60762	0.155556	0.297411	FALSE
ARCN1	chr11	118443541	-	23	GACCTGCCCCTGAGACGGCC	P1P2	395	0.55901	0.134783	0.147756	FALSE
ARCN1	chr11	118443541	-	24	GGACCTGCCCCTGAGACGGCC	P1P2	395	0.177959	0.1375	0.147756	FALSE
ARCN1	chr11	118443541	-	25	GGGACCTGCCCCTGAGACGGCC	P1P2	395	-1.11664	0.14	0.147756	FALSE
ARCN1	chr11	118443541	-	28	GCTGGGACCTGCCCCTGAGACGGCC	P1P2	395	-1.99886	0.146429	0.147756	FALSE
ARCN1	chr11	118443568	-	26	GTTTTTGCTCTGCGAGAACTTCG	P1P2	422	-1.93135	0.173077	0.265782	FALSE
ARCN1	chr11	118443568	-	28	GCGTTTTTGCTCTGCGAGAACTTCG	P1P2	422	0.496029	0.175	0.265782	FALSE
ARCN1	chr11	118443571	-	23	GCTCTGCGAGAACTTCGTGG	P1P2	425	0.881227	0.169565	0.880081	FALSE
ARCN1	chr11	118443574	-	26	GCTCTGCGAGAACTTCGTGGTGG	P1P2	428	0.447684	0.173077	0.0862238	FALSE
ARCN1	chr11	118443579	-	26	GCGAGAACTTCGTGGTGGTGGTG	P1P2	433	1.69577	0.180769	0.0639504	FALSE
ARCN1	chr11	118443580	-	25	GAGAACTTCGTGGTGGTGGTGC	P1P2	434	2.27042	0.184	0.0575118	FALSE
ARCN1	chr11	118443580	-	27	GCGAGAACTTCGTGGTGGTGGTGC	P1P2	434	-0.695256	0.185185	0.0575118	FALSE
ARCN1	chr11	118443593	-	26	GTGGTGGTGCGGGTCCCAGGCTG	P1P2	447	-0.938605	0.426923	0.0174966	FALSE
ARCN1	chr11	118443593	-	27	GGTGGTGGTGCGGGTCCCAGGCTG	P1P2	447	0.418129	0.418518	0.0174966	FALSE
ARCN1	chr11	118443600	-	23	GGGTCCCAGGCTGCGGACCT	P1P2	454	-2.62357	0.717391	0.0325889	FALSE
ARCN1	chr11	118443600	-	25	GCGGGTCCCAGGCTGCGGACCT	P1P2	454	-2.87112	0.676	0.0325889	FALSE
ARCN1	chr11	118443600	-	27	GTGCGGGTCCCAGGCTGCGGACCT	P1P2	454	0.0597569	0.640741	0.0325889	FALSE
ARCN1	chr11	118443600	-	28	GGTGCGGGTCCCAGGCTGCGGACCT	P1P2	454	-0.861863	0.625	0.0325889	FALSE
ARCN1	chr11	118443620	-	28	GACCTCGGAACTGATGCTGTCCCGC	P1P2	474	0.802014	0.917857	0.304521	FALSE
ARCN1	chr11	118443628	-	24	GATGCTGTCCCGCCGGTTCCC	P1P2	482	-0.204501	0.683333	0.0650215	FALSE
ARCN1	chr11	118443636	-	26	GTCCCGCCGGTTCCCTGGCGCTT	P1P2	490	-1.22591	0.523077	0.0071978	FALSE
ARCN1	chr11	118443645	-	26	GTTCCCTGGCGCTTAGGCTCAGC	P1P2	499	0.994529	0.411538	0.0265428	FALSE
ARCN1	chr11	118443645	-	27	GGTTCCCTGGCGCTTAGGCTCAGC	P1P2	499	0.234729	0.418518	0.0265428	FALSE
ARCN1	chr11	118443650	-	24	GGCGCTTAGGCTCAGCAGGCT	P1P2	504	0.216385	0.4	0.0217864	FALSE
ARCN1	chr11	118443661	-	26	GCTCAGCAGGCTGGGCCTGTCTC	P1P2	515	-2.80275	0.4	0.0467342	FALSE
ARCN1	chr11	118443661	-	27	GGCTCAGCAGGCTGGGCCTGTCTC	P1P2	515	0.649624	0.4	0.0467342	FALSE
ARCN1	chr11	118443670	-	26	GCTGGGCCTGTCTCCGGAGGTTC	P1P2	524	0.302534	0.373077	0.0364876	FALSE
ARCN1	chr11	118443670	-	27	GGCTGGGCCTGTCTCCGGAGGTTC	P1P2	524	-1.02457	0.374074	0.0364876	FALSE
ARCN1	chr11	118443717	-	26	GTCTCCCACCCCCGGTGTTTGCT	P1P2	571	-0.687646	0.634615	0.018651	FALSE
ARCN1	chr11	118443748	-	26	GATAACTCGAAATGCAAATCCAC	P1P2	602	1.45414	2.27308	0.0791146	FALSE
ARCN1	chr11	118443779	-	25	GAAATTTTTCTTTTTGTTCAGA	P1P2	633	-1.59191	1.784	0.0157866	FALSE
ARCN1	chr11	118443780	-	26	GAAATTTTTCTTTTTGTTCAGAA	P1P2	634	-2.66787	1.74231	0.12428	FALSE
ARCN1	chr11	118443781	-	27	GAAATTTTTCTTTTTGTTCAGAAG	P1P2	635	-1.44532	1.7037	0.0629317	FALSE
ARCN1	chr11	118443782	-	28	GAAATTTTTCTTTTTGTTCAGAAGG	P1P2	636	-0.916897	1.66786	0.158593	FALSE
ARCN1	chr11	118443806	-	25	GAAATGGAGACACAGAGCGGAA	P1P2	660	0.118332	0.64	0.238569	FALSE
ARCN1	chr11	118443806	-	26	GGAAATGGAGACACAGAGCGGAA	P1P2	660	-0.142186	0.642308	0.238569	FALSE
ARCN1	chr11	118443806	-	27	GGGAAATGGAGACACAGAGCGGAA	P1P2	660	-0.0229118	0.644444	0.238569	FALSE
ARCN1	chr11	118443806	-	28	GGGGAAATGGAGACACAGAGCGGAA	P1P2	660	-1.02185	0.65	0.238569	FALSE
ARCN1	chr11	118443832	-	25	GTAACTTCTAACACTAATGTAT	P1P2	686	0.709629	0.336	0.0638475	FALSE
ARCN1	chr11	118443832	-	27	GAGTAACTTCTAACACTAATGTAT	P1P2	686	0.284264	0.348148	0.0638475	FALSE
ARCN1	chr11	118443832	-	28	GGAGTAACTTCTAACACTAATGTAT	P1P2	686	0.375383	0.357143	0.0638475	FALSE
ARCN1	chr11	118443903	-	25	GTGTCCATTTGTTAGTGTGACT	P1P2	757	0.952532	1.988	0.11271	FALSE
ARCN1	chr11	118443904	-	24	GTCCATTTGTTAGTGTGACTC	P1P2	758	0.871118	2.15	0.00685402	FALSE
ARCN1	chr11	118443904	-	26	GTGTCCATTTGTTAGTGTGACTC	P1P2	758	1.1314	2.04231	0.00685402	FALSE
ARCN1	chr11	118443905	-	25	GTCCATTTGTTAGTGTGACTCG	P1P2	759	1.12472	2.204	0.279655	FALSE
ARCN1	chr11	118443905	-	27	GTGTCCATTTGTTAGTGTGACTCG	P1P2	759	0.381418	2.0963	0.279655	FALSE
ARCN1	chr11	118443929	-	25	GTACATACACTGTGTAGACCAC	P1P2	783	-0.00773618	3.132	0.150243	FALSE
ARCN1	chr11	118443929	-	26	GGTACATACACTGTGTAGACCAC	P1P2	783	0.352907	3.14231	0.150243	FALSE
ARCN1	chr11	118443929	-	27	GGGTACATACACTGTGTAGACCAC	P1P2	783	1.11544	3.15185	0.150243	FALSE
ARCN1	chr11	118443929	-	28	GGGGTACATACACTGTGTAGACCAC	P1P2	783	-0.84189	3.15714	0.150243	FALSE
ARCN1	chr11	118443930	-	26	GTACATACACTGTGTAGACCACT	P1P2	784	0.887756	3.1	0.192905	FALSE
ARCN1	chr11	118443930	-	27	GGTACATACACTGTGTAGACCACT	P1P2	784	0.562631	3.11111	0.192905	FALSE
ARCN1	chr11	118443930	-	28	GGGTACATACACTGTGTAGACCACT	P1P2	784	0.0613038	3.12143	0.192905	FALSE
ARCN1	chr11	118443944	-	24	GACCACTGGGAAAATGTGAGC	P1P2	798	-0.18467	2.14583	0.0429539	FALSE
ARCN1	chr11	118443944	-	27	GTAGACCACTGGGAAAATGTGAGC	P1P2	798	0.175129	2.25185	0.0429539	FALSE
ARCN1	chr11	118443960	-	23	GAGCAGGTTCCAGAGAACAC	P1P2	814	1.18518	1.42174	0.218018	FALSE
ARCN1	chr11	118443960	-	25	GTGAGCAGGTTCCAGAGAACAC	P1P2	814	-2.81068	1.46	0.218018	FALSE
ARCN1	chr11	118443961	-	26	GTGAGCAGGTTCCAGAGAACACA	P1P2	815	-0.24866	1.46154	0.516557	FALSE
ARCN1	chr11	118443989	-	25	GCCTTCAAGGAACTTATTGTCC	P1P2	843	1.11077	1.708	0.0569546	FALSE
ARCN1	chr11	118444010	-	28	GTCCAGGTGAAGAAAAATGTGTATG	P1P2	864	0.0645723	1.22857	0.0614592	FALSE
ARCN1	chr11	118444036	-	23	GTCGTAGTCAGATGTCTCAC	P1P2	890	1.07566	0.504348	0.124473	FALSE
ARCN1	chr11	118444036	-	27	GCATGTCGTAGTCAGATGTCTCAC	P1P2	890	0.483074	0.518519	0.124473	FALSE
ARCN1	chr11	118444036	-	28	GGCATGTCGTAGTCAGATGTCTCAC	P1P2	890	1.58365	0.525	0.124473	FALSE
ARCN1	chr11	118444039	-	26	GTCGTAGTCAGATGTCTCACAGG	P1P2	893	-0.0806967	0.526923	0.464394	FALSE
ARCN1	chr11	118444042	-	26	GTAGTCAGATGTCTCACAGGAGG	P1P2	896	-1.00003	0.553846	0.104715	FALSE
ARCN1	chr11	118444051	-	25	GTCTCACAGGAGGTGGAGTAAG	P1P2	905	1.56344	0.68	0.0759128	FALSE
ARCN1	chr11	118444051	-	28	GATGTCTCACAGGAGGTGGAGTAAG	P1P2	905	-0.66183	0.660714	0.0759128	FALSE
ARCN1	chr11	118444052	-	26	GTCTCACAGGAGGTGGAGTAAGA	P1P2	906	0.62333	0.684615	0.425336	FALSE
ARCN1	chr11	118444141	-	28	GTTACAAGGATGAGAAAGGTTAATG	P1P2	995	-4.23527	1.05357	0.0619338	FALSE
ARCN1	chr11	118444147	-	26	GATGAGAAAGGTTAATGTGGTTG	P1P2	1001	1.48297	1.00385	0.0710689	FALSE
ARCN1	chr11	118444147	-	27	GGATGAGAAAGGTTAATGTGGTTG	P1P2	1001	0.547952	1.00741	0.0710689	FALSE
ARCN1	chr11	118444151	-	27	GAGAAAGGTTAATGTGGTTGAGGA	P1P2	1005	0.339076	0.944445	0.078064	FALSE
ARCN1	chr11	118444154	-	28	GAAAGGTTAATGTGGTTGAGGATGG	P1P2	1008	-0.0713405	0.896429	0.122452	FALSE
ARCN1	chr11	118444393	-	25	GAGATGGCAGAATGTAATTTGG	P1P2	1247	-1.17599	0.268	0.465038	TRUE
ARCN1	chr11	118444393	-	27	GAGAGATGGCAGAATGTAATTTGG	P1P2	1247	0.644227	0.274074	0.465038	TRUE
ARCN1	chr11	118444438	-	25	GACAACCCTTTAGATAAGAACT	P1P2	1292	-2.22658	1.212	0.0559055	TRUE
ARCN1	chr11	118444520	-	24	GGTATATAAATTGCATCAAAC	P1P2	1374	-0.17913	1.06667	0.345067	FALSE
ARCN1	chr11	118444546	-	27	GTTTGCCTCCTAAAATTTTTGTGT	P1P2	1400	-1.70981	0.803704	0.0868454	FALSE
ARCN1	chr11	118444546	-	28	GGTTTGCCTCCTAAAATTTTTGTGT	P1P2	1400	-1.15411	0.814286	0.0868454	FALSE
ARCN1	chr11	118444587	-	27	GAAACTTGTATTTTCAGTTTCTCC	P1P2	1441	-1.84191	0.959259	0.0180508	FALSE
ARCN1	chr11	118444602	-	26	GTTTCTCCAGGAGGTTCTGTATT	P1P2	1456	2.44465	0.942308	0.0458597	FALSE
ARCN1	chr11	118444640	-	27	GAAACTCAGTTCCCGTTTACACCC	P1P2	1494		0.611111	0.169362	FALSE
ARCN1	chr11	118444718	-	28	GTCTTGTATTATATAAACCAGATAA	P1P2	1572	-0.626729	0.0107143	0.216425	FALSE
ARCN1	chr11	118444790	-	27	GTATTTTTAATTCATTGATAACTG	P1P2	1644	-1.9203	0.118519	0.151501	FALSE
ARCN1	chr11	118444791	-	28	GTATTTTTAATTCATTGATAACTGA	P1P2	1645	-2.1135	0.117857	0.552129	FALSE
ARCN1	chr11	118444894	-	26	GTGTCACATATTTCTGAATTATT	P1P2	1748	-0.242155	1.02692	0.00803877	FALSE
ARCN1	chr11	118444895	-	25	GTCACATATTTCTGAATTATTT	P1P2	1749	0.292855	1.068	0.0173015	FALSE
ARCN1	chr11	118444895	-	27	GTGTCACATATTTCTGAATTATTT	P1P2	1749	-0.226318	1.04815	0.0173015	FALSE
ARCN1	chr11	118444936	-	26	GATACCCACAGATTTGTGTACTC	P1P2	1790	-1.29218	1.20385	0.0505298	FALSE
ARCN1	chr11	118444986	-	25	GCTCTGTAGAGTGTTAAGACAT	P1P2	1840	-1.0274	1.212	0.280608	FALSE
ARCN1	chr11	118445011	-	27	GGTATGATTTCTGTGTAATGTTTT	P1P2	1865	-0.300043	0.877778	0.00699047	FALSE
ARCN1	chr11	118445012	-	27	GTATGATTTCTGTGTAATGTTTTT	P1P2	1866	0.618615	0.866667	0.12268	FALSE
ARCN1	chr11	118445012	-	28	GGTATGATTTCTGTGTAATGTTTTT	P1P2	1866	-0.797598	0.871429	0.12268	FALSE
ARCN1	chr11	118445062	-	23	GACAGTAGAAATGTCCAGAT	P1P2	1916	-0.740254	1.6	0.118086	FALSE
ARCN1	chr11	118445062	-	24	GGACAGTAGAAATGTCCAGAT	P1P2	1916	-1.12217	1.59167	0.118086	FALSE
ARCN1	chr11	118445063	-	24	GACAGTAGAAATGTCCAGATA	P1P2	1917	0.435142	1.5875	0.157057	FALSE
ARCN1	chr11	118445063	-	25	GGACAGTAGAAATGTCCAGATA	P1P2	1917	0.793585	1.58	0.157057	FALSE
ARCN1	chr11	118446031	-	26	GTATCTTTTTAATTGTGTTTTGA	P1P2	2885	2.19219	1.45	0.0279172	FALSE
ARCN1	chr11	118446125	-	27	GAAGTTCACTGCAGAAACTGATAA	P1P2	2979		1.0037	0.360344	FALSE
ARCN1	chr11	118446126	-	25	GTTCACTGCAGAAACTGATAAC	P1P2	2980		0.976	0.313396	FALSE
ARCN1	chr11	118446126	-	28	GAAGTTCACTGCAGAAACTGATAAC	P1P2	2980		1	0.313396	FALSE
ARCN1	chr11	118446237	-	26	GAGTAAATTACTTTTCAAGTTTT	P1P2	3091	-1.83108	0.619231	0.0108051	FALSE
ARCN1	chr11	118446401	-	28	GCATGTATATGTGTATAAAATATTG	P1P2	3255	-1.27879	1.76429	0.363436	FALSE
ARCN1	chr11	118446444	-	26	GGTGACTATAATTCTGGAAGTAA	P1P2	3298	-1.09969	1.59231	0.136693	FALSE
ARCN1	chr11	118446591	-	27	GTTATGGTTAGACAATTTGCCTTC	P1P2	3445	0.445483	0.933333	0.0786946	FALSE
ARCN1	chr11	118446628	-	28	GTTACTATAAAATATTGTTCCAAAG	P1P2	3482	-1.50557	1.06071	0.324456	FALSE
ARCN1	chr11	118446657	-	26	GAACTGGAGCAGTGGGTATAAAA	P1P2	3511	-0.259388	0.688462	0.139682	FALSE
ARCN1	chr11	118446762	-	27	gaactttaaagacacagagcactt	P1P2	3616	-1.69174	1.33704	0.193313	FALSE
ARCN1	chr11	118446793	-	24	gtaaactaacctcctatgtta	P1P2	3647	0.755287	0.591667	0.193313	FALSE
ARCN1	chr11	118446849	-	23	ggtcacataattagtggcaa	P1P2	3703	1.76697	1.2913	0.193313	FALSE
ARCN1	chr11	118446874	-	23	gaacagaaacctaattctcc	P1P2	3728	-0.273213	1.28261	0.206284	FALSE
ARCN1	chr11	118446874	-	26	gcagaacagaaacctaattctcc	P1P2	3728	0.347213	1.25	0.206284	FALSE
ARCN1	chr11	118446874	-	27	ggcagaacagaaacctaattctcc	P1P2	3728	-1.05273	1.24074	0.206284	FALSE
ARCN1	chr11	118447010	-	26	GTTTGGCAAAGCTCAACTTTATG	P1P2	3864	-0.0385094	0.757692	0.0642661	FALSE
ARCN1	chr11	118447011	-	27	GTTTGGCAAAGCTCAACTTTATGA	P1P2	3865	0.691938	0.755556	0.529804	FALSE
ARCN1	chr11	118447058	-	27	GTcctggagagatcatctaactta	P1P2	3912	-0.339309	0.592593	0.193313	FALSE
ARCN1	chr11	118447059	-	28	GTcctggagagatcatctaacttat	P1P2	3913	-1.4667	0.603571	0.193313	FALSE
ARCN1	chr11	118447092	-	27	gttttcacatctgtaagacaatca	P1P2	3946	1.75954	0.511111	0.169515	FALSE
ARCN1	chr11	118447093	-	28	gttttcacatctgtaagacaatcaa	P1P2	3947	0.566027	0.510714	0.193313	FALSE
ARCN1	chr11	118447119	-	27	gCTCTTGCAAGTTCCTTTTAGATC	P1P2	3973	-0.909813	0.707407	0.0172274	FALSE
ARCN1	chr11	118447119	-	28	ggCTCTTGCAAGTTCCTTTTAGATC	P1P2	3973	-2.44576	0.7	0.0172274	FALSE
ARCN1	chr11	118447228	-	25	GAAAATCAGATCAAATTTCAAT	P1P2	4082	-1.12033	0.144	0.0613303	FALSE
ARCN1	chr11	118447228	-	27	GAGAAAATCAGATCAAATTTCAAT	P1P2	4082	0.265455	0.155556	0.0613303	FALSE
ARCN1	chr11	118447229	-	26	GAAAATCAGATCAAATTTCAATA	P1P2	4083	0.980888	0.138462	0.44982	FALSE
ARCN1	chr11	118447229	-	28	GAGAAAATCAGATCAAATTTCAATA	P1P2	4083	-1.09132	0.15	0.44982	FALSE
ARCN1	chr11	118447352	-	26	GAAGACAAATGTTAATTTAGGAT	P1P2	4206	0.497649	0.0884615	0.111495	FALSE
ARCN1	chr11	118447374	-	28	GATAGGATAAATTTATCATGTTTAG	P1P2	4228	-0.0244172	0.992857	0.170291	FALSE
ARCN1	chr11	118447434	-	24	GAGAGACCTGTGTCAACTGCC	P1P2	4288	0.0517786	1.30417	0.203604	FALSE
ARCN1	chr11	118447458	-	25	GAACCTGTAATTTGTGGTGTCC	P1P2	4312	0.0327405	1.68	0.00336945	FALSE
ARCN1	chr11	118447458	-	26	GGAACCTGTAATTTGTGGTGTCC	P1P2	4312	0.341934	1.67308	0.00336945	FALSE
ARCN1	chr11	118447459	-	26	GAACCTGTAATTTGTGGTGTCCT	P1P2	4313	-0.299419	1.66923	0.0424944	FALSE
ARCN1	chr11	118447459	-	27	GGAACCTGTAATTTGTGGTGTCCT	P1P2	4313	0.931826	1.66296	0.0424944	FALSE
ARCN1	chr11	118447466	-	27	GTAATTTGTGGTGTCCTGGGTGTT	P1P2	4320	0.937375	1.62593	0.038625	FALSE
ARCN1	chr11	118447490	-	23	GATTTATGCTATACTTAGTA	P1P2	4344	-4.93098	2.5	0.0511258	FALSE
ARCN1	chr11	118447490	-	25	GAGATTTATGCTATACTTAGTA	P1P2	4344	-0.330988	2.428	0.0511258	FALSE
ARCN1	chr11	118447490	-	26	GGAGATTTATGCTATACTTAGTA	P1P2	4344	-1.60581	2.39231	0.0511258	FALSE
ARCN1	chr11	118447491	-	24	GATTTATGCTATACTTAGTAT	P1P2	4345	0.624737	2.50417	0.100874	FALSE
ARCN1	chr11	118447491	-	26	GAGATTTATGCTATACTTAGTAT	P1P2	4345	-0.400802	2.43462	0.100874	FALSE
ARCN1	chr11	118447491	-	27	GGAGATTTATGCTATACTTAGTAT	P1P2	4345	-2.54862	2.4	0.100874	FALSE
ARCN1	chr11	118447492	-	25	GATTTATGCTATACTTAGTATG	P1P2	4346	0.214166	2.508	0.349562	FALSE
ARCN1	chr11	118447492	-	27	GAGATTTATGCTATACTTAGTATG	P1P2	4346	0.580399	2.44074	0.349562	FALSE
ARCN1	chr11	118447492	-	28	GGAGATTTATGCTATACTTAGTATG	P1P2	4346	-0.200057	2.40714	0.349562	FALSE
ARCN1	chr11	118447500	-	26	GCTATACTTAGTATGGGGAACTA	P1P2	4354	-1.52338	2.51538	0.304609	FALSE
ARCN1	chr11	118447511	-	23	GGGGAACTATGGTCCTATTT	P1P2	4365	-0.807694	1.7087	0.0670292	FALSE
ARCN1	chr11	118447511	-	27	GTATGGGGAACTATGGTCCTATTT	P1P2	4365	-0.462844	1.88148	0.0670292	FALSE
ARCN1	chr11	118447535	-	25	GAAGCCTTGTTTTGCTTGTATC	P1P2	4389	1.5075	0.796	0.0160534	FALSE
ARCN1	chr11	118447535	-	26	GGAAGCCTTGTTTTGCTTGTATC	P1P2	4389	0.504905	0.796154	0.0160534	FALSE
ARCN1	chr11	118447542	-	24	GTTTTGCTTGTATCTGGATAA	P1P2	4396	-0.21778	0.766667	0.0778834	FALSE
ARCN1	chr11	118447618	-	26	GACGTACTGAAAGCCTGGAATTC	P1P2	4472	0.370574	1.24231	0.0119384	FALSE
ARCN1	chr11	118447623	-	28	GTACTGAAAGCCTGGAATTCTggcc	P1P2	4477	-1.62231	1.3	0.458752	FALSE
ARCN1	chr11	118447628	-	28	GAAAGCCTGGAATTCTggccaggtg	P1P2	4482	-1.93636	1.40714	0.193148	FALSE
ARCN1	chr11	118447631	-	27	GCCTGGAATTCTggccaggtgtgg	P1P2	4485	-1.75962	1.5	0.400674	FALSE
ARCN1	chr11	118438353	+	27	GCACTTTCCTTGTTTACCTCTGGT	P1P2	-4793	0.257488	0.240741	0.409793	FALSE
ARCN1	chr11	118438353	+	28	GGCACTTTCCTTGTTTACCTCTGGT	P1P2	-4793	-0.562326	0.25	0.409793	FALSE
ARCN1	chr11	118438565	+	28	gattggcagtaacatctatctcata	P1P2	-4581	0.694579	1.24643	0.193313	FALSE
ARCN1	chr11	118438712	+	28	GTCCCATAGTGGcagtatcttataa	P1P2	-4434	-0.566546	0.767857	0.502836	FALSE
ARCN1	chr11	118438728	+	28	GCATGCTTCTTGAGGAGTCCCATAG	P1P2	-4418	-0.997859	1.01429	0.248969	FALSE
ARCN1	chr11	118438741	+	27	GCAACCCTGTAAGCATGCTTCTTG	P1P2	-4405	0.386895	1.30741	0.0432546	FALSE
ARCN1	chr11	118438795	+	24	GCTGCTTCTTCGGAAATATAA	P1P2	-4351	-0.452239	2.94167	0.436213	FALSE
ARCN1	chr11	118438795	+	27	GATGCTGCTTCTTCGGAAATATAA	P1P2	-4351	0.736131	2.91481	0.436213	FALSE
ARCN1	chr11	118438849	+	25	GCACCTTCCAGGGCTTCCAACT	P1P2	-4297	-0.458134	1.172	0.0452397	FALSE
ARCN1	chr11	118438849	+	28	GTAGCACCTTCCAGGGCTTCCAACT	P1P2	-4297	-0.0327498	1.13571	0.0452397	FALSE
ARCN1	chr11	118438861	+	24	GCCTTATTGTAGCACCTTCCA	P1P2	-4285	0.994624	0.879167	0.494577	FALSE
ARCN1	chr11	118438862	+	23	GCCTTATTGTAGCACCTTCC	P1P2	-4284	0.0844462	0.869565	0.0306838	FALSE
ARCN1	chr11	118438934	+	24	GCAGACATATTTTAAGAAACA	P1P2	-4212	-1.72089	0.5	0.0834881	FALSE
ARCN1	chr11	118439354	+	28	GTGACaatgggtacaaactttcttt	P1P2	-3792	-0.0962193	0.221429	0.106352	FALSE
ARCN1	chr11	118439668	+	25	GACACATAATACTTGTACCCAC	P1P2	-3478	0.444194	0.5	0.369753	FALSE
ARCN1	chr11	118440321	+	28	gattcaaacaaaggctgttcaactt	P1P2	-2825	-0.872758	1.03214	0.193313	FALSE
ARCN1	chr11	118440335	+	27	gtaggtaagcgaggattcaaacaa	P1P2	-2811	0.228569	0.903704	0.193313	FALSE
ARCN1	chr11	118440369	+	28	gaaaactatcccaccacaggtctca	P1P2	-2777	-1.57445	1.14643	0.193313	FALSE
ARCN1	chr11	118440377	+	23	gaagaaaactatcccaccac	P1P2	-2769	-2.08058	1.25217	0.193313	FALSE
ARCN1	chr11	118440377	+	25	gagaagaaaactatcccaccac	P1P2	-2769	-0.762683	1.272	0.193313	FALSE
ARCN1	chr11	118441062	+	26	gtcagttttctcctggctgggcg	P1P2	-2084	-1.28031	2.00385	0.193313	FALSE
ARCN1	chr11	118441067	+	28	gttcaaagtcagttttctcctggct	P1P2	-2079	-0.539719	1.71786	0.193313	FALSE
ARCN1	chr11	118441068	+	27	gttcaaagtcagttttctcctggc	P1P2	-2078	-0.494833	1.69259	0.193313	FALSE
ARCN1	chr11	118441072	+	28	gccaagttcaaagtcagttttctcc	P1P2	-2074	-1.84042	1.46429	0.193313	FALSE
ARCN1	chr11	118441779	+	27	gttaattagtgtaagatttatttc	P1P2	-1367	-2.08768	1.72593	0.193313	FALSE
ARCN1	chr11	118441820	+	27	gatttccaggggctcaggaagggt	P1P2	-1326	0.505708	1.59259	0.193313	FALSE
ARCN1	chr11	118442262	+	25	ggatggctatcataataattgt	P1P2	-884	0.703464	2.548	0.193313	FALSE
ARCN1	chr11	118442285	+	28	ggtgagacgtcatttcacactcact	P1P2	-861	-2.26831	1.02143	0.193313	FALSE
ARCN1	chr11	118442326	+	28	gaaatgttgaatatccttagggaaa	P1P2	-820	0.70041	0.378571	0.193313	FALSE
ARCN1	chr11	118442867	+	28	gcacagccactattatttaatatac	P1P2	-279	0.00262793	0.353571	0.193313	FALSE
ARCN1	chr11	118442972	+	24	GGGGCGTTCACCCTCCAGCTG	P1P2	-174	0.302648	2.24167	0.141111	FALSE
ARCN1	chr11	118442972	+	25	GGGGGCGTTCACCCTCCAGCTG	P1P2	-174	0.479487	2.176	0.141111	FALSE
ARCN1	chr11	118442972	+	28	GTAGGGGGCGTTCACCCTCCAGCTG	P1P2	-174	-1.23662	2	0.141111	FALSE
ARCN1	chr11	118442992	+	25	GATTAAGCCCAGGAGGTGTAGG	P1P2	-154	-0.631982	0.328	0.594231	FALSE
ARCN1	chr11	118442993	+	24	GATTAAGCCCAGGAGGTGTAG	P1P2	-153	-0.173763	0.304167	0.361855	FALSE
ARCN1	chr11	118442994	+	28	GTTACGATTAAGCCCAGGAGGTGTA	P1P2	-152	-1.50601	0.232143	0.151032	FALSE
ARCN1	chr11	118442995	+	27	GTTACGATTAAGCCCAGGAGGTGT	P1P2	-151	0.145971	0.211111	0.093922	FALSE
ARCN1	chr11	118442995	+	28	GGTTACGATTAAGCCCAGGAGGTGT	P1P2	-151	-1.04527	0.203571	0.093922	FALSE
ARCN1	chr11	118443001	+	27	GCTCCGGTTACGATTAAGCCCAGG	P1P2	-145	1.13841	0.0888889	0.50691	FALSE
ARCN1	chr11	118443004	+	24	GCTCCGGTTACGATTAAGCCC	P1P2	-142	1.59504	0.0625	0.490664	FALSE
ARCN1	chr11	118443021	+	24	GAAATTGAGGGTACCCCGCTC	P1P2	-125	2.04793	0	0.0271445	FALSE
ARCN1	chr11	118443021	+	25	GGAAATTGAGGGTACCCCGCTC	P1P2	-125	-0.0539459	0	0.0271445	FALSE
ARCN1	chr11	118443021	+	26	GGGAAATTGAGGGTACCCCGCTC	P1P2	-125	-0.289442	0	0.0271445	FALSE
ARCN1	chr11	118443021	+	27	GGGGAAATTGAGGGTACCCCGCTC	P1P2	-125	1.21355	0	0.0271445	FALSE
ARCN1	chr11	118443034	+	27	gggccTGTGGGCTGGGGAAATTGA	P1P2	-112	1.02867	0	0.626555	FALSE
ARCN1	chr11	118443034	+	28	ggggccTGTGGGCTGGGGAAATTGA	P1P2	-112	0.212318	0	0.626555	FALSE
ARCN1	chr11	118443035	+	25	ggccTGTGGGCTGGGGAAATTG	P1P2	-111	-0.0636864	0	0.118868	FALSE
ARCN1	chr11	118443035	+	26	gggccTGTGGGCTGGGGAAATTG	P1P2	-111	1.68662	0	0.118868	FALSE
ARCN1	chr11	118443035	+	27	ggggccTGTGGGCTGGGGAAATTG	P1P2	-111	0.42297	0	0.118868	FALSE
ARCN1	chr11	118443069	+	24	GCGGCGCAGGTCAAAgggcgg	P1P2	-77	0.771167	0	0.156489	FALSE
ARCN1	chr11	118443069	+	27	GAAGCGGCGCAGGTCAAAgggcgg	P1P2	-77	-1.33489	0	0.156489	FALSE
ARCN1	chr11	118443069	+	28	GGAAGCGGCGCAGGTCAAAgggcgg	P1P2	-77	0.103582	0	0.156489	FALSE
ARCN1	chr11	118443070	+	26	GAAGCGGCGCAGGTCAAAgggcg	P1P2	-76	0.867452	0	0.301856	FALSE
ARCN1	chr11	118443070	+	27	GGAAGCGGCGCAGGTCAAAgggcg	P1P2	-76	0.46141	0	0.301856	FALSE
ARCN1	chr11	118443071	+	25	GAAGCGGCGCAGGTCAAAgggc	P1P2	-75	0.733671	0	0.382305	FALSE
ARCN1	chr11	118443071	+	26	GGAAGCGGCGCAGGTCAAAgggc	P1P2	-75	0.0704348	0	0.382305	FALSE
ARCN1	chr11	118443072	+	24	GAAGCGGCGCAGGTCAAAggg	P1P2	-74	0.363149	0	0.52999	FALSE
ARCN1	chr11	118443072	+	25	GGAAGCGGCGCAGGTCAAAggg	P1P2	-74	0.331388	0	0.52999	FALSE
ARCN1	chr11	118443095	+	24	GCCCCAAGCCACGTCTTCAAC	P1P2	-51	0.577745	0	0.287392	FALSE
ARCN1	chr11	118443095	+	25	GGCCCCAAGCCACGTCTTCAAC	P1P2	-51	1.44626	0	0.287392	FALSE
ARCN1	chr11	118443095	+	27	GCGGCCCCAAGCCACGTCTTCAAC	P1P2	-51	1.8709	0	0.287392	FALSE
ARCN1	chr11	118443095	+	28	GGCGGCCCCAAGCCACGTCTTCAAC	P1P2	-51	2.51761	0	0.287392	FALSE
ARCN1	chr11	118443118	+	25	GCTTCGCCTCTTGCCAAGATGG	P1P2	-28	3.85103	0	0.363934	FALSE
ARCN1	chr11	118443118	+	28	GCCGCTTCGCCTCTTGCCAAGATGG	P1P2	-28	3.4952	0	0.363934	FALSE
ARCN1	chr11	118443121	+	25	GCCGCTTCGCCTCTTGCCAAGA	P1P2	-25	0.417217	0	0.0215066	FALSE
ARCN1	chr11	118443121	+	28	GCTGCCGCTTCGCCTCTTGCCAAGA	P1P2	-25	0.100644	0	0.0215066	FALSE
ARCN1	chr11	118443153	+	28	GCTCTGGACCTGCTGCCCCCTTGAC	P1P2	7	1.51538	0.0107143	0.0870707	FALSE
ARCN1	chr11	118443174	+	26	GGGAACGGGAGCACCAGCAGCTC	P1P2	28	1.06865	0.165385	0.0175886	FALSE
ARCN1	chr11	118443174	+	27	GGGGAACGGGAGCACCAGCAGCTC	P1P2	28	2.5696	0.174074	0.0175886	FALSE
ARCN1	chr11	118443191	+	26	GATAGGGGTAGGGTCTGGGGAAC	P1P2	45	0.0567355	0.438462	0.000710249	FALSE
ARCN1	chr11	118443191	+	27	GGATAGGGGTAGGGTCTGGGGAAC	P1P2	45	0.668615	0.448148	0.000710249	FALSE
ARCN1	chr11	118443191	+	28	GGGATAGGGGTAGGGTCTGGGGAAC	P1P2	45	0.143761	0.457143	0.000710249	FALSE
ARCN1	chr11	118443192	+	26	GGATAGGGGTAGGGTCTGGGGAA	P1P2	46	-1.90519	0.457692	0.0407593	FALSE
ARCN1	chr11	118443192	+	27	GGGATAGGGGTAGGGTCTGGGGAA	P1P2	46	0.23236	0.466667	0.0407593	FALSE
ARCN1	chr11	118443192	+	28	GGGGATAGGGGTAGGGTCTGGGGAA	P1P2	46	0.486951	0.478571	0.0407593	FALSE
ARCN1	chr11	118443209	+	27	GCACTCCGGCTCCACTGGGGATAG	P1P2	63	-0.256259	0.896296	0.055377	FALSE
ARCN1	chr11	118443210	+	26	GCACTCCGGCTCCACTGGGGATA	P1P2	64	0.779747	0.911538	0.0118954	FALSE
ARCN1	chr11	118443216	+	24	GCCCGCACTCCGGCTCCACTG	P1P2	70	-2.21748	1.075	0.23745	FALSE
ARCN1	chr11	118443216	+	26	GCGCCCGCACTCCGGCTCCACTG	P1P2	70	0.944994	1.10769	0.23745	FALSE
ARCN1	chr11	118443216	+	28	GCGCGCCCGCACTCCGGCTCCACTG	P1P2	70	-1.0989	1.13571	0.23745	FALSE
ARCN1	chr11	118443217	+	25	GCGCCCGCACTCCGGCTCCACT	P1P2	71	0.364542	1.124	0.194348	FALSE
ARCN1	chr11	118443217	+	27	GCGCGCCCGCACTCCGGCTCCACT	P1P2	71	0.282125	1.15185	0.194348	FALSE
ARCN1	chr11	118443217	+	28	GGCGCGCCCGCACTCCGGCTCCACT	P1P2	71	0.728488	1.16429	0.194348	FALSE
ARCN1	chr11	118443218	+	24	GCGCCCGCACTCCGGCTCCAC	P1P2	72	0.451018	1.14167	0.00443622	FALSE
ARCN1	chr11	118443218	+	26	GCGCGCCCGCACTCCGGCTCCAC	P1P2	72	0.519336	1.16923	0.00443622	FALSE
ARCN1	chr11	118443218	+	27	GGCGCGCCCGCACTCCGGCTCCAC	P1P2	72	-0.803054	1.18148	0.00443622	FALSE
ARCN1	chr11	118443218	+	28	GGGCGCGCCCGCACTCCGGCTCCAC	P1P2	72	0.852992	1.19286	0.00443622	FALSE
ARCN1	chr11	118443227	+	25	GTGGTGGGGCGCGCCCGCACTC	P1P2	81	1.84819	1.352	0.166026	FALSE
ARCN1	chr11	118443227	+	26	GGTGGTGGGGCGCGCCCGCACTC	P1P2	81	1.66362	1.34615	0.166026	FALSE
ARCN1	chr11	118443227	+	28	GCGGTGGTGGGGCGCGCCCGCACTC	P1P2	81	0.801203	1.33571	0.166026	FALSE
ARCN1	chr11	118443245	+	28	GATCTTACCATGGTGAGGGCGGTGG	P1P2	99	1.15631	0.903571	0.085617	FALSE
ARCN1	chr11	118443248	+	25	GATCTTACCATGGTGAGGGCGG	P1P2	102	1.25053	0.84	0.151024	FALSE
ARCN1	chr11	118443248	+	26	GGATCTTACCATGGTGAGGGCGG	P1P2	102	2.1583	0.819231	0.151024	FALSE
ARCN1	chr11	118443251	+	27	GCTCGGATCTTACCATGGTGAGGG	P1P2	105	2.95758	0.666667	0.358427	FALSE
ARCN1	chr11	118443251	+	28	GGCTCGGATCTTACCATGGTGAGGG	P1P2	105	1.49296	0.65	0.358427	FALSE
ARCN1	chr11	118443254	+	24	GCTCGGATCTTACCATGGTGA	P1P2	108	6.81867	0.595833	0.352206	FALSE
ARCN1	chr11	118443254	+	25	GGCTCGGATCTTACCATGGTGA	P1P2	108	2.79085	0.58	0.352206	FALSE
ARCN1	chr11	118443255	+	23	GCTCGGATCTTACCATGGTG	P1P2	109	2.02762	0.569565	0.421637	FALSE
ARCN1	chr11	118443255	+	24	GGCTCGGATCTTACCATGGTG	P1P2	109	0.654245	0.554167	0.421637	FALSE
ARCN1	chr11	118443260	+	24	GTCCTGGCTCGGATCTTACCA	P1P2	114	-1.52517	0.370833	0.574491	FALSE
ARCN1	chr11	118443260	+	25	GGTCCTGGCTCGGATCTTACCA	P1P2	114	1.46293	0.36	0.574491	FALSE
ARCN1	chr11	118443260	+	26	GGGTCCTGGCTCGGATCTTACCA	P1P2	114	-0.273022	0.35	0.574491	FALSE
ARCN1	chr11	118443272	+	28	GACCCCAGGAGTTCGGGTCCTGGCT	P1P2	126	-2.02355	0.0964286	0.0869292	FALSE
ARCN1	chr11	118443277	+	28	GCTCGGACCCCAGGAGTTCGGGTCC	P1P2	131	-1.32569	0.0535714	0.00226464	FALSE
ARCN1	chr11	118443283	+	25	GAGGCTCGGACCCCAGGAGTTC	P1P2	137	-0.899739	0.024	0.0273284	FALSE
ARCN1	chr11	118443283	+	27	GTGAGGCTCGGACCCCAGGAGTTC	P1P2	137	-1.65172	0.0222222	0.0273284	FALSE
ARCN1	chr11	118443283	+	28	GGTGAGGCTCGGACCCCAGGAGTTC	P1P2	137	-1.48581	0.0214286	0.0273284	FALSE
ARCN1	chr11	118443284	+	24	GAGGCTCGGACCCCAGGAGTT	P1P2	138	-0.342912	0.0208333	0.0217358	FALSE
ARCN1	chr11	118443284	+	26	GTGAGGCTCGGACCCCAGGAGTT	P1P2	138	-4.12215	0.0192308	0.0217358	FALSE
ARCN1	chr11	118443284	+	27	GGTGAGGCTCGGACCCCAGGAGTT	P1P2	138	0.198735	0.0185185	0.0217358	FALSE
ARCN1	chr11	118443291	+	27	GAGAGACGGTGAGGCTCGGACCCC	P1P2	145	0.646426	0.00740741	0.0182953	FALSE
ARCN1	chr11	118443291	+	28	GGAGAGACGGTGAGGCTCGGACCCC	P1P2	145	-0.945826	0.0107143	0.0182953	FALSE
ARCN1	chr11	118443299	+	25	GACAAGGAGAGACGGTGAGGCT	P1P2	153	0.539418	0.036	0.0958345	FALSE
ARCN1	chr11	118443299	+	28	GCCGACAAGGAGAGACGGTGAGGCT	P1P2	153	0.463311	0.0535714	0.0958345	FALSE
ARCN1	chr11	118443304	+	23	GCCGACAAGGAGAGACGGTG	P1P2	158	1.32441	0.0652174	0.199494	FALSE
ARCN1	chr11	118443304	+	27	GCCCGCCGACAAGGAGAGACGGTG	P1P2	158	-1.40107	0.0851852	0.199494	FALSE
ARCN1	chr11	118443304	+	28	GGCCCGCCGACAAGGAGAGACGGTG	P1P2	158	0.169015	0.0928571	0.199494	FALSE
ARCN1	chr11	118443317	+	27	GCCCCTGCCCCAGGCCCGCCGACA	P1P2	171	1.75575	0.218519	0.00838774	FALSE
ARCN1	chr11	118443317	+	28	GGCCCCTGCCCCAGGCCCGCCGACA	P1P2	171	1.79879	0.217857	0.00838774	FALSE
ARCN1	chr11	118443330	+	28	GCGGGGCTCCTCCGGCCCCTGCCCC	P1P2	184	-0.196337	0.210714	0.0430853	FALSE
ARCN1	chr11	118443354	+	27	GCACTCTGCCCTAGACCCTCAGGG	P1P2	208	0.317975	0.0148148	0.799684	FALSE
ARCN1	chr11	118443388	+	26	GAGGCCACACTGCTCCCCGAGCC	P1P2	242	-2.0151	0.192308	0.0677534	FALSE
ARCN1	chr11	118443388	+	27	GGAGGCCACACTGCTCCCCGAGCC	P1P2	242	0.00395017	0.188889	0.0677534	FALSE
ARCN1	chr11	118443410	+	27	GATCTCCAGGAGACCGGGCACAGG	P1P2	264	0.119283	0.281481	0.0976541	FALSE
ARCN1	chr11	118443410	+	28	GGATCTCCAGGAGACCGGGCACAGG	P1P2	264	-1.53041	0.292857	0.0976541	FALSE
ARCN1	chr11	118443413	+	25	GGATCTCCAGGAGACCGGGCAC	P1P2	267	1.25357	0.304	0.014456	FALSE
ARCN1	chr11	118443419	+	27	GCTCCATCGGATCTCCAGGAGACC	P1P2	273	-0.000628021	0.433333	0.174864	FALSE
ARCN1	chr11	118443420	+	26	GCTCCATCGGATCTCCAGGAGAC	P1P2	274	-2.3415	0.442308	0.0594492	FALSE
ARCN1	chr11	118443427	+	25	GAGTCAGCTCCATCGGATCTCC	P1P2	281	-0.0255344	0.536	0.0198574	FALSE
ARCN1	chr11	118443427	+	26	GGAGTCAGCTCCATCGGATCTCC	P1P2	281	1.7266	0.534615	0.0198574	FALSE
ARCN1	chr11	118443436	+	25	GATGGACTGGAGTCAGCTCCAT	P1P2	290	0.699185	0.528	0.270243	FALSE
ARCN1	chr11	118443451	+	25	GCGGGCACGACGACAGATGGAC	P1P2	305	1.47835	0.268	0.0843283	FALSE
ARCN1	chr11	118443451	+	28	GAAGCGGGCACGACGACAGATGGAC	P1P2	305	-1.31974	0.25	0.0843283	FALSE
ARCN1	chr11	118443456	+	23	GAAGCGGGCACGACGACAGA	P1P2	310	0.462558	0.2	0.194084	FALSE
ARCN1	chr11	118443456	+	24	GGAAGCGGGCACGACGACAGA	P1P2	310	0.760965	0.195833	0.194084	FALSE
ARCN1	chr11	118443456	+	26	GCGGAAGCGGGCACGACGACAGA	P1P2	310	-0.669646	0.188462	0.194084	FALSE
ARCN1	chr11	118443456	+	28	GTGCGGAAGCGGGCACGACGACAGA	P1P2	310	1.05214	0.182143	0.194084	FALSE
ARCN1	chr11	118443489	+	27	GCAAACGAGGGAGTCCAGCTGGTT	P1P2	343	-0.296183	0.181481	0.00578841	FALSE
ARCN1	chr11	118443494	+	28	GTCCCAGCAAACGAGGGAGTCCAGC	P1P2	348	-0.387116	0.2	0.358459	FALSE
ARCN1	chr11	118443505	+	24	GGGGCAGGTCCCAGCAAACGA	P1P2	359	-0.813345	0.179167	0.795863	FALSE
ARCN1	chr11	118443506	+	23	GGGGCAGGTCCCAGCAAACG	P1P2	360	0.669218	0.178261	0.253857	FALSE
ARCN1	chr11	118443525	+	26	GCAAAAACGCCGGGCCGTCTCAG	P1P2	379	-0.62959	0.146154	0.278905	FALSE
ARCN1	chr11	118443525	+	28	GAGCAAAAACGCCGGGCCGTCTCAG	P1P2	379	-0.461544	0.15	0.278905	FALSE
ARCN1	chr11	118443526	+	25	GCAAAAACGCCGGGCCGTCTCA	P1P2	380	-1.54263	0.148	0.0575759	FALSE
ARCN1	chr11	118443526	+	27	GAGCAAAAACGCCGGGCCGTCTCA	P1P2	380	-0.995566	0.151852	0.0575759	FALSE
ARCN1	chr11	118443527	+	24	GCAAAAACGCCGGGCCGTCTC	P1P2	381	0.683767	0.15	0.00376644	FALSE
ARCN1	chr11	118443527	+	26	GAGCAAAAACGCCGGGCCGTCTC	P1P2	381	-0.830633	0.153846	0.00376644	FALSE
ARCN1	chr11	118443537	+	25	GTTCTCGCAGAGCAAAAACGCC	P1P2	391		0.172	0.562788	FALSE
ARCN1	chr11	118443537	+	28	GAAGTTCTCGCAGAGCAAAAACGCC	P1P2	391	-0.362736	0.167857	0.562788	FALSE
ARCN1	chr11	118443538	+	24	GTTCTCGCAGAGCAAAAACGC	P1P2	392		0.175	0.222042	FALSE
ARCN1	chr11	118443538	+	27	GAAGTTCTCGCAGAGCAAAAACGC	P1P2	392	-1.54579	0.17037	0.222042	FALSE
ARCN1	chr11	118443582	+	22	GTTCCGAGGTCCGCAGCCT	P1P2	436	-0.430904	0.872727	0.0631268	FALSE
ARCN1	chr11	118443582	+	28	GCATCAGTTCCGAGGTCCGCAGCCT	P1P2	436	-0.127273	0.9	0.0631268	FALSE
ARCN1	chr11	118443583	+	27	GCATCAGTTCCGAGGTCCGCAGCC	P1P2	437	-0.00490336	0.918518	0.026818	FALSE
ARCN1	chr11	118443595	+	24	GGCGGGACAGCATCAGTTCCG	P1P2	449	0.472493	0.929167	0.582309	FALSE
ARCN1	chr11	118443613	+	25	GCCTAAGCGCCAGGGAACCGGC	P1P2	467	0.756963	0.476	0.617618	FALSE
ARCN1	chr11	118443613	+	27	GAGCCTAAGCGCCAGGGAACCGGC	P1P2	467	-0.472818	0.47037	0.617618	FALSE
ARCN1	chr11	118443614	+	24	GCCTAAGCGCCAGGGAACCGG	P1P2	468	0.839133	0.4625	0.251432	FALSE
ARCN1	chr11	118443614	+	26	GAGCCTAAGCGCCAGGGAACCGG	P1P2	468	-0.0829284	0.457692	0.251432	FALSE
ARCN1	chr11	118443617	+	26	GCTGAGCCTAAGCGCCAGGGAAC	P1P2	471	0.365176	0.426923	0.0544818	FALSE
ARCN1	chr11	118443623	+	24	GCCTGCTGAGCCTAAGCGCCA	P1P2	477	1.21336	0.4	0.522224	FALSE
ARCN1	chr11	118443624	+	28	GCCCAGCCTGCTGAGCCTAAGCGCC	P1P2	478	-0.534384	0.4	0.0956675	FALSE
ARCN1	chr11	118443651	+	23	GGACCAGAACCTCCGGAGAC	P1P2	505	0.83323	0.334783	0.0255172	FALSE
ARCN1	chr11	118443651	+	26	GAAGGACCAGAACCTCCGGAGAC	P1P2	505	-1.38547	0.319231	0.0255172	FALSE
ARCN1	chr11	118443658	+	27	GATTAACAGAAGGACCAGAACCTC	P1P2	512	1.75235	0.240741	0.0379809	FALSE
ARCN1	chr11	118443672	+	23	GACAAGCTCTGATTAACAGA	P1P2	526	-1.59881	0.169565	0.391191	FALSE
ARCN1	chr11	118443672	+	25	GAGACAAGCTCTGATTAACAGA	P1P2	526	0.380937	0.18	0.391191	FALSE
ARCN1	chr11	118443672	+	26	GGAGACAAGCTCTGATTAACAGA	P1P2	526	0.621194	0.184615	0.391191	FALSE
ARCN1	chr11	118443672	+	27	GGGAGACAAGCTCTGATTAACAGA	P1P2	526	-0.085998	0.192593	0.391191	FALSE
ARCN1	chr11	118443696	+	23	GCCTAGCAAACACCGGGGGT	P1P2	550	1.01832	0.778261	0.0936821	FALSE
ARCN1	chr11	118443696	+	24	GGCCTAGCAAACACCGGGGGT	P1P2	550	-3.33551	0.804167	0.0936821	FALSE
ARCN1	chr11	118443697	+	23	GGCCTAGCAAACACCGGGGG	P1P2	551	-0.0832396	0.826087	0.0445748	FALSE
ARCN1	chr11	118443701	+	28	GTTATCAACGGCCTAGCAAACACCG	P1P2	555	-0.270075	1.13929	0.646198	FALSE
ARCN1	chr11	118443702	+	27	GTTATCAACGGCCTAGCAAACACC	P1P2	556	-2.10913	1.16296	0.326213	FALSE
ARCN1	chr11	118443703	+	26	GTTATCAACGGCCTAGCAAACAC	P1P2	557	-1.34336	1.18846	0.148922	FALSE
ARCN1	chr11	118443703	+	28	GAGTTATCAACGGCCTAGCAAACAC	P1P2	557	0.362947	1.23929	0.148922	FALSE
ARCN1	chr11	118443718	+	25	GATTTGCATTTCGAGTTATCAA	P1P2	572	-2.41075	1.996	0.355372	FALSE
ARCN1	chr11	118443718	+	26	GGATTTGCATTTCGAGTTATCAA	P1P2	572	-3.25517	2.03077	0.355372	FALSE
ARCN1	chr11	118443718	+	28	GTGGATTTGCATTTCGAGTTATCAA	P1P2	572	-0.0562404	2.09643	0.355372	FALSE
ARCN1	chr11	118443834	+	28	GTAGTGGAAGGTTTCAGAGACACTT	P1P2	688	0.158721	0.296429	0.311128	FALSE
ARCN1	chr11	118443835	+	27	GTAGTGGAAGGTTTCAGAGACACT	P1P2	689	-1.67051	0.3	0.0560221	FALSE
ARCN1	chr11	118443851	+	24	GAGTTCTGCGGAAGTAGTGGA	P1P2	705	-0.0578438	0.395833	0.383879	FALSE
ARCN1	chr11	118443851	+	26	GTGAGTTCTGCGGAAGTAGTGGA	P1P2	705	-1.15439	0.411538	0.383879	FALSE
ARCN1	chr11	118443883	+	26	GTACCCCGAGTCACACTAACAAA	P1P2	737	0.403488	2.56538	0.316122	FALSE
ARCN1	chr11	118443923	+	25	GAACCTGCTCACATTTTCCCAG	P1P2	777	0.670335	1.932	0.633884	FALSE
ARCN1	chr11	118443923	+	26	GGAACCTGCTCACATTTTCCCAG	P1P2	777	-0.5958	1.90769	0.633884	FALSE
ARCN1	chr11	118443985	+	27	GCCACATACACATTTTTCTTCACC	P1P2	839	-0.398494	1.12963	0.0668836	FALSE
ARCN1	chr11	118444062	+	26	GGAAGGCAAGTAACTGGTCTCGG	P1P2	916	-0.0636802	0.815385	0.440995	FALSE
ARCN1	chr11	118444062	+	27	GGGAAGGCAAGTAACTGGTCTCGG	P1P2	916	-0.861721	0.825926	0.440995	FALSE
ARCN1	chr11	118444065	+	28	GCATGGGAAGGCAAGTAACTGGTCT	P1P2	919	0.658459	0.882143	0.142119	FALSE
ARCN1	chr11	118444071	+	28	GATAACGCATGGGAAGGCAAGTAAC	P1P2	925	1.79255	0.957143	0.0860363	FALSE
ARCN1	chr11	118444082	+	28	GAGTATACAAAGATAACGCATGGGA	P1P2	936	0.757841	0.992857	0.0225881	FALSE
ARCN1	chr11	118444086	+	24	GAGTATACAAAGATAACGCAT	P1P2	940	0.2387	0.991667	0.559641	FALSE
ARCN1	chr11	118444086	+	27	GATGAGTATACAAAGATAACGCAT	P1P2	940	-0.436205	0.981481	0.559641	FALSE
ARCN1	chr11	118444087	+	26	GATGAGTATACAAAGATAACGCA	P1P2	941	0.745195	0.976923	0.246815	FALSE
ARCN1	chr11	118444185	+	28	GAATATCCACAAATCACAGCGATAA	P1P2	1039	-0.185043	0.460714	0.0344133	FALSE
ARCN1	chr11	118444398	+	23	GGTTGTCAATAGAACTTATT	P1P2	1252	-0.186838	1.03478	0.0652782	TRUE
ARCN1	chr11	118444398	+	24	GGGTTGTCAATAGAACTTATT	P1P2	1252	-0.332749	1.05	0.0652782	TRUE
ARCN1	chr11	118444471	+	25	GAGGCTGAGAAAAGCTGTTCAG	P1P2	1325	0.43243	0.996	0.333964	TRUE
ARCN1	chr11	118444492	+	26	GTTTGATGCAATTTATATACCTG	P1P2	1346	0.329054	1.03846	0.165753	TRUE
ARCN1	chr11	118444558	+	24	GAAACTGAAAATACAAGTTTC	P1P2	1412	1.10425	0.933333	0.00658264	FALSE
ARCN1	chr11	118444558	+	26	GAGAAACTGAAAATACAAGTTTC	P1P2	1412	-1.5193	0.942308	0.00658264	FALSE
ARCN1	chr11	118444558	+	27	GGAGAAACTGAAAATACAAGTTTC	P1P2	1412	-1.4029	0.944444	0.00658264	FALSE
ARCN1	chr11	118444625	+	28	GCATTATTAATTCCAGGGTGTAAAC	P1P2	1479	-0.39389	0.610714	0.246693	FALSE
ARCN1	chr11	118444626	+	27	GCATTATTAATTCCAGGGTGTAAA	P1P2	1480	-1.06027	0.611111	0.198847	FALSE
ARCN1	chr11	118444635	+	28	GCTCTAAAATGCATTATTAATTCCA	P1P2	1489	-0.07197	0.603571	0.291455	FALSE
ARCN1	chr11	118444636	+	27	GCTCTAAAATGCATTATTAATTCC	P1P2	1490	-0.517393	0.607407	0.0179165	FALSE
ARCN1	chr11	118444801	+	27	GTTATATTTTATATATATCACGTA	P1P2	1655	-1.27637	0.355556	0.357826	FALSE
ARCN1	chr11	118444802	+	26	GTTATATTTTATATATATCACGT	P1P2	1656	-3.12284	0.357692	0.170413	FALSE
ARCN1	chr11	118444908	+	24	GTACACAAATCTGTGGGTATC	P1P2	1762	-0.173147	1.2375	0.0016173	FALSE
ARCN1	chr11	118444908	+	26	GAGTACACAAATCTGTGGGTATC	P1P2	1762	0.892293	1.23462	0.0016173	FALSE
ARCN1	chr11	118444915	+	27	GTTCTCCAGAGTACACAAATCTGT	P1P2	1769		1.18519	0.424299	FALSE
ARCN1	chr11	118444916	+	26	GTTCTCCAGAGTACACAAATCTG	P1P2	1770		1.18077	0.0613121	FALSE
ARCN1	chr11	118445014	+	23	GGATCTGTTTGTAAAGGAGC	P1P2	1868	0.116214	0.834783	0.0912548	FALSE
ARCN1	chr11	118445014	+	24	GGGATCTGTTTGTAAAGGAGC	P1P2	1868	0.129269	0.858333	0.0912548	FALSE
ARCN1	chr11	118445020	+	23	GTCCAGGGATCTGTTTGTAA	P1P2	1874	0.226232	1.06522	0.153199	FALSE
ARCN1	chr11	118445097	+	27	gaaatgttgagctaaaataaACGC	P1P2	1951	-0.124357	0.692593	0.180314	FALSE
ARCN1	chr11	118445137	+	26	gttctttcaacttttccagatgt	P1P2	1991	-1.55941	0.426923	0.193313	FALSE
ARCN1	chr11	118445185	+	25	gttagttatagaatctagttgg	P1P2	2039	3.06153	0.26	0.193313	FALSE
ARCN1	chr11	118445188	+	27	gaaatgttagttatagaatctagt	P1P2	2042	-0.653936	0.274074	0.193313	FALSE
ARCN1	chr11	118445335	+	26	GCACTTCAATAACTAAAGCCAAA	P1P2	2189	-0.214625	0.238462	0.68637	FALSE
ARCN1	chr11	118445336	+	25	GCACTTCAATAACTAAAGCCAA	P1P2	2190	0.361144	0.24	0.219982	FALSE
ARCN1	chr11	118445384	+	27	GCATTTGTTCACTTATTTATCTAT	P1P2	2238	-0.470043	0.303704	0.06054	FALSE
ARCN1	chr11	118445985	+	26	GATACATAAATAATACAGGggcc	P1P2	2839	-1.46676	2.32308	0.227706	FALSE
ARCN1	chr11	118445986	+	25	GATACATAAATAATACAGGggc	P1P2	2840	-1.03983	2.308	0.114027	FALSE
ARCN1	chr11	118446065	+	26	GACATAAATAGATGGCAAATCAA	P1P2	2919	0.577715	0.819231	0.353002	FALSE
ARCN1	chr11	118446323	+	26	GCTAGTTTCTATAATTGTCAGGG	P1P2	3177	-0.64721	0.896154	0.12572	FALSE
ARCN1	chr11	118446323	+	27	GGCTAGTTTCTATAATTGTCAGGG	P1P2	3177	-1.89458	0.9	0.12572	FALSE
ARCN1	chr11	118446326	+	24	GGCTAGTTTCTATAATTGTCA	P1P2	3180	-1.10757	0.925	0.317898	FALSE
ARCN1	chr11	118446327	+	23	GGCTAGTTTCTATAATTGTC	P1P2	3181	-0.201972	0.934783	0.036472	FALSE
ARCN1	chr11	118446348	+	28	GCACACACAATTCATGGTCATATTA	P1P2	3202	-0.501178	1.31786	0.0368283	FALSE
ARCN1	chr11	118446512	+	27	GAATAACAGGTGGTATAATAATTC	P1P2	3366	-1.81774	1.54074	0.00496716	FALSE
ARCN1	chr11	118446526	+	24	GAGAGATACAAGAATAACAGG	P1P2	3380	1.51707	1.75417	0.582351	FALSE
ARCN1	chr11	118446526	+	28	GCAAGAGAGATACAAGAATAACAGG	P1P2	3380	0.346028	1.70714	0.582351	FALSE
ARCN1	chr11	118446529	+	25	GCAAGAGAGATACAAGAATAAC	P1P2	3383	0.178184	1.716	0.0808841	FALSE
ARCN1	chr11	118446529	+	27	GTGCAAGAGAGATACAAGAATAAC	P1P2	3383	-0.538389	1.68519	0.0808841	FALSE
ARCN1	chr11	118446595	+	26	GAACAATATTTTATAGTAACATT	P1P2	3449	-1.34855	1.1	0.0233556	FALSE
ARCN1	chr11	118446595	+	27	GGAACAATATTTTATAGTAACATT	P1P2	3449	0.345094	1.0963	0.0233556	FALSE
ARCN1	chr11	118446779	+	22	gaaatatccctaacatagg	P1P2	3633	-1.08269	0.722727	0.193313	FALSE
ARCN1	chr11	118446782	+	26	gattattgaaatatccctaacat	P1P2	3636	-0.343544	0.903846	0.193313	FALSE
ARCN1	chr11	118447034	+	27	gcccataagttagatgatctctcc	P1P2	3888	0.630374	0.659259	0.230991	FALSE
ARCN1	chr11	118447034	+	28	ggcccataagttagatgatctctcc	P1P2	3888	-1.19853	0.667857	0.230991	FALSE
ARCN1	chr11	118447378	+	26	GCTACTAATATGGCTAGAAGGTA	P1P2	4232	1.25733	2.38846	0.0395706	FALSE
ARCN1	chr11	118447383	+	27	GTTACAGCTACTAATATGGCTAGA	P1P2	4237	0.695477	2.29259	0.190055	FALSE
ARCN1	chr11	118447391	+	27	GTCTCTCTGTTACAGCTACTAATA	P1P2	4245	-0.75261	1.97407	0.0373772	FALSE
ARCN1	chr11	118447391	+	28	GGTCTCTCTGTTACAGCTACTAATA	P1P2	4245	-1.91578	1.94643	0.0373772	FALSE
ARCN1	chr11	118447430	+	25	GACACCACAAATTACAGGTTCC	P1P2	4284	0.66876	1.672	0.0126167	FALSE
ARCN1	chr11	118447430	+	26	GGACACCACAAATTACAGGTTCC	P1P2	4284	0.299418	1.66538	0.0126167	FALSE
ARCN1	chr11	118447437	+	28	GAACACCCAGGACACCACAAATTAC	P1P2	4291	-0.657128	1.63214	0.267507	FALSE
ARCN1	chr11	118447454	+	28	GTATAGCATAAATCTCCGAACACCC	P1P2	4308	-1.5952	1.92857	0.748338	FALSE
ARCN1	chr11	118447572	+	28	GTACGTCAAGATGAAGAAAGAAGTA	P1P2	4426	1.18848	1.83571	0.607195	FALSE
ARCN1	chr11	118447573	+	27	GTACGTCAAGATGAAGAAAGAAGT	P1P2	4427	-0.0698861	1.8	0.100997	FALSE
ARCN1	chr11	118447914	+	24	GATCATGCTTTGATGAATTCC	P1P2	4768	0.153417	0.229167	0.0048567	FALSE
ARF1	chr1	228265390	-	26	GACCCCGTCTGTCTCCCAGTCCC	P1P2	-5047	0.0523661	3.07308	0.0473962	FALSE
ARF1	chr1	228265420	-	28	GCCCCCAGAGAGCTCTGACTCAAAA	P1P2	-5017	2.88837	2.5	0.292794	FALSE
ARF1	chr1	228265472	-	23	GCCATGTCTCTTCAAAGCCG	P1P2	-4965	1.24509	1.87391	0.708077	FALSE
ARF1	chr1	228265473	-	24	GCCATGTCTCTTCAAAGCCGT	P1P2	-4964	0.422792	1.90833	0.322573	FALSE
ARF1	chr1	228265474	-	25	GCCATGTCTCTTCAAAGCCGTG	P1P2	-4963	3.92357	1.94	0.825385	FALSE
ARF1	chr1	228265496	-	25	GGGCAGCACCCAGTGCATTCCC	P1P2	-4941	0.766608	2.884	0.110778	FALSE
ARF1	chr1	228265496	-	26	GGGGCAGCACCCAGTGCATTCCC	P1P2	-4941	-0.664801	2.87308	0.110778	FALSE
ARF1	chr1	228265496	-	28	GTGGGGCAGCACCCAGTGCATTCCC	P1P2	-4941	0.327657	2.84286	0.110778	FALSE
ARF1	chr1	228265497	-	25	GGCAGCACCCAGTGCATTCCCA	P1P2	-4940	0.0884528	2.888	0.52075	FALSE
ARF1	chr1	228265497	-	26	GGGCAGCACCCAGTGCATTCCCA	P1P2	-4940	-0.63347	2.87692	0.52075	FALSE
ARF1	chr1	228265497	-	27	GGGGCAGCACCCAGTGCATTCCCA	P1P2	-4940	0.68426	2.86667	0.52075	FALSE
ARF1	chr1	228265528	-	25	GCTCAGATACAGGTCTCGACGG	P1P2	-4909	1.14928	1.104	0.381987	FALSE
ARF1	chr1	228265528	-	27	GAGCTCAGATACAGGTCTCGACGG	P1P2	-4909	0.355063	1.1963	0.381987	FALSE
ARF1	chr1	228265534	-	26	GATACAGGTCTCGACGGTGGCCA	P1P2	-4903	-0.0119416	0.711538	0.322152	FALSE
ARF1	chr1	228265544	-	24	GACGGTGGCCAAGGAGATCCC	P1P2	-4893	-0.655947	0.258333	0.216997	FALSE
ARF1	chr1	228265548	-	24	GTGGCCAAGGAGATCCCAGGC	P1P2	-4889	1.41551	0.216667	0.0269999	FALSE
ARF1	chr1	228265548	-	25	GGTGGCCAAGGAGATCCCAGGC	P1P2	-4889	0.46311	0.224	0.0269999	FALSE
ARF1	chr1	228265548	-	28	GACGGTGGCCAAGGAGATCCCAGGC	P1P2	-4889	2.32595	0.253571	0.0269999	FALSE
ARF1	chr1	228265562	-	27	GATCCCAGGCAGGCCTTGAGCTGT	P1P2	-4875	-0.17265	0.277778	0.00395369	FALSE
ARF1	chr1	228265563	-	28	GATCCCAGGCAGGCCTTGAGCTGTA	P1P2	-4874	-0.0759048	0.285714	0.183374	FALSE
ARF1	chr1	228265572	-	25	GCCTTGAGCTGTAGGGCAAAGT	P1P2	-4865	-0.382363	0.516	0.116362	FALSE
ARF1	chr1	228265572	-	26	GGCCTTGAGCTGTAGGGCAAAGT	P1P2	-4865	-0.832208	0.503846	0.116362	FALSE
ARF1	chr1	228265592	-	25	GTTGGTCACTTTACAGAATCCC	P1P2	-4845	-0.903666	1.52	0.141572	FALSE
ARF1	chr1	228265610	-	28	GAATCCCAGGTTCTGACATCCAGCC	P1P2	-4827	0.26679	1.59286	0.365184	FALSE
ARF1	chr1	228265621	-	25	GACATCCAGCCTGGAAGTAGAC	P1P2	-4816	0.115273	1.252	0.502117	FALSE
ARF1	chr1	228265641	-	26	GACCGGAAAGATCCCTCTCCCCC	P1P2	-4796	-0.99738	1.22692	0.117781	FALSE
ARF1	chr1	228265720	-	25	gctggggtgacagaAAgaagga	P1P2	-4717	0.604373	0.584	0.208966	FALSE
ARF1	chr1	228265784	-	25	gaaggaaggagggGGAGGTACT	P1P2	-4653	0.741824	0.088	0.0435416	FALSE
ARF1	chr1	228265784	-	26	ggaaggaaggagggGGAGGTACT	P1P2	-4653	-0.781188	0.0846154	0.0435416	FALSE
ARF1	chr1	228265785	-	23	ggaaggagggGGAGGTACTA	P1P2	-4652	0.0588835	0.108696	0.325637	FALSE
ARF1	chr1	228265785	-	26	gaaggaaggagggGGAGGTACTA	P1P2	-4652	0.934971	0.0961538	0.325637	FALSE
ARF1	chr1	228265785	-	27	ggaaggaaggagggGGAGGTACTA	P1P2	-4652	-2.00488	0.0925926	0.325637	FALSE
ARF1	chr1	228265788	-	25	gaaggagggGGAGGTACTAGGG	P1P2	-4649	-3.01357	0.14	0.060654	FALSE
ARF1	chr1	228265788	-	26	ggaaggagggGGAGGTACTAGGG	P1P2	-4649	0.608201	0.134615	0.060654	FALSE
ARF1	chr1	228265789	-	26	gaaggagggGGAGGTACTAGGGT	P1P2	-4648	-0.0651503	0.15	0.190004	FALSE
ARF1	chr1	228265789	-	27	ggaaggagggGGAGGTACTAGGGT	P1P2	-4648	-0.0698823	0.144444	0.190004	FALSE
ARF1	chr1	228265790	-	23	gagggGGAGGTACTAGGGTG	P1P2	-4647	-1.07363	0.186957	0.209869	FALSE
ARF1	chr1	228265790	-	24	ggagggGGAGGTACTAGGGTG	P1P2	-4647	-0.665699	0.179167	0.209869	FALSE
ARF1	chr1	228265790	-	27	gaaggagggGGAGGTACTAGGGTG	P1P2	-4647	-0.129304	0.159259	0.209869	FALSE
ARF1	chr1	228265790	-	28	ggaaggagggGGAGGTACTAGGGTG	P1P2	-4647	-0.327643	0.153571	0.209869	FALSE
ARF1	chr1	228265796	-	25	gGGAGGTACTAGGGTGGGGAGT	P1P2	-4641	-0.885138	0.284	0.0429023	FALSE
ARF1	chr1	228265796	-	26	ggGGAGGTACTAGGGTGGGGAGT	P1P2	-4641	-0.490678	0.276923	0.0429023	FALSE
ARF1	chr1	228265796	-	27	gggGGAGGTACTAGGGTGGGGAGT	P1P2	-4641	-0.351821	0.27037	0.0429023	FALSE
ARF1	chr1	228265800	-	27	GAGGTACTAGGGTGGGGAGTTGGC	P1P2	-4637	0.0626215	0.344444	0.23693	FALSE
ARF1	chr1	228265800	-	28	GGAGGTACTAGGGTGGGGAGTTGGC	P1P2	-4637	-0.0318804	0.335714	0.23693	FALSE
ARF1	chr1	228265825	-	26	GTAGACAACTTGCCCAAGTCCCA	P1P2	-4612	0.312209	0.480769	0.225421	FALSE
ARF1	chr1	228265825	-	27	GGTAGACAACTTGCCCAAGTCCCA	P1P2	-4612	-0.255699	0.485185	0.225421	FALSE
ARF1	chr1	228265826	-	27	GTAGACAACTTGCCCAAGTCCCAC	P1P2	-4611	-0.0760072	0.481481	0.634805	FALSE
ARF1	chr1	228265826	-	28	GGTAGACAACTTGCCCAAGTCCCAC	P1P2	-4611	1.93861	0.485714	0.634805	FALSE
ARF1	chr1	228265834	-	24	GCCCAAGTCCCACGGGCAGAA	P1P2	-4603	1.41346	0.545833	0.271911	FALSE
ARF1	chr1	228265850	-	25	GCAGAAGGGAGTGTCCGAAAGT	P1P2	-4587	-0.153643	1.664	0.259685	FALSE
ARF1	chr1	228265850	-	26	GGCAGAAGGGAGTGTCCGAAAGT	P1P2	-4587	-0.737018	1.61923	0.259685	FALSE
ARF1	chr1	228265850	-	27	GGGCAGAAGGGAGTGTCCGAAAGT	P1P2	-4587	-1.13032	1.57778	0.259685	FALSE
ARF1	chr1	228265856	-	28	GAAGGGAGTGTCCGAAAGTAGGCAG	P1P2	-4581	0.232512	2.21071	0.67083	FALSE
ARF1	chr1	228265868	-	27	GAAAGTAGGCAGAGGCCCACAGTC	P1P2	-4569	3.42437	3.92593	0.0982816	FALSE
ARF1	chr1	228265869	-	28	GAAAGTAGGCAGAGGCCCACAGTCA	P1P2	-4568	-0.313395	3.98929	0.0271959	FALSE
ARF1	chr1	228265887	-	25	GTCAGGGCCACTGTCTGAGTCC	P1P2	-4550	0.273733	5.136	0.0167041	FALSE
ARF1	chr1	228265892	-	25	GGCCACTGTCTGAGTCCAGGAC	P1P2	-4545	0.230561	4.644	0.237668	FALSE
ARF1	chr1	228265892	-	26	GGGCCACTGTCTGAGTCCAGGAC	P1P2	-4545	-0.0117563	4.68077	0.237668	FALSE
ARF1	chr1	228265913	-	27	GACAGGCAGAAGGCTCATGTGTGC	P1P2	-4524	1.90475	1.7037	0.0565805	FALSE
ARF1	chr1	228265913	-	28	GGACAGGCAGAAGGCTCATGTGTGC	P1P2	-4524	-0.164734	1.77857	0.0565805	FALSE
ARF1	chr1	228265917	-	26	GCAGAAGGCTCATGTGTGCAGGC	P1P2	-4520	1.44305	1.40769	0.0709247	FALSE
ARF1	chr1	228265917	-	27	GGCAGAAGGCTCATGTGTGCAGGC	P1P2	-4520	0.742432	1.45556	0.0709247	FALSE
ARF1	chr1	228265918	-	27	GCAGAAGGCTCATGTGTGCAGGCA	P1P2	-4519	-0.670759	1.41852	0.0429305	FALSE
ARF1	chr1	228265918	-	28	GGCAGAAGGCTCATGTGTGCAGGCA	P1P2	-4519	-0.886394	1.46429	0.0429305	FALSE
ARF1	chr1	228265939	-	24	GGGACCACTCTAGCTGACAAG	P1P2	-4498	-0.148456	1.70833	0.520343	FALSE
ARF1	chr1	228265939	-	27	GCAGGGACCACTCTAGCTGACAAG	P1P2	-4498	0.130262	1.68889	0.520343	FALSE
ARF1	chr1	228265939	-	28	GGCAGGGACCACTCTAGCTGACAAG	P1P2	-4498	-0.37387	1.67857	0.520343	FALSE
ARF1	chr1	228265940	-	24	GGACCACTCTAGCTGACAAGT	P1P2	-4497	-0.988155	1.70833	0.0891999	FALSE
ARF1	chr1	228265940	-	25	GGGACCACTCTAGCTGACAAGT	P1P2	-4497	-0.995651	1.704	0.0891999	FALSE
ARF1	chr1	228265940	-	28	GCAGGGACCACTCTAGCTGACAAGT	P1P2	-4497	-0.536182	1.68571	0.0891999	FALSE
ARF1	chr1	228265941	-	24	GACCACTCTAGCTGACAAGTG	P1P2	-4496	-0.117377	1.70833	0.18336	FALSE
ARF1	chr1	228265941	-	25	GGACCACTCTAGCTGACAAGTG	P1P2	-4496	0.00652888	1.704	0.18336	FALSE
ARF1	chr1	228265941	-	26	GGGACCACTCTAGCTGACAAGTG	P1P2	-4496	1.14612	1.7	0.18336	FALSE
ARF1	chr1	228265974	-	23	GCCTACGATAAGTGATGCAC	P1P2	-4463	-2.73492	1.7	0.0775963	FALSE
ARF1	chr1	228265979	-	22	GATAAGTGATGCACGGGAC	P1P2	-4458	-1.24346	1.7	0.0428294	FALSE
ARF1	chr1	228265979	-	28	GCCTACGATAAGTGATGCACGGGAC	P1P2	-4458	-0.542589	1.7	0.0428294	FALSE
ARF1	chr1	228265980	-	23	GATAAGTGATGCACGGGACT	P1P2	-4457	0.478067	1.7	0.047068	FALSE
ARF1	chr1	228265981	-	24	GATAAGTGATGCACGGGACTG	P1P2	-4456	-0.394764	1.7	0.279234	FALSE
ARF1	chr1	228266014	-	26	GCCATCAGACACTTTAAGACTTG	P1P2	-4423	0.557819	1.54615	0.0398541	FALSE
ARF1	chr1	228266014	-	28	GTGCCATCAGACACTTTAAGACTTG	P1P2	-4423	0.550286	1.55	0.0398541	FALSE
ARF1	chr1	228266028	-	23	GACTTGTGGCATGTCACTTT	P1P2	-4409	-4.84876	1.88261	0.00502561	FALSE
ARF1	chr1	228266029	-	24	GACTTGTGGCATGTCACTTTG	P1P2	-4408	0.789577	1.91667	0.313408	FALSE
ARF1	chr1	228266037	-	24	GCATGTCACTTTGGGGATGCC	P1P2	-4400	-0.35979	2.40417	0.186373	FALSE
ARF1	chr1	228266037	-	25	GGCATGTCACTTTGGGGATGCC	P1P2	-4400	0.0610132	2.376	0.186373	FALSE
ARF1	chr1	228266037	-	27	GTGGCATGTCACTTTGGGGATGCC	P1P2	-4400	-0.811073	2.31852	0.186373	FALSE
ARF1	chr1	228266057	-	26	GCCAGGTATTTTGTTATCCTGAT	P1P2	-4380	0.878351	3.31154	0.0450874	FALSE
ARF1	chr1	228266060	-	24	GTATTTTGTTATCCTGATAGG	P1P2	-4377	-1.74983	3.35833	0.299701	FALSE
ARF1	chr1	228266060	-	25	GGTATTTTGTTATCCTGATAGG	P1P2	-4377	0.726244	3.352	0.299701	FALSE
ARF1	chr1	228266070	-	27	GTTATCCTGATAGGAGGAGTGGAT	P1P2	-4367	0.349892	3.34444	0.357207	FALSE
ARF1	chr1	228266157	-	26	GCCTCTGTCACTCCAGTTGATCG	P1P2	-4280	-0.0715213	0.85	0.396095	FALSE
ARF1	chr1	228266182	-	26	GAGTATAAACAATATTTCCAgcc	P1P2	-4255	0.52007	1.52308	0.0718889	FALSE
ARF1	chr1	228266182	-	27	GGAGTATAAACAATATTTCCAgcc	P1P2	-4255	1.05451	1.5	0.0718889	FALSE
ARF1	chr1	228266382	-	26	gatatttcagcaacaaaaaccac	P1P2	-4055	-0.386242	0.576923	0.193313	FALSE
ARF1	chr1	228266404	-	24	ggtattgctaatactgctttt	P1P2	-4033	0.458849	1	0.193313	FALSE
ARF1	chr1	228266405	-	24	gtattgctaatactgcttttg	P1P2	-4032	2.1986	1	0.193313	FALSE
ARF1	chr1	228266405	-	25	ggtattgctaatactgcttttg	P1P2	-4032	0.295366	1	0.193313	FALSE
ARF1	chr1	228266428	-	24	gaatgctgcttgcatttaaga	P1P2	-4009	1.30319	1.32083	0.193313	FALSE
ARF1	chr1	228266428	-	25	ggaatgctgcttgcatttaaga	P1P2	-4009	1.49914	1.308	0.193313	FALSE
ARF1	chr1	228266428	-	26	gggaatgctgcttgcatttaaga	P1P2	-4009	-0.634803	1.29615	0.193313	FALSE
ARF1	chr1	228266428	-	27	ggggaatgctgcttgcatttaaga	P1P2	-4009	0.328661	1.28519	0.193313	FALSE
ARF1	chr1	228266429	-	25	gaatgctgcttgcatttaagat	P1P2	-4008	-0.316876	1.34	0.193313	FALSE
ARF1	chr1	228266429	-	26	ggaatgctgcttgcatttaagat	P1P2	-4008	0.0200687	1.32692	0.193313	FALSE
ARF1	chr1	228266429	-	27	gggaatgctgcttgcatttaagat	P1P2	-4008	0.5755	1.31481	0.193313	FALSE
ARF1	chr1	228266429	-	28	ggggaatgctgcttgcatttaagat	P1P2	-4008	-0.813653	1.30357	0.193313	FALSE
ARF1	chr1	228266432	-	28	gaatgctgcttgcatttaagatggg	P1P2	-4005	0.0957892	1.40714	0.193313	FALSE
ARF1	chr1	228266455	-	27	gaggaaatgctaaatgtcactcag	P1P2	-3982	-0.132281	2.74815	0.193313	FALSE
ARF1	chr1	228266455	-	28	ggaggaaatgctaaatgtcactcag	P1P2	-3982	0.0926993	2.71429	0.193313	FALSE
ARF1	chr1	228266498	-	24	gcttttctGCAATCCCTCCCC	P1P2	-3939	-0.120682	3.05	0.120348	FALSE
ARF1	chr1	228266498	-	26	gtgcttttctGCAATCCCTCCCC	P1P2	-3939	-0.956106	3.12692	0.120348	FALSE
ARF1	chr1	228266499	-	25	gcttttctGCAATCCCTCCCCA	P1P2	-3938	-0.0581504	3.044	0.878051	FALSE
ARF1	chr1	228266499	-	27	gtgcttttctGCAATCCCTCCCCA	P1P2	-3938	-0.67334	3.11852	0.878051	FALSE
ARF1	chr1	228266551	-	27	GTCCACCCAGGCATGACAATAGGC	P1P2	-3886	0.444708	2.39259	0.265729	FALSE
ARF1	chr1	228266607	-	27	GAAGCCAGCCTGCCTGGGAAAACA	P1P2	-3830	-0.752608	0.544444	0.189972	FALSE
ARF1	chr1	228266630	-	24	GTCCCCTGAGAGCTAGTCCAG	P1P2	-3807	0.507211	2.625	0.270432	FALSE
ARF1	chr1	228266633	-	27	GTCCCCTGAGAGCTAGTCCAGGGG	P1P2	-3804	2.13992	2.87778	0.158516	FALSE
ARF1	chr1	228266633	-	28	GGTCCCCTGAGAGCTAGTCCAGGGG	P1P2	-3804	1.79879	2.80714	0.158516	FALSE
ARF1	chr1	228266634	-	28	GTCCCCTGAGAGCTAGTCCAGGGGA	P1P2	-3803	0.0378523	2.95714	0.269562	FALSE
ARF1	chr1	228266651	-	25	GGGGAGGGACATGTGCAGCTCT	P1P2	-3786	-1.67012	4.772	0.0443481	FALSE
ARF1	chr1	228266664	-	24	GCAGCTCTAGGCTTTCATCTG	P1P2	-3773	0.514539	3.64167	0.0277274	FALSE
ARF1	chr1	228266664	-	26	GTGCAGCTCTAGGCTTTCATCTG	P1P2	-3773	0.313347	3.76154	0.0277274	FALSE
ARF1	chr1	228266669	-	26	GCTCTAGGCTTTCATCTGAGGTT	P1P2	-3768	1.65136	3.15769	0.0851813	FALSE
ARF1	chr1	228266673	-	24	GGCTTTCATCTGAGGTTTGGA	P1P2	-3764	0.573371	2.58333	0.820711	FALSE
ARF1	chr1	228266677	-	27	GCTTTCATCTGAGGTTTGGAGGGC	P1P2	-3760	-0.314918	2.41481	0.0332817	FALSE
ARF1	chr1	228266677	-	28	GGCTTTCATCTGAGGTTTGGAGGGC	P1P2	-3760	-0.248931	2.475	0.0332817	FALSE
ARF1	chr1	228266687	-	24	GTTTGGAGGGCTGGCAGGAGA	P1P2	-3750	2.24784	2.0625	0.0277893	FALSE
ARF1	chr1	228266687	-	25	GGTTTGGAGGGCTGGCAGGAGA	P1P2	-3750	0.637261	2.068	0.0277893	FALSE
ARF1	chr1	228266687	-	27	GAGGTTTGGAGGGCTGGCAGGAGA	P1P2	-3750	1.22049	2.08889	0.0277893	FALSE
ARF1	chr1	228266688	-	25	GTTTGGAGGGCTGGCAGGAGAT	P1P2	-3749	1.70289	2.092	0.0443068	FALSE
ARF1	chr1	228266688	-	26	GGTTTGGAGGGCTGGCAGGAGAT	P1P2	-3749	0.346008	2.09615	0.0443068	FALSE
ARF1	chr1	228266688	-	28	GAGGTTTGGAGGGCTGGCAGGAGAT	P1P2	-3749	1.09768	2.11429	0.0443068	FALSE
ARF1	chr1	228266689	-	26	GTTTGGAGGGCTGGCAGGAGATG	P1P2	-3748	0.349767	2.12308	0.0496959	FALSE
ARF1	chr1	228266689	-	27	GGTTTGGAGGGCTGGCAGGAGATG	P1P2	-3748	0.310533	2.12593	0.0496959	FALSE
ARF1	chr1	228266698	-	27	GGCTGGCAGGAGATGGGGAAACTG	P1P2	-3739	-0.834549	2.5037	0.296644	FALSE
ARF1	chr1	228266698	-	28	GGGCTGGCAGGAGATGGGGAAACTG	P1P2	-3739	0.013848	2.47857	0.296644	FALSE
ARF1	chr1	228266715	-	28	GGAAACTGAGGCCGGAGTGAATATA	P1P2	-3722	1.69384	2.95714	0.0308095	FALSE
ARF1	chr1	228266716	-	28	GAAACTGAGGCCGGAGTGAATATAA	P1P2	-3721	1.30843	2.94286	0.0825899	FALSE
ARF1	chr1	228266724	-	27	GCCGGAGTGAATATAAGGGGAAAC	P1P2	-3713	0.252941	2.68518	0.195918	FALSE
ARF1	chr1	228266724	-	28	GGCCGGAGTGAATATAAGGGGAAAC	P1P2	-3713	1.8883	2.70357	0.195918	FALSE
ARF1	chr1	228266739	-	23	GAAACAGGTGATGCTTTAAA	P1P2	-3698	0.713586	1.97391	0.137563	FALSE
ARF1	chr1	228266739	-	24	GGAAACAGGTGATGCTTTAAA	P1P2	-3698	0.903419	1.99167	0.137563	FALSE
ARF1	chr1	228266739	-	25	GGGAAACAGGTGATGCTTTAAA	P1P2	-3698	-0.214673	2.012	0.137563	FALSE
ARF1	chr1	228266739	-	26	GGGGAAACAGGTGATGCTTTAAA	P1P2	-3698	1.36662	2.03077	0.137563	FALSE
ARF1	chr1	228266774	-	24	GACGACTGTGAGCAAACTCCC	P1P2	-3663	-0.112333	0.508333	0.208069	FALSE
ARF1	chr1	228266783	-	24	GAGCAAACTCCCTGGAGTTCA	P1P2	-3654	0.591541	0.479167	0.0488374	FALSE
ARF1	chr1	228266783	-	26	GTGAGCAAACTCCCTGGAGTTCA	P1P2	-3654	-0.150009	0.480769	0.0488374	FALSE
ARF1	chr1	228266834	-	24	GTGTAGTGCAGGCAAGCCGCT	P1P2	-3603	-1.45892	1.375	0.572799	FALSE
ARF1	chr1	228266848	-	27	GCAAGCCGCTGGGACCCTCACCAC	P1P2	-3589	-0.605982	1.18889	0.0142638	FALSE
ARF1	chr1	228266848	-	28	GGCAAGCCGCTGGGACCCTCACCAC	P1P2	-3589	0.1112	1.19643	0.0142638	FALSE
ARF1	chr1	228266855	-	24	GGGACCCTCACCACTGGCCAC	P1P2	-3582	0.582081	1.11667	0.29097	FALSE
ARF1	chr1	228266855	-	27	GCTGGGACCCTCACCACTGGCCAC	P1P2	-3582	0.191516	1.12593	0.29097	FALSE
ARF1	chr1	228266886	-	25	GAATGACCCCAGACCCCAGCCC	P1P2	-3551	0.880715	2.196	0.207687	FALSE
ARF1	chr1	228266899	-	27	GACCCCAGCCCAGGCCCAGAAGGC	P1P2	-3538	1.23093	2.69259	0.0261326	FALSE
ARF1	chr1	228266905	-	26	GCCCAGGCCCAGAAGGCAGGGCA	P1P2	-3532	0.169114	2.56923	0.0886606	FALSE
ARF1	chr1	228266926	-	27	GCAGGGCCACCCTGAGCTGGGAGG	P1P2	-3511	1.08299	1.54815	0.0516272	FALSE
ARF1	chr1	228266926	-	28	GGCAGGGCCACCCTGAGCTGGGAGG	P1P2	-3511	0.916448	1.57143	0.0516272	FALSE
ARF1	chr1	228266927	-	28	GCAGGGCCACCCTGAGCTGGGAGGT	P1P2	-3510	-0.393158	1.53929	0.0191318	FALSE
ARF1	chr1	228266929	-	26	GGCCACCCTGAGCTGGGAGGTGG	P1P2	-3508	0.322018	1.45	0.0609348	FALSE
ARF1	chr1	228266929	-	27	GGGCCACCCTGAGCTGGGAGGTGG	P1P2	-3508	-0.505501	1.46667	0.0609348	FALSE
ARF1	chr1	228266977	-	24	GCATAGCCGTAATAATTCCTG	P1P2	-3460	1.93366	0.9375	0.191882	FALSE
ARF1	chr1	228266977	-	28	GTCAGCATAGCCGTAATAATTCCTG	P1P2	-3460	-1.00572	0.917857	0.191882	FALSE
ARF1	chr1	228266988	-	27	GTAATAATTCCTGTGGCGTGCTCC	P1P2	-3449	0.652466	1.01481	0.013354	FALSE
ARF1	chr1	228267012	-	26	GGTCCTGTGGTGTGACCAGCCAG	P1P2	-3425	0.200595	0.888461	0.258598	FALSE
ARF1	chr1	228267013	-	26	GTCCTGTGGTGTGACCAGCCAGA	P1P2	-3424	-0.582737	0.876923	0.804871	FALSE
ARF1	chr1	228267013	-	27	GGTCCTGTGGTGTGACCAGCCAGA	P1P2	-3424	-0.577112	0.885185	0.804871	FALSE
ARF1	chr1	228267017	-	25	GTGGTGTGACCAGCCAGAGGGT	P1P2	-3420	-1.02087	0.84	0.324054	FALSE
ARF1	chr1	228267023	-	26	GTGACCAGCCAGAGGGTAGGCTT	P1P2	-3414	0.326066	0.896154	0.0164943	FALSE
ARF1	chr1	228267023	-	28	GTGTGACCAGCCAGAGGGTAGGCTT	P1P2	-3414	-1.71622	0.9	0.0164943	FALSE
ARF1	chr1	228267024	-	27	GTGACCAGCCAGAGGGTAGGCTTT	P1P2	-3413	0.12538	0.914815	0.107962	FALSE
ARF1	chr1	228267035	-	27	GAGGGTAGGCTTTGGGTAGGGGTC	P1P2	-3402	2.26163	1.36667	0.0244147	FALSE
ARF1	chr1	228267036	-	26	GGGTAGGCTTTGGGTAGGGGTCT	P1P2	-3401	1.24673	1.45	0.00329191	FALSE
ARF1	chr1	228267036	-	28	GAGGGTAGGCTTTGGGTAGGGGTCT	P1P2	-3401	0.422549	1.39643	0.00329191	FALSE
ARF1	chr1	228267037	-	27	GGGTAGGCTTTGGGTAGGGGTCTG	P1P2	-3400	-1.13155	1.47778	0.0152848	FALSE
ARF1	chr1	228267044	-	28	GCTTTGGGTAGGGGTCTGGGGAAGA	P1P2	-3393	-0.548304	1.81786	0.0105814	FALSE
ARF1	chr1	228267051	-	28	GTAGGGGTCTGGGGAAGAAGGAAAC	P1P2	-3386	-0.932244	2.07857	0.0260447	FALSE
ARF1	chr1	228267052	-	26	GGGGTCTGGGGAAGAAGGAAACA	P1P2	-3385	0.357078	2.15	0.501911	FALSE
ARF1	chr1	228267057	-	28	GTCTGGGGAAGAAGGAAACAGGGCC	P1P2	-3380	-0.895167	2.2	0.2594	FALSE
ARF1	chr1	228267063	-	27	GAAGAAGGAAACAGGGCCAGGCAG	P1P2	-3374	0.16555	2.23704	0.171913	FALSE
ARF1	chr1	228267063	-	28	GGAAGAAGGAAACAGGGCCAGGCAG	P1P2	-3374	0.632259	2.23571	0.171913	FALSE
ARF1	chr1	228267064	-	28	GAAGAAGGAAACAGGGCCAGGCAGA	P1P2	-3373	-0.821338	2.23929	0.102237	FALSE
ARF1	chr1	228267144	-	26	GTTCTTCCTGCCACAGGTCTTAG	P1P2	-3293	0.353922	1.08846	0.312506	FALSE
ARF1	chr1	228267144	-	28	GAGTTCTTCCTGCCACAGGTCTTAG	P1P2	-3293	0.844881	1.14643	0.312506	FALSE
ARF1	chr1	228267176	-	26	GTTTGGACTAAGCCCTGAGCGTG	P1P2	-3261	-0.879498	0.619231	0.0174221	FALSE
ARF1	chr1	228267176	-	28	GTGTTTGGACTAAGCCCTGAGCGTG	P1P2	-3261	0.265652	0.617857	0.0174221	FALSE
ARF1	chr1	228267179	-	25	GGACTAAGCCCTGAGCGTGAGG	P1P2	-3258	-1.57888	0.668	0.436997	FALSE
ARF1	chr1	228267194	-	24	GTGAGGAGGAAGTACTGACTC	P1P2	-3243	1.40416	1.06667	0.108767	FALSE
ARF1	chr1	228267194	-	26	GCGTGAGGAGGAAGTACTGACTC	P1P2	-3243	0.717757	1.03846	0.108767	FALSE
ARF1	chr1	228267194	-	28	GAGCGTGAGGAGGAAGTACTGACTC	P1P2	-3243	-1.14148	1.00714	0.108767	FALSE
ARF1	chr1	228267197	-	25	GAGGAGGAAGTACTGACTCTGG	P1P2	-3240	0.369251	1.108	0.20315	FALSE
ARF1	chr1	228267197	-	27	GTGAGGAGGAAGTACTGACTCTGG	P1P2	-3240	-0.367361	1.08148	0.20315	FALSE
ARF1	chr1	228267200	-	28	GAGGAGGAAGTACTGACTCTGGTGG	P1P2	-3237	-0.305611	1.11786	0.67451	FALSE
ARF1	chr1	228267226	-	27	GCAGCGCCACCCTGCAGAACACCC	P1P2	-3211		1.6	0.0946839	FALSE
ARF1	chr1	228267226	-	28	GGCAGCGCCACCCTGCAGAACACCC	P1P2	-3211		1.58571	0.0946839	FALSE
ARF1	chr1	228267287	-	24	GAGTCTCCCAACAGAGAGAGC	P1P2	-3150	1.20814	2.55	0.319509	FALSE
ARF1	chr1	228267304	-	22	GCGGGCAGAGCAACCATGT	P1P2	-3133	0.140071	2.18636	0.0308169	FALSE
ARF1	chr1	228267304	-	24	GAGCGGGCAGAGCAACCATGT	P1P2	-3133	2.34128	2.19583	0.0308169	FALSE
ARF1	chr1	228267304	-	26	GAGAGCGGGCAGAGCAACCATGT	P1P2	-3133	0.942744	2.21154	0.0308169	FALSE
ARF1	chr1	228267304	-	28	GAGAGAGCGGGCAGAGCAACCATGT	P1P2	-3133	-0.412682	2.22857	0.0308169	FALSE
ARF1	chr1	228267334	-	25	GAGTGGGGCAGGATATCCAGAG	P1P2	-3103	-0.217959	1.98	0.340445	FALSE
ARF1	chr1	228267358	-	25	GTGAACTCTGTCCtgggatgcc	P1P2	-3079	1.0036	1.432	0.258362	FALSE
ARF1	chr1	228267358	-	26	GGTGAACTCTGTCCtgggatgcc	P1P2	-3079	0.483405	1.44615	0.258362	FALSE
ARF1	chr1	228267358	-	28	GAGGTGAACTCTGTCCtgggatgcc	P1P2	-3079	0.128334	1.47857	0.258362	FALSE
ARF1	chr1	228267443	-	27	GCACCAAAGTGCTTGTTCCCCAag	P1P2	-2994	-2.57651	2.43704	0.194473	FALSE
ARF1	chr1	228267443	-	28	GGCACCAAAGTGCTTGTTCCCCAag	P1P2	-2994	-0.381373	2.42857	0.194473	FALSE
ARF1	chr1	228267444	-	28	GCACCAAAGTGCTTGTTCCCCAaga	P1P2	-2993	-0.263122	2.45357	0.0944085	FALSE
ARF1	chr1	228267448	-	24	GTGCTTGTTCCCCAagaggga	P1P2	-2989	-0.396055	2.6125	0.351058	FALSE
ARF1	chr1	228267452	-	26	GCTTGTTCCCCAagagggagggc	P1P2	-2985	-0.91951	2.67692	0.373147	FALSE
ARF1	chr1	228267452	-	28	GTGCTTGTTCCCCAagagggagggc	P1P2	-2985	-2.65313	2.64286	0.373147	FALSE
ARF1	chr1	228267453	-	27	GCTTGTTCCCCAagagggagggca	P1P2	-2984	2.89736	2.67778	0.346234	FALSE
ARF1	chr1	228267457	-	27	GTTCCCCAagagggagggcagggc	P1P2	-2980		2.71852	0.146038	FALSE
ARF1	chr1	228267458	-	28	GTTCCCCAagagggagggcagggct	P1P2	-2979		2.70714	0.258202	FALSE
ARF1	chr1	228267471	-	28	gagggcagggctggggaaagagtaa	P1P2	-2966	0.0737167	2.44286	0.193313	FALSE
ARF1	chr1	228267477	-	25	gctggggaaagagtaaaggtgt	P1P2	-2960	1.21513	2.192	0.193313	FALSE
ARF1	chr1	228267477	-	26	ggctggggaaagagtaaaggtgt	P1P2	-2960	-0.682977	2.21538	0.193313	FALSE
ARF1	chr1	228267477	-	27	gggctggggaaagagtaaaggtgt	P1P2	-2960	0.267947	2.23704	0.193313	FALSE
ARF1	chr1	228267493	-	24	ggtgttggcaataagcagact	P1P2	-2944	-2.24133	2.175	0.193313	FALSE
ARF1	chr1	228267494	-	22	gttggcaataagcagactt	P1P2	-2943	0.400384	2.20455	0.193313	FALSE
ARF1	chr1	228267494	-	24	gtgttggcaataagcagactt	P1P2	-2943	2.62288	2.1875	0.193313	FALSE
ARF1	chr1	228267494	-	25	ggtgttggcaataagcagactt	P1P2	-2943	-0.99873	2.18	0.193313	FALSE
ARF1	chr1	228267499	-	23	gcaataagcagacttgggca	P1P2	-2938	-0.225976	2.23478	0.193313	FALSE
ARF1	chr1	228267499	-	24	ggcaataagcagacttgggca	P1P2	-2938	0.752539	2.22917	0.193313	FALSE
ARF1	chr1	228267499	-	27	gttggcaataagcagacttgggca	P1P2	-2938	-1.94538	2.2037	0.193313	FALSE
ARF1	chr1	228267518	-	25	gcatggagtagtcaagctccag	P1P2	-2919	-0.407852	2.388	0.193313	FALSE
ARF1	chr1	228267518	-	26	ggcatggagtagtcaagctccag	P1P2	-2919	0.359994	2.38462	0.193313	FALSE
ARF1	chr1	228267518	-	27	gggcatggagtagtcaagctccag	P1P2	-2919	2.01176	2.38148	0.193313	FALSE
ARF1	chr1	228267519	-	26	gcatggagtagtcaagctccaga	P1P2	-2918	0.668745	2.40385	0.193313	FALSE
ARF1	chr1	228267519	-	27	ggcatggagtagtcaagctccaga	P1P2	-2918	0.164868	2.4	0.193313	FALSE
ARF1	chr1	228267519	-	28	gggcatggagtagtcaagctccaga	P1P2	-2918	-1.38351	2.39643	0.193313	FALSE
ARF1	chr1	228267520	-	23	ggagtagtcaagctccagag	P1P2	-2917	1.08168	2.45217	0.193313	FALSE
ARF1	chr1	228267520	-	27	gcatggagtagtcaagctccagag	P1P2	-2917	1.52623	2.41852	0.193313	FALSE
ARF1	chr1	228267520	-	28	ggcatggagtagtcaagctccagag	P1P2	-2917	0.637959	2.41429	0.193313	FALSE
ARF1	chr1	228267546	-	28	ggttccatcctagctgtgtgacatc	P1P2	-2891	-1.31608	1.95714	0.193313	FALSE
ARF1	chr1	228267576	-	25	gtgagacctctctgaacatctg	P1P2	-2861	0.602329	1.3	0.193313	FALSE
ARF1	chr1	228267576	-	27	gtgtgagacctctctgaacatctg	P1P2	-2861	-0.19251	1.28519	0.193313	FALSE
ARF1	chr1	228267581	-	26	gacctctctgaacatctgtggcc	P1P2	-2856	0.13745	1.38077	0.193313	FALSE
ARF1	chr1	228267581	-	28	gagacctctctgaacatctgtggcc	P1P2	-2856	0.403643	1.36786	0.193313	FALSE
ARF1	chr1	228267619	-	28	GCACACTTCATAGCCCTGCACTCAG	P1P2	-2818	-0.207469	2.97857	0.626887	FALSE
ARF1	chr1	228267647	-	26	GACCAAAGTGCCTGCCAGGCCTG	P1P2	-2790	-0.177399	2.16154	0.0272262	FALSE
ARF1	chr1	228267655	-	25	GCCTGCCAGGCCTGAGGTGGGC	P1P2	-2782	1.39222	2.032	0.012817	FALSE
ARF1	chr1	228267655	-	27	GTGCCTGCCAGGCCTGAGGTGGGC	P1P2	-2782	0.101643	2.04444	0.012817	FALSE
ARF1	chr1	228267656	-	26	GCCTGCCAGGCCTGAGGTGGGCT	P1P2	-2781	-0.216385	2.02308	0.0185267	FALSE
ARF1	chr1	228267656	-	28	GTGCCTGCCAGGCCTGAGGTGGGCT	P1P2	-2781	3.62016	2.03571	0.0185267	FALSE
ARF1	chr1	228267657	-	27	GCCTGCCAGGCCTGAGGTGGGCTG	P1P2	-2780	1.65216	2.01481	0.341743	FALSE
ARF1	chr1	228267680	-	25	GGTCCCCTTCACCTAGCCACAA	P1P2	-2757	-0.727733	1.808	0.213119	FALSE
ARF1	chr1	228267680	-	26	GGGTCCCCTTCACCTAGCCACAA	P1P2	-2757	0.265616	1.80769	0.213119	FALSE
ARF1	chr1	228267680	-	27	GGGGTCCCCTTCACCTAGCCACAA	P1P2	-2757	-0.159769	1.81111	0.213119	FALSE
ARF1	chr1	228267704	-	25	GCTGCCTACTAGGTCTCCCACA	P1P2	-2733	-0.162632	1.804	0.2396	FALSE
ARF1	chr1	228267704	-	26	GGCTGCCTACTAGGTCTCCCACA	P1P2	-2733	0.698977	1.81538	0.2396	FALSE
ARF1	chr1	228267705	-	23	GCCTACTAGGTCTCCCACAT	P1P2	-2732	-1.56932	1.74783	0.252827	FALSE
ARF1	chr1	228267705	-	26	GCTGCCTACTAGGTCTCCCACAT	P1P2	-2732	-1.26673	1.78846	0.252827	FALSE
ARF1	chr1	228267705	-	27	GGCTGCCTACTAGGTCTCCCACAT	P1P2	-2732	-0.706879	1.8	0.252827	FALSE
ARF1	chr1	228267765	-	27	GTCCTTCCAGCCACCTTCCCTAGG	P1P2	-2672	0.892428	1.78519	0.156375	FALSE
ARF1	chr1	228267786	-	23	GGCCAGCCCGTTCTGTTGTT	P1P2	-2651	-0.38166	2.52174	0.0653455	FALSE
ARF1	chr1	228267786	-	25	GAGGCCAGCCCGTTCTGTTGTT	P1P2	-2651	-0.371717	2.512	0.0653455	FALSE
ARF1	chr1	228267786	-	26	GGAGGCCAGCCCGTTCTGTTGTT	P1P2	-2651	-1.19329	2.50769	0.0653455	FALSE
ARF1	chr1	228267806	-	26	GTTTGGCATCCCTGTCTCTGACC	P1P2	-2631	0.137857	2.31923	0.0221919	FALSE
ARF1	chr1	228267813	-	28	GCATCCCTGTCTCTGACCTGGTTCT	P1P2	-2624	-0.903806	1.975	0.0854026	FALSE
ARF1	chr1	228267832	-	27	GTTCTCGGGTGCAGCCACCCCCAG	P1P2	-2605		0.811111	0.165556	FALSE
ARF1	chr1	228267832	-	28	GGTTCTCGGGTGCAGCCACCCCCAG	P1P2	-2605	0.138278	0.839286	0.165556	FALSE
ARF1	chr1	228267859	-	26	GAGAAGCCCAGCCCAACCTGAGC	P1P2	-2578	0.496831	0.942308	0.0278362	FALSE
ARF1	chr1	228267859	-	28	GAGAGAAGCCCAGCCCAACCTGAGC	P1P2	-2578	0.209184	0.925	0.0278362	FALSE
ARF1	chr1	228267880	-	26	GCTGGCGTCTTTGAGACTGACAA	P1P2	-2557	1.23386	1.33846	0.369855	FALSE
ARF1	chr1	228267880	-	28	GAGCTGGCGTCTTTGAGACTGACAA	P1P2	-2557	0.261952	1.31786	0.369855	FALSE
ARF1	chr1	228267883	-	25	GCGTCTTTGAGACTGACAATGG	P1P2	-2554	-3.19777	1.376	0.0664152	FALSE
ARF1	chr1	228267883	-	26	GGCGTCTTTGAGACTGACAATGG	P1P2	-2554	-0.809151	1.36923	0.0664152	FALSE
ARF1	chr1	228267886	-	26	GTCTTTGAGACTGACAATGGAGG	P1P2	-2551	-0.503661	1.37692	0.510313	FALSE
ARF1	chr1	228267886	-	28	GCGTCTTTGAGACTGACAATGGAGG	P1P2	-2551	0.637486	1.36429	0.510313	FALSE
ARF1	chr1	228267895	-	23	GACAATGGAGGCGGCCACGA	P1P2	-2542	1.85872	1.26522	0.199254	FALSE
ARF1	chr1	228267895	-	27	GACTGACAATGGAGGCGGCCACGA	P1P2	-2542	0.0168949	1.28889	0.199254	FALSE
ARF1	chr1	228267899	-	27	GACAATGGAGGCGGCCACGAAGGC	P1P2	-2538	0.439624	1.21111	0.024981	FALSE
ARF1	chr1	228267903	-	24	GAGGCGGCCACGAAGGCTGGA	P1P2	-2534	-0.448204	1.0875	0.465971	FALSE
ARF1	chr1	228267903	-	25	GGAGGCGGCCACGAAGGCTGGA	P1P2	-2534	-0.782092	1.1	0.465971	FALSE
ARF1	chr1	228267919	-	25	GCTGGAGGGTCCCTGCCCAGCC	P1P2	-2518	0.236858	0.9	0.0349871	FALSE
ARF1	chr1	228267919	-	26	GGCTGGAGGGTCCCTGCCCAGCC	P1P2	-2518	-0.122072	0.903846	0.0349871	FALSE
ARF1	chr1	228267963	-	24	GTCAGCTCATCCCACCCCTCT	P1P2	-2474	-0.0807483	0.904167	0.031132	FALSE
ARF1	chr1	228267985	-	23	GCTAAACCTCATCTGATCCC	P1P2	-2452	-0.846722	1.13043	0.329312	FALSE
ARF1	chr1	228267985	-	24	GGCTAAACCTCATCTGATCCC	P1P2	-2452	0.270497	1.125	0.329312	FALSE
ARF1	chr1	228267986	-	24	GCTAAACCTCATCTGATCCCA	P1P2	-2451	1.57302	1.125	0.639249	FALSE
ARF1	chr1	228267986	-	25	GGCTAAACCTCATCTGATCCCA	P1P2	-2451	-0.687138	1.12	0.639249	FALSE
ARF1	chr1	228268024	-	25	GAGAAAGGGATCCCTACTCCCT	P1P2	-2413	0.305849	1.028	0.134799	FALSE
ARF1	chr1	228268024	-	27	GAGAGAAAGGGATCCCTACTCCCT	P1P2	-2413	-0.739416	1.01852	0.134799	FALSE
ARF1	chr1	228268033	-	26	GATCCCTACTCCCTAGGCAGCGT	P1P2	-2404	-0.496048	0.892308	0.0209615	FALSE
ARF1	chr1	228268033	-	27	GGATCCCTACTCCCTAGGCAGCGT	P1P2	-2404	-0.791747	0.9	0.0209615	FALSE
ARF1	chr1	228268033	-	28	GGGATCCCTACTCCCTAGGCAGCGT	P1P2	-2404	-0.780925	0.907143	0.0209615	FALSE
ARF1	chr1	228268034	-	27	GATCCCTACTCCCTAGGCAGCGTT	P1P2	-2403	-0.413171	0.877778	0.0990402	FALSE
ARF1	chr1	228268034	-	28	GGATCCCTACTCCCTAGGCAGCGTT	P1P2	-2403	0.286114	0.885714	0.0990402	FALSE
ARF1	chr1	228268035	-	28	GATCCCTACTCCCTAGGCAGCGTTG	P1P2	-2402	-1.72382	0.864286	0.460909	FALSE
ARF1	chr1	228268062	-	25	GCACCTGGGCCTCAATTACCCC	P1P2	-2375	-4.73501	0.496	0.250535	FALSE
ARF1	chr1	228268062	-	27	GAGCACCTGGGCCTCAATTACCCC	P1P2	-2375	0.537147	0.488889	0.250535	FALSE
ARF1	chr1	228268062	-	28	GGAGCACCTGGGCCTCAATTACCCC	P1P2	-2375	-0.52361	0.489286	0.250535	FALSE
ARF1	chr1	228268097	-	23	GACACTTCTTAACTCCCTAG	P1P2	-2340	-0.716683	1.70435	0.336861	FALSE
ARF1	chr1	228268097	-	27	GCCTGACACTTCTTAACTCCCTAG	P1P2	-2340	-1.2267	1.6037	0.336861	FALSE
ARF1	chr1	228268098	-	24	GACACTTCTTAACTCCCTAGT	P1P2	-2339	1.67059	1.71667	0.167723	FALSE
ARF1	chr1	228268098	-	28	GCCTGACACTTCTTAACTCCCTAGT	P1P2	-2339	0.0871029	1.61786	0.167723	FALSE
ARF1	chr1	228268123	-	26	GTCTCCTTCCAGGGGCAGAAATC	P1P2	-2314	-0.395609	1.39615	0.0108419	FALSE
ARF1	chr1	228268123	-	27	GGTCTCCTTCCAGGGGCAGAAATC	P1P2	-2314	-0.050425	1.41852	0.0108419	FALSE
ARF1	chr1	228268123	-	28	GGGTCTCCTTCCAGGGGCAGAAATC	P1P2	-2314	0.729027	1.43929	0.0108419	FALSE
ARF1	chr1	228268124	-	27	GTCTCCTTCCAGGGGCAGAAATCT	P1P2	-2313	0.69513	1.38519	0.0176865	FALSE
ARF1	chr1	228268124	-	28	GGTCTCCTTCCAGGGGCAGAAATCT	P1P2	-2313	1.51653	1.40714	0.0176865	FALSE
ARF1	chr1	228268137	-	23	GAAATCTGGGTGTGACTACC	P1P2	-2300	-0.375015	1.15217	0.00440605	FALSE
ARF1	chr1	228268137	-	26	GCAGAAATCTGGGTGTGACTACC	P1P2	-2300	-1.98572	1.15769	0.00440605	FALSE
ARF1	chr1	228268137	-	27	GGCAGAAATCTGGGTGTGACTACC	P1P2	-2300	0.741908	1.16296	0.00440605	FALSE
ARF1	chr1	228268137	-	28	GGGCAGAAATCTGGGTGTGACTACC	P1P2	-2300	-0.389332	1.16786	0.00440605	FALSE
ARF1	chr1	228268138	-	24	GAAATCTGGGTGTGACTACCT	P1P2	-2299	-0.120537	1.15	0.0290841	FALSE
ARF1	chr1	228268138	-	27	GCAGAAATCTGGGTGTGACTACCT	P1P2	-2299	0.0529038	1.15556	0.0290841	FALSE
ARF1	chr1	228268138	-	28	GGCAGAAATCTGGGTGTGACTACCT	P1P2	-2299	-0.342408	1.16071	0.0290841	FALSE
ARF1	chr1	228268182	-	26	GCCTGAAGACATCATCTTTGCCC	P1P2	-2255	-0.946704	1.70385	0.302498	FALSE
ARF1	chr1	228268182	-	27	GGCCTGAAGACATCATCTTTGCCC	P1P2	-2255	-1.63981	1.69259	0.302498	FALSE
ARF1	chr1	228268185	-	25	GAAGACATCATCTTTGCCCCGG	P1P2	-2252	0.747642	1.648	0.149423	FALSE
ARF1	chr1	228268188	-	25	GACATCATCTTTGCCCCGGTGG	P1P2	-2249	0.615515	1.54	0.0937715	FALSE
ARF1	chr1	228268188	-	28	GAAGACATCATCTTTGCCCCGGTGG	P1P2	-2249	0.0713009	1.56429	0.0937715	FALSE
ARF1	chr1	228268191	-	28	GACATCATCTTTGCCCCGGTGGTGG	P1P2	-2246	1.2629	1.45357	0.0573635	FALSE
ARF1	chr1	228268206	-	25	GTGGTGGTGGGGAGCCCAAACC	P1P2	-2231	-0.3377	0.656	0.048117	FALSE
ARF1	chr1	228268206	-	26	GGTGGTGGTGGGGAGCCCAAACC	P1P2	-2231	-0.497848	0.680769	0.048117	FALSE
ARF1	chr1	228268306	-	24	gtgcagtggcacagtcctact	P1P2	-2131	0.505371	0.825	0.193313	FALSE
ARF1	chr1	228268306	-	26	gagtgcagtggcacagtcctact	P1P2	-2131	-1.45814	0.815385	0.193313	FALSE
ARF1	chr1	228268306	-	27	ggagtgcagtggcacagtcctact	P1P2	-2131	-0.118524	0.807407	0.193313	FALSE
ARF1	chr1	228268442	-	26	gtagagattatgttgcccaggct	P1P2	-1995	0.636061	0.969231	0.107394	FALSE
ARF1	chr1	228268447	-	26	gattatgttgcccaggctggGGA	P1P2	-1990	0.390471	0.873077	0.17921	FALSE
ARF1	chr1	228268447	-	28	gagattatgttgcccaggctggGGA	P1P2	-1990	1.0944	0.907143	0.17921	FALSE
ARF1	chr1	228268466	-	24	GAAGGTACatttcttaaccct	P1P2	-1971	0.805193	0.95	0.158639	FALSE
ARF1	chr1	228268466	-	25	GGAAGGTACatttcttaaccct	P1P2	-1971	0.362574	0.948	0.158639	FALSE
ARF1	chr1	228268466	-	26	gGGAAGGTACatttcttaaccct	P1P2	-1971	-0.377208	0.942308	0.158639	FALSE
ARF1	chr1	228268466	-	27	ggGGAAGGTACatttcttaaccct	P1P2	-1971	0.0747784	0.937037	0.158639	FALSE
ARF1	chr1	228268467	-	25	GAAGGTACatttcttaacccta	P1P2	-1970	1.20876	0.944	0.184014	FALSE
ARF1	chr1	228268467	-	26	GGAAGGTACatttcttaacccta	P1P2	-1970	0.165149	0.942308	0.184014	FALSE
ARF1	chr1	228268467	-	27	gGGAAGGTACatttcttaacccta	P1P2	-1970	-0.841311	0.937037	0.184014	FALSE
ARF1	chr1	228268467	-	28	ggGGAAGGTACatttcttaacccta	P1P2	-1970	1.28815	0.932143	0.184014	FALSE
ARF1	chr1	228268471	-	25	GTACatttcttaaccctagggc	P1P2	-1966	-0.387949	0.928	0.197341	FALSE
ARF1	chr1	228268471	-	26	GGTACatttcttaaccctagggc	P1P2	-1966	2.90413	0.926923	0.197341	FALSE
ARF1	chr1	228268905	-	25	GTATTTTAAAGGAAGGGGAGGC	P1P2	-1532	-0.888714	0.764	0.0951369	FALSE
ARF1	chr1	228268954	-	27	GCTCAGTGACCCTGGAGCCACCCC	P1P2	-1483	0.244718	1.67407	0.0872226	FALSE
ARF1	chr1	228268986	-	28	GCTCTGCCAGCAGAGAACCAAAGCC	P1P2	-1451	0.428838	1.97143	0.595175	FALSE
ARF1	chr1	228269006	-	26	GCCAGGTCCCTTCAGCCCTAAAG	P1P2	-1431	0.77395	1.55385	0.166359	FALSE
ARF1	chr1	228269046	-	28	GTAACCCCCGTGAAATGTCCGCACA	P1P2	-1391	0.352808	1.39286	0.0340434	FALSE
ARF1	chr1	228269057	-	28	GAAATGTCCGCACATGGCCCCGCTC	P1P2	-1380	-0.126483	1.28929	0.0362478	FALSE
ARF1	chr1	228269066	-	28	GCACATGGCCCCGCTCTGGCTGAGC	P1P2	-1371	1.33198	1.20357	0.0130057	FALSE
ARF1	chr1	228269072	-	27	GCCCCGCTCTGGCTGAGCAGGGAG	P1P2	-1365	1.2562	1.2	0.218762	FALSE
ARF1	chr1	228269072	-	28	GGCCCCGCTCTGGCTGAGCAGGGAG	P1P2	-1365	-0.030227	1.20357	0.218762	FALSE
ARF1	chr1	228269088	-	24	GGGAGAGGCAGCACAACCAGA	P1P2	-1349	0.596651	1.65417	0.594629	FALSE
ARF1	chr1	228269088	-	27	GCAGGGAGAGGCAGCACAACCAGA	P1P2	-1349	-0.353624	1.5963	0.594629	FALSE
ARF1	chr1	228269097	-	26	GCAGCACAACCAGAAGGTTCCAC	P1P2	-1340	-1.17059	1.83077	0.553065	FALSE
ARF1	chr1	228269097	-	27	GGCAGCACAACCAGAAGGTTCCAC	P1P2	-1340	0.414216	1.81481	0.553065	FALSE
ARF1	chr1	228269149	-	23	GAGTATCTGAGATGCCTGTA	P1P2	-1288	0.980098	0.769565	0.104757	FALSE
ARF1	chr1	228269152	-	24	GTATCTGAGATGCCTGTAGGG	P1P2	-1285	1.37217	0.7875	0.353075	FALSE
ARF1	chr1	228269152	-	26	GAGTATCTGAGATGCCTGTAGGG	P1P2	-1285	-0.0755466	0.792308	0.353075	FALSE
ARF1	chr1	228269153	-	25	GTATCTGAGATGCCTGTAGGGT	P1P2	-1284	0.971616	0.796	0.0276213	FALSE
ARF1	chr1	228269153	-	27	GAGTATCTGAGATGCCTGTAGGGT	P1P2	-1284	1.13203	0.8	0.0276213	FALSE
ARF1	chr1	228269200	-	27	GACAACCCTGCCACAGCTTCACAG	P1P2	-1237	0.686978	0.796296	0.77179	FALSE
ARF1	chr1	228269211	-	23	GCTTCACAGAGGTGAGATTT	P1P2	-1226	0.669405	0.930435	0.145347	FALSE
ARF1	chr1	228269215	-	27	GCTTCACAGAGGTGAGATTTCGGA	P1P2	-1222	1.61184	0.970371	0.468983	FALSE
ARF1	chr1	228269216	-	28	GCTTCACAGAGGTGAGATTTCGGAA	P1P2	-1221	1.69571	0.978572	0.779936	FALSE
ARF1	chr1	228269225	-	24	GAGATTTCGGAAGGGAGCCCC	P1P2	-1212	0.211974	1.1375	0.0241076	FALSE
ARF1	chr1	228269225	-	26	GTGAGATTTCGGAAGGGAGCCCC	P1P2	-1212	-0.600619	1.11923	0.0241076	FALSE
ARF1	chr1	228269225	-	27	GGTGAGATTTCGGAAGGGAGCCCC	P1P2	-1212	0.45711	1.11111	0.0241076	FALSE
ARF1	chr1	228269235	-	25	GAAGGGAGCCCCAGGCAGAAAA	P1P2	-1202	1.86724	1.152	0.049909	FALSE
ARF1	chr1	228269235	-	26	GGAAGGGAGCCCCAGGCAGAAAA	P1P2	-1202	1.23868	1.15	0.049909	FALSE
ARF1	chr1	228269236	-	26	GAAGGGAGCCCCAGGCAGAAAAA	P1P2	-1201	1.11264	1.15	0.50163	FALSE
ARF1	chr1	228269236	-	27	GGAAGGGAGCCCCAGGCAGAAAAA	P1P2	-1201	1.14575	1.14815	0.50163	FALSE
ARF1	chr1	228269248	-	24	GCAGAAAAAGGGACTAAATTT	P1P2	-1189	1.41475	1.17083	0.0272747	FALSE
ARF1	chr1	228269248	-	25	GGCAGAAAAAGGGACTAAATTT	P1P2	-1189	1.46239	1.168	0.0272747	FALSE
ARF1	chr1	228269249	-	25	GCAGAAAAAGGGACTAAATTTG	P1P2	-1188	3.81228	1.176	0.0278163	FALSE
ARF1	chr1	228269249	-	26	GGCAGAAAAAGGGACTAAATTTG	P1P2	-1188	0.505012	1.17308	0.0278163	FALSE
ARF1	chr1	228269250	-	26	GCAGAAAAAGGGACTAAATTTGG	P1P2	-1187	-0.582526	1.18462	0.102442	FALSE
ARF1	chr1	228269250	-	27	GGCAGAAAAAGGGACTAAATTTGG	P1P2	-1187	-1.33852	1.18148	0.102442	FALSE
ARF1	chr1	228269254	-	27	GAAAAAGGGACTAAATTTGGGGGC	P1P2	-1183	0.709053	1.22593	0.0524548	FALSE
ARF1	chr1	228269271	-	23	GGCAGGAGGGTCACCGCTTT	P1P2	-1166	-1.35452	1.1913	0.00115823	FALSE
ARF1	chr1	228269271	-	24	GGGCAGGAGGGTCACCGCTTT	P1P2	-1166	-0.447125	1.19583	0.00115823	FALSE
ARF1	chr1	228269271	-	25	GGGGCAGGAGGGTCACCGCTTT	P1P2	-1166	0.765119	1.2	0.00115823	FALSE
ARF1	chr1	228269271	-	26	GGGGGCAGGAGGGTCACCGCTTT	P1P2	-1166	1.06857	1.20385	0.00115823	FALSE
ARF1	chr1	228269272	-	23	GCAGGAGGGTCACCGCTTTT	P1P2	-1165	0.107966	1.17391	0.0276298	FALSE
ARF1	chr1	228269272	-	24	GGCAGGAGGGTCACCGCTTTT	P1P2	-1165	1.51007	1.17917	0.0276298	FALSE
ARF1	chr1	228269272	-	25	GGGCAGGAGGGTCACCGCTTTT	P1P2	-1165	-0.777758	1.184	0.0276298	FALSE
ARF1	chr1	228269272	-	26	GGGGCAGGAGGGTCACCGCTTTT	P1P2	-1165	0.721335	1.18846	0.0276298	FALSE
ARF1	chr1	228269272	-	27	GGGGGCAGGAGGGTCACCGCTTTT	P1P2	-1165	0.493516	1.19259	0.0276298	FALSE
ARF1	chr1	228269273	-	27	GGGGCAGGAGGGTCACCGCTTTTG	P1P2	-1164	-0.129095	1.17407	0.0237991	FALSE
ARF1	chr1	228269273	-	28	GGGGGCAGGAGGGTCACCGCTTTTG	P1P2	-1164	0.822416	1.17857	0.0237991	FALSE
ARF1	chr1	228269293	-	23	GGGACCTTCGTAGCCCCCGC	P1P2	-1144	0.269491	0.726087	0.347054	FALSE
ARF1	chr1	228269293	-	24	GGGGACCTTCGTAGCCCCCGC	P1P2	-1144	0.958774	0.733333	0.347054	FALSE
ARF1	chr1	228269304	-	25	GTAGCCCCCGCAGGTGCAGCCC	P1P2	-1133	-0.0772629	0.772	0.00663124	FALSE
ARF1	chr1	228269305	-	26	GTAGCCCCCGCAGGTGCAGCCCT	P1P2	-1132	0.334951	0.784615	0.0199002	FALSE
ARF1	chr1	228269306	-	27	GTAGCCCCCGCAGGTGCAGCCCTG	P1P2	-1131	1.06588	0.8	0.0782823	FALSE
ARF1	chr1	228269307	-	28	GTAGCCCCCGCAGGTGCAGCCCTGG	P1P2	-1130	0.800374	0.814286	0.0272491	FALSE
ARF1	chr1	228269359	-	27	GAGGCAGTGAGGACGCCCTGCCCA	P1P2	-1078	-0.935741	0.37037	0.0534124	FALSE
ARF1	chr1	228269360	-	28	GAGGCAGTGAGGACGCCCTGCCCAA	P1P2	-1077	0.219932	0.367857	0.308184	FALSE
ARF1	chr1	228269361	-	26	GCAGTGAGGACGCCCTGCCCAAG	P1P2	-1076	1.35052	0.35	0.196367	FALSE
ARF1	chr1	228269361	-	27	GGCAGTGAGGACGCCCTGCCCAAG	P1P2	-1076	-0.270605	0.355556	0.196367	FALSE
ARF1	chr1	228269374	-	23	GCCCAAGGGGCAAGCAACGT	P1P2	-1063	-0.299039	0.295652	0.0606058	FALSE
ARF1	chr1	228269374	-	28	GCCCTGCCCAAGGGGCAAGCAACGT	P1P2	-1063	0.396769	0.310714	0.0606058	FALSE
ARF1	chr1	228269380	-	22	GGGCAAGCAACGTAGGTGA	P1P2	-1057	-0.194664	0.227273	0.0633649	FALSE
ARF1	chr1	228269380	-	23	GGGGCAAGCAACGTAGGTGA	P1P2	-1057	-0.377944	0.230435	0.0633649	FALSE
ARF1	chr1	228269381	-	24	GGGGCAAGCAACGTAGGTGAT	P1P2	-1056	-0.422911	0.225	0.0894007	FALSE
ARF1	chr1	228269382	-	23	GGCAAGCAACGTAGGTGATG	P1P2	-1055	-0.133046	0.213043	0.0236018	FALSE
ARF1	chr1	228269382	-	24	GGGCAAGCAACGTAGGTGATG	P1P2	-1055	-1.70923	0.216667	0.0236018	FALSE
ARF1	chr1	228269382	-	25	GGGGCAAGCAACGTAGGTGATG	P1P2	-1055	0.6098	0.22	0.0236018	FALSE
ARF1	chr1	228269383	-	24	GGCAAGCAACGTAGGTGATGG	P1P2	-1054	-0.281505	0.208333	0.370574	FALSE
ARF1	chr1	228269383	-	25	GGGCAAGCAACGTAGGTGATGG	P1P2	-1054	-0.562272	0.212	0.370574	FALSE
ARF1	chr1	228269383	-	26	GGGGCAAGCAACGTAGGTGATGG	P1P2	-1054	0.546537	0.215385	0.370574	FALSE
ARF1	chr1	228269392	-	28	GCAACGTAGGTGATGGGGGCAGCAA	P1P2	-1045	-0.864499	0.189286	0.122773	FALSE
ARF1	chr1	228269393	-	24	GTAGGTGATGGGGGCAGCAAA	P1P2	-1044	-0.681972	0.179167	0.248487	FALSE
ARF1	chr1	228269394	-	25	GTAGGTGATGGGGGCAGCAAAG	P1P2	-1043	0.353866	0.184	0.154288	FALSE
ARF1	chr1	228269400	-	25	GATGGGGGCAGCAAAGGGGCGC	P1P2	-1037	0.217641	0.228	0.0219494	FALSE
ARF1	chr1	228269400	-	27	GTGATGGGGGCAGCAAAGGGGCGC	P1P2	-1037	2.20581	0.225926	0.0219494	FALSE
ARF1	chr1	228269400	-	28	GGTGATGGGGGCAGCAAAGGGGCGC	P1P2	-1037	0.635919	0.225	0.0219494	FALSE
ARF1	chr1	228269403	-	28	GATGGGGGCAGCAAAGGGGCGCAGG	P1P2	-1034	-0.177922	0.257143	0.0651527	FALSE
ARF1	chr1	228269408	-	26	GCAGCAAAGGGGCGCAGGAGGCC	P1P2	-1029	-0.498037	0.35	0.011184	FALSE
ARF1	chr1	228269408	-	27	GGCAGCAAAGGGGCGCAGGAGGCC	P1P2	-1029	-0.254271	0.340741	0.011184	FALSE
ARF1	chr1	228269408	-	28	GGGCAGCAAAGGGGCGCAGGAGGCC	P1P2	-1029	0.109065	0.332143	0.011184	FALSE
ARF1	chr1	228269409	-	24	GCAAAGGGGCGCAGGAGGCCT	P1P2	-1028	-0.108482	0.3875	0.0353666	FALSE
ARF1	chr1	228269409	-	27	GCAGCAAAGGGGCGCAGGAGGCCT	P1P2	-1028	0.326685	0.359259	0.0353666	FALSE
ARF1	chr1	228269409	-	28	GGCAGCAAAGGGGCGCAGGAGGCCT	P1P2	-1028	0.157163	0.35	0.0353666	FALSE
ARF1	chr1	228269436	-	23	GCCCAGTGATCCCACCCCTC	P1P2	-1001	0.351206	0.482609	0.0837516	FALSE
ARF1	chr1	228269436	-	24	GGCCCAGTGATCCCACCCCTC	P1P2	-1001	0.556038	0.4875	0.0837516	FALSE
ARF1	chr1	228269436	-	28	GCCAGGCCCAGTGATCCCACCCCTC	P1P2	-1001	-0.159618	0.503571	0.0837516	FALSE
ARF1	chr1	228269448	-	28	GATCCCACCCCTCAGGCCCTGCCCC	P1P2	-989	-0.207493	0.317857	0.0387476	FALSE
ARF1	chr1	228269470	-	23	GGCCTCGGCCTGCACAAATC	P1P2	-967	0.00834279	0.0913044	0.117247	FALSE
ARF1	chr1	228269470	-	24	GGGCCTCGGCCTGCACAAATC	P1P2	-967	-0.217037	0.0916667	0.117247	FALSE
ARF1	chr1	228269498	-	26	GATTCCCGACCTCCACAATACCC	P1P2	-939	-0.194165	0.561538	0.141573	FALSE
ARF1	chr1	228269499	-	27	GATTCCCGACCTCCACAATACCCA	P1P2	-938	0.540276	0.57037	0.665268	FALSE
ARF1	chr1	228269554	-	26	GCCCAACCCCTCACAGCAGCACA	P1P2	-883	0.859082	1.25769	0.0893755	FALSE
ARF1	chr1	228269555	-	27	GCCCAACCCCTCACAGCAGCACAA	P1P2	-882	0.729799	1.24815	0.824132	FALSE
ARF1	chr1	228269577	-	24	GGAAGAGGCAAGAAGACCTGA	P1P2	-860	-0.559343	0.6875	0.679876	FALSE
ARF1	chr1	228269577	-	25	GGGAAGAGGCAAGAAGACCTGA	P1P2	-860	-1.91682	0.704	0.679876	FALSE
ARF1	chr1	228269580	-	27	GGAAGAGGCAAGAAGACCTGAGGG	P1P2	-857	-0.161181	0.655555	0.15882	FALSE
ARF1	chr1	228269580	-	28	GGGAAGAGGCAAGAAGACCTGAGGG	P1P2	-857	0.332202	0.671429	0.15882	FALSE
ARF1	chr1	228269583	-	26	GAGGCAAGAAGACCTGAGGGTGG	P1P2	-854	1.52054	0.573077	0.082081	FALSE
ARF1	chr1	228269594	-	27	GACCTGAGGGTGGTGGGCAGAGCC	P1P2	-843	2.01246	0.455556	0.0317048	FALSE
ARF1	chr1	228269608	-	27	GGGCAGAGCCAGGCCTCCAGCACA	P1P2	-829	0.335998	0.488889	0.113342	FALSE
ARF1	chr1	228269618	-	26	GGCCTCCAGCACACGGAACACAG	P1P2	-819	-1.10182	0.630769	0.194097	FALSE
ARF1	chr1	228269619	-	26	GCCTCCAGCACACGGAACACAGA	P1P2	-818	-0.340352	0.646154	0.416446	FALSE
ARF1	chr1	228269619	-	27	GGCCTCCAGCACACGGAACACAGA	P1P2	-818	0.19989	0.640741	0.416446	FALSE
ARF1	chr1	228269642	-	24	GACTGCAACGGTCCTCTGTTC	P1P2	-795	1.51739	1.15833	0.0496579	FALSE
ARF1	chr1	228269642	-	25	GGACTGCAACGGTCCTCTGTTC	P1P2	-795	-0.265079	1.148	0.0496579	FALSE
ARF1	chr1	228269642	-	26	GGGACTGCAACGGTCCTCTGTTC	P1P2	-795	1.19383	1.13462	0.0496579	FALSE
ARF1	chr1	228269642	-	28	GAGGGACTGCAACGGTCCTCTGTTC	P1P2	-795	0.371641	1.11071	0.0496579	FALSE
ARF1	chr1	228269655	-	27	GTCCTCTGTTCAGGTGCCTGAGAG	P1P2	-782	1.12991	1.15926	0.310631	FALSE
ARF1	chr1	228269655	-	28	GGTCCTCTGTTCAGGTGCCTGAGAG	P1P2	-782	-1.00198	1.15714	0.310631	FALSE
ARF1	chr1	228269656	-	28	GTCCTCTGTTCAGGTGCCTGAGAGC	P1P2	-781	1.05274	1.14286	0.0419991	FALSE
ARF1	chr1	228269676	-	25	GCGGGATCTCCTCCGCCTCAAC	P1P2	-761	-0.432405	0.364	0.0638111	FALSE
ARF1	chr1	228269676	-	27	GAGCGGGATCTCCTCCGCCTCAAC	P1P2	-761	0.979001	0.411111	0.0638111	FALSE
ARF1	chr1	228269691	-	26	GCCTCAACTGGATCTCAGCTTAA	P1P2	-746	-0.734032	0.107692	0.15075	FALSE
ARF1	chr1	228269728	-	26	GAGACCACTGTGACCTCCCTTCT	P1P2	-709	3.0648	0.0653846	0.00969765	FALSE
ARF1	chr1	228269731	-	27	GACCACTGTGACCTCCCTTCTGGG	P1P2	-706	0.0918606	0.0555556	0.838162	FALSE
ARF1	chr1	228269789	-	28	GCCCCCGCCTCACCCCGGGGTCCCC	P1P2	-648	0.175262	0	0.0294485	FALSE
ARF1	chr1	228269816	-	28	GCCACCTCCTCCTTTGCTTCATCTG	P1P2	-621	0.269151	0	0.0998271	FALSE
ARF1	chr1	228269840	-	25	GCCAGCTCCCCGGCGTCTGCTC	P1P2	-597	1.76206	0	0.0182886	FALSE
ARF1	chr1	228269840	-	26	GGCCAGCTCCCCGGCGTCTGCTC	P1P2	-597	1.87297	0	0.0182886	FALSE
ARF1	chr1	228269840	-	28	GCGGCCAGCTCCCCGGCGTCTGCTC	P1P2	-597	2.2638	0	0.0182886	FALSE
ARF1	chr1	228269841	-	22	GCTCCCCGGCGTCTGCTCC	P1P2	-596	0.115005	0	0.00438177	FALSE
ARF1	chr1	228269841	-	26	GCCAGCTCCCCGGCGTCTGCTCC	P1P2	-596	0.612638	0	0.00438177	FALSE
ARF1	chr1	228269841	-	27	GGCCAGCTCCCCGGCGTCTGCTCC	P1P2	-596	1.11496	0	0.00438177	FALSE
ARF1	chr1	228269847	-	28	GCTCCCCGGCGTCTGCTCCGGGCCC	P1P2	-590	2.24651	0	0.0161645	FALSE
ARF1	chr1	228269870	-	24	GTATGAGCCCGCGCGTCACTG	P1P2	-567	-0.0761552	0	0.522053	FALSE
ARF1	chr1	228269870	-	25	GGTATGAGCCCGCGCGTCACTG	P1P2	-567	-0.759029	0	0.522053	FALSE
ARF1	chr1	228269877	-	25	GCCCGCGCGTCACTGCGGCCGC	P1P2	-560	1.7834	0	0.0291313	FALSE
ARF1	chr1	228269877	-	27	GAGCCCGCGCGTCACTGCGGCCGC	P1P2	-560	-0.721105	0	0.0291313	FALSE
ARF1	chr1	228269878	-	26	GCCCGCGCGTCACTGCGGCCGCC	P1P2	-559	0.771863	0	0.0656395	FALSE
ARF1	chr1	228269878	-	28	GAGCCCGCGCGTCACTGCGGCCGCC	P1P2	-559	0.658439	0	0.0656395	FALSE
ARF1	chr1	228269879	-	27	GCCCGCGCGTCACTGCGGCCGCCG	P1P2	-558	0.087573	0	0.349867	FALSE
ARF1	chr1	228269887	-	27	GTCACTGCGGCCGCCGGGGCGCCG	P1P2	-550	0.728887	0	0.282062	FALSE
ARF1	chr1	228269896	-	27	GCCGCCGGGGCGCCGAGGCCAGTG	P1P2	-541	0.834192	0	0.0397758	FALSE
ARF1	chr1	228269896	-	28	GGCCGCCGGGGCGCCGAGGCCAGTG	P1P2	-541	-0.413485	0	0.0397758	FALSE
ARF1	chr1	228269897	-	28	GCCGCCGGGGCGCCGAGGCCAGTGC	P1P2	-540	-0.0376015	0	0.0253115	FALSE
ARF1	chr1	228269898	-	26	GCCGGGGCGCCGAGGCCAGTGCG	P1P2	-539	-0.0959305	0	0.256424	FALSE
ARF1	chr1	228269922	-	25	GACACAGCAAGCCTCCCGCCTT	P1P2	-515	-0.646841	0	0.0193082	FALSE
ARF1	chr1	228269922	-	26	GGACACAGCAAGCCTCCCGCCTT	P1P2	-515	0.20193	0	0.0193082	FALSE
ARF1	chr1	228269922	-	27	GGGACACAGCAAGCCTCCCGCCTT	P1P2	-515	0.721262	0	0.0193082	FALSE
ARF1	chr1	228269922	-	28	GGGGACACAGCAAGCCTCCCGCCTT	P1P2	-515	-0.153045	0	0.0193082	FALSE
ARF1	chr1	228269954	-	22	GTGGCCCCGCGAGTGCCAC	P1P2	-483	0.787166	0	0.0478581	FALSE
ARF1	chr1	228269954	-	25	GCCGTGGCCCCGCGAGTGCCAC	P1P2	-483	0.764509	0	0.0478581	FALSE
ARF1	chr1	228269964	-	24	GCGAGTGCCACAGGTTTCCAC	P1P2	-473	-0.0550162	0	0.150311	FALSE
ARF1	chr1	228269965	-	25	GCGAGTGCCACAGGTTTCCACA	P1P2	-472	0.519838	0	0.849367	FALSE
ARF1	chr1	228269969	-	25	GTGCCACAGGTTTCCACAGGGC	P1P2	-468	0.00917716	0	0.117384	FALSE
ARF1	chr1	228269969	-	27	GAGTGCCACAGGTTTCCACAGGGC	P1P2	-468	0.326536	0	0.117384	FALSE
ARF1	chr1	228269970	-	26	GTGCCACAGGTTTCCACAGGGCC	P1P2	-467	2.06436	0	0.0148462	FALSE
ARF1	chr1	228269970	-	28	GAGTGCCACAGGTTTCCACAGGGCC	P1P2	-467	1.86086	0	0.0148462	FALSE
ARF1	chr1	228269971	-	25	GCCACAGGTTTCCACAGGGCCG	P1P2	-466	1.808	0	0.321094	FALSE
ARF1	chr1	228269971	-	27	GTGCCACAGGTTTCCACAGGGCCG	P1P2	-466	0.893582	0	0.321094	FALSE
ARF1	chr1	228269978	-	25	GTTTCCACAGGGCCGGGGCACG	P1P2	-459	0.85281	0	0.0055986	FALSE
ARF1	chr1	228269978	-	26	GGTTTCCACAGGGCCGGGGCACG	P1P2	-459	0.57384	0	0.0055986	FALSE
ARF1	chr1	228269993	-	25	GGGCACGTGGACCCGCGCAGCC	P1P2	-444	-0.017011	0	0.0903595	FALSE
ARF1	chr1	228269993	-	26	GGGGCACGTGGACCCGCGCAGCC	P1P2	-444	-0.497432	0	0.0903595	FALSE
ARF1	chr1	228269994	-	24	GCACGTGGACCCGCGCAGCCT	P1P2	-443	-0.543785	0	0.0289836	FALSE
ARF1	chr1	228269994	-	25	GGCACGTGGACCCGCGCAGCCT	P1P2	-443	0.671696	0	0.0289836	FALSE
ARF1	chr1	228269994	-	26	GGGCACGTGGACCCGCGCAGCCT	P1P2	-443	-0.333202	0	0.0289836	FALSE
ARF1	chr1	228269994	-	27	GGGGCACGTGGACCCGCGCAGCCT	P1P2	-443	-0.463661	0	0.0289836	FALSE
ARF1	chr1	228270001	-	25	GGACCCGCGCAGCCTGGGAGCC	P1P2	-436	0.250443	0	0.00493813	FALSE
ARF1	chr1	228270001	-	27	GTGGACCCGCGCAGCCTGGGAGCC	P1P2	-436	1.75517	0	0.00493813	FALSE
ARF1	chr1	228270015	-	24	GGGAGCCAGGAACCCCAACCC	P1P2	-422	0.35754	0	0.129969	FALSE
ARF1	chr1	228270015	-	28	GCCTGGGAGCCAGGAACCCCAACCC	P1P2	-422	1.68815	0	0.129969	FALSE
ARF1	chr1	228270020	-	25	GCCAGGAACCCCAACCCCGGCG	P1P2	-417	2.51536	0	0.120065	FALSE
ARF1	chr1	228270020	-	27	GAGCCAGGAACCCCAACCCCGGCG	P1P2	-417	3.39216	0	0.120065	FALSE
ARF1	chr1	228270020	-	28	GGAGCCAGGAACCCCAACCCCGGCG	P1P2	-417	2.90913	0	0.120065	FALSE
ARF1	chr1	228270021	-	26	GCCAGGAACCCCAACCCCGGCGA	P1P2	-416	0.993139	0	0.20639	FALSE
ARF1	chr1	228270021	-	28	GAGCCAGGAACCCCAACCCCGGCGA	P1P2	-416	2.22521	0	0.20639	FALSE
ARF1	chr1	228270022	-	23	GGAACCCCAACCCCGGCGAG	P1P2	-415	5.04119	0	0.316037	FALSE
ARF1	chr1	228270022	-	27	GCCAGGAACCCCAACCCCGGCGAG	P1P2	-415	0.731645	0	0.316037	FALSE
ARF1	chr1	228270075	-	28	GTCCCCGAGGCCTCCCGGTGACTGC	P1P2	-362	0.372684	0.646429	0.232846	FALSE
ARF1	chr1	228270081	-	25	GCCTCCCGGTGACTGCCGGGTG	P1P2	-356	-2.33825	0.74	0.00638787	FALSE
ARF1	chr1	228270081	-	26	GGCCTCCCGGTGACTGCCGGGTG	P1P2	-356	2.21082	0.734615	0.00638787	FALSE
ARF1	chr1	228270081	-	28	GAGGCCTCCCGGTGACTGCCGGGTG	P1P2	-356	0.35909	0.717857	0.00638787	FALSE
ARF1	chr1	228270082	-	26	GCCTCCCGGTGACTGCCGGGTGT	P1P2	-355	-0.392731	0.734615	0.0387695	FALSE
ARF1	chr1	228270082	-	27	GGCCTCCCGGTGACTGCCGGGTGT	P1P2	-355	-0.716692	0.72963	0.0387695	FALSE
ARF1	chr1	228270092	-	26	GACTGCCGGGTGTGGGAGGAGGA	P1P2	-345	-0.14	0.615385	0.0271384	FALSE
ARF1	chr1	228270092	-	28	GTGACTGCCGGGTGTGGGAGGAGGA	P1P2	-345	0.3711	0.628571	0.0271384	FALSE
ARF1	chr1	228270126	-	25	GCCCCGCAGCTCCAGTTGCTGC	P1P2	-311	-1.03036	0.104	0.0516856	FALSE
ARF1	chr1	228270163	-	27	GCCTCAGTCTCCAAATACGCCAAA	P1P2	-274	-1.2776	0.0777778	0.603586	FALSE
ARF1	chr1	228270163	-	28	GGCCTCAGTCTCCAAATACGCCAAA	P1P2	-274	1.33509	0.075	0.603586	FALSE
ARF1	chr1	228270164	-	28	GCCTCAGTCTCCAAATACGCCAAAC	P1P2	-273	0.116247	0.0785714	0.0934129	FALSE
ARF1	chr1	228270167	-	25	GTCTCCAAATACGCCAAACGGG	P1P2	-270		0.1	0.76577	FALSE
ARF1	chr1	228270168	-	26	GTCTCCAAATACGCCAAACGGGC	P1P2	-269	1.48551	0.1	0.0353816	FALSE
ARF1	chr1	228270181	-	27	GCCAAACGGGCGGGAGTGAGCCAC	P1P2	-256	0.72596	0.0592593	0.0206582	FALSE
ARF1	chr1	228270193	-	26	GAGTGAGCCACAGGCTGTCTTCG	P1P2	-244	0.192491	0.0115385	0.244063	FALSE
ARF1	chr1	228270193	-	27	GGAGTGAGCCACAGGCTGTCTTCG	P1P2	-244	1.44587	0.0148148	0.244063	FALSE
ARF1	chr1	228270193	-	28	GGGAGTGAGCCACAGGCTGTCTTCG	P1P2	-244	0.162581	0.0178571	0.244063	FALSE
ARF1	chr1	228270205	-	25	GCTGTCTTCGCGGAAGACTCAC	P1P2	-232	0.645972	0	0.251307	FALSE
ARF1	chr1	228270205	-	26	GGCTGTCTTCGCGGAAGACTCAC	P1P2	-232	1.97356	0	0.251307	FALSE
ARF1	chr1	228270211	-	28	GTCTTCGCGGAAGACTCACAGGCGC	P1P2	-226	8.45311e-05	0	0.102988	FALSE
ARF1	chr1	228270220	-	25	GACTCACAGGCGCAGGCGCAGA	P1P2	-217	1.4111	0	0.0575662	FALSE
ARF1	chr1	228270220	-	28	GAAGACTCACAGGCGCAGGCGCAGA	P1P2	-217	3.37432	0	0.0575662	FALSE
ARF1	chr1	228270221	-	26	GACTCACAGGCGCAGGCGCAGAC	P1P2	-216	-0.483625	0	0.148462	FALSE
ARF1	chr1	228270235	-	23	GCAGACGGGTGCGCGCCCCT	P1P2	-202	0.232789	0	0.0568656	FALSE
ARF1	chr1	228270235	-	25	GCGCAGACGGGTGCGCGCCCCT	P1P2	-202	-0.437362	0	0.0568656	FALSE
ARF1	chr1	228270235	-	26	GGCGCAGACGGGTGCGCGCCCCT	P1P2	-202	0.154642	0	0.0568656	FALSE
ARF1	chr1	228270236	-	24	GCAGACGGGTGCGCGCCCCTA	P1P2	-201	1.25634	0	0.139411	FALSE
ARF1	chr1	228270236	-	26	GCGCAGACGGGTGCGCGCCCCTA	P1P2	-201	-1.58949	0	0.139411	FALSE
ARF1	chr1	228270236	-	27	GGCGCAGACGGGTGCGCGCCCCTA	P1P2	-201	-0.311629	0	0.139411	FALSE
ARF1	chr1	228270258	-	23	GTGCGCGCGAGCTAAGACCG	P1P2	-179	-0.125083	0	0.838789	FALSE
ARF1	chr1	228270258	-	24	GGTGCGCGCGAGCTAAGACCG	P1P2	-179	-0.538937	0	0.838789	FALSE
ARF1	chr1	228270258	-	25	GGGTGCGCGCGAGCTAAGACCG	P1P2	-179	0.432826	0	0.838789	FALSE
ARF1	chr1	228270263	-	24	GCGCGAGCTAAGACCGCGGCC	P1P2	-174	-1.22532	0	0.115358	FALSE
ARF1	chr1	228270263	-	26	GCGCGCGAGCTAAGACCGCGGCC	P1P2	-174	-0.63118	0	0.115358	FALSE
ARF1	chr1	228270263	-	28	GTGCGCGCGAGCTAAGACCGCGGCC	P1P2	-174	0.305083	0	0.115358	FALSE
ARF1	chr1	228270264	-	25	GCGCGAGCTAAGACCGCGGCCC	P1P2	-173	0.718827	0	0.0622695	FALSE
ARF1	chr1	228270264	-	27	GCGCGCGAGCTAAGACCGCGGCCC	P1P2	-173	-0.105345	0	0.0622695	FALSE
ARF1	chr1	228270265	-	26	GCGCGAGCTAAGACCGCGGCCCG	P1P2	-172	0.402996	0	0.237663	FALSE
ARF1	chr1	228270265	-	28	GCGCGCGAGCTAAGACCGCGGCCCG	P1P2	-172	2.59099	0	0.237663	FALSE
ARF1	chr1	228270269	-	26	GAGCTAAGACCGCGGCCCGGGGC	P1P2	-168	0.876587	0	0.0307953	FALSE
ARF1	chr1	228270269	-	28	GCGAGCTAAGACCGCGGCCCGGGGC	P1P2	-168	-0.0181528	0	0.0307953	FALSE
ARF1	chr1	228270270	-	27	GAGCTAAGACCGCGGCCCGGGGCA	P1P2	-167	1.26635	0	0.0996748	FALSE
ARF1	chr1	228270303	-	25	GCCCCGCCCCCTGCAGCCCTAC	P1P2	-134		0	0.0515215	FALSE
ARF1	chr1	228270303	-	26	GGCCCCGCCCCCTGCAGCCCTAC	P1P2	-134		0	0.0515215	FALSE
ARF1	chr1	228270325	-	24	GGAGCCAGCGCGCCTGCGTCG	P1P2	-112	0.863649	0	0.403201	FALSE
ARF1	chr1	228270326	-	22	GCCAGCGCGCCTGCGTCGC	P1P2	-111	-0.410162	0	0.00592007	FALSE
ARF1	chr1	228270326	-	24	GAGCCAGCGCGCCTGCGTCGC	P1P2	-111	1.36012	0	0.00592007	FALSE
ARF1	chr1	228270326	-	25	GGAGCCAGCGCGCCTGCGTCGC	P1P2	-111	-0.0847022	0	0.00592007	FALSE
ARF1	chr1	228270333	-	25	GCGCGCCTGCGTCGCGGGCGCA	P1P2	-104	1.50155	0	0.203457	FALSE
ARF1	chr1	228270336	-	24	GCCTGCGTCGCGGGCGCACGG	P1P2	-101	-0.883719	0	0.214512	FALSE
ARF1	chr1	228270336	-	26	GCGCCTGCGTCGCGGGCGCACGG	P1P2	-101	0.805757	0	0.214512	FALSE
ARF1	chr1	228270336	-	28	GCGCGCCTGCGTCGCGGGCGCACGG	P1P2	-101	1.25804	0	0.214512	FALSE
ARF1	chr1	228270337	-	25	GCCTGCGTCGCGGGCGCACGGT	P1P2	-100	-0.843078	0	0.0648311	FALSE
ARF1	chr1	228270337	-	27	GCGCCTGCGTCGCGGGCGCACGGT	P1P2	-100	0.969046	0	0.0648311	FALSE
ARF1	chr1	228270340	-	28	GCCTGCGTCGCGGGCGCACGGTGGG	P1P2	-97	0.147493	0	0.0485839	FALSE
ARF1	chr1	228270349	-	24	GCGCACGGTGGGCGGAGTTCC	P1P2	-88	-0.257621	0	0.00735849	FALSE
ARF1	chr1	228270349	-	25	GGCGCACGGTGGGCGGAGTTCC	P1P2	-88	-0.203633	0	0.00735849	FALSE
ARF1	chr1	228270349	-	26	GGGCGCACGGTGGGCGGAGTTCC	P1P2	-88	-0.0525852	0	0.00735849	FALSE
ARF1	chr1	228270349	-	28	GCGGGCGCACGGTGGGCGGAGTTCC	P1P2	-88	0.408585	0	0.00735849	FALSE
ARF1	chr1	228270369	-	28	GTTCCCGGCGTCTCCGCCCCTTACC	P1P2	-68	1.93552	0	0.157015	FALSE
ARF1	chr1	228270399	-	27	GCCCCGCGCCCGGAGGCGCTGACG	P1P2	-38	1.88118	0	0.0162514	FALSE
ARF1	chr1	228270425	-	27	GCCGCCGTCAGAGCCGCCATCTTG	P1P2	-12	1.13977	0	0.0597362	FALSE
ARF1	chr1	228270425	-	28	GGCCGCCGTCAGAGCCGCCATCTTG	P1P2	-12	2.02382	0	0.0597362	FALSE
ARF1	chr1	228270426	-	28	GCCGCCGTCAGAGCCGCCATCTTGT	P1P2	-11	1.46542	0	0.304019	FALSE
ARF1	chr1	228270444	-	23	GTGGGAGCAAAACCAACGCC	P1P2	7	1.73853	0	0.24475	FALSE
ARF1	chr1	228270449	-	25	GGAGCAAAACCAACGCCTGGCT	P1P2	12	1.3629	0	0.0593783	FALSE
ARF1	chr1	228270449	-	26	GGGAGCAAAACCAACGCCTGGCT	P1P2	12	-0.4421	0	0.0593783	FALSE
ARF1	chr1	228270449	-	28	GTGGGAGCAAAACCAACGCCTGGCT	P1P2	12	0.706484	0	0.0593783	FALSE
ARF1	chr1	228270471	-	24	GGAGCAGCAGCCTCTGAGGTG	P1P2	34	1.34335	0	0.0975416	FALSE
ARF1	chr1	228270471	-	28	GCTCGGAGCAGCAGCCTCTGAGGTG	P1P2	34	1.51437	0	0.0975416	FALSE
ARF1	chr1	228270472	-	25	GGAGCAGCAGCCTCTGAGGTGA	P1P2	35	2.37596	0	0.146058	FALSE
ARF1	chr1	228270477	-	24	GCAGCCTCTGAGGTGAGGGCG	P1P2	40	2.90945	0.00416667	0.0611935	FALSE
ARF1	chr1	228270477	-	27	GCAGCAGCCTCTGAGGTGAGGGCG	P1P2	40	-0.181308	0.0037037	0.0611935	FALSE
ARF1	chr1	228270478	-	25	GCAGCCTCTGAGGTGAGGGCGA	P1P2	41	0.951221	0.008	0.158962	FALSE
ARF1	chr1	228270478	-	28	GCAGCAGCCTCTGAGGTGAGGGCGA	P1P2	41	0.616121	0.00714286	0.158962	FALSE
ARF1	chr1	228270479	-	26	GCAGCCTCTGAGGTGAGGGCGAG	P1P2	42	0.382203	0.0115385	0.10657	FALSE
ARF1	chr1	228270484	-	28	GCCTCTGAGGTGAGGGCGAGGGGCG	P1P2	47	-0.139088	0.0285714	0.113431	FALSE
ARF1	chr1	228270494	-	24	GGCGAGGGGCGCGGGCCGGTG	P1P2	57	1.28618	0.075	0.00910879	FALSE
ARF1	chr1	228270494	-	25	GGGCGAGGGGCGCGGGCCGGTG	P1P2	57	-0.133572	0.072	0.00910879	FALSE
ARF1	chr1	228270494	-	27	GAGGGCGAGGGGCGCGGGCCGGTG	P1P2	57	0.180205	0.0666667	0.00910879	FALSE
ARF1	chr1	228270495	-	24	GCGAGGGGCGCGGGCCGGTGT	P1P2	58	1.34419	0.0791667	0.0562508	FALSE
ARF1	chr1	228270495	-	25	GGCGAGGGGCGCGGGCCGGTGT	P1P2	58	0.409372	0.076	0.0562508	FALSE
ARF1	chr1	228270495	-	26	GGGCGAGGGGCGCGGGCCGGTGT	P1P2	58	0.817777	0.0730769	0.0562508	FALSE
ARF1	chr1	228270495	-	28	GAGGGCGAGGGGCGCGGGCCGGTGT	P1P2	58	0.68662	0.0678571	0.0562508	FALSE
ARF1	chr1	228270510	-	26	GCCGGTGTGGGCCGCAGAGACGT	P1P2	73	0.605153	0.0692308	0.24251	FALSE
ARF1	chr1	228270510	-	27	GGCCGGTGTGGGCCGCAGAGACGT	P1P2	73	-1.10268	0.0703704	0.24251	FALSE
ARF1	chr1	228270510	-	28	GGGCCGGTGTGGGCCGCAGAGACGT	P1P2	73	1.07764	0.0714286	0.24251	FALSE
ARF1	chr1	228270516	-	23	GGCCGCAGAGACGTTGGAGC	P1P2	79	0.226443	0.0391304	0.0834683	FALSE
ARF1	chr1	228270516	-	24	GGGCCGCAGAGACGTTGGAGC	P1P2	79	-0.850727	0.0416667	0.0834683	FALSE
ARF1	chr1	228270516	-	26	GTGGGCCGCAGAGACGTTGGAGC	P1P2	79	0.943831	0.0461538	0.0834683	FALSE
ARF1	chr1	228270516	-	28	GTGTGGGCCGCAGAGACGTTGGAGC	P1P2	79	0.606651	0.05	0.0834683	FALSE
ARF1	chr1	228270519	-	22	GCAGAGACGTTGGAGCCGG	P1P2	82	0.807594	0.0227273	0.036491	FALSE
ARF1	chr1	228270519	-	25	GCCGCAGAGACGTTGGAGCCGG	P1P2	82	-0.0714918	0.032	0.036491	FALSE
ARF1	chr1	228270519	-	26	GGCCGCAGAGACGTTGGAGCCGG	P1P2	82	2.03384	0.0346154	0.036491	FALSE
ARF1	chr1	228270519	-	27	GGGCCGCAGAGACGTTGGAGCCGG	P1P2	82	0.260941	0.037037	0.036491	FALSE
ARF1	chr1	228270520	-	23	GCAGAGACGTTGGAGCCGGC	P1P2	83	1.07434	0.0217391	0.427537	FALSE
ARF1	chr1	228270520	-	26	GCCGCAGAGACGTTGGAGCCGGC	P1P2	83	-0.346012	0.0307692	0.427537	FALSE
ARF1	chr1	228270520	-	27	GGCCGCAGAGACGTTGGAGCCGGC	P1P2	83	-0.425556	0.0333333	0.427537	FALSE
ARF1	chr1	228270520	-	28	GGGCCGCAGAGACGTTGGAGCCGGC	P1P2	83	-0.694354	0.0357143	0.427537	FALSE
ARF1	chr1	228270521	-	24	GCAGAGACGTTGGAGCCGGCG	P1P2	84	1.21079	0.0208333	0.159721	FALSE
ARF1	chr1	228270521	-	27	GCCGCAGAGACGTTGGAGCCGGCG	P1P2	84	-0.362189	0.0296296	0.159721	FALSE
ARF1	chr1	228270521	-	28	GGCCGCAGAGACGTTGGAGCCGGCG	P1P2	84	-1.33458	0.0321429	0.159721	FALSE
ARF1	chr1	228270522	-	22	GAGACGTTGGAGCCGGCGG	P1P2	85	1.23038	0.00909091	0.304245	FALSE
ARF1	chr1	228270522	-	25	GCAGAGACGTTGGAGCCGGCGG	P1P2	85	0.347484	0.02	0.304245	FALSE
ARF1	chr1	228270522	-	28	GCCGCAGAGACGTTGGAGCCGGCGG	P1P2	85	0.745356	0.0285714	0.304245	FALSE
ARF1	chr1	228270526	-	26	GAGACGTTGGAGCCGGCGGGGGC	P1P2	89	1.57075	0.00769231	0.00304163	FALSE
ARF1	chr1	228270527	-	25	GACGTTGGAGCCGGCGGGGGCT	P1P2	90	-0.987037	0	0.0130787	FALSE
ARF1	chr1	228270527	-	27	GAGACGTTGGAGCCGGCGGGGGCT	P1P2	90	1.3736	0.00740741	0.0130787	FALSE
ARF1	chr1	228270528	-	26	GACGTTGGAGCCGGCGGGGGCTG	P1P2	91	0.940152	0	0.0379234	FALSE
ARF1	chr1	228270528	-	28	GAGACGTTGGAGCCGGCGGGGGCTG	P1P2	91	0.546685	0.00714286	0.0379234	FALSE
ARF1	chr1	228270533	-	28	GTTGGAGCCGGCGGGGGCTGGGGAC	P1P2	96	0.567664	0	0.00217711	FALSE
ARF1	chr1	228270539	-	28	GCCGGCGGGGGCTGGGGACTGGCCT	P1P2	102	1.1486	0	0.0460983	FALSE
ARF1	chr1	228270540	-	26	GGCGGGGGCTGGGGACTGGCCTC	P1P2	103	-1.48743	0	0.00195067	FALSE
ARF1	chr1	228270541	-	26	GCGGGGGCTGGGGACTGGCCTCG	P1P2	104	-0.199565	0	0.0317423	FALSE
ARF1	chr1	228270541	-	27	GGCGGGGGCTGGGGACTGGCCTCG	P1P2	104	-0.0869515	0	0.0317423	FALSE
ARF1	chr1	228270551	-	24	GACTGGCCTCGGGGCGACTTG	P1P2	114	0.970295	0	0.211107	FALSE
ARF1	chr1	228270551	-	25	GGACTGGCCTCGGGGCGACTTG	P1P2	114	-0.275473	0	0.211107	FALSE
ARF1	chr1	228270551	-	26	GGGACTGGCCTCGGGGCGACTTG	P1P2	114	0.0740178	0	0.211107	FALSE
ARF1	chr1	228270551	-	27	GGGGACTGGCCTCGGGGCGACTTG	P1P2	114	0.0826377	0	0.211107	FALSE
ARF1	chr1	228270561	-	22	GGCGACTTGAGGTTCGCGA	P1P2	124	0.0446752	0	0.358208	FALSE
ARF1	chr1	228270561	-	23	GGGCGACTTGAGGTTCGCGA	P1P2	124	0.529574	0	0.358208	FALSE
ARF1	chr1	228270561	-	24	GGGGCGACTTGAGGTTCGCGA	P1P2	124	-0.628052	0	0.358208	FALSE
ARF1	chr1	228270562	-	22	GCGACTTGAGGTTCGCGAA	P1P2	125	0.594417	0	0.455671	FALSE
ARF1	chr1	228270562	-	23	GGCGACTTGAGGTTCGCGAA	P1P2	125	0.524158	0	0.455671	FALSE
ARF1	chr1	228270562	-	24	GGGCGACTTGAGGTTCGCGAA	P1P2	125	-0.175907	0	0.455671	FALSE
ARF1	chr1	228270562	-	25	GGGGCGACTTGAGGTTCGCGAA	P1P2	125	0.877027	0	0.455671	FALSE
ARF1	chr1	228270579	-	23	GAAGGGCACGTCGACCCCCg	P1P2	142	-1.39964	0	0.234264	FALSE
ARF1	chr1	228270579	-	25	GCGAAGGGCACGTCGACCCCCg	P1P2	142	0.121731	0	0.234264	FALSE
ARF1	chr1	228270582	-	23	GGGCACGTCGACCCCCgcgg	P1P2	145	0.825383	0	0.431487	FALSE
ARF1	chr1	228270582	-	26	GAAGGGCACGTCGACCCCCgcgg	P1P2	145	1.50038	0	0.431487	FALSE
ARF1	chr1	228270582	-	28	GCGAAGGGCACGTCGACCCCCgcgg	P1P2	145	-0.698845	0	0.431487	FALSE
ARF1	chr1	228270595	-	27	GACCCCCgcggcggcggcggcgac	P1P2	158	0.316931	0	0.168837	FALSE
ARF1	chr1	228270596	-	28	GACCCCCgcggcggcggcggcgaca	P1P2	159	-0.0448031	0	0.258202	FALSE
ARF1	chr1	228270605	-	27	gcggcggcggcgacagggccgggc	P1P2	168	-0.852175	0	0.193313	FALSE
ARF1	chr1	228270605	-	28	ggcggcggcggcgacagggccgggc	P1P2	168	1.57441	0	0.193313	FALSE
ARF1	chr1	228270608	-	28	ggcggcggcgacagggccgggccgg	P1P2	171	1.60649	0	0.193313	FALSE
ARF1	chr1	228270621	-	26	gccgggccgggggcggacgcaga	P1P2	184	0.852084	0	0.193313	FALSE
ARF1	chr1	228270621	-	27	ggccgggccgggggcggacgcaga	P1P2	184	1.06563	0	0.193313	FALSE
ARF1	chr1	228270621	-	28	gggccgggccgggggcggacgcaga	P1P2	184	2.02784	0	0.193313	FALSE
ARF1	chr1	228270622	-	27	gccgggccgggggcggacgcagac	P1P2	185	0.957625	0	0.193313	FALSE
ARF1	chr1	228270622	-	28	ggccgggccgggggcggacgcagac	P1P2	185	1.19066	0	0.193313	FALSE
ARF1	chr1	228270626	-	26	gccgggggcggacgcagacgggc	P1P2	189	-0.650966	0	0.193313	FALSE
ARF1	chr1	228270626	-	27	ggccgggggcggacgcagacgggc	P1P2	189	1.18961	0	0.193313	FALSE
ARF1	chr1	228270626	-	28	gggccgggggcggacgcagacgggc	P1P2	189	0.675175	0	0.193313	FALSE
ARF1	chr1	228270627	-	27	gccgggggcggacgcagacgggcc	P1P2	190	0.894297	0	0.193313	FALSE
ARF1	chr1	228270627	-	28	ggccgggggcggacgcagacgggcc	P1P2	190	1.53119	0	0.193313	FALSE
ARF1	chr1	228270633	-	23	gacgcagacgggccgggctg	P1P2	196	0.909447	0	0.193313	FALSE
ARF1	chr1	228270633	-	24	ggacgcagacgggccgggctg	P1P2	196	1.19843	0	0.193313	FALSE
ARF1	chr1	228270633	-	26	gcggacgcagacgggccgggctg	P1P2	196	0.257286	0	0.193313	FALSE
ARF1	chr1	228270633	-	27	ggcggacgcagacgggccgggctg	P1P2	196	-0.985185	0	0.193313	FALSE
ARF1	chr1	228270633	-	28	gggcggacgcagacgggccgggctg	P1P2	196	-0.386962	0	0.193313	FALSE
ARF1	chr1	228270637	-	27	gacgcagacgggccgggctgaggc	P1P2	200	1.0273	0	0.193313	FALSE
ARF1	chr1	228270637	-	28	ggacgcagacgggccgggctgaggc	P1P2	200	2.05528	0	0.193313	FALSE
ARF1	chr1	228270638	-	28	gacgcagacgggccgggctgaggct	P1P2	201	0.136753	0	0.193313	FALSE
ARF1	chr1	228270648	-	27	gccgggctgaggctggggcccggc	P1P2	211	1.3437	0	0.193313	FALSE
ARF1	chr1	228270648	-	28	ggccgggctgaggctggggcccggc	P1P2	211	0.970527	0	0.193313	FALSE
ARF1	chr1	228270654	-	25	gaggctggggcccggccggagt	P1P2	217	2.42234	0	0.193313	FALSE
ARF1	chr1	228270654	-	28	gctgaggctggggcccggccggagt	P1P2	217	1.61614	0	0.193313	FALSE
ARF1	chr1	228270655	-	26	gaggctggggcccggccggagtc	P1P2	218	2.15513	0	0.193313	FALSE
ARF1	chr1	228270656	-	27	gaggctggggcccggccggagtcg	P1P2	219	2.50484	0	0.193313	FALSE
ARF1	chr1	228270660	-	28	gctggggcccggccggagtcggggc	P1P2	223	3.3329	0	0.193313	FALSE
ARF1	chr1	228270661	-	26	ggggcccggccggagtcggggct	P1P2	224	2.42841	0	0.193313	FALSE
ARF1	chr1	228270664	-	26	gcccggccggagtcggggctggg	P1P2	227	0.371997	0	0.193313	FALSE
ARF1	chr1	228270664	-	27	ggcccggccggagtcggggctggg	P1P2	227	0.415013	0	0.193313	FALSE
ARF1	chr1	228270664	-	28	gggcccggccggagtcggggctggg	P1P2	227	2.19177	0	0.193313	FALSE
ARF1	chr1	228270668	-	25	gccggagtcggggctgggcgga	P1P2	231	1.8102	0	0.193313	FALSE
ARF1	chr1	228270668	-	26	ggccggagtcggggctgggcgga	P1P2	231	0.467669	0	0.193313	FALSE
ARF1	chr1	228270669	-	26	gccggagtcggggctgggcggac	P1P2	232	0.393094	0	0.193313	FALSE
ARF1	chr1	228270669	-	27	ggccggagtcggggctgggcggac	P1P2	232	1.19112	0	0.193313	FALSE
ARF1	chr1	228270672	-	25	gagtcggggctgggcggacggg	P1P2	235	0.453982	0	0.193313	FALSE
ARF1	chr1	228270672	-	26	ggagtcggggctgggcggacggg	P1P2	235	1.33492	0	0.193313	FALSE
ARF1	chr1	228270673	-	26	gagtcggggctgggcggacgggc	P1P2	236	0.523463	0	0.25259	FALSE
ARF1	chr1	228270673	-	27	ggagtcggggctgggcggacgggc	P1P2	236	3.52976	0	0.25259	FALSE
ARF1	chr1	228270677	-	28	gtcggggctgggcggacgggcgggT	P1P2	240	0.739884	0	0.265008	FALSE
ARF1	chr1	228270701	-	25	GTGAGCTCCTCGCACCCCTCAC	P1P2	264	0.181391	0	0.128036	FALSE
ARF1	chr1	228270701	-	26	GGTGAGCTCCTCGCACCCCTCAC	P1P2	264	0.198127	0	0.128036	FALSE
ARF1	chr1	228270777	-	25	GCCCGTCGCCCGGAAGTCCGCT	P1P2	340	0.212916	0	0.311302	FALSE
ARF1	chr1	228270784	-	25	GCCCGGAAGTCCGCTTGGACGC	P1P2	347	-0.520515	0	0.084124	FALSE
ARF1	chr1	228270784	-	28	GTCGCCCGGAAGTCCGCTTGGACGC	P1P2	347	1.38102	0	0.084124	FALSE
ARF1	chr1	228270785	-	22	GGAAGTCCGCTTGGACGCC	P1P2	348	-1.21733	0	0.0234791	FALSE
ARF1	chr1	228270785	-	26	GCCCGGAAGTCCGCTTGGACGCC	P1P2	348	0.166231	0	0.0234791	FALSE
ARF1	chr1	228270797	-	26	GCTTGGACGCCGGGCTCTTCTCC	P1P2	360	1.32191	0	0.0178102	FALSE
ARF1	chr1	228270805	-	26	GCCGGGCTCTTCTCCAGGAAACC	P1P2	368	-0.0738821	0	0.077779	FALSE
ARF1	chr1	228270806	-	24	GGGCTCTTCTCCAGGAAACCT	P1P2	369	2.32431	0	0.377054	FALSE
ARF1	chr1	228270806	-	27	GCCGGGCTCTTCTCCAGGAAACCT	P1P2	369	1.10303	0	0.377054	FALSE
ARF1	chr1	228270847	-	26	GCCTCTGCCTTTCTCGTTTCCCG	P1P2	410	1.66578	0	0.65791	FALSE
ARF1	chr1	228270861	-	25	GTTTCCCGAGGCCGCCCGCGCG	P1P2	424	-0.266528	0	0.0539348	FALSE
ARF1	chr1	228270865	-	22	GAGGCCGCCCGCGCGTGGA	P1P2	428	0.631548	0	0.229942	FALSE
ARF1	chr1	228270869	-	24	GGCCGCCCGCGCGTGGACGGT	P1P2	432	-0.734578	0	0.0110092	FALSE
ARF1	chr1	228270869	-	26	GAGGCCGCCCGCGCGTGGACGGT	P1P2	432	0.932562	0	0.0110092	FALSE
ARF1	chr1	228270870	-	24	GCCGCCCGCGCGTGGACGGTT	P1P2	433	-0.941817	0	0.0294406	FALSE
ARF1	chr1	228270870	-	25	GGCCGCCCGCGCGTGGACGGTT	P1P2	433	1.7738	0	0.0294406	FALSE
ARF1	chr1	228270870	-	27	GAGGCCGCCCGCGCGTGGACGGTT	P1P2	433	0.282572	0	0.0294406	FALSE
ARF1	chr1	228270878	-	23	GCGTGGACGGTTGGGATTAG	P1P2	441	-0.360432	0	0.354381	FALSE
ARF1	chr1	228270878	-	25	GCGCGTGGACGGTTGGGATTAG	P1P2	441	-0.153522	0	0.354381	FALSE
ARF1	chr1	228270884	-	24	GACGGTTGGGATTAGCGGCCG	P1P2	447	0.979045	0	0.0547745	FALSE
ARF1	chr1	228270884	-	25	GGACGGTTGGGATTAGCGGCCG	P1P2	447	0.681612	0	0.0547745	FALSE
ARF1	chr1	228270884	-	27	GTGGACGGTTGGGATTAGCGGCCG	P1P2	447	1.38026	0	0.0547745	FALSE
ARF1	chr1	228270885	-	25	GACGGTTGGGATTAGCGGCCGC	P1P2	448	-0.259783	0	0.0223245	FALSE
ARF1	chr1	228270885	-	26	GGACGGTTGGGATTAGCGGCCGC	P1P2	448	0.567401	0	0.0223245	FALSE
ARF1	chr1	228270885	-	28	GTGGACGGTTGGGATTAGCGGCCGC	P1P2	448	-0.602358	0	0.0223245	FALSE
ARF1	chr1	228270886	-	26	GACGGTTGGGATTAGCGGCCGCG	P1P2	449	1.78735	0	0.445539	FALSE
ARF1	chr1	228270886	-	27	GGACGGTTGGGATTAGCGGCCGCG	P1P2	449	0.689779	0	0.445539	FALSE
ARF1	chr1	228270887	-	27	GACGGTTGGGATTAGCGGCCGCGG	P1P2	450	0.408723	0	0.315306	FALSE
ARF1	chr1	228270887	-	28	GGACGGTTGGGATTAGCGGCCGCGG	P1P2	450	1.56055	0	0.315306	FALSE
ARF1	chr1	228270891	-	24	GGGATTAGCGGCCGCGGGGGC	P1P2	454	1.80616	0	0.0280805	FALSE
ARF1	chr1	228270891	-	27	GTTGGGATTAGCGGCCGCGGGGGC	P1P2	454	0.601765	0	0.0280805	FALSE
ARF1	chr1	228270891	-	28	GGTTGGGATTAGCGGCCGCGGGGGC	P1P2	454	1.72359	0	0.0280805	FALSE
ARF1	chr1	228270894	-	26	GGATTAGCGGCCGCGGGGGCCGG	P1P2	457	1.48983	0	0.0246303	FALSE
ARF1	chr1	228270894	-	27	GGGATTAGCGGCCGCGGGGGCCGG	P1P2	457	1.85569	0	0.0246303	FALSE
ARF1	chr1	228270895	-	26	GATTAGCGGCCGCGGGGGCCGGT	P1P2	458	1.57372	0	0.0836939	FALSE
ARF1	chr1	228270895	-	27	GGATTAGCGGCCGCGGGGGCCGGT	P1P2	458	0.930747	0	0.0836939	FALSE
ARF1	chr1	228270895	-	28	GGGATTAGCGGCCGCGGGGGCCGGT	P1P2	458	1.98862	0	0.0836939	FALSE
ARF1	chr1	228270896	-	27	GATTAGCGGCCGCGGGGGCCGGTG	P1P2	459	2.09977	0	0.0106963	FALSE
ARF1	chr1	228270896	-	28	GGATTAGCGGCCGCGGGGGCCGGTG	P1P2	459	1.51954	0	0.0106963	FALSE
ARF1	chr1	228270897	-	28	GATTAGCGGCCGCGGGGGCCGGTGG	P1P2	460	1.05018	0	0.0884644	FALSE
ARF1	chr1	228270903	-	26	GCCGCGGGGGCCGGTGGGGGTCG	P1P2	466	1.5296	0	0.0101509	FALSE
ARF1	chr1	228270903	-	27	GGCCGCGGGGGCCGGTGGGGGTCG	P1P2	466	1.20009	0	0.0101509	FALSE
ARF1	chr1	228270904	-	27	GCCGCGGGGGCCGGTGGGGGTCGT	P1P2	467	0.725489	0	0.00643163	FALSE
ARF1	chr1	228270904	-	28	GGCCGCGGGGGCCGGTGGGGGTCGT	P1P2	467	1.00225	0	0.00643163	FALSE
ARF1	chr1	228270905	-	28	GCCGCGGGGGCCGGTGGGGGTCGTG	P1P2	468	0.436749	0	0.0153437	FALSE
ARF1	chr1	228270926	-	25	GGGGCCTCCCCCACCCGAGTAC	P1P2	489	-0.172424	0	0.0918316	FALSE
ARF1	chr1	228270926	-	27	GTGGGGCCTCCCCCACCCGAGTAC	P1P2	489	0.246763	0	0.0918316	FALSE
ARF1	chr1	228270944	-	25	GTACAGGCGAGCGAGCGGCATC	P1P2	507	-0.550823	0	0.0319896	FALSE
ARF1	chr1	228270944	-	27	GAGTACAGGCGAGCGAGCGGCATC	P1P2	507	0.473048	0	0.0319896	FALSE
ARF1	chr1	228270945	-	26	GTACAGGCGAGCGAGCGGCATCC	P1P2	508	-0.248928	0	0.00847045	FALSE
ARF1	chr1	228270945	-	28	GAGTACAGGCGAGCGAGCGGCATCC	P1P2	508	-0.0382796	0	0.00847045	FALSE
ARF1	chr1	228270948	-	23	GCGAGCGAGCGGCATCCGGG	P1P2	511	2.58654	0	0.765649	FALSE
ARF1	chr1	228270948	-	24	GGCGAGCGAGCGGCATCCGGG	P1P2	511	1.05947	0	0.765649	FALSE
ARF1	chr1	228270961	-	25	GCATCCGGGCGGACCCCCGCCT	P1P2	524	1.16279	0	0.0745509	FALSE
ARF1	chr1	228270961	-	26	GGCATCCGGGCGGACCCCCGCCT	P1P2	524	0.577619	0	0.0745509	FALSE
ARF1	chr1	228270961	-	28	GCGGCATCCGGGCGGACCCCCGCCT	P1P2	524	1.75904	0	0.0745509	FALSE
ARF1	chr1	228270962	-	26	GCATCCGGGCGGACCCCCGCCTC	P1P2	525	1.16369	0	0.00133209	FALSE
ARF1	chr1	228270962	-	27	GGCATCCGGGCGGACCCCCGCCTC	P1P2	525	0.835276	0	0.00133209	FALSE
ARF1	chr1	228270963	-	27	GCATCCGGGCGGACCCCCGCCTCG	P1P2	526	0.92644	0	0.0860685	FALSE
ARF1	chr1	228270963	-	28	GGCATCCGGGCGGACCCCCGCCTCG	P1P2	526	1.68008	0	0.0860685	FALSE
ARF1	chr1	228270968	-	24	GCGGACCCCCGCCTCGGGGAC	P1P2	531	2.13486	0	0.00717144	FALSE
ARF1	chr1	228270968	-	25	GGCGGACCCCCGCCTCGGGGAC	P1P2	531	3.15864	0	0.00717144	FALSE
ARF1	chr1	228270968	-	26	GGGCGGACCCCCGCCTCGGGGAC	P1P2	531	-1.99283	0	0.00717144	FALSE
ARF1	chr1	228270969	-	25	GCGGACCCCCGCCTCGGGGACC	P1P2	532	0.371238	0	0.0164088	FALSE
ARF1	chr1	228270969	-	26	GGCGGACCCCCGCCTCGGGGACC	P1P2	532	1.48407	0	0.0164088	FALSE
ARF1	chr1	228270969	-	27	GGGCGGACCCCCGCCTCGGGGACC	P1P2	532	0.445477	0	0.0164088	FALSE
ARF1	chr1	228270978	-	24	GCCTCGGGGACCGGGAAACTG	P1P2	541	-0.292945	0	0.316687	FALSE
ARF1	chr1	228270987	-	27	GGGACCGGGAAACTGAGGCTCGGG	P1P2	550	-0.123815	0	0.128151	FALSE
ARF1	chr1	228270987	-	28	GGGGACCGGGAAACTGAGGCTCGGG	P1P2	550	1.03793	0	0.128151	FALSE
ARF1	chr1	228271005	-	22	GCGGCCTGAGACGCCGTCA	P1P2	568	-0.530693	0	0.0352021	FALSE
ARF1	chr1	228271005	-	23	GGCGGCCTGAGACGCCGTCA	P1P2	568	-0.0475416	0	0.0352021	FALSE
ARF1	chr1	228271005	-	24	GGGCGGCCTGAGACGCCGTCA	P1P2	568	-0.499693	0	0.0352021	FALSE
ARF1	chr1	228271005	-	28	GCTCGGGCGGCCTGAGACGCCGTCA	P1P2	568	0.410092	0	0.0352021	FALSE
ARF1	chr1	228271014	-	24	GAGACGCCGTCAAGGTCATGT	P1P2	577	-0.909048	0	0.294147	FALSE
ARF1	chr1	228271014	-	28	GCCTGAGACGCCGTCAAGGTCATGT	P1P2	577	0.728696	0	0.294147	FALSE
ARF1	chr1	228271017	-	25	GACGCCGTCAAGGTCATGTAGG	P1P2	580	-0.736126	0	0.101684	FALSE
ARF1	chr1	228271017	-	27	GAGACGCCGTCAAGGTCATGTAGG	P1P2	580	-0.256175	0	0.101684	FALSE
ARF1	chr1	228271020	-	25	GCCGTCAAGGTCATGTAGGTGG	P1P2	583	-0.738474	0	0.147385	FALSE
ARF1	chr1	228271020	-	28	GACGCCGTCAAGGTCATGTAGGTGG	P1P2	583	-0.00761945	0	0.147385	FALSE
ARF1	chr1	228271021	-	26	GCCGTCAAGGTCATGTAGGTGGT	P1P2	584	-0.00919579	0	0.133285	FALSE
ARF1	chr1	228271022	-	24	GTCAAGGTCATGTAGGTGGTG	P1P2	585	0.838865	0	0.0936485	FALSE
ARF1	chr1	228271022	-	27	GCCGTCAAGGTCATGTAGGTGGTG	P1P2	585	1.39179	0	0.0936485	FALSE
ARF1	chr1	228271023	-	25	GTCAAGGTCATGTAGGTGGTGG	P1P2	586	-0.512906	0	0.129499	FALSE
ARF1	chr1	228271023	-	28	GCCGTCAAGGTCATGTAGGTGGTGG	P1P2	586	0.275893	0	0.129499	FALSE
ARF1	chr1	228271081	-	25	GTGTTTGCTGTGAAGACGGTAC	P1P2	644	-0.389061	0.5	0.431601	FALSE
ARF1	chr1	228271082	-	24	GTTTGCTGTGAAGACGGTACC	P1P2	645	0.763817	0.5	0.0800031	FALSE
ARF1	chr1	228271082	-	26	GTGTTTGCTGTGAAGACGGTACC	P1P2	645	-0.557516	0.5	0.0800031	FALSE
ARF1	chr1	228271087	-	22	GTGAAGACGGTACCGGGTC	P1P2	650	-0.0451525	0.5	0.00848506	FALSE
ARF1	chr1	228271087	-	25	GCTGTGAAGACGGTACCGGGTC	P1P2	650	0.111089	0.5	0.00848506	FALSE
ARF1	chr1	228271088	-	23	GTGAAGACGGTACCGGGTCA	P1P2	651	1.25024	0.5	0.090136	FALSE
ARF1	chr1	228271088	-	26	GCTGTGAAGACGGTACCGGGTCA	P1P2	651	-1.36716	0.5	0.090136	FALSE
ARF1	chr1	228271089	-	22	GAAGACGGTACCGGGTCAG	P1P2	652	0.474803	0.5	0.0532526	FALSE
ARF1	chr1	228271089	-	24	GTGAAGACGGTACCGGGTCAG	P1P2	652	0.271917	0.5	0.0532526	FALSE
ARF1	chr1	228271089	-	27	GCTGTGAAGACGGTACCGGGTCAG	P1P2	652	-0.445112	0.5	0.0532526	FALSE
ARF1	chr1	228271092	-	22	GACGGTACCGGGTCAGGGG	P1P2	655	1.85962	0.5	0.175221	FALSE
ARF1	chr1	228271092	-	25	GAAGACGGTACCGGGTCAGGGG	P1P2	655	-0.115566	0.5	0.175221	FALSE
ARF1	chr1	228271092	-	27	GTGAAGACGGTACCGGGTCAGGGG	P1P2	655	1.45398	0.5	0.175221	FALSE
ARF1	chr1	228271101	-	27	GTACCGGGTCAGGGGTGGTGAGAG	P1P2	664	-1.7777	0.514815	0.00999212	FALSE
ARF1	chr1	228271101	-	28	GGTACCGGGTCAGGGGTGGTGAGAG	P1P2	664	1.27231	0.514286	0.00999212	FALSE
ARF1	chr1	228271102	-	28	GTACCGGGTCAGGGGTGGTGAGAGC	P1P2	665	1.06085	0.517857	0.0215463	FALSE
ARF1	chr1	228271105	-	26	GGGTCAGGGGTGGTGAGAGCGGG	P1P2	668	-1.08096	0.523077	0.26526	FALSE
ARF1	chr1	228271106	-	25	GTCAGGGGTGGTGAGAGCGGGC	P1P2	669	1.25576	0.524	0.020389	FALSE
ARF1	chr1	228271106	-	26	GGTCAGGGGTGGTGAGAGCGGGC	P1P2	669	1.15614	0.523077	0.020389	FALSE
ARF1	chr1	228271106	-	27	GGGTCAGGGGTGGTGAGAGCGGGC	P1P2	669	0.970687	0.522222	0.020389	FALSE
ARF1	chr1	228271113	-	28	GGGGTGGTGAGAGCGGGCGGGCAGG	P1P2	676	0.759844	0.514286	0.0745788	FALSE
ARF1	chr1	228271118	-	27	GTGAGAGCGGGCGGGCAGGTGGAC	P1P2	681	-0.456438	0.488889	0.0322422	FALSE
ARF1	chr1	228271118	-	28	GGTGAGAGCGGGCGGGCAGGTGGAC	P1P2	681	1.27991	0.489286	0.0322422	FALSE
ARF1	chr1	228271149	-	25	GTGCCCTTCCCTGTCTGCTGAA	P1P2	712	-0.61937	0.46	0.590703	FALSE
ARF1	chr1	228271166	-	23	GAACGGAATGCGTGGACCTC	P1P2	729	-0.30711	0.617391	0.00666386	FALSE
ARF1	chr1	228271166	-	26	GCTGAACGGAATGCGTGGACCTC	P1P2	729	0.83074	0.611538	0.00666386	FALSE
ARF1	chr1	228271167	-	24	GAACGGAATGCGTGGACCTCC	P1P2	730	-0.330283	0.6125	0.0233799	FALSE
ARF1	chr1	228271167	-	27	GCTGAACGGAATGCGTGGACCTCC	P1P2	730	-0.0333639	0.607407	0.0233799	FALSE
ARF1	chr1	228271168	-	25	GAACGGAATGCGTGGACCTCCG	P1P2	731	0.527249	0.608	0.360863	FALSE
ARF1	chr1	228271168	-	28	GCTGAACGGAATGCGTGGACCTCCG	P1P2	731	0.133576	0.603571	0.360863	FALSE
ARF1	chr1	228271169	-	26	GAACGGAATGCGTGGACCTCCGG	P1P2	732	-0.436009	0.6	0.149726	FALSE
ARF1	chr1	228271225	-	26	GACGCAATTTGGGGTCAGCACTC	P1P2	788	-0.468594	0.496154	0.0199731	FALSE
ARF1	chr1	228271225	-	28	GAGACGCAATTTGGGGTCAGCACTC	P1P2	788	0.128243	0.489286	0.0199731	FALSE
ARF1	chr1	228271226	-	24	GCAATTTGGGGTCAGCACTCA	P1P2	789	-0.936412	0.5125	0.014766	FALSE
ARF1	chr1	228271226	-	27	GACGCAATTTGGGGTCAGCACTCA	P1P2	789	0.357368	0.5	0.014766	FALSE
ARF1	chr1	228271235	-	23	GTCAGCACTCAGGGCACCGG	P1P2	798	-0.210958	0.578261	0.084528	FALSE
ARF1	chr1	228271235	-	24	GGTCAGCACTCAGGGCACCGG	P1P2	798	0.283896	0.575	0.084528	FALSE
ARF1	chr1	228271235	-	25	GGGTCAGCACTCAGGGCACCGG	P1P2	798	-0.434166	0.572	0.084528	FALSE
ARF1	chr1	228271235	-	26	GGGGTCAGCACTCAGGGCACCGG	P1P2	798	-0.986556	0.569231	0.084528	FALSE
ARF1	chr1	228271246	-	23	GGGCACCGGTGGCCTCCAGA	P1P2	809	-0.786657	0.747826	0.47578	FALSE
ARF1	chr1	228271250	-	25	GCACCGGTGGCCTCCAGAGGGC	P1P2	813	1.26155	0.796	0.166007	FALSE
ARF1	chr1	228271250	-	26	GGCACCGGTGGCCTCCAGAGGGC	P1P2	813	0.154818	0.788462	0.166007	FALSE
ARF1	chr1	228271250	-	27	GGGCACCGGTGGCCTCCAGAGGGC	P1P2	813	-0.397271	0.781482	0.166007	FALSE
ARF1	chr1	228271273	-	24	GTCGATCTTCGCTTTAACTCC	P1P2	836	-0.322558	0.829167	0.0517083	FALSE
ARF1	chr1	228271273	-	25	GGTCGATCTTCGCTTTAACTCC	P1P2	836	-1.67617	0.836	0.0517083	FALSE
ARF1	chr1	228271273	-	28	GCCGGTCGATCTTCGCTTTAACTCC	P1P2	836	1.56374	0.846429	0.0517083	FALSE
ARF1	chr1	228271274	-	25	GTCGATCTTCGCTTTAACTCCA	P1P2	837	-0.800184	0.82	0.598091	FALSE
ARF1	chr1	228271274	-	26	GGTCGATCTTCGCTTTAACTCCA	P1P2	837	-0.0496609	0.826923	0.598091	FALSE
ARF1	chr1	228271277	-	25	GATCTTCGCTTTAACTCCAGGG	P1P2	840	-0.777201	0.768	0.507684	FALSE
ARF1	chr1	228271277	-	28	GTCGATCTTCGCTTTAACTCCAGGG	P1P2	840	0.752829	0.789286	0.507684	FALSE
ARF1	chr1	228271295	-	24	GGGTGGTTTCCTTGACGTTGT	P1P2	858	-0.461115	0.4125	0.393453	FALSE
ARF1	chr1	228271310	-	26	GACGTTGTCGGCAGTAGATAAGA	P1P2	873	-0.766483	0.403846	0.161203	FALSE
ARF1	chr1	228271325	-	25	GATAAGAAGGCCTCTTCTGAGC	P1P2	888	0.181159	0.564	0.0578962	FALSE
ARF1	chr1	228271325	-	28	GTAGATAAGAAGGCCTCTTCTGAGC	P1P2	888	-0.172516	0.546429	0.0578962	FALSE
ARF1	chr1	228271388	-	25	GAACGACCTGCTCGCAGACTCT	P1P2	951	-0.186229	0.816	0.0644713	FALSE
ARF1	chr1	228271388	-	26	GGAACGACCTGCTCGCAGACTCT	P1P2	951	0.445288	0.811538	0.0644713	FALSE
ARF1	chr1	228271388	-	28	GCGGAACGACCTGCTCGCAGACTCT	P1P2	951	0.41346	0.803571	0.0644713	FALSE
ARF1	chr1	228271397	-	25	GCTCGCAGACTCTAGGCCGCAG	P1P2	960	0.243355	0.924	0.354673	FALSE
ARF1	chr1	228271401	-	25	GCAGACTCTAGGCCGCAGAGGC	P1P2	964	0.226875	0.952	0.0661276	FALSE
ARF1	chr1	228271418	-	23	GGCCGGCCCCAGCGCTCTCT	P1P2	981	1.82839	0.782609	0.0197891	FALSE
ARF1	chr1	228271418	-	25	GAGGCCGGCCCCAGCGCTCTCT	P1P2	981	0.51896	0.8	0.0197891	FALSE
ARF1	chr1	228271418	-	28	GCAGAGGCCGGCCCCAGCGCTCTCT	P1P2	981	1.06879	0.821429	0.0197891	FALSE
ARF1	chr1	228271430	-	24	GCGCTCTCTCGGAGCACAGCC	P1P2	993	-0.682405	0.541667	0.076909	FALSE
ARF1	chr1	228271434	-	26	GCTCTCTCGGAGCACAGCCTGGG	P1P2	997	0.876651	0.5	0.0616619	FALSE
ARF1	chr1	228271434	-	28	GCGCTCTCTCGGAGCACAGCCTGGG	P1P2	997	0.674968	0.521429	0.0616619	FALSE
ARF1	chr1	228271453	-	23	GTGGTTACGGCGTGTGAGAT	P1P2	1016	-0.591343	0.330435	0.0107559	FALSE
ARF1	chr1	228271453	-	24	GGTGGTTACGGCGTGTGAGAT	P1P2	1016	-0.153868	0.333333	0.0107559	FALSE
ARF1	chr1	228271453	-	25	GGGTGGTTACGGCGTGTGAGAT	P1P2	1016	1.4097	0.336	0.0107559	FALSE
ARF1	chr1	228271454	-	24	GTGGTTACGGCGTGTGAGATT	P1P2	1017	-3.58825	0.333333	0.00960774	FALSE
ARF1	chr1	228271454	-	25	GGTGGTTACGGCGTGTGAGATT	P1P2	1017	0.743141	0.336	0.00960774	FALSE
ARF1	chr1	228271454	-	26	GGGTGGTTACGGCGTGTGAGATT	P1P2	1017	0.522645	0.338462	0.00960774	FALSE
ARF1	chr1	228271455	-	22	GTTACGGCGTGTGAGATTG	P1P2	1018	-0.997655	0.327273	0.118239	FALSE
ARF1	chr1	228271455	-	23	GGTTACGGCGTGTGAGATTG	P1P2	1018	0.120157	0.330435	0.118239	FALSE
ARF1	chr1	228271455	-	25	GTGGTTACGGCGTGTGAGATTG	P1P2	1018	-1.85308	0.336	0.118239	FALSE
ARF1	chr1	228271455	-	26	GGTGGTTACGGCGTGTGAGATTG	P1P2	1018	-0.737246	0.338462	0.118239	FALSE
ARF1	chr1	228271455	-	27	GGGTGGTTACGGCGTGTGAGATTG	P1P2	1018	0.94034	0.340741	0.118239	FALSE
ARF1	chr1	228271459	-	26	GTTACGGCGTGTGAGATTGGGGC	P1P2	1022	0.056097	0.342308	0.0501187	FALSE
ARF1	chr1	228271459	-	27	GGTTACGGCGTGTGAGATTGGGGC	P1P2	1022	0.628908	0.344444	0.0501187	FALSE
ARF1	chr1	228271501	-	23	GTGTTAAATAACCATTCCGA	P1P2	1064	1.5407	0.5	0.480533	FALSE
ARF1	chr1	228271501	-	25	GAGTGTTAAATAACCATTCCGA	P1P2	1064	0.728609	0.508	0.480533	FALSE
ARF1	chr1	228271552	-	24	GGCAGCCAGTTGCTGCTTTGC	P1P2	1115	0.152733	0.95	0.0382529	FALSE
ARF1	chr1	228271574	-	24	GGAATTGAGCAGAAATGCACT	P1P2	1137	-1.57816	1.125	0.2647	FALSE
ARF1	chr1	228271574	-	27	GCAGGAATTGAGCAGAAATGCACT	P1P2	1137	-0.563862	1.12593	0.2647	FALSE
ARF1	chr1	228271582	-	24	GCAGAAATGCACTCGGAATCG	P1P2	1145	0.948328	0.9125	0.09649	FALSE
ARF1	chr1	228271582	-	26	GAGCAGAAATGCACTCGGAATCG	P1P2	1145	-0.0757449	0.942308	0.09649	FALSE
ARF1	chr1	228271583	-	22	GAAATGCACTCGGAATCGC	P1P2	1146	-0.605672	0.845455	0.315746	FALSE
ARF1	chr1	228271583	-	25	GCAGAAATGCACTCGGAATCGC	P1P2	1146	0.296158	0.896	0.315746	FALSE
ARF1	chr1	228271583	-	27	GAGCAGAAATGCACTCGGAATCGC	P1P2	1146	2.23041	0.925926	0.315746	FALSE
ARF1	chr1	228271587	-	26	GAAATGCACTCGGAATCGCGGGC	P1P2	1150	1.61434	0.792308	0.131665	FALSE
ARF1	chr1	228271596	-	24	GGAATCGCGGGCAGGAAAAGA	P1P2	1159	0.905975	0.5625	0.0231063	FALSE
ARF1	chr1	228271597	-	24	GAATCGCGGGCAGGAAAAGAA	P1P2	1160	-0.432938	0.55	0.398856	FALSE
ARF1	chr1	228271597	-	25	GGAATCGCGGGCAGGAAAAGAA	P1P2	1160	0.497189	0.56	0.398856	FALSE
ARF1	chr1	228271600	-	27	GAATCGCGGGCAGGAAAAGAAGGG	P1P2	1163	1.03327	0.555556	0.458994	FALSE
ARF1	chr1	228271600	-	28	GGAATCGCGGGCAGGAAAAGAAGGG	P1P2	1163	0.266031	0.564286	0.458994	FALSE
ARF1	chr1	228271604	-	26	GCGGGCAGGAAAAGAAGGGAGGT	P1P2	1167	-0.372858	0.534615	0.102997	FALSE
ARF1	chr1	228271607	-	25	GCAGGAAAAGAAGGGAGGTCGG	P1P2	1170	2.34711	0.552	0.181449	FALSE
ARF1	chr1	228271607	-	26	GGCAGGAAAAGAAGGGAGGTCGG	P1P2	1170	-1.3629	0.55	0.181449	FALSE
ARF1	chr1	228271607	-	27	GGGCAGGAAAAGAAGGGAGGTCGG	P1P2	1170	-0.369147	0.548148	0.181449	FALSE
ARF1	chr1	228271613	-	27	GAAAAGAAGGGAGGTCGGAGGCTT	P1P2	1176	-0.0325134	0.603704	0.0509625	FALSE
ARF1	chr1	228271613	-	28	GGAAAAGAAGGGAGGTCGGAGGCTT	P1P2	1176	-0.060304	0.6	0.0509625	FALSE
ARF1	chr1	228271617	-	26	GAAGGGAGGTCGGAGGCTTTGGA	P1P2	1180	-0.0897883	0.653846	0.237151	FALSE
ARF1	chr1	228271656	-	25	GCCTAGTTGAGAGCTGTAGAGT	P1P2	1219	2.11599	0.248	0.0931831	FALSE
ARF1	chr1	228271656	-	28	GCCGCCTAGTTGAGAGCTGTAGAGT	P1P2	1219	-0.274567	0.292857	0.0931831	FALSE
ARF1	chr1	228271674	-	25	GAGTTGGTGCCACTGCCCCTGT	P1P2	1237	0.352786	0.156	0.166043	FALSE
ARF1	chr1	228271674	-	28	GTAGAGTTGGTGCCACTGCCCCTGT	P1P2	1237	-0.437492	0.15	0.166043	FALSE
ARF1	chr1	228271679	-	24	GTGCCACTGCCCCTGTTGGAG	P1P2	1242	-0.974272	0.2	0.0164622	FALSE
ARF1	chr1	228271679	-	25	GGTGCCACTGCCCCTGTTGGAG	P1P2	1242	1.66919	0.196	0.0164622	FALSE
ARF1	chr1	228271679	-	28	GTTGGTGCCACTGCCCCTGTTGGAG	P1P2	1242	0.447352	0.185714	0.0164622	FALSE
ARF1	chr1	228271680	-	25	GTGCCACTGCCCCTGTTGGAGT	P1P2	1243	0.254522	0.204	0.162424	FALSE
ARF1	chr1	228271680	-	26	GGTGCCACTGCCCCTGTTGGAGT	P1P2	1243	-0.694522	0.2	0.162424	FALSE
ARF1	chr1	228271710	-	25	GTAGTTCTTGTTTCAGAACTAG	P1P2	1273	0.294284	0.84	0.24891	FALSE
ARF1	chr1	228271710	-	28	GTTGTAGTTCTTGTTTCAGAACTAG	P1P2	1273	0.456154	0.792857	0.24891	FALSE
ARF1	chr1	228271741	-	25	GTTTTCTTTGCCGGCTGTTGCA	P1P2	1304	1.07607	2.044	0.526192	FALSE
ARF1	chr1	228271741	-	28	GCAGTTTTCTTTGCCGGCTGTTGCA	P1P2	1304	1.39897	2.01429	0.526192	FALSE
ARF1	chr1	228271774	-	22	GGCGTTTTCCGCAGTGTGT	P1P2	1337	0.856862	1.38636	0.0843343	FALSE
ARF1	chr1	228271774	-	27	GTTCTGGCGTTTTCCGCAGTGTGT	P1P2	1337	-1.40234	1.48519	0.0843343	FALSE
ARF1	chr1	228271774	-	28	GGTTCTGGCGTTTTCCGCAGTGTGT	P1P2	1337	-0.837352	1.50357	0.0843343	FALSE
ARF1	chr1	228271775	-	23	GGCGTTTTCCGCAGTGTGTT	P1P2	1338	-0.335836	1.36522	0.1002	FALSE
ARF1	chr1	228271775	-	28	GTTCTGGCGTTTTCCGCAGTGTGTT	P1P2	1338	-0.541243	1.46429	0.1002	FALSE
ARF1	chr1	228271778	-	23	GTTTTCCGCAGTGTGTTGGG	P1P2	1341	-0.621619	1.24348	0.454815	FALSE
ARF1	chr1	228271778	-	25	GCGTTTTCCGCAGTGTGTTGGG	P1P2	1341	-1.80025	1.284	0.454815	FALSE
ARF1	chr1	228271778	-	26	GGCGTTTTCCGCAGTGTGTTGGG	P1P2	1341	-0.339199	1.30385	0.454815	FALSE
ARF1	chr1	228271795	-	28	GTGTTGGGAGGAGTGTGAGATGCCG	P1P2	1358	-0.109657	0.717857	0.658529	FALSE
ARF1	chr1	228271810	-	22	GCCGCGGTGCAGTTGTGTG	P1P2	1373	0.196492	0.563636	0.14334	FALSE
ARF1	chr1	228271810	-	25	GATGCCGCGGTGCAGTTGTGTG	P1P2	1373	0.659076	0.556	0.14334	FALSE
ARF1	chr1	228271810	-	27	GAGATGCCGCGGTGCAGTTGTGTG	P1P2	1373	0.431373	0.559259	0.14334	FALSE
ARF1	chr1	228271819	-	25	GTGCAGTTGTGTGCGGCCCCTG	P1P2	1382	0.135694	0.748	0.17135	FALSE
ARF1	chr1	228271819	-	26	GGTGCAGTTGTGTGCGGCCCCTG	P1P2	1382	0.267578	0.734615	0.17135	FALSE
ARF1	chr1	228271819	-	28	GCGGTGCAGTTGTGTGCGGCCCCTG	P1P2	1382	0.551324	0.710714	0.17135	FALSE
ARF1	chr1	228271866	-	23	GTCTAACACGTGTGACCGCA	P1P2	1429	0.0254568	0.873913	0.318382	FALSE
ARF1	chr1	228271870	-	27	GTCTAACACGTGTGACCGCATGGA	P1P2	1433	0.293064	0.907407	0.298284	FALSE
ARF1	chr1	228271927	-	24	GCCTAGGTAGCCAGAACCATA	P1P2	1490	1.44297	2.57917	0.389062	FALSE
ARF1	chr1	228271953	-	22	GAAATGCCGTACTATTAGC	P1P2	1516	0.148367	1.84091	0.19909	FALSE
ARF1	chr1	228271953	-	27	GTCCTGAAATGCCGTACTATTAGC	P1P2	1516	-0.756753	2.02222	0.19909	FALSE
ARF1	chr1	228271953	-	28	GGTCCTGAAATGCCGTACTATTAGC	P1P2	1516	1.34376	2.05357	0.19909	FALSE
ARF1	chr1	228271954	-	23	GAAATGCCGTACTATTAGCT	P1P2	1517	1.12188	1.8087	0.255997	FALSE
ARF1	chr1	228271954	-	28	GTCCTGAAATGCCGTACTATTAGCT	P1P2	1517	1.10608	1.98929	0.255997	FALSE
ARF1	chr1	228272007	-	27	GTAAATGTTAGTCACACATCTCAT	P1P2	1570	-1.76965	0.996296	0.341006	FALSE
ARF1	chr1	228272048	-	26	GTGTTGTCCATGTTTTCACATGT	P1P2	1611	0.151845	1.50385	0.0782649	FALSE
ARF1	chr1	228272048	-	28	GTGTGTTGTCCATGTTTTCACATGT	P1P2	1611	-0.883173	1.48214	0.0782649	FALSE
ARF1	chr1	228272081	-	24	GAATAGCTGTCACTTGTCTTC	P1P2	1644	-1.00124	1.62083	0.0523117	FALSE
ARF1	chr1	228272081	-	26	GAGAATAGCTGTCACTTGTCTTC	P1P2	1644	-1.0307	1.64231	0.0523117	FALSE
ARF1	chr1	228272081	-	27	GGAGAATAGCTGTCACTTGTCTTC	P1P2	1644	-1.50773	1.65185	0.0523117	FALSE
ARF1	chr1	228272144	-	23	GGAATATGCTGTTGCCTGTG	P1P2	1707	1.02774	0.765217	0.0581617	FALSE
ARF1	chr1	228272144	-	26	GTAGGAATATGCTGTTGCCTGTG	P1P2	1707	-0.45452	0.780769	0.0581617	FALSE
ARF1	chr1	228272155	-	27	GCTGTTGCCTGTGAGGCAGATTTT	P1P2	1718	-0.108168	0.644444	0.210191	FALSE
ARF1	chr1	228272240	-	26	GACTGTGAGTGAAAAGCAAAAAC	P1P2	1803	0.467496	1.86538	0.150309	FALSE
ARF1	chr1	228272263	-	24	GTTCTGTGCCCCTCACAGTTC	P1P2	1826	0.0052841	1.5375	0.0380846	FALSE
ARF1	chr1	228272263	-	25	GGTTCTGTGCCCCTCACAGTTC	P1P2	1826	0.993377	1.544	0.0380846	FALSE
ARF1	chr1	228272280	-	24	GTTCTGGTTTTGTACATCATG	P1P2	1843	-1.05736	1.2375	0.0478003	FALSE
ARF1	chr1	228272291	-	24	GTACATCATGTGGTCTAGCTA	P1P2	1854	-0.46528	1.125	0.0697735	FALSE
ARF1	chr1	228272292	-	25	GTACATCATGTGGTCTAGCTAT	P1P2	1855	-0.806125	1.124	0.324143	FALSE
ARF1	chr1	228272314	-	23	GCTGTACCTCTTGCACAATA	P1P2	1877	4.87232	1.21304	0.296694	FALSE
ARF1	chr1	228272314	-	24	GGCTGTACCTCTTGCACAATA	P1P2	1877	-0.613842	1.20833	0.296694	FALSE
ARF1	chr1	228272314	-	25	GGGCTGTACCTCTTGCACAATA	P1P2	1877	-0.276393	1.204	0.296694	FALSE
ARF1	chr1	228272319	-	25	GTACCTCTTGCACAATATGGAG	P1P2	1882	-0.572948	1.284	0.371344	FALSE
ARF1	chr1	228272319	-	28	GCTGTACCTCTTGCACAATATGGAG	P1P2	1882	0.104387	1.26429	0.371344	FALSE
ARF1	chr1	228272367	-	28	GCTCATCTGCCCCTACGGACCAGAC	P1P2	1930	-0.252416	1.14286	0.204303	FALSE
ARF1	chr1	228272381	-	25	GACCAGACAGGCTTGAAACTAT	P1P2	1944	-0.812353	1.496	0.0802445	FALSE
ARF1	chr1	228272381	-	26	GGACCAGACAGGCTTGAAACTAT	P1P2	1944	1.40625	1.48077	0.0802445	FALSE
ARF1	chr1	228272455	-	23	GTCAGCCGCTGCGGTGATCA	P1P2	2018	1.0203	1.04783	0.0379625	FALSE
ARF1	chr1	228272455	-	27	GACTGTCAGCCGCTGCGGTGATCA	P1P2	2018	0.420092	1.07037	0.0379625	FALSE
ARF1	chr1	228272455	-	28	GGACTGTCAGCCGCTGCGGTGATCA	P1P2	2018	0.185781	1.075	0.0379625	FALSE
ARF1	chr1	228272571	-	27	GATTCTTCAAATTAAATGTCTCCT	P1P2	2134	2.15174	0.807407	0.0534881	FALSE
ARF1	chr1	228272599	-	27	GTATTTAAACCTGCTGTTACTCAC	P1P2	2162	0.28206	1.98889	0.408551	FALSE
ARF1	chr1	228272664	-	27	GCTGTGACCATTCTCCTGAGCAAG	P1P2	2227	0.383731	0.762963	0.450965	FALSE
ARF1	chr1	228272680	-	26	GAGCAAGAGGCTGCAGCCAGCCT	P1P2	2243		0.55	0.0546198	FALSE
ARF1	chr1	228272684	-	28	GCAAGAGGCTGCAGCCAGCCTGGGC	P1P2	2247		0.567857	0.00953059	FALSE
ARF1	chr1	228272687	-	27	GAGGCTGCAGCCAGCCTGGGCTGG	P1P2	2250		0.588889	0.0100917	FALSE
ARF1	chr1	228272688	-	26	GGCTGCAGCCAGCCTGGGCTGGC	P1P2	2251		0.6	0.0163118	FALSE
ARF1	chr1	228272688	-	28	GAGGCTGCAGCCAGCCTGGGCTGGC	P1P2	2251		0.592857	0.0163118	FALSE
ARF1	chr1	228272708	-	23	GGGCCCATACTGTCTCTCAT	P1P2	2271	0.943014	0.786956	0.508438	FALSE
ARF1	chr1	228272708	-	25	GCGGGCCCATACTGTCTCTCAT	P1P2	2271	0.631201	0.78	0.508438	FALSE
ARF1	chr1	228272708	-	26	GGCGGGCCCATACTGTCTCTCAT	P1P2	2271	0.238431	0.776923	0.508438	FALSE
ARF1	chr1	228272750	-	28	GACCTTTCACCTCCGTAAATTCAAG	P1P2	2313	0.0629121	0.935714	0.440469	FALSE
ARF1	chr1	228272787	-	24	GAGTGCACTGTCAAAGATAAT	P1P2	2350	-0.494363	0.679167	0.228354	FALSE
ARF1	chr1	228272788	-	25	GAGTGCACTGTCAAAGATAATT	P1P2	2351	1.15034	0.684	0.183994	FALSE
ARF1	chr1	228272805	-	27	GATAATTGGGAGAGAAACACGAAA	P1P2	2368	2.06033	0.751852	0.484975	FALSE
ARF1	chr1	228272816	-	25	GAAACACGAAAAGGCCTCGCAG	P1P2	2379	2.70638	0.708	0.240844	FALSE
ARF1	chr1	228272816	-	27	GAGAAACACGAAAAGGCCTCGCAG	P1P2	2379	0.865263	0.714815	0.240844	FALSE
ARF1	chr1	228272817	-	26	GAAACACGAAAAGGCCTCGCAGT	P1P2	2380	1.41122	0.707692	0.064631	FALSE
ARF1	chr1	228272817	-	28	GAGAAACACGAAAAGGCCTCGCAGT	P1P2	2380	0.550397	0.714286	0.064631	FALSE
ARF1	chr1	228272818	-	27	GAAACACGAAAAGGCCTCGCAGTG	P1P2	2381	1.23027	0.707407	0.0329142	FALSE
ARF1	chr1	228272875	-	26	GTTGTGCCTGCTCCTCATTGGCG	P1P2	2438	0.0877873	1.33077	0.269719	FALSE
ARF1	chr1	228272875	-	28	GTGTTGTGCCTGCTCCTCATTGGCG	P1P2	2438	-0.475657	1.31786	0.269719	FALSE
ARF1	chr1	228272879	-	25	GCCTGCTCCTCATTGGCGTGGA	P1P2	2442	0.0238648	1.276	0.128799	FALSE
ARF1	chr1	228272879	-	27	GTGCCTGCTCCTCATTGGCGTGGA	P1P2	2442	-0.863932	1.27778	0.128799	FALSE
ARF1	chr1	228272883	-	25	GCTCCTCATTGGCGTGGATGGT	P1P2	2446	-1.16405	1.168	0.0479226	FALSE
ARF1	chr1	228272915	-	27	GCATTCTGCCCGTAGCGTCTGAAG	P1P2	2478	0.184357	1.24815	0.150512	FALSE
ARF1	chr1	228272915	-	28	GGCATTCTGCCCGTAGCGTCTGAAG	P1P2	2478	-0.330877	1.225	0.150512	FALSE
ARF1	chr1	228272923	-	24	GTAGCGTCTGAAGTGGTCTTT	P1P2	2486	2.56904	1.84583	0.0296323	FALSE
ARF1	chr1	228272923	-	28	GCCCGTAGCGTCTGAAGTGGTCTTT	P1P2	2486	-0.112016	1.70714	0.0296323	FALSE
ARF1	chr1	228272934	-	26	GAAGTGGTCTTTTGGAAAAGATT	P1P2	2497	0.0014486	2.29615	0.0207885	FALSE
ARF1	chr1	228272948	-	26	GAAAAGATTTGGCCCCTTCATGT	P1P2	2511	-0.171879	2.37308	0.0193865	FALSE
ARF1	chr1	228272948	-	27	GGAAAAGATTTGGCCCCTTCATGT	P1P2	2511	0.17832	2.37407	0.0193865	FALSE
ARF1	chr1	228272949	-	27	GAAAAGATTTGGCCCCTTCATGTT	P1P2	2512	-0.558395	2.35926	0.125612	FALSE
ARF1	chr1	228272949	-	28	GGAAAAGATTTGGCCCCTTCATGTT	P1P2	2512	1.92976	2.36071	0.125612	FALSE
ARF1	chr1	228272957	-	24	GCCCCTTCATGTTGGGATTCC	P1P2	2520	-0.848474	2.1125	0.00767943	FALSE
ARF1	chr1	228272957	-	25	GGCCCCTTCATGTTGGGATTCC	P1P2	2520	0.298565	2.128	0.00767943	FALSE
ARF1	chr1	228272976	-	28	GATTCCAGGACTTGCCTTCATCCTC	P1P2	2539	0.250442	1.23571	0.0568881	FALSE
ARF1	chr1	228273013	-	24	GTGATTGTTACAAGCTCTCTA	P1P2	2576	-0.189238	1.05417	0.319704	FALSE
ARF1	chr1	228273067	-	25	GCAGCTGCCGCACCGTCCAGAT	P1P2	2630	0.186054	1.052	0.183059	FALSE
ARF1	chr1	228273067	-	27	GCGCAGCTGCCGCACCGTCCAGAT	P1P2	2630	-1.42582	1.04074	0.183059	FALSE
ARF1	chr1	228273088	-	27	GATAGGTAGTTTCACATTCTCAGG	P1P2	2651	0.756882	1.35185	0.495149	FALSE
ARF1	chr1	228273089	-	23	GTAGTTTCACATTCTCAGGT	P1P2	2652	1.04738	1.3913	0.587614	FALSE
ARF1	chr1	228273089	-	24	GGTAGTTTCACATTCTCAGGT	P1P2	2652	0.724516	1.3875	0.587614	FALSE
ARF1	chr1	228273089	-	28	GATAGGTAGTTTCACATTCTCAGGT	P1P2	2652	0.752395	1.36071	0.587614	FALSE
ARF1	chr1	228273128	-	27	GTTAGCGACTTGACAGACATGTCC	P1P2	2691	-0.00941841	1.64444	0.142973	FALSE
ARF1	chr1	228273146	-	25	GTCCTGGATGCTCTTTGTTCCC	P1P2	2709	-0.84895	2.18	0.197568	FALSE
ARF1	chr1	228273149	-	28	GTCCTGGATGCTCTTTGTTCCCAGG	P1P2	2712	-0.664343	2.3	0.770958	FALSE
ARF1	chr1	228273157	-	27	GCTCTTTGTTCCCAGGAGGCTCTC	P1P2	2720	2.62824	2.82222	0.107582	FALSE
ARF1	chr1	228273170	-	26	GGAGGCTCTCAGGTCCTCCCCCA	P1P2	2733	-0.197309	2.7	0.323767	FALSE
ARF1	chr1	228273194	-	25	GTCCTGTCACTCAGCCACCTAC	P1P2	2757	-0.807629	1.352	0.160836	FALSE
ARF1	chr1	228273194	-	26	GGTCCTGTCACTCAGCCACCTAC	P1P2	2757	1.0741	1.36538	0.160836	FALSE
ARF1	chr1	228273194	-	27	GGGTCCTGTCACTCAGCCACCTAC	P1P2	2757	1.2195	1.38148	0.160836	FALSE
ARF1	chr1	228273195	-	26	GTCCTGTCACTCAGCCACCTACA	P1P2	2758	0.0153298	1.35	0.412981	FALSE
ARF1	chr1	228273195	-	27	GGTCCTGTCACTCAGCCACCTACA	P1P2	2758	-0.186804	1.36296	0.412981	FALSE
ARF1	chr1	228273195	-	28	GGGTCCTGTCACTCAGCCACCTACA	P1P2	2758	0.463063	1.37857	0.412981	FALSE
ARF1	chr1	228273199	-	25	GTCACTCAGCCACCTACAGGGA	P1P2	2762	0.301015	1.308	0.0563957	FALSE
ARF1	chr1	228273200	-	26	GTCACTCAGCCACCTACAGGGAT	P1P2	2763	0.87326	1.30769	0.0894096	FALSE
ARF1	chr1	228273201	-	27	GTCACTCAGCCACCTACAGGGATG	P1P2	2764	-1.13404	1.30741	0.0552682	FALSE
ARF1	chr1	228273249	-	26	GCCATAAAGTCCTTGACTAATCC	P1P2	2812	-1.45651	1.01154	0.0873935	FALSE
ARF1	chr1	228273257	-	26	GTCCTTGACTAATCCTGGTTTCC	P1P2	2820	1.18022	0.842308	0.00342635	FALSE
ARF1	chr1	228273271	-	23	GTTTCCTGGTTCTCACACAG	P1P2	2834	1.26545	0.76087	0.446304	FALSE
ARF1	chr1	228273271	-	24	GGTTTCCTGGTTCTCACACAG	P1P2	2834	-0.50091	0.758333	0.446304	FALSE
ARF1	chr1	228273280	-	24	GTTCTCACACAGTGGTAACAA	P1P2	2843		0.770833	0.293307	FALSE
ARF1	chr1	228273280	-	25	GGTTCTCACACAGTGGTAACAA	P1P2	2843	0.314569	0.768	0.293307	FALSE
ARF1	chr1	228273291	-	24	GTGGTAACAAGGGCTTGCAGC	P1P2	2854	-1.65308	0.758333	0.299886	FALSE
ARF1	chr1	228273310	-	24	GCCGGTTGTCAGCCAACAGAC	P1P2	2873	2.15139	1.4125	0.0792124	FALSE
ARF1	chr1	228273310	-	27	GCAGCCGGTTGTCAGCCAACAGAC	P1P2	2873	-0.45211	1.33333	0.0792124	FALSE
ARF1	chr1	228273311	-	25	GCCGGTTGTCAGCCAACAGACT	P1P2	2874	0.352031	1.44	0.0926742	FALSE
ARF1	chr1	228273311	-	28	GCAGCCGGTTGTCAGCCAACAGACT	P1P2	2874	1.1682	1.36071	0.0926742	FALSE
ARF1	chr1	228273332	-	28	GACTGGGAAGGGTGGTGCTTCTTAC	P1P2	2895	0.663537	1.91429	0.24658	FALSE
ARF1	chr1	228273345	-	25	GCTTCTTACAGGCCCTGATAAC	P1P2	2908	-0.621802	1.672	0.0456986	FALSE
ARF1	chr1	228273345	-	27	GTGCTTCTTACAGGCCCTGATAAC	P1P2	2908	-1.58953	1.6963	0.0456986	FALSE
ARF1	chr1	228273345	-	28	GGTGCTTCTTACAGGCCCTGATAAC	P1P2	2908	-2.67941	1.70714	0.0456986	FALSE
ARF1	chr1	228273375	-	26	gcctaaatgacaagagaagagac	P1P2	2938	-1.34048	1.08077	0.193313	FALSE
ARF1	chr1	228273376	-	27	gcctaaatgacaagagaagagaca	P1P2	2939	0.517223	1.07037	0.193313	FALSE
ARF1	chr1	228273389	-	25	gaagagacagggaaagcataaa	P1P2	2952	-1.58102	0.84	0.193313	FALSE
ARF1	chr1	228273389	-	27	gagaagagacagggaaagcataaa	P1P2	2952	1.97003	0.848148	0.193313	FALSE
ARF1	chr1	228273393	-	26	gagacagggaaagcataaaaggc	P1P2	2956	0.229942	0.826923	0.193313	FALSE
ARF1	chr1	228273407	-	28	gcataaaaggcaggcagattttcac	P1P2	2970	1.14822	0.825	0.193313	FALSE
ARF1	chr1	228273439	-	28	gcaattgaaaatgattctgtttaga	P1P2	3002	0.667108	1.26429	0.193313	FALSE
ARF1	chr1	228273504	-	27	gCTGGTGTACAGCATGAAGTGGAC	P1P2	3067	-1.76004	1.43704	0.213	FALSE
ARF1	chr1	228273534	-	27	GTTGATTCAGTCCATGAACATTTC	P1P2	3097	0.570187	0.981481	0.0715339	FALSE
ARF1	chr1	228273557	-	24	GAAGTTAGAAGTCTATAGTTG	P1P2	3120	-0.810499	0.8	0.0873167	FALSE
ARF1	chr1	228273557	-	25	GGAAGTTAGAAGTCTATAGTTG	P1P2	3120	0.730237	0.8	0.0873167	FALSE
ARF1	chr1	228273577	-	27	GTTGTGGattgcaaaatacatatc	P1P2	3140	0.404206	0.911111	0.19519	FALSE
ARF1	chr1	228273662	-	27	gtaccctaatgagttgaccagtga	P1P2	3225	0.0735196	1.20741	0.193313	FALSE
ARF1	chr1	228273663	-	28	gtaccctaatgagttgaccagtgat	P1P2	3226	-0.0302217	1.18929	0.193313	FALSE
ARF1	chr1	228273684	-	27	gatgggcagcccctacgaaacttc	P1P2	3247	0.26014	0.637037	0.193313	FALSE
ARF1	chr1	228273685	-	28	gatgggcagcccctacgaaacttca	P1P2	3248	-0.0255803	0.632143	0.193313	FALSE
ARF1	chr1	228273689	-	24	gcccctacgaaacttcagggt	P1P2	3252	0.450777	0.575	0.193313	FALSE
ARF1	chr1	228273689	-	27	gcagcccctacgaaacttcagggt	P1P2	3252	0.382297	0.588889	0.193313	FALSE
ARF1	chr1	228273689	-	28	ggcagcccctacgaaacttcagggt	P1P2	3252	3.17333	0.592857	0.193313	FALSE
ARF1	chr1	228273690	-	25	gcccctacgaaacttcagggta	P1P2	3253	-2.01319	0.576	0.193313	FALSE
ARF1	chr1	228273690	-	28	gcagcccctacgaaacttcagggta	P1P2	3253	0.408236	0.589286	0.193313	FALSE
ARF1	chr1	228273701	-	28	gaaacttcagggtagggctagtcac	P1P2	3264	1.75878	0.678572	0.193313	FALSE
ARF1	chr1	228273708	-	26	gggtagggctagtcacagggcca	P1P2	3271	0.0215678	0.942308	0.193313	FALSE
ARF1	chr1	228273712	-	25	gggctagtcacagggccaaggc	P1P2	3275	1.08044	1.18	0.193313	FALSE
ARF1	chr1	228273712	-	28	gtagggctagtcacagggccaaggc	P1P2	3275	0.184145	1.10714	0.193313	FALSE
ARF1	chr1	228273754	-	28	gccccaccctccaattttcccagag	P1P2	3317	1.57543	1.18571	0.193313	FALSE
ARF1	chr1	228273777	-	27	gtggagagggactgaagattgagc	P1P2	3340	-1.02317	0.781482	0.193313	FALSE
ARF1	chr1	228273886	-	28	gccccgtgtttccacatttgtacaa	P1P2	3449	0.557389	0.703571	0.193313	FALSE
ARF1	chr1	228273935	-	24	gtacaattttgaaacagcatg	P1P2	3498	0.305756	0.5	0.193313	FALSE
ARF1	chr1	228273939	-	28	gtacaattttgaaacagcatgaggc	P1P2	3502	1.16924	0.457143	0.193313	FALSE
ARF1	chr1	228274266	-	28	gaaacagcatgaaattccttgttga	P1P2	3829	-0.861263	0.3	0.193313	FALSE
ARF1	chr1	228274281	-	23	gttgatgggaaatacccgaa	P1P2	3844	-0.122989	0.521739	0.193313	FALSE
ARF1	chr1	228274290	-	24	gaaatacccgaaaggcctgcc	P1P2	3853	-1.65423	0.5875	0.193313	FALSE
ARF1	chr1	228274290	-	25	ggaaatacccgaaaggcctgcc	P1P2	3853	0.404095	0.584	0.193313	FALSE
ARF1	chr1	228274290	-	26	gggaaatacccgaaaggcctgcc	P1P2	3853	2.65035	0.580769	0.193313	FALSE
ARF1	chr1	228274291	-	25	gaaatacccgaaaggcctgcct	P1P2	3854	0.201388	0.592	0.193313	FALSE
ARF1	chr1	228274291	-	26	ggaaatacccgaaaggcctgcct	P1P2	3854	0.282129	0.588462	0.193313	FALSE
ARF1	chr1	228274291	-	27	gggaaatacccgaaaggcctgcct	P1P2	3854	-0.00272977	0.585185	0.193313	FALSE
ARF1	chr1	228274352	-	28	gaggttcctggagaatggcacagcc	P1P2	3915	1.32342	1.41071	0.193313	FALSE
ARF1	chr1	228274355	-	28	gttcctggagaatggcacagccagg	P1P2	3918	0.155248	1.44643	0.193313	FALSE
ARF1	chr1	228274361	-	25	gaatggcacagccaggagggaa	P1P2	3924	-0.0482998	1.512	0.193313	FALSE
ARF1	chr1	228274361	-	27	gagaatggcacagccaggagggaa	P1P2	3924	0.518896	1.4963	0.193313	FALSE
ARF1	chr1	228274361	-	28	ggagaatggcacagccaggagggaa	P1P2	3924	0.082493	1.48929	0.193313	FALSE
ARF1	chr1	228274517	-	24	gaacccaaggggaaggagtta	P1P2	4080	-0.666148	1.40833	0.193313	FALSE
ARF1	chr1	228274518	-	25	gaacccaaggggaaggagttat	P1P2	4081	-0.0134925	1.404	0.193313	FALSE
ARF1	chr1	228274656	-	24	gtctgctgcagaacgcagaac	P1P2	4219		2.49583	0.193313	FALSE
ARF1	chr1	228274656	-	26	gtgtctgctgcagaacgcagaac	P1P2	4219		2.50385	0.193313	FALSE
ARF1	chr1	228274656	-	27	ggtgtctgctgcagaacgcagaac	P1P2	4219		2.50741	0.193313	FALSE
ARF1	chr1	228274677	-	28	gaactggttgcttgcttggcatgta	P1P2	4240	-0.286247	1.75714	0.193313	FALSE
ARF1	chr1	228274697	-	26	gtagggagaaacccctgctcatg	P1P2	4260	-1.16374	1.59231	0.193313	FALSE
ARF1	chr1	228274746	-	25	gagtgtgtgagaaactgagttt	P1P2	4309	1.29999	0.844	0.193313	FALSE
ARF1	chr1	228274860	-	28	GCAAGCTAGAAAGATTCATTTCCAA	P1P2	4423	1.881	1.08214	0.170861	FALSE
ARF1	chr1	228274861	-	25	GCTAGAAAGATTCATTTCCAAA	P1P2	4424	1.23125	1.116	0.661515	FALSE
ARF1	chr1	228274871	-	27	GATTCATTTCCAAAGGGCTTCCAG	P1P2	4434	-0.208433	1.19259	0.476539	FALSE
ARF1	chr1	228274950	-	23	GCAGTACCATATACGCTATG	P1P2	4513	-0.564344	1.32609	0.447329	FALSE
ARF1	chr1	228274951	-	24	GCAGTACCATATACGCTATGC	P1P2	4514	1.04478	1.30833	0.0472412	FALSE
ARF1	chr1	228274973	-	25	GGGAAACTTTTAAGTATTTTAT	P1P2	4536	0.745476	1.004	0.0535442	FALSE
ARF1	chr1	228274973	-	27	GCGGGAAACTTTTAAGTATTTTAT	P1P2	4536	1.21478	1.00741	0.0535442	FALSE
ARF1	chr1	228275023	-	23	GCTATCATCTATACTCATCC	P1P2	4586	0.707771	1.42174	0.0506558	FALSE
ARF1	chr1	228275023	-	26	GAAGCTATCATCTATACTCATCC	P1P2	4586	1.49601	1.37308	0.0506558	FALSE
ARF1	chr1	228275024	-	24	GCTATCATCTATACTCATCCT	P1P2	4587	-0.110354	1.45833	0.168164	FALSE
ARF1	chr1	228275024	-	27	GAAGCTATCATCTATACTCATCCT	P1P2	4587	0.801381	1.40741	0.168164	FALSE
ARF1	chr1	228275025	-	25	GCTATCATCTATACTCATCCTG	P1P2	4588	-0.539684	1.492	0.471498	FALSE
ARF1	chr1	228275025	-	28	GAAGCTATCATCTATACTCATCCTG	P1P2	4588	-0.152881	1.43929	0.471498	FALSE
ARF1	chr1	228275078	-	28	GCCTGTGCTTTGTACCTTCTGTAGA	P1P2	4641	0.130664	1.16071	0.106646	FALSE
ARF1	chr1	228275079	-	25	GTGCTTTGTACCTTCTGTAGAT	P1P2	4642	0.858679	1.14	0.407891	FALSE
ARF1	chr1	228275160	-	27	GAATACATCTTCTGGCAATTTTGG	P1P2	4723	0.416464	1.20741	0.34099	FALSE
ARF1	chr1	228275588	-	24	GCAATTCCTTGTTGATGCGAT	P1P2	5151	-2.11091	0.333333	0.0939417	FALSE
ARF1	chr1	228275588	-	28	GCATGCAATTCCTTGTTGATGCGAT	P1P2	5151	0.218776	0.360714	0.0939417	FALSE
ARF1	chr1	228275615	-	28	GTTTTTCGTGACGAACTTAATTTTT	P1P2	5178	0.528404	0.710714	0.0328711	FALSE
ARF1	chr1	228275663	-	23	GTTGATCTTCATGAGCCCTA	P1P2	5226	0.104334	0.869565	0.180385	FALSE
ARF1	chr1	228275663	-	28	GTACAGTTGATCTTCATGAGCCCTA	P1P2	5226	-0.373556	0.857143	0.180385	FALSE
ARF1	chr1	228275664	-	24	GTTGATCTTCATGAGCCCTAT	P1P2	5227	0.533834	0.8625	0.188017	FALSE
ARF1	chr1	228275709	-	27	GCCATTGTTTTCTCCTCTCCTTGG	P1P2	5272	0.209522	1.22963	0.234413	FALSE
ARF1	chr1	228275735	-	25	GAGTCACTTGTGCAGTGCCCAG	P1P2	5298	-0.439131	1.3	0.796165	FALSE
ARF1	chr1	228275735	-	27	GTGAGTCACTTGTGCAGTGCCCAG	P1P2	5298	-0.852429	1.31481	0.796165	FALSE
ARF1	chr1	228275735	-	28	GGTGAGTCACTTGTGCAGTGCCCAG	P1P2	5298	0.0735054	1.32143	0.796165	FALSE
ARF1	chr1	228275745	-	26	GTGCAGTGCCCAGCGGAAGAGGG	P1P2	5308	0.808064	1.19615	0.051456	FALSE
ARF1	chr1	228275746	-	27	GTGCAGTGCCCAGCGGAAGAGGGT	P1P2	5309	0.280038	1.1963	0.184185	FALSE
ARF1	chr1	228275749	-	25	GTGCCCAGCGGAAGAGGGTGGG	P1P2	5312	-0.295252	1.18	0.0470426	FALSE
ARF1	chr1	228275749	-	28	GCAGTGCCCAGCGGAAGAGGGTGGG	P1P2	5312	0.298498	1.19286	0.0470426	FALSE
ARF1	chr1	228275753	-	27	GCCCAGCGGAAGAGGGTGGGAGGC	P1P2	5316	0.87589	1.2	0.00493044	FALSE
ARF1	chr1	228275754	-	28	GCCCAGCGGAAGAGGGTGGGAGGCT	P1P2	5317	0.265319	1.21071	0.0253863	FALSE
ARF1	chr1	228275758	-	27	GCGGAAGAGGGTGGGAGGCTGGGG	P1P2	5321	-0.0235409	1.25926	0.103202	FALSE
ARF1	chr1	228275772	-	24	GCTGGGGAGGAAGGCCTGTTC	P1P2	5335	0.098735	1.6125	0.000852147	FALSE
ARF1	chr1	228275772	-	25	GGCTGGGGAGGAAGGCCTGTTC	P1P2	5335	1.17449	1.6	0.000852147	FALSE
ARF1	chr1	228275772	-	27	GAGGCTGGGGAGGAAGGCCTGTTC	P1P2	5335	-0.646604	1.57037	0.000852147	FALSE
ARF1	chr1	228275772	-	28	GGAGGCTGGGGAGGAAGGCCTGTTC	P1P2	5335	-0.780614	1.55714	0.000852147	FALSE
ARF1	chr1	228275773	-	25	GCTGGGGAGGAAGGCCTGTTCT	P1P2	5336	0.561412	1.612	0.0137061	FALSE
ARF1	chr1	228275773	-	26	GGCTGGGGAGGAAGGCCTGTTCT	P1P2	5336	0.387799	1.6	0.0137061	FALSE
ARF1	chr1	228275773	-	28	GAGGCTGGGGAGGAAGGCCTGTTCT	P1P2	5336	-0.176651	1.57143	0.0137061	FALSE
ARF1	chr1	228275779	-	25	GAGGAAGGCCTGTTCTGGGCAA	P1P2	5342	0.591854	1.632	0.260164	FALSE
ARF1	chr1	228275779	-	26	GGAGGAAGGCCTGTTCTGGGCAA	P1P2	5342	-0.162491	1.62692	0.260164	FALSE
ARF1	chr1	228275779	-	27	GGGAGGAAGGCCTGTTCTGGGCAA	P1P2	5342	-0.627352	1.61852	0.260164	FALSE
ARF1	chr1	228275779	-	28	GGGGAGGAAGGCCTGTTCTGGGCAA	P1P2	5342	0.5152	1.61071	0.260164	FALSE
ARF1	chr1	228275803	-	25	GAAGCCCTGCTTGATGAGCATG	P1P2	5366	-0.626691	1.152	0.0609904	FALSE
ARF1	chr1	228275803	-	26	GGAAGCCCTGCTTGATGAGCATG	P1P2	5366	-0.887055	1.16154	0.0609904	FALSE
ARF1	chr1	228275811	-	25	GCTTGATGAGCATGAGGCTCCA	P1P2	5374	-0.453026	1.144	0.282039	FALSE
ARF1	chr1	228275812	-	26	GCTTGATGAGCATGAGGCTCCAC	P1P2	5375	-0.695378	1.14615	0.0892561	FALSE
ARF1	chr1	228275813	-	27	GCTTGATGAGCATGAGGCTCCACG	P1P2	5376	0.148727	1.14815	0.857606	FALSE
ARF1	chr1	228275814	-	24	GATGAGCATGAGGCTCCACGG	P1P2	5377	-0.244844	1.1625	0.658067	FALSE
ARF1	chr1	228275814	-	28	GCTTGATGAGCATGAGGCTCCACGG	P1P2	5377	0.834289	1.15	0.658067	FALSE
ARF1	chr1	228275820	-	25	GCATGAGGCTCCACGGGGGCAG	P1P2	5383	0.232406	1.152	0.201313	FALSE
ARF1	chr1	228275820	-	27	GAGCATGAGGCTCCACGGGGGCAG	P1P2	5383	2.04346	1.14815	0.201313	FALSE
ARF1	chr1	228275829	-	27	GCTCCACGGGGGCAGTGGCTGTGA	P1P2	5392	-0.524423	1.03704	0.0769931	FALSE
ARF1	chr1	228275829	-	28	GGCTCCACGGGGGCAGTGGCTGTGA	P1P2	5392	-2.12174	1.04286	0.0769931	FALSE
ARF1	chr1	228265360	+	26	GACTGGGAGACAGACGGGGTCTG	P1P2	-5077	-1.01737	3.01923	0.0328732	FALSE
ARF1	chr1	228265360	+	27	GGACTGGGAGACAGACGGGGTCTG	P1P2	-5077	0.204508	3.02593	0.0328732	FALSE
ARF1	chr1	228265360	+	28	GGGACTGGGAGACAGACGGGGTCTG	P1P2	-5077	0.841869	3.03214	0.0328732	FALSE
ARF1	chr1	228265367	+	28	GCAACCAGGGACTGGGAGACAGACG	P1P2	-5070	-1.4304	3.07857	0.203017	FALSE
ARF1	chr1	228265368	+	27	GCAACCAGGGACTGGGAGACAGAC	P1P2	-5069	0.556341	3.08519	0.0953282	FALSE
ARF1	chr1	228265368	+	28	GGCAACCAGGGACTGGGAGACAGAC	P1P2	-5069	-0.0341002	3.075	0.0953282	FALSE
ARF1	chr1	228265369	+	26	GCAACCAGGGACTGGGAGACAGA	P1P2	-5068	-0.516945	3.09231	0.225066	FALSE
ARF1	chr1	228265369	+	27	GGCAACCAGGGACTGGGAGACAGA	P1P2	-5068	-1.73356	3.08148	0.225066	FALSE
ARF1	chr1	228265369	+	28	GGGCAACCAGGGACTGGGAGACAGA	P1P2	-5068	1.22784	3.07143	0.225066	FALSE
ARF1	chr1	228265379	+	27	GCTCTCTGGGGGCAACCAGGGACT	P1P2	-5058	-0.538311	2.91481	0.0874551	FALSE
ARF1	chr1	228265380	+	26	GCTCTCTGGGGGCAACCAGGGAC	P1P2	-5057	1.64609	2.90385	0.00787286	FALSE
ARF1	chr1	228265380	+	28	GAGCTCTCTGGGGGCAACCAGGGAC	P1P2	-5057	1.18723	2.86786	0.00787286	FALSE
ARF1	chr1	228265385	+	27	GTCAGAGCTCTCTGGGGGCAACCA	P1P2	-5052	1.74984	2.72593	0.478104	FALSE
ARF1	chr1	228265386	+	26	GTCAGAGCTCTCTGGGGGCAACC	P1P2	-5051	1.56321	2.70769	0.0482849	FALSE
ARF1	chr1	228265386	+	28	GAGTCAGAGCTCTCTGGGGGCAACC	P1P2	-5051	1.39479	2.67857	0.0482849	FALSE
ARF1	chr1	228265394	+	28	GCCTTTTTGAGTCAGAGCTCTCTGG	P1P2	-5043	0.471247	2.44643	0.653195	FALSE
ARF1	chr1	228265395	+	27	GCCTTTTTGAGTCAGAGCTCTCTG	P1P2	-5042	-0.130424	2.42963	0.422494	FALSE
ARF1	chr1	228265395	+	28	GGCCTTTTTGAGTCAGAGCTCTCTG	P1P2	-5042	0.797262	2.42143	0.422494	FALSE
ARF1	chr1	228265396	+	26	GCCTTTTTGAGTCAGAGCTCTCT	P1P2	-5041	0.506878	2.41538	0.0150016	FALSE
ARF1	chr1	228265396	+	27	GGCCTTTTTGAGTCAGAGCTCTCT	P1P2	-5041	1.12468	2.40741	0.0150016	FALSE
ARF1	chr1	228265396	+	28	GGGCCTTTTTGAGTCAGAGCTCTCT	P1P2	-5041	-1.41583	2.4	0.0150016	FALSE
ARF1	chr1	228265397	+	25	GCCTTTTTGAGTCAGAGCTCTC	P1P2	-5040	0.92018	2.4	0.0219779	FALSE
ARF1	chr1	228265397	+	26	GGCCTTTTTGAGTCAGAGCTCTC	P1P2	-5040	-1.5649	2.39231	0.0219779	FALSE
ARF1	chr1	228265397	+	27	GGGCCTTTTTGAGTCAGAGCTCTC	P1P2	-5040	1.97031	2.38519	0.0219779	FALSE
ARF1	chr1	228265421	+	24	GTGTGGAGCTACTTTGCTCTA	P1P2	-5016	0.059971	1.90417	0.419211	FALSE
ARF1	chr1	228265421	+	25	GGTGTGGAGCTACTTTGCTCTA	P1P2	-5016	1.18339	1.884	0.419211	FALSE
ARF1	chr1	228265421	+	28	GAAGGTGTGGAGCTACTTTGCTCTA	P1P2	-5016	-0.117808	1.83214	0.419211	FALSE
ARF1	chr1	228265422	+	23	GTGTGGAGCTACTTTGCTCT	P1P2	-5015	-0.393928	1.8913	0.0228607	FALSE
ARF1	chr1	228265422	+	24	GGTGTGGAGCTACTTTGCTCT	P1P2	-5015	-0.033234	1.87083	0.0228607	FALSE
ARF1	chr1	228265422	+	27	GAAGGTGTGGAGCTACTTTGCTCT	P1P2	-5015	0.947711	1.81852	0.0228607	FALSE
ARF1	chr1	228265444	+	25	GGCTTTGAAGAGACATGGCTGA	P1P2	-4993	0.703357	1.7	0.2512	FALSE
ARF1	chr1	228265451	+	25	GCCCCACGGCTTTGAAGAGACA	P1P2	-4986	0.0636856	2.052	0.282872	FALSE
ARF1	chr1	228265451	+	28	GCTGCCCCACGGCTTTGAAGAGACA	P1P2	-4986	0.275285	2.13929	0.282872	FALSE
ARF1	chr1	228265467	+	25	GAATGCACTGGGTGCTGCCCCA	P1P2	-4970	0.678406	2.828	0.261059	FALSE
ARF1	chr1	228265467	+	26	GGAATGCACTGGGTGCTGCCCCA	P1P2	-4970	0.763165	2.83077	0.261059	FALSE
ARF1	chr1	228265467	+	27	GGGAATGCACTGGGTGCTGCCCCA	P1P2	-4970	-0.0693872	2.82963	0.261059	FALSE
ARF1	chr1	228265480	+	26	GCTCAGAGCCCTGGGAATGCACT	P1P2	-4957	-0.508598	2.73077	0.206216	FALSE
ARF1	chr1	228265480	+	28	GAGCTCAGAGCCCTGGGAATGCACT	P1P2	-4957	-0.959242	2.675	0.206216	FALSE
ARF1	chr1	228265481	+	25	GCTCAGAGCCCTGGGAATGCAC	P1P2	-4956	1.54733	2.724	0.215122	FALSE
ARF1	chr1	228265481	+	27	GAGCTCAGAGCCCTGGGAATGCAC	P1P2	-4956	-0.0172046	2.66667	0.215122	FALSE
ARF1	chr1	228265491	+	28	GACCTGTATCTGAGCTCAGAGCCCT	P1P2	-4946	0.728831	1.98929	0.364294	FALSE
ARF1	chr1	228265492	+	27	GACCTGTATCTGAGCTCAGAGCCC	P1P2	-4945	0.675811	1.95556	0.129535	FALSE
ARF1	chr1	228265529	+	28	GCTCAAGGCCTGCCTGGGATCTCCT	P1P2	-4908	-2.27153	0.235714	0.190226	FALSE
ARF1	chr1	228265539	+	26	GCCCTACAGCTCAAGGCCTGCCT	P1P2	-4898	-0.359329	0.323077	0.336652	FALSE
ARF1	chr1	228265540	+	25	GCCCTACAGCTCAAGGCCTGCC	P1P2	-4897	0.19488	0.328	0.0388322	FALSE
ARF1	chr1	228265549	+	26	GACCAACTTTGCCCTACAGCTCA	P1P2	-4888	0.158125	0.619231	0.0134176	FALSE
ARF1	chr1	228265549	+	28	GTGACCAACTTTGCCCTACAGCTCA	P1P2	-4888	-0.326302	0.678571	0.0134176	FALSE
ARF1	chr1	228265602	+	27	GATCTTTCCGGTCTACTTCCAGGC	P1P2	-4835	0.915222	1.17037	0.343457	FALSE
ARF1	chr1	228265602	+	28	GGATCTTTCCGGTCTACTTCCAGGC	P1P2	-4835	0.542034	1.175	0.343457	FALSE
ARF1	chr1	228265606	+	23	GATCTTTCCGGTCTACTTCC	P1P2	-4831	-0.47155	1.14783	0.185988	FALSE
ARF1	chr1	228265606	+	24	GGATCTTTCCGGTCTACTTCC	P1P2	-4831	0.613792	1.15417	0.185988	FALSE
ARF1	chr1	228265606	+	25	GGGATCTTTCCGGTCTACTTCC	P1P2	-4831	-2.97267	1.16	0.185988	FALSE
ARF1	chr1	228265606	+	27	GAGGGATCTTTCCGGTCTACTTCC	P1P2	-4831	0.505846	1.17037	0.185988	FALSE
ARF1	chr1	228265618	+	27	GATCCTGGGGGAGAGGGATCTTTC	P1P2	-4819	-0.239413	1.25185	0.0505033	FALSE
ARF1	chr1	228265618	+	28	GGATCCTGGGGGAGAGGGATCTTTC	P1P2	-4819	1.6421	1.25357	0.0505033	FALSE
ARF1	chr1	228265645	+	28	gctacttgagccttgagacccccgg	P1P2	-4792	0.595412	1.08214	0.107394	FALSE
ARF1	chr1	228265646	+	27	gctacttgagccttgagacccccg	P1P2	-4791	1.00694	1.07407	0.107394	FALSE
ARF1	chr1	228265646	+	28	ggctacttgagccttgagacccccg	P1P2	-4791	0.0355492	1.06071	0.107394	FALSE
ARF1	chr1	228265647	+	26	gctacttgagccttgagaccccc	P1P2	-4790	1.15148	1.06538	0.0809851	FALSE
ARF1	chr1	228265647	+	27	ggctacttgagccttgagaccccc	P1P2	-4790	0.736629	1.05185	0.0809851	FALSE
ARF1	chr1	228265648	+	25	gctacttgagccttgagacccc	P1P2	-4789	0.379413	1.056	0.14931	FALSE
ARF1	chr1	228265648	+	26	ggctacttgagccttgagacccc	P1P2	-4789	0.355341	1.04231	0.14931	FALSE
ARF1	chr1	228265813	+	28	GACACTCCCTTCTGCCCGTGGGACT	P1P2	-4624	1.00926	0.810714	0.00684306	FALSE
ARF1	chr1	228265819	+	22	GACACTCCCTTCTGCCCGT	P1P2	-4618	-0.221158	0.922727	0.549727	FALSE
ARF1	chr1	228265819	+	23	GGACACTCCCTTCTGCCCGT	P1P2	-4618	-0.755892	0.973913	0.549727	FALSE
ARF1	chr1	228265840	+	26	GACTGTGGGCCTCTGCCTACTTT	P1P2	-4597	-0.402725	3.72308	0.118164	FALSE
ARF1	chr1	228265857	+	27	GACTCAGACAGTGGCCCTGACTGT	P1P2	-4580	-0.257039	5.1963	0.0979177	FALSE
ARF1	chr1	228265857	+	28	GGACTCAGACAGTGGCCCTGACTGT	P1P2	-4580	0.895804	5.15714	0.0979177	FALSE
ARF1	chr1	228265858	+	26	GACTCAGACAGTGGCCCTGACTG	P1P2	-4579	-0.124895	5.22692	0.0769818	FALSE
ARF1	chr1	228265858	+	27	GGACTCAGACAGTGGCCCTGACTG	P1P2	-4579	-0.051265	5.18519	0.0769818	FALSE
ARF1	chr1	228265883	+	28	GCACACATGAGCCTTCTGCCTGTCC	P1P2	-4554	0.592815	1.975	0.0156801	FALSE
ARF1	chr1	228265920	+	26	GAAACCCCACTTGTCAGCTAGAG	P1P2	-4517	1.41656	1.68846	0.0601596	FALSE
ARF1	chr1	228265920	+	28	GTGAAACCCCACTTGTCAGCTAGAG	P1P2	-4517	0.0794279	1.68214	0.0601596	FALSE
ARF1	chr1	228265947	+	23	GCATCACTTATCGTAGGCAT	P1P2	-4490	-1.07846	1.68696	0.448375	FALSE
ARF1	chr1	228265947	+	25	GTGCATCACTTATCGTAGGCAT	P1P2	-4490	-0.57754	1.688	0.448375	FALSE
ARF1	chr1	228265953	+	24	GTCCCGTGCATCACTTATCGT	P1P2	-4484	-1.85679	1.7	0.331626	FALSE
ARF1	chr1	228265990	+	26	GCCACAAGTCTTAAAGTGTCTGA	P1P2	-4447	-0.0677513	1.55385	0.175325	FALSE
ARF1	chr1	228266049	+	25	GTACCGATCCACTCCTCCTATC	P1P2	-4388	0.038115	3.324	0.0553504	FALSE
ARF1	chr1	228266110	+	24	GCGGCCTGGTTTTATCATTTC	P1P2	-4327	0.228104	0.733333	0.0395548	FALSE
ARF1	chr1	228266110	+	25	GGCGGCCTGGTTTTATCATTTC	P1P2	-4327	0.696119	0.74	0.0395548	FALSE
ARF1	chr1	228266110	+	27	GAGGCGGCCTGGTTTTATCATTTC	P1P2	-4327	0.302065	0.751852	0.0395548	FALSE
ARF1	chr1	228266144	+	23	GTTTATACTCCTCGATCAAC	P1P2	-4293	-0.89348	1	0.156007	FALSE
ARF1	chr1	228266466	+	27	GAGGGATTGCagaaaagcacatct	P1P2	-3971	0.217795	3.45926	0.368572	FALSE
ARF1	chr1	228266466	+	28	GGAGGGATTGCagaaaagcacatct	P1P2	-3971	0.0726415	3.43571	0.368572	FALSE
ARF1	chr1	228266488	+	25	GGTGAGGTGAGCACCCTGGGGA	P1P2	-3949	1.55855	2.744	0.28531	FALSE
ARF1	chr1	228266488	+	28	GCCGGTGAGGTGAGCACCCTGGGGA	P1P2	-3949	2.17987	2.68214	0.28531	FALSE
ARF1	chr1	228266489	+	27	GCCGGTGAGGTGAGCACCCTGGGG	P1P2	-3948	0.590692	2.67778	0.0714726	FALSE
ARF1	chr1	228266492	+	28	GGGAGCCGGTGAGGTGAGCACCCTG	P1P2	-3945	0.423867	2.57143	0.0355842	FALSE
ARF1	chr1	228266493	+	23	GCCGGTGAGGTGAGCACCCT	P1P2	-3944	0.446032	2.65652	0.0310337	FALSE
ARF1	chr1	228266493	+	25	GAGCCGGTGAGGTGAGCACCCT	P1P2	-3944	-0.216593	2.608	0.0310337	FALSE
ARF1	chr1	228266493	+	26	GGAGCCGGTGAGGTGAGCACCCT	P1P2	-3944	1.97478	2.58462	0.0310337	FALSE
ARF1	chr1	228266493	+	27	GGGAGCCGGTGAGGTGAGCACCCT	P1P2	-3944	0.100776	2.56296	0.0310337	FALSE
ARF1	chr1	228266493	+	28	GGGGAGCCGGTGAGGTGAGCACCCT	P1P2	-3944	-0.0577915	2.54286	0.0310337	FALSE
ARF1	chr1	228266494	+	24	GAGCCGGTGAGGTGAGCACCC	P1P2	-3943	-0.34802	2.6	0.050726	FALSE
ARF1	chr1	228266494	+	25	GGAGCCGGTGAGGTGAGCACCC	P1P2	-3943	1.02281	2.576	0.050726	FALSE
ARF1	chr1	228266494	+	26	GGGAGCCGGTGAGGTGAGCACCC	P1P2	-3943	1.66121	2.55385	0.050726	FALSE
ARF1	chr1	228266494	+	27	GGGGAGCCGGTGAGGTGAGCACCC	P1P2	-3943	0.00891571	2.53333	0.050726	FALSE
ARF1	chr1	228266506	+	22	GACAAATGGGGAGCCGGTG	P1P2	-3931	-0.379645	2.21364	0.0933168	FALSE
ARF1	chr1	228266506	+	23	GGACAAATGGGGAGCCGGTG	P1P2	-3931	0.334619	2.21739	0.0933168	FALSE
ARF1	chr1	228266506	+	25	GTGGACAAATGGGGAGCCGGTG	P1P2	-3931	0.249936	2.228	0.0933168	FALSE
ARF1	chr1	228266506	+	26	GGTGGACAAATGGGGAGCCGGTG	P1P2	-3931	0.132053	2.23462	0.0933168	FALSE
ARF1	chr1	228266506	+	27	GGGTGGACAAATGGGGAGCCGGTG	P1P2	-3931	-0.679875	2.24444	0.0933168	FALSE
ARF1	chr1	228266511	+	26	GCCTGGGTGGACAAATGGGGAGC	P1P2	-3926	0.553931	2.23462	0.017754	FALSE
ARF1	chr1	228266517	+	25	GTCATGCCTGGGTGGACAAATG	P1P2	-3920	0.0072761	2.312	0.0537981	FALSE
ARF1	chr1	228266518	+	24	GTCATGCCTGGGTGGACAAAT	P1P2	-3919	-0.13573	2.325	0.221176	FALSE
ARF1	chr1	228266527	+	28	GTTCCAGCCTATTGTCATGCCTGGG	P1P2	-3910	-0.422098	2.34643	0.0847558	FALSE
ARF1	chr1	228266530	+	25	GTTCCAGCCTATTGTCATGCCT	P1P2	-3907	0.463587	2.356	0.341235	FALSE
ARF1	chr1	228266530	+	26	GGTTCCAGCCTATTGTCATGCCT	P1P2	-3907	-1.65586	2.33077	0.341235	FALSE
ARF1	chr1	228266531	+	24	GTTCCAGCCTATTGTCATGCC	P1P2	-3906	-0.636689	2.35417	0.0559497	FALSE
ARF1	chr1	228266531	+	25	GGTTCCAGCCTATTGTCATGCC	P1P2	-3906	-0.824889	2.328	0.0559497	FALSE
ARF1	chr1	228266570	+	24	GCAGGCTGGCTTCTCAGGGAA	P1P2	-3867	-0.667179	0.591667	0.0607147	FALSE
ARF1	chr1	228266570	+	25	GGCAGGCTGGCTTCTCAGGGAA	P1P2	-3867	0.174424	0.584	0.0607147	FALSE
ARF1	chr1	228266576	+	28	GTTTTCCCAGGCAGGCTGGCTTCTC	P1P2	-3861	-0.369488	0.528571	0.0013636	FALSE
ARF1	chr1	228266585	+	25	GACCTTGTTTTCCCAGGCAGGC	P1P2	-3852	1.9693	0.612	0.0609849	FALSE
ARF1	chr1	228266585	+	26	GGACCTTGTTTTCCCAGGCAGGC	P1P2	-3852	2.43398	0.638462	0.0609849	FALSE
ARF1	chr1	228266585	+	27	GGGACCTTGTTTTCCCAGGCAGGC	P1P2	-3852	2.12033	0.666667	0.0609849	FALSE
ARF1	chr1	228266585	+	28	GGGGACCTTGTTTTCCCAGGCAGGC	P1P2	-3852	2.18522	0.696429	0.0609849	FALSE
ARF1	chr1	228266593	+	27	GCTCTCAGGGGACCTTGTTTTCCC	P1P2	-3844	0.58176	1.17778	0.22609	FALSE
ARF1	chr1	228266609	+	28	GTCCCTCCCCTGGACTAGCTCTCAG	P1P2	-3828	-0.453269	3.40357	0.470824	FALSE
ARF1	chr1	228266610	+	27	GTCCCTCCCCTGGACTAGCTCTCA	P1P2	-3827	0.0282067	3.48519	0.00567118	FALSE
ARF1	chr1	228266611	+	26	GTCCCTCCCCTGGACTAGCTCTC	P1P2	-3826	1.40305	3.56923	0.0376341	FALSE
ARF1	chr1	228266741	+	27	GTTTGCTCACAGTCGTCTGATTTC	P1P2	-3696	2.27477	0.662963	0.143512	FALSE
ARF1	chr1	228266769	+	23	GTTGAGTTCCGTGAACTCCA	P1P2	-3668	0.844995	0.530435	0.868961	FALSE
ARF1	chr1	228266800	+	24	GCCTGCACTACACAGTGGCTT	P1P2	-3637	-0.00434516	1.4125	0.270563	FALSE
ARF1	chr1	228266800	+	28	GCTTGCCTGCACTACACAGTGGCTT	P1P2	-3637	-0.836185	1.39643	0.270563	FALSE
ARF1	chr1	228266806	+	25	GCGGCTTGCCTGCACTACACAG	P1P2	-3631	-0.707978	1.408	0.519269	FALSE
ARF1	chr1	228266827	+	24	GGCCAGTGGTGAGGGTCCCAG	P1P2	-3610	-1.23661	1.1375	0.71966	FALSE
ARF1	chr1	228266827	+	26	GTGGCCAGTGGTGAGGGTCCCAG	P1P2	-3610	1.05849	1.13462	0.71966	FALSE
ARF1	chr1	228266827	+	27	GGTGGCCAGTGGTGAGGGTCCCAG	P1P2	-3610	-0.518812	1.13333	0.71966	FALSE
ARF1	chr1	228266836	+	26	GGGAAGCCGGTGGCCAGTGGTGA	P1P2	-3601	1.2229	1.10385	0.123137	FALSE
ARF1	chr1	228266837	+	24	GGAAGCCGGTGGCCAGTGGTG	P1P2	-3600	1.13789	1.1	0.047166	FALSE
ARF1	chr1	228266837	+	25	GGGAAGCCGGTGGCCAGTGGTG	P1P2	-3600	-1.29195	1.104	0.047166	FALSE
ARF1	chr1	228266842	+	27	GTCATTCGGGAAGCCGGTGGCCAG	P1P2	-3595	0.0991491	1.18889	0.0955058	FALSE
ARF1	chr1	228266842	+	28	GGTCATTCGGGAAGCCGGTGGCCAG	P1P2	-3595	1.44707	1.21071	0.0955058	FALSE
ARF1	chr1	228266849	+	27	GTCTGGGGTCATTCGGGAAGCCGG	P1P2	-3588	0.64528	1.45556	0.147242	FALSE
ARF1	chr1	228266849	+	28	GGTCTGGGGTCATTCGGGAAGCCGG	P1P2	-3588	0.750281	1.49643	0.147242	FALSE
ARF1	chr1	228266852	+	24	GTCTGGGGTCATTCGGGAAGC	P1P2	-3585	1.14561	1.5	0.136996	FALSE
ARF1	chr1	228266852	+	25	GGTCTGGGGTCATTCGGGAAGC	P1P2	-3585	1.19841	1.544	0.136996	FALSE
ARF1	chr1	228266852	+	26	GGGTCTGGGGTCATTCGGGAAGC	P1P2	-3585	2.75509	1.58846	0.136996	FALSE
ARF1	chr1	228266852	+	27	GGGGTCTGGGGTCATTCGGGAAGC	P1P2	-3585	1.5342	1.63333	0.136996	FALSE
ARF1	chr1	228266859	+	23	GCTGGGGTCTGGGGTCATTC	P1P2	-3578	-0.789561	1.96087	0.23878	FALSE
ARF1	chr1	228266859	+	24	GGCTGGGGTCTGGGGTCATTC	P1P2	-3578	-0.558637	2.00417	0.23878	FALSE
ARF1	chr1	228266859	+	25	GGGCTGGGGTCTGGGGTCATTC	P1P2	-3578	-0.0570844	2.044	0.23878	FALSE
ARF1	chr1	228266860	+	28	GCCTGGGCTGGGGTCTGGGGTCATT	P1P2	-3577	0.982735	2.21429	0.0630586	FALSE
ARF1	chr1	228266869	+	28	GCCTTCTGGGCCTGGGCTGGGGTCT	P1P2	-3568	1.69739	2.63929	0.00084876	FALSE
ARF1	chr1	228266875	+	27	GCCCTGCCTTCTGGGCCTGGGCTG	P1P2	-3562	-0.333079	2.66667	0.0861749	FALSE
ARF1	chr1	228266882	+	28	GTGGCCCTGCCCTGCCTTCTGGGCC	P1P2	-3555	0.236426	2.35714	0.0127552	FALSE
ARF1	chr1	228266906	+	28	GAAGCCCCCACCTCCCAGCTCAGGG	P1P2	-3531	1.58216	1.35357	0.285277	FALSE
ARF1	chr1	228266909	+	27	GAGAAGCCCCCACCTCCCAGCTCA	P1P2	-3528	0.115271	1.3	0.0511774	FALSE
ARF1	chr1	228266909	+	28	GGAGAAGCCCCCACCTCCCAGCTCA	P1P2	-3528	0.86333	1.28571	0.0511774	FALSE
ARF1	chr1	228266910	+	26	GAGAAGCCCCCACCTCCCAGCTC	P1P2	-3527	0.348066	1.29231	0.0188734	FALSE
ARF1	chr1	228266910	+	27	GGAGAAGCCCCCACCTCCCAGCTC	P1P2	-3527	0.490566	1.27778	0.0188734	FALSE
ARF1	chr1	228266910	+	28	GGGAGAAGCCCCCACCTCCCAGCTC	P1P2	-3527	0.28417	1.26429	0.0188734	FALSE
ARF1	chr1	228266935	+	26	GCTATGCTGACTGCATGGGCCCT	P1P2	-3502	0.246079	0.842308	0.0202492	FALSE
ARF1	chr1	228266935	+	27	GGCTATGCTGACTGCATGGGCCCT	P1P2	-3502	-0.580763	0.844444	0.0202492	FALSE
ARF1	chr1	228266936	+	25	GCTATGCTGACTGCATGGGCCC	P1P2	-3501	-0.112681	0.84	0.055648	FALSE
ARF1	chr1	228266936	+	26	GGCTATGCTGACTGCATGGGCCC	P1P2	-3501	0.0447804	0.842308	0.055648	FALSE
ARF1	chr1	228266960	+	23	GCACGCCACAGGAATTATTA	P1P2	-3477	1.62058	0.991304	0.379742	FALSE
ARF1	chr1	228266960	+	25	GAGCACGCCACAGGAATTATTA	P1P2	-3477	2.55919	1	0.379742	FALSE
ARF1	chr1	228266960	+	26	GGAGCACGCCACAGGAATTATTA	P1P2	-3477	-0.0203365	1.00385	0.379742	FALSE
ARF1	chr1	228267006	+	27	GACCCCTACCCAAAGCCTACCCTC	P1P2	-3431	0.273366	1.25926	0.243826	FALSE
ARF1	chr1	228267095	+	28	GAACTCATACCCTTAAAGACTTCTC	P1P2	-3342	0.777976	2.60714	0.0180358	FALSE
ARF1	chr1	228267163	+	23	GTACTTCCTCCTCACGCTCA	P1P2	-3274	-0.618391	0.878261	0.371369	FALSE
ARF1	chr1	228267163	+	27	GTCAGTACTTCCTCCTCACGCTCA	P1P2	-3274	0.288597	0.925926	0.371369	FALSE
ARF1	chr1	228267164	+	26	GTCAGTACTTCCTCCTCACGCTC	P1P2	-3273	-1.58535	0.942308	0.0413323	FALSE
ARF1	chr1	228267164	+	28	GAGTCAGTACTTCCTCCTCACGCTC	P1P2	-3273	0.84666	0.960714	0.0413323	FALSE
ARF1	chr1	228267209	+	26	GCAAGATGCCAGGGTGTTCTGCA	P1P2	-3228		1.85385	0.475408	FALSE
ARF1	chr1	228267210	+	25	GCAAGATGCCAGGGTGTTCTGC	P1P2	-3227	-1.1166	1.868	0.0316434	FALSE
ARF1	chr1	228267221	+	24	GAATCACACTGCAAGATGCCA	P1P2	-3216	-0.504548	2.09167	0.524828	FALSE
ARF1	chr1	228267221	+	26	GAGAATCACACTGCAAGATGCCA	P1P2	-3216	0.342608	2.11923	0.524828	FALSE
ARF1	chr1	228267221	+	27	GGAGAATCACACTGCAAGATGCCA	P1P2	-3216	-0.19716	2.13333	0.524828	FALSE
ARF1	chr1	228267222	+	25	GAGAATCACACTGCAAGATGCC	P1P2	-3215	0.342957	2.128	0.105074	FALSE
ARF1	chr1	228267222	+	26	GGAGAATCACACTGCAAGATGCC	P1P2	-3215	-0.185263	2.14231	0.105074	FALSE
ARF1	chr1	228267246	+	23	GACTCTAGGTGGGCTAAAGC	P1P2	-3191	-0.197805	2.81304	0.0250656	FALSE
ARF1	chr1	228267246	+	25	GAGACTCTAGGTGGGCTAAAGC	P1P2	-3191	1.13273	2.808	0.0250656	FALSE
ARF1	chr1	228267246	+	26	GGAGACTCTAGGTGGGCTAAAGC	P1P2	-3191	0.502145	2.80385	0.0250656	FALSE
ARF1	chr1	228267246	+	27	GGGAGACTCTAGGTGGGCTAAAGC	P1P2	-3191	2.06179	2.8	0.0250656	FALSE
ARF1	chr1	228267257	+	28	GCTCTCTCTGTTGGGAGACTCTAGG	P1P2	-3180	-0.593871	2.66429	0.0877244	FALSE
ARF1	chr1	228267260	+	25	GCTCTCTCTGTTGGGAGACTCT	P1P2	-3177	0.0172335	2.632	0.0964756	FALSE
ARF1	chr1	228267270	+	24	GCTCTGCCCGCTCTCTCTGTT	P1P2	-3167	-1.67449	2.35833	0.10331	FALSE
ARF1	chr1	228267270	+	27	GTTGCTCTGCCCGCTCTCTCTGTT	P1P2	-3167	-0.207608	2.34074	0.10331	FALSE
ARF1	chr1	228267270	+	28	GGTTGCTCTGCCCGCTCTCTCTGTT	P1P2	-3167	-0.248187	2.33571	0.10331	FALSE
ARF1	chr1	228267271	+	26	GTTGCTCTGCCCGCTCTCTCTGT	P1P2	-3166	0.11184	2.32692	0.037782	FALSE
ARF1	chr1	228267271	+	27	GGTTGCTCTGCCCGCTCTCTCTGT	P1P2	-3166	2.65689	2.32222	0.037782	FALSE
ARF1	chr1	228267345	+	27	gctcactactacaccaggcatccc	P1P2	-3092	1.56717	1.05556	0.169515	FALSE
ARF1	chr1	228267354	+	26	gatggggagctcactactacacc	P1P2	-3083	1.53944	0.892308	0.193313	FALSE
ARF1	chr1	228267354	+	28	gtgatggggagctcactactacacc	P1P2	-3083	-0.372592	0.892857	0.193313	FALSE
ARF1	chr1	228267373	+	28	GTTATcttggattcctccagtgatg	P1P2	-3064	1.68873	1.29286	0.147731	FALSE
ARF1	chr1	228267374	+	27	GTTATcttggattcctccagtgat	P1P2	-3063	1.54217	1.31111	0.193313	FALSE
ARF1	chr1	228267375	+	26	GTTATcttggattcctccagtga	P1P2	-3062	0.674411	1.33077	0.0886866	FALSE
ARF1	chr1	228267391	+	28	GCCTCTGCAGACTGCAATGTTATct	P1P2	-3046		2.07143	0.0720774	FALSE
ARF1	chr1	228267558	+	25	GCCaggccacagatgttcagag	P1P2	-2879	-0.454652	1.432	0.178218	FALSE
ARF1	chr1	228267558	+	27	GAGCCaggccacagatgttcagag	P1P2	-2879	0.212861	1.47778	0.178218	FALSE
ARF1	chr1	228267577	+	24	GAAGTGTGCGGCATTTGAGCC	P1P2	-2860	-1.11047	2.39583	0.13798	FALSE
ARF1	chr1	228267590	+	23	GTGCAGGGCTATGAAGTGTG	P1P2	-2847	-0.827109	3.00435	0.401892	FALSE
ARF1	chr1	228267590	+	25	GAGTGCAGGGCTATGAAGTGTG	P1P2	-2847	0.953918	2.996	0.401892	FALSE
ARF1	chr1	228267605	+	28	GCACTTTGGTCAACCTCTGAGTGCA	P1P2	-2832	0.223971	2.63929	0.140686	FALSE
ARF1	chr1	228267606	+	27	GCACTTTGGTCAACCTCTGAGTGC	P1P2	-2831	-0.99167	2.61852	0.067626	FALSE
ARF1	chr1	228267606	+	28	GGCACTTTGGTCAACCTCTGAGTGC	P1P2	-2831	0.6961	2.6	0.067626	FALSE
ARF1	chr1	228267632	+	28	GACCCCAGCCCACCTCAGGCCTGGC	P1P2	-2805	0.559246	1.975	0.0498952	FALSE
ARF1	chr1	228267636	+	25	GGACCCCAGCCCACCTCAGGCC	P1P2	-2801	0.697638	1.944	0.0460713	FALSE
ARF1	chr1	228267636	+	26	GGGACCCCAGCCCACCTCAGGCC	P1P2	-2801	-0.224885	1.93462	0.0460713	FALSE
ARF1	chr1	228267636	+	27	GGGGACCCCAGCCCACCTCAGGCC	P1P2	-2801	0.17039	1.92222	0.0460713	FALSE
ARF1	chr1	228267641	+	27	GTGAAGGGGACCCCAGCCCACCTC	P1P2	-2796	-0.1835	1.84444	0.019878	FALSE
ARF1	chr1	228267641	+	28	GGTGAAGGGGACCCCAGCCCACCTC	P1P2	-2796	-0.470063	1.83929	0.019878	FALSE
ARF1	chr1	228267659	+	26	GCAGCCATTGTGGCTAGGTGAAG	P1P2	-2778	-0.220139	1.87308	0.092738	FALSE
ARF1	chr1	228267659	+	27	GGCAGCCATTGTGGCTAGGTGAAG	P1P2	-2778	0.27997	1.87778	0.092738	FALSE
ARF1	chr1	228267660	+	25	GCAGCCATTGTGGCTAGGTGAA	P1P2	-2777	0.564655	1.88	0.135469	FALSE
ARF1	chr1	228267660	+	26	GGCAGCCATTGTGGCTAGGTGAA	P1P2	-2777	0.41745	1.88462	0.135469	FALSE
ARF1	chr1	228267661	+	24	GCAGCCATTGTGGCTAGGTGA	P1P2	-2776	-2.50792	1.8875	0.13083	FALSE
ARF1	chr1	228267661	+	25	GGCAGCCATTGTGGCTAGGTGA	P1P2	-2776	1.14365	1.892	0.13083	FALSE
ARF1	chr1	228267661	+	28	GTAGGCAGCCATTGTGGCTAGGTGA	P1P2	-2776	0.0408247	1.90357	0.13083	FALSE
ARF1	chr1	228267667	+	28	GACCTAGTAGGCAGCCATTGTGGCT	P1P2	-2770	-0.807907	1.93571	0.229144	FALSE
ARF1	chr1	228267672	+	26	GGAGACCTAGTAGGCAGCCATTG	P1P2	-2765	0.608172	1.93462	0.0852359	FALSE
ARF1	chr1	228267672	+	27	GGGAGACCTAGTAGGCAGCCATTG	P1P2	-2765	-0.794073	1.91852	0.0852359	FALSE
ARF1	chr1	228267684	+	27	GAATACCCATGTGGGAGACCTAGT	P1P2	-2753	0.723016	1.62222	0.176099	FALSE
ARF1	chr1	228267684	+	28	GGAATACCCATGTGGGAGACCTAGT	P1P2	-2753	0.0477322	1.61071	0.176099	FALSE
ARF1	chr1	228267696	+	27	GCAAAGGAGCAGGAATACCCATGT	P1P2	-2741	0.0299001	1.35185	0.0285594	FALSE
ARF1	chr1	228267696	+	28	GGCAAAGGAGCAGGAATACCCATGT	P1P2	-2741	-0.54138	1.34643	0.0285594	FALSE
ARF1	chr1	228267697	+	26	GCAAAGGAGCAGGAATACCCATG	P1P2	-2740	0.987507	1.34231	0.243087	FALSE
ARF1	chr1	228267697	+	27	GGCAAAGGAGCAGGAATACCCATG	P1P2	-2740	0.314306	1.33704	0.243087	FALSE
ARF1	chr1	228267697	+	28	GGGCAAAGGAGCAGGAATACCCATG	P1P2	-2740	-0.0177283	1.32857	0.243087	FALSE
ARF1	chr1	228267710	+	28	GATGGGCTGTCTGGGGCAAAGGAGC	P1P2	-2727	0.320706	1.13571	0.0567611	FALSE
ARF1	chr1	228267722	+	28	GCTGGAAGGACAGATGGGCTGTCTG	P1P2	-2715	0.015205	1.13571	0.12065	FALSE
ARF1	chr1	228267723	+	27	GCTGGAAGGACAGATGGGCTGTCT	P1P2	-2714	0.844987	1.13333	0.00513446	FALSE
ARF1	chr1	228267723	+	28	GGCTGGAAGGACAGATGGGCTGTCT	P1P2	-2714	-0.845878	1.15714	0.00513446	FALSE
ARF1	chr1	228267724	+	26	GCTGGAAGGACAGATGGGCTGTC	P1P2	-2713	0.656168	1.13077	0.0541955	FALSE
ARF1	chr1	228267724	+	27	GGCTGGAAGGACAGATGGGCTGTC	P1P2	-2713	0.319667	1.15556	0.0541955	FALSE
ARF1	chr1	228267732	+	27	GGGAAGGTGGCTGGAAGGACAGAT	P1P2	-2705	-0.0530518	1.45556	0.476113	FALSE
ARF1	chr1	228267741	+	27	GGCCTCCTAGGGAAGGTGGCTGGA	P1P2	-2696	-0.0457132	1.94815	0.045488	FALSE
ARF1	chr1	228267745	+	26	GCTGGCCTCCTAGGGAAGGTGGC	P1P2	-2692	-0.91053	2.12692	0.122546	FALSE
ARF1	chr1	228267745	+	27	GGCTGGCCTCCTAGGGAAGGTGGC	P1P2	-2692	-0.519773	2.14074	0.122546	FALSE
ARF1	chr1	228267745	+	28	GGGCTGGCCTCCTAGGGAAGGTGGC	P1P2	-2692	-0.810551	2.15357	0.122546	FALSE
ARF1	chr1	228267749	+	28	GAACGGGCTGGCCTCCTAGGGAAGG	P1P2	-2688	-0.194727	2.3	0.105797	FALSE
ARF1	chr1	228267752	+	25	GAACGGGCTGGCCTCCTAGGGA	P1P2	-2685	0.586199	2.364	0.0143589	FALSE
ARF1	chr1	228267766	+	22	GCCAAACAACAGAACGGGC	P1P2	-2671	-2.75725	2.54091	0.103454	FALSE
ARF1	chr1	228267766	+	25	GATGCCAAACAACAGAACGGGC	P1P2	-2671	0.11348	2.548	0.103454	FALSE
ARF1	chr1	228267766	+	26	GGATGCCAAACAACAGAACGGGC	P1P2	-2671	-0.114811	2.55	0.103454	FALSE
ARF1	chr1	228267766	+	27	GGGATGCCAAACAACAGAACGGGC	P1P2	-2671	0.508911	2.54815	0.103454	FALSE
ARF1	chr1	228267770	+	27	GACAGGGATGCCAAACAACAGAAC	P1P2	-2667	2.48308	2.53333	0.316917	FALSE
ARF1	chr1	228267771	+	26	GACAGGGATGCCAAACAACAGAA	P1P2	-2666	-0.113315	2.53462	0.29328	FALSE
ARF1	chr1	228267771	+	28	GAGACAGGGATGCCAAACAACAGAA	P1P2	-2666	-1.49186	2.50714	0.29328	FALSE
ARF1	chr1	228267790	+	28	GCACCCGAGAACCAGGTCAGAGACA	P1P2	-2647	-0.659906	1.63929	0.644196	FALSE
ARF1	chr1	228267791	+	27	GCACCCGAGAACCAGGTCAGAGAC	P1P2	-2646	-0.775654	1.6037	0.0514308	FALSE
ARF1	chr1	228267802	+	23	GGTGGCTGCACCCGAGAACC	P1P2	-2635	1.70533	0.978261	0.113359	FALSE
ARF1	chr1	228267802	+	24	GGGTGGCTGCACCCGAGAACC	P1P2	-2635	0.337598	0.9625	0.113359	FALSE
ARF1	chr1	228267802	+	25	GGGGTGGCTGCACCCGAGAACC	P1P2	-2635	0.164246	0.948	0.113359	FALSE
ARF1	chr1	228267802	+	26	GGGGGTGGCTGCACCCGAGAACC	P1P2	-2635	1.41823	0.934615	0.113359	FALSE
ARF1	chr1	228267820	+	26	GCTGGGCTTCTCTCCTCTGGGGG	P1P2	-2617	0.889939	0.734615	0.289194	FALSE
ARF1	chr1	228267820	+	27	GGCTGGGCTTCTCTCCTCTGGGGG	P1P2	-2617	1.15611	0.740741	0.289194	FALSE
ARF1	chr1	228267820	+	28	GGGCTGGGCTTCTCTCCTCTGGGGG	P1P2	-2617	0.881431	0.746428	0.289194	FALSE
ARF1	chr1	228267823	+	28	GTTGGGCTGGGCTTCTCTCCTCTGG	P1P2	-2614	0.650317	0.789286	0.231682	FALSE
ARF1	chr1	228267824	+	27	GTTGGGCTGGGCTTCTCTCCTCTG	P1P2	-2613	0.159998	0.796296	0.105405	FALSE
ARF1	chr1	228267824	+	28	GGTTGGGCTGGGCTTCTCTCCTCTG	P1P2	-2613	-0.828476	0.803571	0.105405	FALSE
ARF1	chr1	228267825	+	26	GTTGGGCTGGGCTTCTCTCCTCT	P1P2	-2612	0.349285	0.803846	0.0313788	FALSE
ARF1	chr1	228267825	+	27	GGTTGGGCTGGGCTTCTCTCCTCT	P1P2	-2612	-0.923219	0.811111	0.0313788	FALSE
ARF1	chr1	228267826	+	25	GTTGGGCTGGGCTTCTCTCCTC	P1P2	-2611	-0.0174617	0.812	0.00140593	FALSE
ARF1	chr1	228267826	+	26	GGTTGGGCTGGGCTTCTCTCCTC	P1P2	-2611	1.07179	0.819231	0.00140593	FALSE
ARF1	chr1	228267840	+	24	GACGCCAGCTCAGGTTGGGCT	P1P2	-2597	0.34787	1.05417	0.0913665	FALSE
ARF1	chr1	228267845	+	27	GTCTCAAAGACGCCAGCTCAGGTT	P1P2	-2592	0.951173	1.18519	0.107598	FALSE
ARF1	chr1	228267846	+	26	GTCTCAAAGACGCCAGCTCAGGT	P1P2	-2591	-0.467044	1.19615	0.111294	FALSE
ARF1	chr1	228267850	+	26	GTCAGTCTCAAAGACGCCAGCTC	P1P2	-2587	-0.0948408	1.28077	0.101212	FALSE
ARF1	chr1	228267887	+	25	GGCAGGGACCCTCCAGCCTTCG	P1P2	-2550	-0.753428	0.948	0.0339593	FALSE
ARF1	chr1	228267887	+	26	GGGCAGGGACCCTCCAGCCTTCG	P1P2	-2550	-1.23534	0.946154	0.0339593	FALSE
ARF1	chr1	228267905	+	25	GGTTTGGGGGCCAGGCTGGGCA	P1P2	-2532	2.64008	0.864	0.247664	FALSE
ARF1	chr1	228267905	+	26	GGGTTTGGGGGCCAGGCTGGGCA	P1P2	-2532	-1.66209	0.861538	0.247664	FALSE
ARF1	chr1	228267905	+	27	GGGGTTTGGGGGCCAGGCTGGGCA	P1P2	-2532	0.543675	0.859259	0.247664	FALSE
ARF1	chr1	228267906	+	26	GGGGTTTGGGGGCCAGGCTGGGC	P1P2	-2531	2.91427	0.857692	0.00437268	FALSE
ARF1	chr1	228267906	+	28	GAGGGGTTTGGGGGCCAGGCTGGGC	P1P2	-2531	0.652271	0.853571	0.00437268	FALSE
ARF1	chr1	228267910	+	25	GGAGGGGTTTGGGGGCCAGGCT	P1P2	-2527	-0.315454	0.844	0.0300568	FALSE
ARF1	chr1	228267910	+	26	GGGAGGGGTTTGGGGGCCAGGCT	P1P2	-2527	0.592689	0.842308	0.0300568	FALSE
ARF1	chr1	228267910	+	28	GAGGGAGGGGTTTGGGGGCCAGGCT	P1P2	-2527	0.617659	0.839286	0.0300568	FALSE
ARF1	chr1	228267911	+	27	GAGGGAGGGGTTTGGGGGCCAGGC	P1P2	-2526	1.04733	0.837037	0.00700383	FALSE
ARF1	chr1	228267911	+	28	GGAGGGAGGGGTTTGGGGGCCAGGC	P1P2	-2526	0.735989	0.835714	0.00700383	FALSE
ARF1	chr1	228267915	+	28	GACTGGAGGGAGGGGTTTGGGGGCC	P1P2	-2522	2.30104	0.821428	0.00138367	FALSE
ARF1	chr1	228267920	+	28	GAGCTGACTGGAGGGAGGGGTTTGG	P1P2	-2517	0.130429	0.821429	0.0532941	FALSE
ARF1	chr1	228267921	+	27	GAGCTGACTGGAGGGAGGGGTTTG	P1P2	-2516	1.42737	0.818519	0.012482	FALSE
ARF1	chr1	228267922	+	26	GAGCTGACTGGAGGGAGGGGTTT	P1P2	-2515	2.73616	0.819231	0.00888479	FALSE
ARF1	chr1	228267923	+	28	GATGAGCTGACTGGAGGGAGGGGTT	P1P2	-2514	-0.909116	0.828571	0.00570612	FALSE
ARF1	chr1	228267928	+	24	GGATGAGCTGACTGGAGGGAG	P1P2	-2509	-1.24278	0.8375	0.33482	FALSE
ARF1	chr1	228267928	+	25	GGGATGAGCTGACTGGAGGGAG	P1P2	-2509	0.948011	0.84	0.33482	FALSE
ARF1	chr1	228267928	+	27	GTGGGATGAGCTGACTGGAGGGAG	P1P2	-2509	-0.021963	0.844444	0.33482	FALSE
ARF1	chr1	228267928	+	28	GGTGGGATGAGCTGACTGGAGGGAG	P1P2	-2509	0.23799	0.846429	0.33482	FALSE
ARF1	chr1	228267929	+	27	GGTGGGATGAGCTGACTGGAGGGA	P1P2	-2508	0.183971	0.848148	0.170933	FALSE
ARF1	chr1	228267929	+	28	GGGTGGGATGAGCTGACTGGAGGGA	P1P2	-2508	-0.432481	0.85	0.170933	FALSE
ARF1	chr1	228267930	+	25	GTGGGATGAGCTGACTGGAGGG	P1P2	-2507	0.363946	0.848	0.154325	FALSE
ARF1	chr1	228267930	+	26	GGTGGGATGAGCTGACTGGAGGG	P1P2	-2507	0.113179	0.85	0.154325	FALSE
ARF1	chr1	228267930	+	27	GGGTGGGATGAGCTGACTGGAGGG	P1P2	-2507	1.53092	0.851852	0.154325	FALSE
ARF1	chr1	228267930	+	28	GGGGTGGGATGAGCTGACTGGAGGG	P1P2	-2507	0.730293	0.853571	0.154325	FALSE
ARF1	chr1	228267933	+	24	GGGTGGGATGAGCTGACTGGA	P1P2	-2504	0.259933	0.858333	0.351422	FALSE
ARF1	chr1	228267933	+	25	GGGGTGGGATGAGCTGACTGGA	P1P2	-2504	1.441	0.86	0.351422	FALSE
ARF1	chr1	228267933	+	27	GAGGGGTGGGATGAGCTGACTGGA	P1P2	-2504	0.344095	0.87037	0.351422	FALSE
ARF1	chr1	228267934	+	24	GGGGTGGGATGAGCTGACTGG	P1P2	-2503	1.65136	0.8625	0.273985	FALSE
ARF1	chr1	228267934	+	26	GAGGGGTGGGATGAGCTGACTGG	P1P2	-2503	-0.15366	0.873077	0.273985	FALSE
ARF1	chr1	228267937	+	28	GCCAAGAGGGGTGGGATGAGCTGAC	P1P2	-2500	-0.380615	0.907143	0.0177571	FALSE
ARF1	chr1	228267950	+	26	GATGAGGTTTAGCCAAGAGGGGT	P1P2	-2487	-1.39212	1.03846	0.102552	FALSE
ARF1	chr1	228267951	+	22	GAGGTTTAGCCAAGAGGGG	P1P2	-2486	1.23162	1.02273	0.334527	FALSE
ARF1	chr1	228267951	+	25	GATGAGGTTTAGCCAAGAGGGG	P1P2	-2486	1.03693	1.044	0.334527	FALSE
ARF1	chr1	228267954	+	27	GATCAGATGAGGTTTAGCCAAGAG	P1P2	-2483	-0.767054	1.08519	0.435635	FALSE
ARF1	chr1	228267954	+	28	GGATCAGATGAGGTTTAGCCAAGAG	P1P2	-2483	0.540026	1.08571	0.435635	FALSE
ARF1	chr1	228267955	+	26	GATCAGATGAGGTTTAGCCAAGA	P1P2	-2482	0.760856	1.09231	0.0353057	FALSE
ARF1	chr1	228267955	+	27	GGATCAGATGAGGTTTAGCCAAGA	P1P2	-2482	0.260465	1.09259	0.0353057	FALSE
ARF1	chr1	228267955	+	28	GGGATCAGATGAGGTTTAGCCAAGA	P1P2	-2482	0.421182	1.09286	0.0353057	FALSE
ARF1	chr1	228267956	+	26	GGATCAGATGAGGTTTAGCCAAG	P1P2	-2481	0.431589	1.1	0.335096	FALSE
ARF1	chr1	228267956	+	27	GGGATCAGATGAGGTTTAGCCAAG	P1P2	-2481	-0.253252	1.1	0.335096	FALSE
ARF1	chr1	228267988	+	25	GGATCCCTTTCTCTCTCCTCTG	P1P2	-2449	0.39287	0.988	0.191476	FALSE
ARF1	chr1	228267988	+	26	GGGATCCCTTTCTCTCTCCTCTG	P1P2	-2449	2.23788	0.992308	0.191476	FALSE
ARF1	chr1	228268012	+	28	GCTCCCCCAACGCTGCCTAGGGAGT	P1P2	-2425	-0.921415	0.739286	0.015788	FALSE
ARF1	chr1	228268018	+	25	GGTGCTCCCCCAACGCTGCCTA	P1P2	-2419	-1.06478	0.616	0.143591	FALSE
ARF1	chr1	228268041	+	25	GTTCCTGGGGTAATTGAGGCCC	P1P2	-2396	1.55905	0.556	0.0688303	FALSE
ARF1	chr1	228268041	+	27	GAGTTCCTGGGGTAATTGAGGCCC	P1P2	-2396	1.3335	0.577778	0.0688303	FALSE
ARF1	chr1	228268047	+	26	GCAGTGAGTTCCTGGGGTAATTG	P1P2	-2390	0.69599	0.692308	0.124524	FALSE
ARF1	chr1	228268047	+	27	GGCAGTGAGTTCCTGGGGTAATTG	P1P2	-2390	2.20066	0.707407	0.124524	FALSE
ARF1	chr1	228268056	+	27	GAAGTGTCAGGCAGTGAGTTCCTG	P1P2	-2381	-0.548638	0.992593	0.303159	FALSE
ARF1	chr1	228268057	+	23	GTGTCAGGCAGTGAGTTCCT	P1P2	-2380	-0.2692	0.934783	0.081695	FALSE
ARF1	chr1	228268057	+	26	GAAGTGTCAGGCAGTGAGTTCCT	P1P2	-2380	-0.36044	1.00769	0.081695	FALSE
ARF1	chr1	228268058	+	25	GAAGTGTCAGGCAGTGAGTTCC	P1P2	-2379	-0.894998	1.024	0.00178151	FALSE
ARF1	chr1	228268089	+	25	GCCCCTGGAAGGAGACCCACTA	P1P2	-2348	0.319777	1.696	0.270856	FALSE
ARF1	chr1	228268090	+	24	GCCCCTGGAAGGAGACCCACT	P1P2	-2347	-0.471158	1.68333	0.0998343	FALSE
ARF1	chr1	228268106	+	25	GTCACACCCAGATTTCTGCCCC	P1P2	-2331	3.30556	1.196	0.0459729	FALSE
ARF1	chr1	228268106	+	28	GTAGTCACACCCAGATTTCTGCCCC	P1P2	-2331	-0.0459106	1.19643	0.0459729	FALSE
ARF1	chr1	228268141	+	26	GTCTTCAGGCCAAACAGGCGCAG	P1P2	-2296	0.998369	1.38846	0.201621	FALSE
ARF1	chr1	228268142	+	25	GTCTTCAGGCCAAACAGGCGCA	P1P2	-2295	-1.13353	1.404	0.502987	FALSE
ARF1	chr1	228268142	+	28	GATGTCTTCAGGCCAAACAGGCGCA	P1P2	-2295	0.189325	1.45714	0.502987	FALSE
ARF1	chr1	228268143	+	24	GTCTTCAGGCCAAACAGGCGC	P1P2	-2294	1.4268	1.42083	0.268564	FALSE
ARF1	chr1	228268143	+	27	GATGTCTTCAGGCCAAACAGGCGC	P1P2	-2294	-0.273294	1.47407	0.268564	FALSE
ARF1	chr1	228268158	+	23	GGGGCAAAGATGATGTCTTC	P1P2	-2279	1.0512	1.73913	0.0478417	FALSE
ARF1	chr1	228268177	+	26	GTTTGGGCTCCCCACCACCACCG	P1P2	-2260	-0.831047	0.803846	0.309847	FALSE
ARF1	chr1	228268177	+	27	GGTTTGGGCTCCCCACCACCACCG	P1P2	-2260	0.22513	0.788889	0.309847	FALSE
ARF1	chr1	228268196	+	25	GCTGATTCTGTGCTCCTGGTTT	P1P2	-2241	0.075619	0.4	0.0608601	FALSE
ARF1	chr1	228268197	+	24	GCTGATTCTGTGCTCCTGGTT	P1P2	-2240	0.110674	0.395833	0.0125331	FALSE
ARF1	chr1	228268298	+	26	gttcaaggttacagtgacctagt	P1P2	-2139	1.41078	0.392308	0.193313	FALSE
ARF1	chr1	228268433	+	28	gttaagaaatGTACCTTCCccagcc	P1P2	-2004	0.523315	0.903571	0.180446	FALSE
ARF1	chr1	228268460	+	25	gattcctgtatagccagcccta	P1P2	-1977	-0.048367	0.776	0.193313	FALSE
ARF1	chr1	228268460	+	26	ggattcctgtatagccagcccta	P1P2	-1977	-0.220894	0.776923	0.193313	FALSE
ARF1	chr1	228268461	+	24	gattcctgtatagccagccct	P1P2	-1976	-2.27044	0.770833	0.193313	FALSE
ARF1	chr1	228268461	+	25	ggattcctgtatagccagccct	P1P2	-1976	-0.431451	0.772	0.193313	FALSE
ARF1	chr1	228268914	+	24	GTCACTGAGCGGGGATTGTGT	P1P2	-1523	0.229741	1.5	0.2897	FALSE
ARF1	chr1	228268914	+	25	GGTCACTGAGCGGGGATTGTGT	P1P2	-1523	-0.106069	1.504	0.2897	FALSE
[truncated: 50,919 more rows]
