# Supplementary figures and images for: Nucleosomes impede Cas9 access to DNA in vivo and in vitro
Source: eLife journal article supplement (doi:10.7554/elife.12677), 2016-03-17

Figure 4 – figure supplement 1

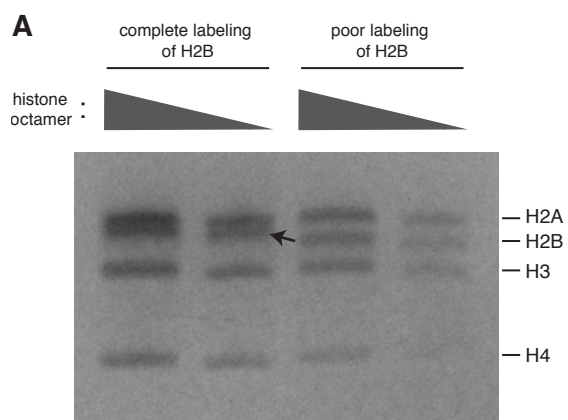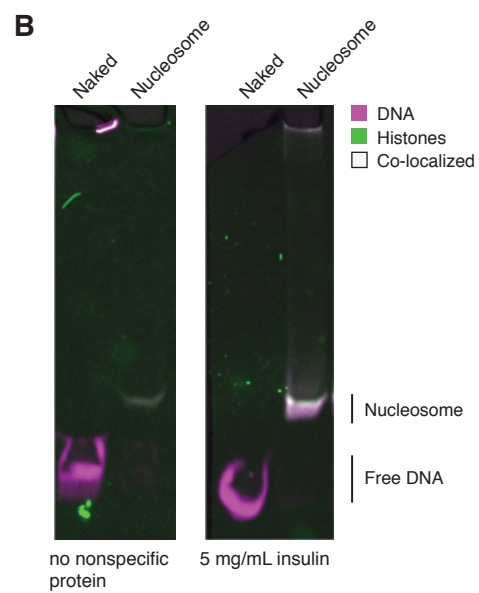

Supplement: supp [file elife-12677-supp-v1.zip]

Figure 4 – figure supplement 2

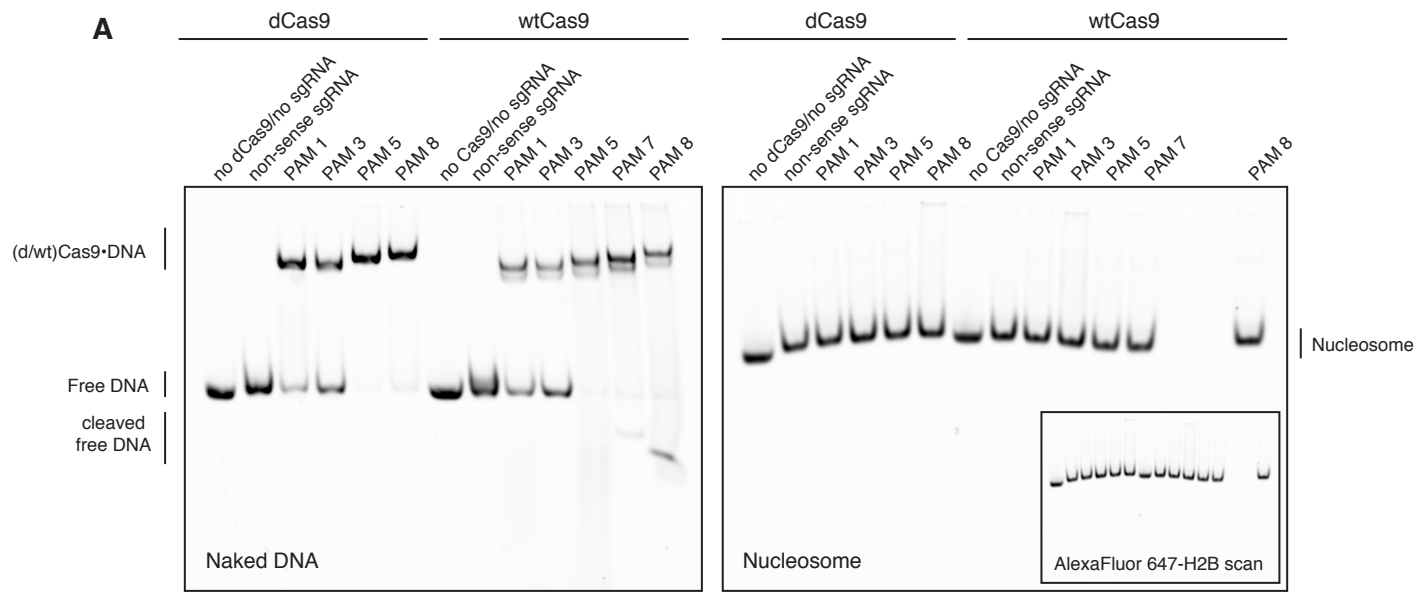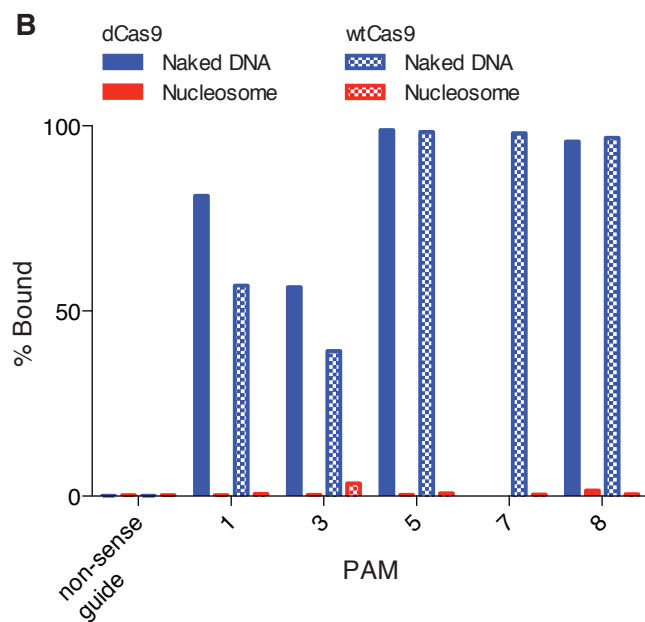

Supplement: supp [file elife-12677-supp-v1.zip]

Figure 4 – figure supplement 3

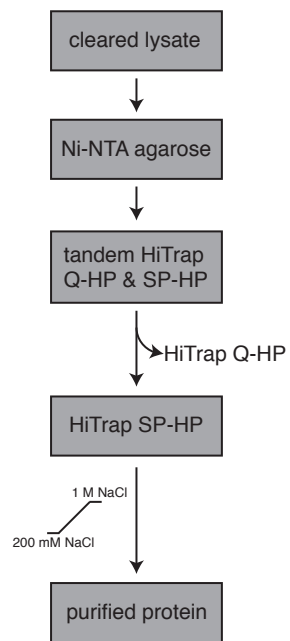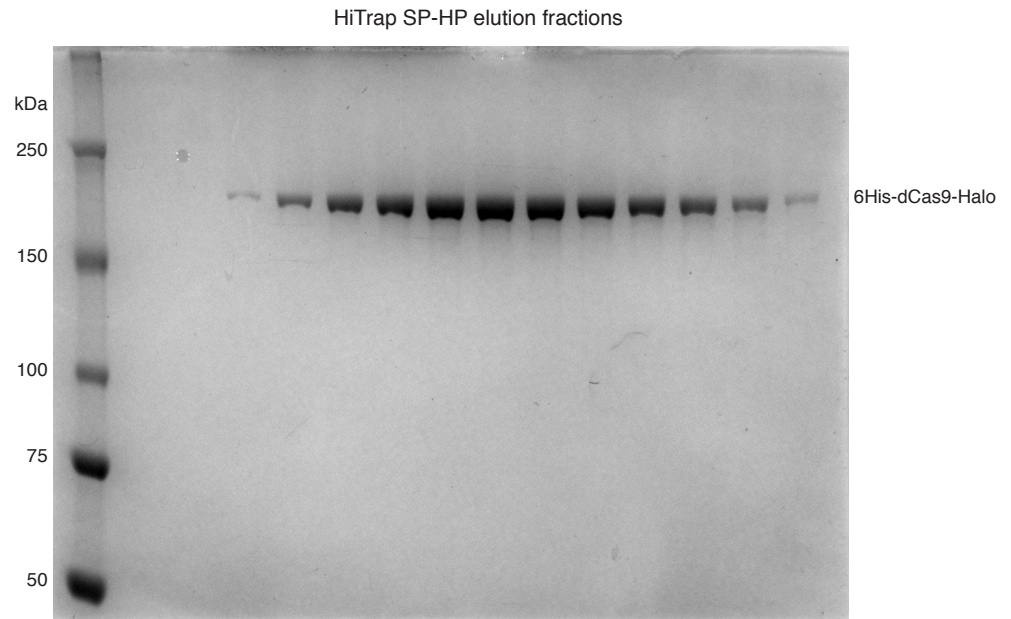

Supplement: supp [file elife-12677-supp-v1.zip]

Figure 3 – figure supplement 1

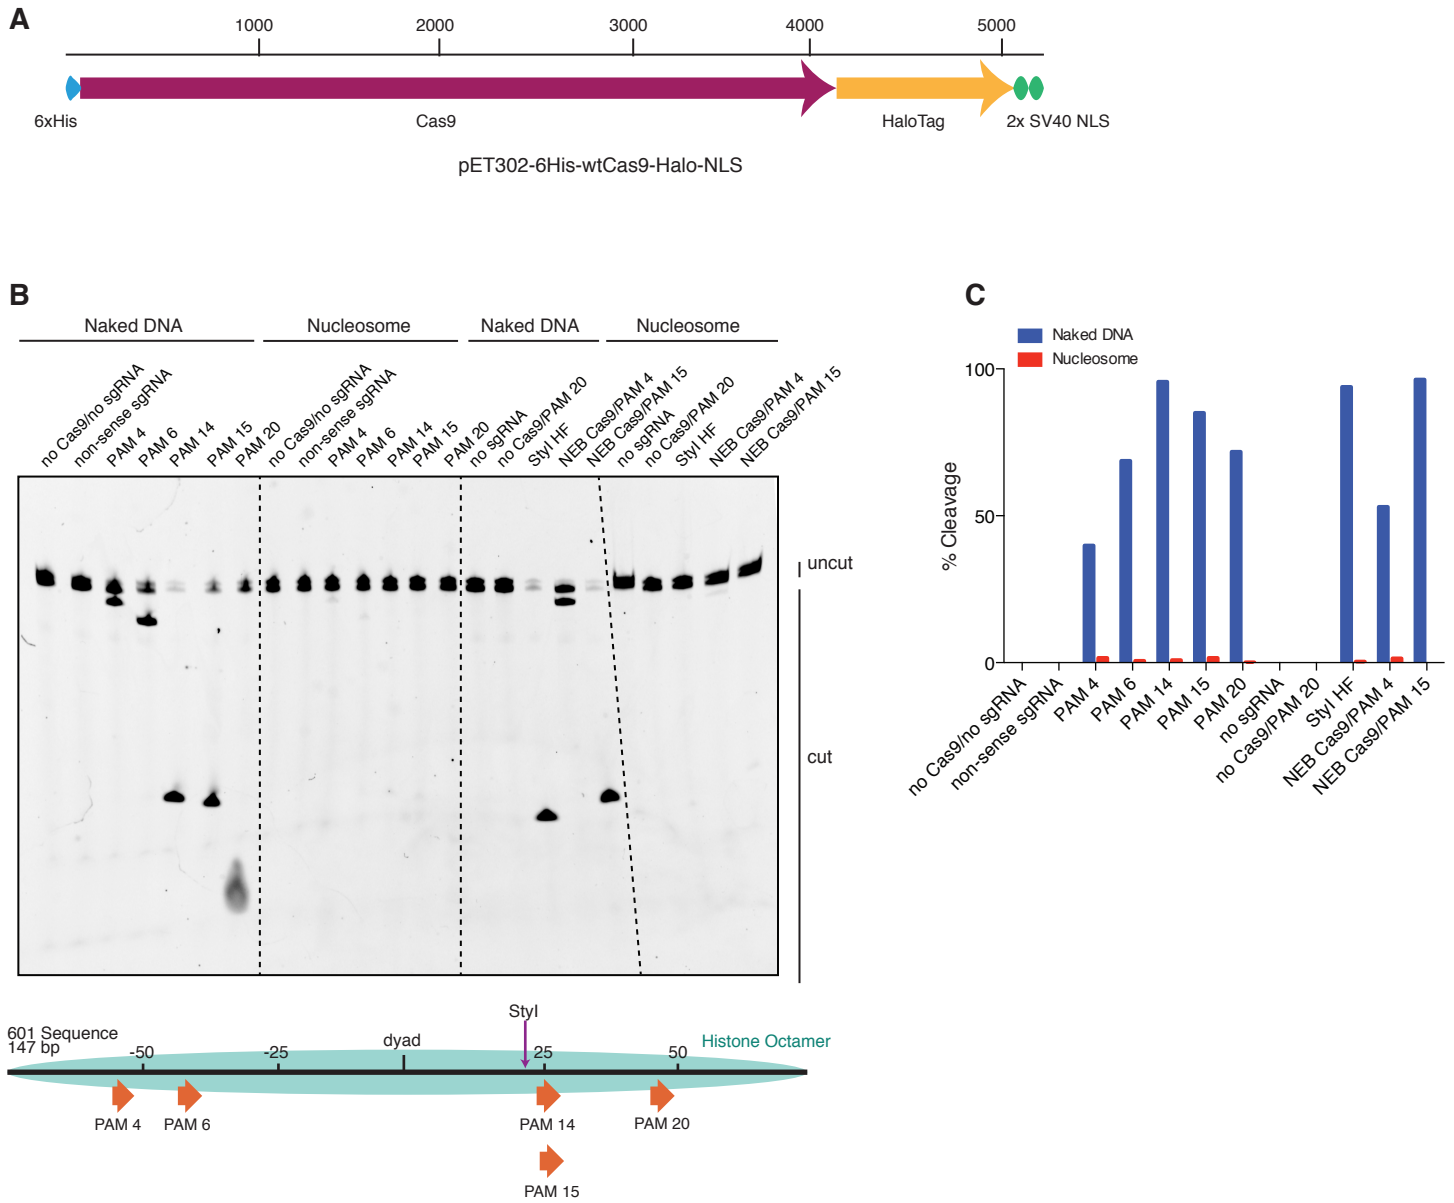

Supplement: supp [file elife-12677-supp-v1.zip]

Figure 2 – figure supplement 1

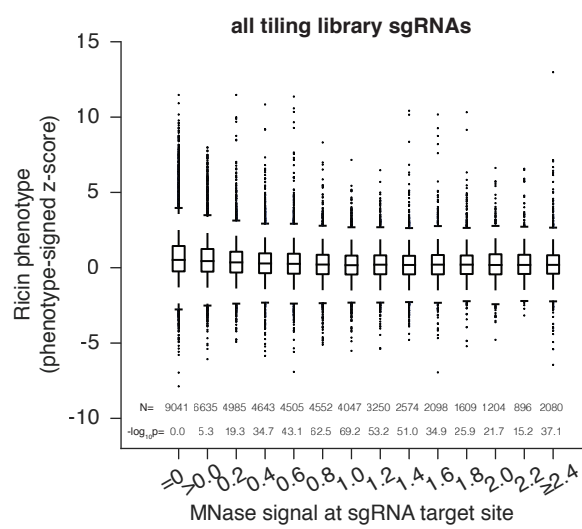

Supplement: supp [file elife-12677-supp-v1.zip]
